# Supplementary material
Source: Research Square preprint supplement (doi:10.21203/rs.3.rs-9415526/v1)
Supplement: Supplementary file 1 [file 397988aca220b493029e3c0e.xlsx]

## Sheet: Normal Distribution
Sample_size	Change_pattern	Magnitude_change	SNR	Method	Bias_range	MSE_range	Bias_variance	MSE_variance	Bias_MADM	MSE_MADM	Bias_NCP	MSE_NCP	Bias_area	MSE_area
30–50	No change	0	0.33	ARIMA	0.306417	1.04527	0.0584754	0.0429443	0.0571662	0.036558	0.0952381	0.0952381	0.875266	0.928051
30–50	No change	0	0.33	FLSA	0.548261	0.583804	0.082125	0.0230616	0.150321	0.0451184	1.62857	4.04762	0.562234	0.728171
30–50	No change	0	0.33	GAM	1.10235	1.70318	0.145452	0.0461675	0.2713	0.100138	1.02381	1.09048	0.498561	0.811083
30–50	No change	0	0.33	LOWESS	1.22384	1.7953	0.159164	0.0425362	0.292983	0.102688	1.02857	1.08571	0.469919	0.808528
30–50	No change	0	0.33	MA	2.35609	6.02958	0.184328	0.0422053	0.260148	0.0744504	1.00476	1.02381	0.370165	0.751723
30–50	No change	0	0.33	PELT	0.204609	0.547772	0.0340805	0.0248317	0.0198511	0.00670015	0.166667	0.261905	0.914259	0.960386
30–50	No change	0	0.33	PR	1.10149	2.29023	0.149455	0.0912208	0.259906	0.0992666	0.0619048	0.138095	0.611103	0.833395
30–50	No change	0	0.66	ARIMA	0.264811	0.877457	0.0459444	0.0371371	0.0473627	0.0278862	0.0904762	0.0904762	0.894209	0.940947
30–50	No change	0	0.66	FLSA	0.426272	0.369339	0.0512438	0.00791948	0.114445	0.0261777	1.50952	3.54762	0.622222	0.775967
30–50	No change	0	0.66	GAM	0.858087	1.06502	0.0892853	0.0196629	0.209718	0.0611702	1.01429	1.05238	0.579023	0.864651
30–50	No change	0	0.66	LOWESS	0.95764	1.11673	0.0977244	0.0171331	0.229361	0.0635432	1.03333	1.10952	0.552465	0.859555
30–50	No change	0	0.66	MA	1.88869	3.91984	0.11588	0.0174266	0.203333	0.0456325	1.00952	1.0381	0.466859	0.822519
30–50	No change	0	0.66	PELT	0.167395	0.415723	0.0206278	0.00748246	0.0144106	0.00332071	0.133333	0.238095	0.935177	0.972894
30–50	No change	0	0.66	PR	0.834873	1.34199	0.0871052	0.0315077	0.196824	0.0577283	0.052381	0.119048	0.710039	0.906213
30–50	No change	0	1	ARIMA	0.20239	0.552474	0.0287938	0.018208	0.0362335	0.0177445	0.0857143	0.0857143	0.919342	0.962587
30–50	No change	0	1	FLSA	0.3522	0.253427	0.039439	0.00581948	0.100517	0.021189	1.46667	3.52381	0.648352	0.783336
30–50	No change	0	1	GAM	0.763337	0.860025	0.0713939	0.013412	0.186241	0.0488818	1.01429	1.05238	0.609193	0.880552
30–50	No change	0	1	LOWESS	0.852204	0.885904	0.0768595	0.0110261	0.204037	0.0502156	1.0381	1.11429	0.584895	0.87647
30–50	No change	0	1	MA	1.68147	3.12461	0.0907129	0.0109134	0.178115	0.034993	1.01905	1.08571	0.509472	0.846326
30–50	No change	0	1	PELT	0.0609198	0.0771612	0.00435911	0.00054134	0.00421021	0.000411526	0.0904762	0.147619	0.97168	0.989661
30–50	No change	0	1	PR	0.751378	1.16058	0.0707797	0.0224161	0.172543	0.0455138	0.0619048	0.128571	0.742164	0.922652
30–50	No change	0	2	ARIMA	0.170879	0.38418	0.0214738	0.00977004	0.0320959	0.0133967	0.0857143	0.0857143	0.930065	0.972523
30–50	No change	0	2	FLSA	0.311125	0.202806	0.0297408	0.00278057	0.085334	0.0151929	1.41429	3.27143	0.672757	0.803111
30–50	No change	0	2	GAM	0.667071	0.669708	0.0547239	0.00846814	0.162331	0.0375169	1	1	0.641697	0.897839
30–50	No change	0	2	LOWESS	0.739172	0.686496	0.0579254	0.00663782	0.176778	0.0380192	1.04762	1.15238	0.618415	0.889605
30–50	No change	0	2	MA	1.4774	2.41489	0.0684091	0.00625723	0.153789	0.0260089	1.0381	1.18095	0.550164	0.86407
30–50	No change	0	2	PELT	0.0460183	0.0564305	0.00326013	0.00040673	0.00418634	0.000643363	0.0809524	0.138095	0.975822	0.990466
30–50	No change	0	2	PR	0.681999	0.976502	0.0603581	0.0171634	0.152521	0.0379846	0.0904762	0.166667	0.764898	0.932514
30–50	Jump	0.25	0.33	ARIMA	0.119261	1.23405	0.0605686	0.0612534	0.0101891	0.0401133	-0.890476	0.890476	0.799165	0.873997
30–50	Jump	0.25	0.33	FLSA	0.293663	0.39101	0.0630035	0.0151417	0.0800375	0.023925	0.528571	1.76667	0.794165	0.870941
30–50	Jump	0.25	0.33	GAM	0.846916	1.26142	0.137839	0.0495458	0.213433	0.0751113	0.0285714	0.0571429	0.679769	0.890827
30–50	Jump	0.25	0.33	LOWESS	0.96387	1.28215	0.148517	0.0440945	0.231181	0.0732571	0.0333333	0.0428571	0.649432	0.894324
30–50	Jump	0.25	0.33	MA	2.14099	5.06293	0.17579	0.0400454	0.202155	0.0475845	0	0.00952381	0.519414	0.840839
30–50	Jump	0.25	0.33	PELT	-0.050374	0.489502	0.0196326	0.0210216	-0.0400635	0.00642672	-0.842857	0.928571	0.81945	0.926595
30–50	Jump	0.25	0.33	PR	0.871779	1.95118	0.15118	0.104959	0.206005	0.0800621	-0.914286	1.01905	0.566421	0.808687
30–50	Jump	0.25	0.66	ARIMA	0.0892863	0.839262	0.0392752	0.0251433	0.00497281	0.02751	-0.866667	0.866667	0.820943	0.904496
30–50	Jump	0.25	0.66	FLSA	0.149717	0.201779	0.0337064	0.005978	0.0456506	0.0125301	0.471429	1.51905	0.856259	0.899864
30–50	Jump	0.25	0.66	GAM	0.615912	0.768437	0.0844833	0.0223796	0.15465	0.0444477	0.0142857	0.0238095	0.771275	0.93719
30–50	Jump	0.25	0.66	LOWESS	0.715805	0.763126	0.0911324	0.0195869	0.171816	0.043672	0.0190476	0.0190476	0.74385	0.939084
30–50	Jump	0.25	0.66	MA	1.64165	3.01499	0.105789	0.0155299	0.146299	0.0261778	0.00952381	0.0285714	0.639542	0.90792
30–50	Jump	0.25	0.66	PELT	-0.100404	0.332299	0.0059526	0.00606712	-0.0442657	0.00463462	-0.857143	0.971429	0.816342	0.933665
30–50	Jump	0.25	0.66	PR	0.612489	1.15722	0.0886101	0.0423098	0.145117	0.0453761	-0.919048	1.02381	0.652677	0.870148
30–50	Jump	0.25	1	ARIMA	0.0785216	0.714387	0.0317695	0.016696	0.00245859	0.0233497	-0.857143	0.857143	0.829276	0.913555
30–50	Jump	0.25	1	FLSA	0.0970411	0.15403	0.0253385	0.00446712	0.0352506	0.0108501	0.428571	1.47619	0.880422	0.90495
30–50	Jump	0.25	1	GAM	0.537698	0.627911	0.068365	0.0158249	0.134081	0.0355765	0.0142857	0.0238095	0.802156	0.949785
30–50	Jump	0.25	1	LOWESS	0.627803	0.613118	0.0723751	0.0130775	0.148771	0.0340241	0.0238095	0.0238095	0.777819	0.952293
30–50	Jump	0.25	1	MA	1.44492	2.3663	0.0824744	0.00983022	0.123666	0.0192578	0.00952381	0.0190476	0.688174	0.929642
30–50	Jump	0.25	1	PELT	-0.20248	0.102216	-0.00757956	0.000554786	-0.0536427	0.0032322	-0.938095	0.966667	0.785748	0.941436
30–50	Jump	0.25	1	PR	0.521177	0.964772	0.0685476	0.02748	0.12145	0.0350223	-0.914286	1.0381	0.685516	0.886102
30–50	Jump	0.25	2	ARIMA	0.126025	0.722797	0.0382785	0.0372113	0.0134605	0.0272552	-0.804762	0.804762	0.822574	0.906508
30–50	Jump	0.25	2	FLSA	0.0369712	0.119467	0.0142458	0.00335216	0.0151503	0.00793516	0.442857	1.69048	0.904147	0.896497
30–50	Jump	0.25	2	GAM	0.448365	0.493063	0.0532526	0.0105514	0.112328	0.027964	0	0	0.837273	0.962094
30–50	Jump	0.25	2	LOWESS	0.524753	0.45632	0.0537366	0.00819838	0.123492	0.0250789	0.0380952	0.0571429	0.814345	0.963025
30–50	Jump	0.25	2	MA	1.22748	1.73947	0.0602914	0.00568808	0.0994719	0.0132991	0.0142857	0.0238095	0.740496	0.948926
30–50	Jump	0.25	2	PELT	-0.201192	0.0964843	-0.00774259	0.000500792	-0.0523559	0.00349732	-0.919048	0.97619	0.789527	0.940824
30–50	Jump	0.25	2	PR	0.429389	0.688311	0.0548892	0.0189725	0.101851	0.0298364	-0.909524	0.995238	0.713671	0.900676
30–50	Jump	0.5	0.33	ARIMA	-0.0279969	1.57818	0.048663	0.0822968	-0.0287718	0.0513835	-0.861905	0.861905	0.809719	0.853287
30–50	Jump	0.5	0.33	FLSA	-0.0109471	0.286912	0.0303908	0.0175555	0.0233608	0.0245115	0.557143	1.70952	0.874584	0.874763
30–50	Jump	0.5	0.33	GAM	0.71005	1.1578	0.135628	0.0606814	0.182202	0.0691413	0.0238095	0.0333333	0.717868	0.89589
30–50	Jump	0.5	0.33	LOWESS	0.804181	1.07685	0.140201	0.0517937	0.195581	0.0627683	0.0142857	0.0142857	0.697117	0.90662
30–50	Jump	0.5	0.33	MA	1.88582	4.01504	0.148348	0.0324162	0.154916	0.0322249	0.0190476	0.0380952	0.587216	0.87647
30–50	Jump	0.5	0.33	PELT	-0.27988	0.697517	-0.0112071	0.0232819	-0.0961809	0.014578	-0.833333	0.947619	0.766302	0.914087
30–50	Jump	0.5	0.33	PR	0.646255	1.56083	0.13161	0.098808	0.161839	0.0703022	-0.938095	0.985714	0.618149	0.827325
30–50	Jump	0.5	0.66	ARIMA	0.0373468	1.36849	0.0513554	0.106871	-0.0129337	0.0511598	-0.8	0.8	0.82645	0.853247
30–50	Jump	0.5	0.66	FLSA	-0.08595	0.200812	0.00260829	0.00656626	-0.00566416	0.0123248	0.561905	1.75238	0.891016	0.887085
30–50	Jump	0.5	0.66	GAM	0.500113	0.753322	0.0817932	0.0293921	0.128231	0.0434788	0.0142857	0.0238095	0.804514	0.936156
30–50	Jump	0.5	0.66	LOWESS	0.590889	0.686969	0.0853344	0.0254095	0.142611	0.0391127	0.0285714	0.0571429	0.779988	0.940754
30–50	Jump	0.5	0.66	MA	1.40863	2.29361	0.0804557	0.0118544	0.102669	0.0169937	0.0047619	0.0142857	0.707998	0.932738
30–50	Jump	0.5	0.66	PELT	-0.323012	0.506241	-0.023121	0.00947724	-0.0988558	0.0133128	-0.842857	0.966667	0.752518	0.922289
30–50	Jump	0.5	0.66	PR	0.463614	1.14244	0.080792	0.0491715	0.112504	0.0456797	-0.919048	0.995238	0.690165	0.869569
30–50	Jump	0.5	1	ARIMA	0.0877663	1.27571	0.0472929	0.0756744	-0.00389662	0.0469972	-0.747619	0.766667	0.83689	0.869637
30–50	Jump	0.5	1	FLSA	-0.132185	0.191857	-0.00545268	0.0051363	-0.0198706	0.0113004	0.519048	1.57619	0.881965	0.898169
30–50	Jump	0.5	1	GAM	0.441089	0.635373	0.0657424	0.0214388	0.112514	0.0359095	0.0047619	0.0047619	0.831401	0.948593
30–50	Jump	0.5	1	LOWESS	0.518318	0.551714	0.0667078	0.017787	0.124156	0.031194	0.0428571	0.0809524	0.807957	0.951472
30–50	Jump	0.5	1	MA	1.21991	1.74957	0.0576797	0.00733608	0.082229	0.0125473	0.0142857	0.0238095	0.754076	0.948848
30–50	Jump	0.5	1	PELT	-0.432129	0.292422	-0.0376176	0.00357629	-0.107961	0.0128959	-0.919048	0.966667	0.716887	0.928768
30–50	Jump	0.5	1	PR	0.398843	0.937832	0.0626059	0.0326161	0.0951334	0.0367769	-0.919048	0.97619	0.715603	0.886874
30–50	Jump	0.5	2	ARIMA	0.0357177	0.955364	0.0291222	0.0484129	-0.0103904	0.038144	-0.719048	0.757143	0.853656	0.892035
30–50	Jump	0.5	2	FLSA	-0.113222	0.16479	-0.00377967	0.0046233	-0.0149743	0.0106083	0.652381	1.76667	0.866588	0.88895
30–50	Jump	0.5	2	GAM	0.382766	0.511444	0.0505721	0.0149471	0.0991479	0.0291147	0	0	0.85588	0.959325
30–50	Jump	0.5	2	LOWESS	0.441743	0.421324	0.0485602	0.0113807	0.104878	0.023671	0.0238095	0.0333333	0.841938	0.965237
30–50	Jump	0.5	2	MA	1.00102	1.21847	0.0350277	0.00394489	0.061524	0.0089616	0.00952381	0.00952381	0.807027	0.964894
30–50	Jump	0.5	2	PELT	-0.429036	0.281489	-0.0338871	0.0073081	-0.10486	0.0139576	-0.914286	0.971429	0.721492	0.926653
30–50	Jump	0.5	2	PR	0.363644	0.797306	0.0567235	0.0299504	0.0888775	0.0354689	-0.87619	0.980952	0.732184	0.891274
30–50	Jump	1	0.33	ARIMA	-0.0273607	3.24772	0.0587005	0.309759	-0.0422314	0.118116	-0.719048	0.757143	0.819712	0.710281
30–50	Jump	1	0.33	FLSA	-0.534086	0.606207	-0.100621	0.0322596	-0.0920288	0.035884	0.366667	1.6619	0.76411	0.857793
30–50	Jump	1	0.33	GAM	0.576071	1.25415	0.109534	0.0959216	0.153132	0.0737676	0.0238095	0.0428571	0.764613	0.878984
30–50	Jump	1	0.33	LOWESS	0.623183	1.03163	0.102999	0.0794371	0.156518	0.0615873	0.00952381	0.00952381	0.761437	0.900405
30–50	Jump	1	0.33	MA	1.41032	2.43215	0.0413259	0.0194522	0.0741619	0.0196967	0.0190476	0.0380952	0.741323	0.923956
30–50	Jump	1	0.33	PELT	-0.761543	1.19844	-0.133057	0.067864	-0.199308	0.0552472	-0.819048	0.942857	0.600901	0.857794
30–50	Jump	1	0.33	PR	0.491889	1.91637	0.102672	0.150902	0.125893	0.0828621	-0.909524	0.966667	0.670765	0.796334
30–50	Jump	1	0.66	ARIMA	0.00346909	2.52386	0.0236534	0.173511	-0.0361646	0.0938707	-0.666667	0.67619	0.853465	0.783894
30–50	Jump	1	0.66	FLSA	-0.434176	0.508635	-0.0931298	0.0280705	-0.079349	0.0271337	0.666667	1.67619	0.742894	0.866988
30–50	Jump	1	0.66	GAM	0.465924	0.861707	0.055525	0.0524363	0.121235	0.0485876	0	0	0.827962	0.923662
30–50	Jump	1	0.66	LOWESS	0.511317	0.707021	0.0527736	0.042487	0.122572	0.0404023	0.00952381	0.00952381	0.821169	0.93642
30–50	Jump	1	0.66	MA	0.925153	1.15897	-0.0269628	0.0106632	0.0311378	0.0124867	0.0333333	0.052381	0.837879	0.958669
30–50	Jump	1	0.66	PELT	-0.755985	1.13664	-0.125502	0.0604518	-0.192569	0.0544633	-0.82381	0.938095	0.60777	0.862129
30–50	Jump	1	0.66	PR	0.462926	1.58646	0.0715982	0.099348	0.109693	0.0628659	-0.833333	0.97619	0.708531	0.833031
30–50	Jump	1	1	ARIMA	0.0116143	2.38438	0.0234027	0.19511	-0.0315471	0.0920589	-0.638095	0.647619	0.860095	0.783175
30–50	Jump	1	1	FLSA	-0.398405	0.438858	-0.0896522	0.0258248	-0.0697423	0.0238942	0.861905	1.9	0.724916	0.859474
30–50	Jump	1	1	GAM	0.443675	0.727454	0.0396511	0.0402632	0.113591	0.0402821	0	0	0.84356	0.937296
30–50	Jump	1	1	LOWESS	0.458544	0.568545	0.0327356	0.031295	0.108453	0.0326087	0.00952381	0.00952381	0.847047	0.949462
30–50	Jump	1	1	MA	0.739804	0.805046	-0.0504017	0.0102393	0.0142347	0.0109133	0.0571429	0.0761905	0.858283	0.966254
30–50	Jump	1	1	PELT	-0.802177	1.01149	-0.129219	0.0564473	-0.195588	0.0514466	-0.842857	0.928571	0.597271	0.868714
30–50	Jump	1	1	PR	0.430005	1.2796	0.0448497	0.0669108	0.0995078	0.0490706	-0.838095	0.933333	0.730216	0.861948
30–50	Jump	1	2	ARIMA	0.0992727	2.03278	0.0237856	0.142049	-0.0105337	0.083517	-0.557143	0.57619	0.875608	0.815406
30–50	Jump	1	2	FLSA	-0.360049	0.402079	-0.0804466	0.0245899	-0.0592858	0.02357	0.909524	2.03333	0.732286	0.853607
30–50	Jump	1	2	GAM	0.430672	0.590002	0.0257495	0.0296563	0.107632	0.0322986	0	0	0.85599	0.950306
30–50	Jump	1	2	LOWESS	0.413887	0.451379	0.0156465	0.0224734	0.0960173	0.0256639	0.0047619	0.0047619	0.870334	0.960904
30–50	Jump	1	2	MA	0.52287	0.482162	-0.0721745	0.0125132	-0.0017738	0.00997715	0.109524	0.147619	0.87496	0.96916
30–50	Jump	1	2	PELT	-0.757814	0.972037	-0.12136	0.0533528	-0.187424	0.050318	-0.814286	0.9	0.613389	0.87283
30–50	Jump	1	2	PR	0.489935	1.1577	0.0488162	0.0571744	0.110301	0.0464659	-0.752381	0.895238	0.727706	0.871378
30–50	Jump	2	0.33	ARIMA	0.566467	8.0163	0.179755	1.52261	0.0557915	0.29554	-0.466667	0.485714	0.728607	0.272381
30–50	Jump	2	0.33	FLSA	-1.13199	1.96611	-0.496482	0.380288	-0.217825	0.100576	0.642857	1.70952	0.431089	0.680016
30–50	Jump	2	0.33	GAM	0.681972	1.5855	-0.0149975	0.242773	0.173632	0.0867254	0	0	0.782867	0.82055
30–50	Jump	2	0.33	LOWESS	0.635363	1.27533	-0.0448333	0.205062	0.153442	0.071718	0.00952381	0.00952381	0.78811	0.8493
30–50	Jump	2	0.33	MA	0.522877	0.77337	-0.389409	0.201111	-0.0463595	0.0304689	0.114286	0.152381	0.686694	0.886054
30–50	Jump	2	0.33	PELT	-1.3142	3.66439	-0.439162	0.643426	-0.33371	0.190581	-0.661905	0.871429	0.383906	0.561203
30–50	Jump	2	0.33	PR	0.919849	3.42579	0.0922732	0.461979	0.199856	0.124282	-0.671429	0.861905	0.618964	0.656721
30–50	Jump	2	0.66	ARIMA	0.913111	7.18193	0.247154	1.12998	0.138399	0.265454	-0.342857	0.371429	0.630616	0.376782
30–50	Jump	2	0.66	FLSA	-0.984263	1.60635	-0.461821	0.307516	-0.195013	0.0789077	0.795238	1.85238	0.448424	0.714874
30–50	Jump	2	0.66	GAM	0.691561	1.17864	-0.0507909	0.154708	0.15475	0.0572119	0	0	0.778571	0.878695
30–50	Jump	2	0.66	LOWESS	0.564879	0.855795	-0.0992269	0.132173	0.128321	0.046841	0	0	0.790134	0.900618
30–50	Jump	2	0.66	MA	0.116595	0.431363	-0.437543	0.273081	-0.0706913	0.0347799	0.147619	0.204762	0.684901	0.863742
30–50	Jump	2	0.66	PELT	-0.860135	2.87724	-0.26504	0.506463	-0.24097	0.140847	-0.438095	0.752381	0.560699	0.647494
30–50	Jump	2	0.66	PR	0.914734	2.33751	0.0404583	0.264849	0.184994	0.0803911	-0.557143	0.814286	0.664055	0.764806
30–50	Jump	2	1	ARIMA	1.28261	6.38778	0.291132	0.817864	0.205822	0.223443	-0.204762	0.271429	0.552562	0.481706
30–50	Jump	2	1	FLSA	-0.95694	1.64407	-0.438016	0.314028	-0.192975	0.0839934	0.666667	1.70476	0.477143	0.716151
30–50	Jump	2	1	GAM	0.70569	1.05802	-0.0582168	0.126067	0.145226	0.0473961	0.0047619	0.0047619	0.779164	0.897727
30–50	Jump	2	1	LOWESS	0.548145	0.730272	-0.112304	0.110076	0.119044	0.0385421	0.0047619	0.0047619	0.791468	0.916663
30–50	Jump	2	1	MA	0.0074279	0.464703	-0.439495	0.287571	-0.0724802	0.035192	0.128571	0.157143	0.696606	0.860764
30–50	Jump	2	1	PELT	-0.61576	2.30143	-0.166132	0.415004	-0.183002	0.114415	-0.314286	0.638095	0.677134	0.706209
30–50	Jump	2	1	PR	0.958389	2.0204	0.0375237	0.203371	0.177532	0.0647677	-0.457143	0.714286	0.677199	0.80553
30–50	Jump	2	2	ARIMA	1.72039	5.48966	0.386012	0.609355	0.303871	0.186126	-0.0333333	0.119048	0.437756	0.574027
30–50	Jump	2	2	FLSA	-0.981038	1.6696	-0.446998	0.294126	-0.206307	0.0843127	0.671429	1.7	0.464928	0.721565
30–50	Jump	2	2	GAM	0.732243	0.952417	-0.0560006	0.0958016	0.135223	0.0382365	0.0047619	0.0047619	0.783423	0.916862
30–50	Jump	2	2	LOWESS	0.534992	0.608898	-0.122355	0.0869062	0.110842	0.0306649	0.0047619	0.0047619	0.793643	0.932999
30–50	Jump	2	2	MA	-0.097822	0.58345	-0.427125	0.301881	-0.0695861	0.038828	0.214286	0.271429	0.682296	0.845163
30–50	Jump	2	2	PELT	-0.180297	1.3051	-0.0321682	0.260291	-0.0902316	0.0635788	-0.047619	0.466667	0.890136	0.815341
30–50	Jump	2	2	PR	1.01799	1.88205	0.0485947	0.153055	0.163438	0.0529266	-0.261905	0.661905	0.698658	0.835059
30–50	Linear	0.25	0.33	ARIMA	0.199516	1.58577	0.0788133	0.0806695	-0.0022816	0.0493775	-1.87143	3.61429	0.626137	0.713958
30–50	Linear	0.25	0.33	FLSA	0.254169	0.370499	0.0603388	0.0164833	0.0473801	0.0230942	-0.547619	1.68095	0.816956	0.876173
30–50	Linear	0.25	0.33	GAM	0.839238	1.27377	0.138276	0.0515007	0.183843	0.0642396	-0.97619	0.995238	0.579015	0.851387
30–50	Linear	0.25	0.33	LOWESS	0.961964	1.28596	0.149798	0.0459571	0.205887	0.0628486	-0.971429	0.971429	0.550935	0.855154
30–50	Linear	0.25	0.33	MA	2.01946	4.43616	0.161829	0.0340562	0.167807	0.0354941	-1	1.00952	0.457569	0.817192
30–50	Linear	0.25	0.33	PELT	-0.0119547	0.596364	0.0300236	0.0271669	-0.0587411	0.012043	-1.80476	3.61429	0.653746	0.77215
30–50	Linear	0.25	0.33	PR	0.772392	1.59959	0.129752	0.0831534	0.162758	0.0597796	-1.94762	3.90952	0.473479	0.691027
30–50	Linear	0.25	0.66	ARIMA	0.14622	1.0252	0.0495341	0.0312537	-0.0114208	0.0325594	-1.84762	3.54286	0.646344	0.753494
30–50	Linear	0.25	0.66	FLSA	0.164557	0.194078	0.0371052	0.0070234	0.0306209	0.0144412	-0.352381	1.46667	0.88102	0.901025
30–50	Linear	0.25	0.66	GAM	0.594403	0.756267	0.0829337	0.022887	0.122887	0.0362787	-0.985714	0.995238	0.660183	0.892878
30–50	Linear	0.25	0.66	LOWESS	0.692396	0.738214	0.0887909	0.0192645	0.139665	0.0341512	-0.961905	0.971429	0.641325	0.897358
30–50	Linear	0.25	0.66	MA	1.56898	2.71374	0.0992881	0.0139862	0.115098	0.0186288	-0.995238	1.00476	0.554479	0.870896
30–50	Linear	0.25	0.66	PELT	-0.165378	0.234579	-0.00078027	0.0037557	-0.0765304	0.00742945	-1.91905	3.80476	0.628869	0.778449
30–50	Linear	0.25	0.66	PR	0.544861	0.910467	0.0771718	0.0331902	0.107733	0.0348115	-1.94286	3.88571	0.540277	0.735144
30–50	Linear	0.25	1	ARIMA	0.144428	0.995797	0.0526296	0.0613652	-0.00992262	0.035753	-1.8381	3.51429	0.647058	0.743921
30–50	Linear	0.25	1	FLSA	0.103103	0.146398	0.0249083	0.00400938	0.0116098	0.010345	-0.461905	1.61429	0.889406	0.898066
30–50	Linear	0.25	1	GAM	0.507086	0.603558	0.0656334	0.0159757	0.100315	0.0280751	-0.990476	1	0.689278	0.90447
30–50	Linear	0.25	1	LOWESS	0.596735	0.589571	0.0694112	0.0130521	0.11476	0.0257503	-0.97619	0.97619	0.672033	0.908839
30–50	Linear	0.25	1	MA	1.38411	2.13886	0.0772021	0.00883513	0.0924017	0.0128572	-0.985714	0.995238	0.596267	0.889029
30–50	Linear	0.25	1	PELT	-0.174384	0.169705	-0.00402882	0.00162477	-0.0778803	0.00697158	-1.9	3.75714	0.628684	0.783146
30–50	Linear	0.25	1	PR	0.470549	0.758784	0.0635441	0.0244151	0.0877811	0.0286027	-1.92857	3.84286	0.563993	0.746811
30–50	Linear	0.25	2	ARIMA	0.124114	0.778871	0.0401448	0.0393181	-0.0130121	0.0285703	-1.80952	3.42857	0.658846	0.763882
30–50	Linear	0.25	2	FLSA	0.0740734	0.113762	0.0160941	0.00208018	-0.000936679	0.00719471	-0.366667	1.41429	0.920172	0.912811
30–50	Linear	0.25	2	GAM	0.41568	0.462743	0.0497232	0.0104983	0.0779166	0.0212411	-1	1	0.7178	0.914551
30–50	Linear	0.25	2	LOWESS	0.487529	0.423385	0.0497057	0.00792416	0.0880203	0.0178343	-0.952381	0.980952	0.71143	0.919961
30–50	Linear	0.25	2	MA	1.17367	1.56555	0.0556129	0.00507628	0.0679141	0.00820298	-1	1	0.63953	0.905092
30–50	Linear	0.25	2	PELT	-0.216013	0.0917846	-0.00885258	0.000414193	-0.0810616	0.00691256	-1.92857	3.83333	0.616602	0.780676
30–50	Linear	0.25	2	PR	0.401425	0.69299	0.0506173	0.0183121	0.0665236	0.0229101	-1.90952	3.79524	0.588681	0.756213
30–50	Linear	0.5	0.33	ARIMA	0.0767121	1.9275	0.078697	0.11447	-0.0581834	0.0693164	-1.82381	3.48095	0.619399	0.691754
30–50	Linear	0.5	0.33	FLSA	-0.0559673	0.224089	0.0157214	0.0109325	-0.0425946	0.0208007	-0.490476	1.60476	0.875998	0.886651
30–50	Linear	0.5	0.33	GAM	0.666111	1.14781	0.133191	0.0644109	0.121154	0.054327	-1	1	0.628481	0.857619
30–50	Linear	0.5	0.33	LOWESS	0.792612	1.08395	0.144116	0.0570453	0.14483	0.0485435	-0.97619	0.985714	0.601623	0.866484
30–50	Linear	0.5	0.33	MA	1.77626	3.50787	0.140107	0.031158	0.0993623	0.0209421	-0.985714	0.995238	0.526782	0.848707
30–50	Linear	0.5	0.33	PELT	-0.223957	0.753397	0.00521727	0.045658	-0.137135	0.033924	-1.75714	3.52857	0.616605	0.753324
30–50	Linear	0.5	0.33	PR	0.607407	1.579	0.130154	0.104704	0.100959	0.0573952	-1.9381	3.8619	0.513603	0.688848
30–50	Linear	0.5	0.66	ARIMA	0.069937	1.5223	0.0597288	0.113645	-0.0591263	0.0585995	-1.79048	3.37143	0.634864	0.711262
30–50	Linear	0.5	0.66	FLSA	-0.152979	0.176861	-0.00710172	0.00464439	-0.0718552	0.017668	-0.542857	1.73333	0.842235	0.88503
30–50	Linear	0.5	0.66	GAM	0.446997	0.718445	0.0773621	0.0309205	0.0668226	0.0336135	-1	1	0.706859	0.89301
30–50	Linear	0.5	0.66	LOWESS	0.555625	0.66569	0.0839815	0.02662	0.0852521	0.0281819	-0.990476	0.990476	0.683572	0.900305
30–50	Linear	0.5	0.66	MA	1.32694	1.99642	0.0767958	0.0123647	0.0495484	0.0113095	-0.995238	1.00476	0.624669	0.891506
30–50	Linear	0.5	0.66	PELT	-0.40017	0.408493	-0.0314774	0.00689835	-0.157673	0.0275574	-1.89048	3.74762	0.559253	0.763927
30–50	Linear	0.5	0.66	PR	0.469809	1.2524	0.0860662	0.0558052	0.0585612	0.0389568	-1.89524	3.79048	0.570771	0.724811
30–50	Linear	0.5	1	ARIMA	0.155715	1.4199	0.0574538	0.0816385	-0.0438133	0.0529937	-1.72381	3.17143	0.64605	0.736677
30–50	Linear	0.5	1	FLSA	-0.211259	0.163967	-0.017826	0.00289624	-0.0864114	0.0173816	-0.614286	1.83333	0.809814	0.880608
30–50	Linear	0.5	1	GAM	0.387083	0.594144	0.0607268	0.0224259	0.0510121	0.0273384	-1	1	0.730234	0.903213
30–50	Linear	0.5	1	LOWESS	0.463631	0.516603	0.0626511	0.0184259	0.0630589	0.0218082	-0.990476	0.990476	0.715908	0.911012
30–50	Linear	0.5	1	MA	1.15233	1.52475	0.0558116	0.00808521	0.0303327	0.00892017	-0.990476	0.990476	0.663841	0.904873
30–50	Linear	0.5	1	PELT	-0.444517	0.294951	-0.038746	0.00371522	-0.161172	0.0284795	-1.91429	3.78095	0.547058	0.764397
30–50	Linear	0.5	1	PR	0.400723	1.03853	0.067146	0.0410612	0.0421466	0.0328513	-1.89524	3.77143	0.593485	0.737953
30–50	Linear	0.5	2	ARIMA	0.0541999	1.03277	0.0332766	0.0524888	-0.0593337	0.043679	-1.71905	3.15714	0.661507	0.759331
30–50	Linear	0.5	2	FLSA	-0.196623	0.175892	-0.0147987	0.00552314	-0.0835936	0.0173586	-0.514286	1.6	0.830081	0.892275
30–50	Linear	0.5	2	GAM	0.33007	0.475298	0.0457784	0.015613	0.0381185	0.0219701	-1	1	0.751145	0.912078
30–50	Linear	0.5	2	LOWESS	0.395101	0.411702	0.04581	0.0124643	0.045426	0.0168404	-0.985714	0.985714	0.742248	0.919289
30–50	Linear	0.5	2	MA	0.969563	1.11424	0.0348755	0.00468012	0.0101933	0.00706423	-0.985714	0.985714	0.705305	0.915852
30–50	Linear	0.5	2	PELT	-0.415691	0.347757	-0.0336336	0.00600914	-0.157224	0.0281334	-1.89048	3.74762	0.55708	0.764823
30–50	Linear	0.5	2	PR	0.352385	0.85446	0.0523094	0.028492	0.0312417	0.028385	-1.86667	3.72381	0.614637	0.750445
30–50	Linear	1	0.33	ARIMA	0.184208	3.90506	0.124955	0.417663	-0.101328	0.155679	-1.66667	3.02857	0.591063	0.544031
30–50	Linear	1	0.33	FLSA	-0.49214	0.600121	-0.0873292	0.0382997	-0.169662	0.0665668	-0.490476	1.77619	0.710902	0.826333
30–50	Linear	1	0.33	GAM	0.557711	1.25313	0.116981	0.113202	0.0552225	0.058988	-0.995238	0.995238	0.682688	0.837314
30–50	Linear	1	0.33	LOWESS	0.615107	1.06988	0.120359	0.0976776	0.0658118	0.0486148	-0.97619	0.985714	0.672327	0.854219
30–50	Linear	1	0.33	MA	1.34601	2.17606	0.056353	0.0333841	-0.0125884	0.0239314	-0.985714	0.995238	0.653379	0.871738
30–50	Linear	1	0.33	PELT	-0.757324	1.28006	-0.125793	0.0857404	-0.297662	0.11456	-1.78571	3.58571	0.438771	0.675248
30–50	Linear	1	0.33	PR	0.488295	1.73214	0.105996	0.139798	0.0302931	0.0679316	-1.92381	3.80952	0.567132	0.671788
30–50	Linear	1	0.66	ARIMA	0.30763	3.27936	0.108054	0.317285	-0.0746404	0.126783	-1.55238	2.68571	0.618192	0.613252
30–50	Linear	1	0.66	FLSA	-0.565999	0.543335	-0.110479	0.0297501	-0.184377	0.0589372	-0.419048	1.45714	0.69275	0.852513
30–50	Linear	1	0.66	GAM	0.435711	0.836718	0.061432	0.0616191	0.0250163	0.0389414	-0.995238	0.995238	0.73978	0.877068
30–50	Linear	1	0.66	LOWESS	0.485381	0.749445	0.0658942	0.0547009	0.0324543	0.0327636	-0.995238	0.995238	0.728122	0.885878
30–50	Linear	1	0.66	MA	0.903491	1.0795	-0.0100154	0.0185506	-0.0527456	0.0226402	-0.961905	0.971429	0.703515	0.900213
30–50	Linear	1	0.66	PELT	-0.795837	1.12182	-0.127495	0.0639634	-0.290348	0.111993	-1.8	3.57143	0.436416	0.686519
30–50	Linear	1	0.66	PR	0.482465	1.48309	0.0772226	0.0981703	0.0214537	0.0518571	-1.84762	3.70476	0.597838	0.704011
30–50	Linear	1	1	ARIMA	0.268171	2.67337	0.0772787	0.221636	-0.0768062	0.110927	-1.52381	2.59048	0.640692	0.664116
30–50	Linear	1	1	FLSA	-0.502276	0.454764	-0.10818	0.0227236	-0.169496	0.0487831	-0.119048	1.16667	0.750889	0.879687
30–50	Linear	1	1	GAM	0.409623	0.701137	0.0452726	0.0474042	0.0187993	0.0316985	-0.990476	0.990476	0.755113	0.890221
30–50	Linear	1	1	LOWESS	0.429715	0.603599	0.0441971	0.0403013	0.0193652	0.0259297	-0.990476	0.990476	0.753189	0.899016
30–50	Linear	1	1	MA	0.733244	0.769575	-0.0291321	0.017144	-0.0639264	0.0226864	-0.952381	0.952381	0.708197	0.907758
30–50	Linear	1	1	PELT	-0.809925	1.04447	-0.129357	0.0607043	-0.29155	0.110944	-1.81905	3.5619	0.431805	0.689906
30–50	Linear	1	1	PR	0.457544	1.19346	0.0583334	0.075214	0.0173156	0.0412873	-1.8381	3.6381	0.613059	0.726175
30–50	Linear	1	2	ARIMA	0.312611	2.36609	0.0742686	0.177222	-0.0612577	0.100752	-1.47619	2.4381	0.652887	0.695964
30–50	Linear	1	2	FLSA	-0.502855	0.433892	-0.110486	0.0211862	-0.166261	0.0470739	-0.190476	1.2381	0.742079	0.878175
30–50	Linear	1	2	GAM	0.397615	0.570331	0.030472	0.0343349	0.0148702	0.0239727	-0.97619	0.985714	0.768547	0.903396
30–50	Linear	1	2	LOWESS	0.389869	0.471477	0.0252836	0.0280446	0.0100518	0.0192162	-0.980952	0.980952	0.77409	0.911449
30–50	Linear	1	2	MA	0.559025	0.528757	-0.0497626	0.0168696	-0.0753811	0.0218961	-0.942857	0.942857	0.712151	0.913763
30–50	Linear	1	2	PELT	-0.807857	1.00111	-0.129559	0.0529594	-0.283018	0.109553	-1.80476	3.51905	0.437238	0.695914
30–50	Linear	1	2	PR	0.515136	1.05217	0.0613011	0.0635606	0.0312574	0.0361862	-1.7381	3.42381	0.615295	0.746774
30–50	Linear	2	0.33	ARIMA	0.936854	7.73714	0.300362	1.39245	-0.0318141	0.297294	-1.31905	2.07143	0.523202	0.248124
30–50	Linear	2	0.33	FLSA	-1.18601	1.96356	-0.502969	0.361751	-0.372015	0.203239	-0.366667	1.37619	0.385871	0.629986
30–50	Linear	2	0.33	GAM	0.732356	1.57588	0.0653078	0.304288	0.0257209	0.0658877	-0.971429	0.980952	0.709434	0.769371
30–50	Linear	2	0.33	LOWESS	0.692256	1.39354	0.0508953	0.274437	0.0183313	0.0604325	-1	1	0.720715	0.784633
30–50	Linear	2	0.33	MA	0.640061	1.01047	-0.248965	0.20851	-0.152012	0.0832255	-0.952381	0.961905	0.569198	0.796196
30–50	Linear	2	0.33	PELT	-1.26379	3.6906	-0.384083	0.708063	-0.47093	0.382908	-1.56667	3.07143	0.266209	0.352759
30–50	Linear	2	0.33	PR	0.860133	2.43526	0.108119	0.443845	0.0420318	0.0852103	-1.78095	3.48571	0.550808	0.578091
30–50	Linear	2	0.66	ARIMA	1.58217	6.26674	0.389859	0.809173	0.110384	0.162883	-1.09524	1.37143	0.42843	0.478704
30–50	Linear	2	0.66	FLSA	-1.19082	1.90639	-0.513431	0.352672	-0.369755	0.194353	-0.219048	1.26667	0.397493	0.64432
30–50	Linear	2	0.66	GAM	0.670845	1.09618	0.0101962	0.185748	0.0112378	0.0406715	-0.97619	0.97619	0.75098	0.833255
30–50	Linear	2	0.66	LOWESS	0.611805	0.967883	-0.00780228	0.165345	0.00199272	0.0375757	-0.980952	0.980952	0.76331	0.844105
30–50	Linear	2	0.66	MA	0.439675	0.695566	-0.250593	0.213242	-0.129139	0.065416	-0.928571	0.928571	0.601632	0.815817
30–50	Linear	2	0.66	PELT	-1.03112	2.80278	-0.27918	0.510548	-0.386609	0.303315	-1.45714	2.65714	0.358694	0.46464
30–50	Linear	2	0.66	PR	0.806822	1.62891	0.0417266	0.25762	0.032544	0.0521728	-1.71429	3.35238	0.601392	0.671287
30–50	Linear	2	1	ARIMA	1.78033	5.44252	0.421679	0.667165	0.167119	0.115332	-1	1.09524	0.387898	0.565889
30–50	Linear	2	1	FLSA	-1.21836	1.90302	-0.531197	0.339589	-0.378078	0.190431	-0.228571	1.1619	0.384496	0.655185
30–50	Linear	2	1	GAM	0.646721	0.931437	-0.00791159	0.147704	0.00706871	0.0318672	-0.971429	0.980952	0.757918	0.854711
30–50	Linear	2	1	LOWESS	0.580387	0.817545	-0.0290267	0.130372	-0.00320438	0.0290925	-0.966667	0.995238	0.757413	0.863701
30–50	Linear	2	1	MA	0.385839	0.637861	-0.246125	0.217536	-0.119271	0.0583981	-0.885714	0.914286	0.619835	0.821641
30–50	Linear	2	1	PELT	-0.858916	2.20099	-0.222626	0.410083	-0.325964	0.252364	-1.29048	2.23333	0.436815	0.545065
30–50	Linear	2	1	PR	0.840896	1.57207	0.0401918	0.208424	0.0318519	0.0403453	-1.6381	3.15238	0.610329	0.705037
30–50	Linear	2	2	ARIMA	1.69718	4.36086	0.371955	0.446291	0.173136	0.0813635	-0.938095	1.02381	0.416903	0.667524
30–50	Linear	2	2	FLSA	-1.25861	1.99009	-0.545414	0.348702	-0.392869	0.200475	-0.319048	1.3	0.361219	0.638147
30–50	Linear	2	2	GAM	0.620438	0.782592	-0.0216031	0.111148	0.00519269	0.0233155	-0.966667	0.985714	0.755676	0.875465
30–50	Linear	2	2	LOWESS	0.547312	0.658987	-0.0500139	0.0949011	-0.00885609	0.0207737	-0.995238	0.995238	0.742681	0.884476
30–50	Linear	2	2	MA	0.372613	0.684555	-0.222001	0.2259	-0.0987677	0.0495898	-0.87619	0.914286	0.644461	0.824884
30–50	Linear	2	2	PELT	-0.6108	1.54342	-0.145177	0.274145	-0.245626	0.174304	-1.15238	1.82857	0.544813	0.660213
30–50	Linear	2	2	PR	0.844531	1.43411	0.0236153	0.163845	0.0297247	0.0320335	-1.57143	3.04762	0.628655	0.731947
30–50	Quadratic	0.25	0.33	ARIMA	0.0991858	1.15233	0.0596398	0.05388	0.00287431	0.0367431	-2.89524	8.47619	0.47693	0.482767
30–50	Quadratic	0.25	0.33	FLSA	0.175705	0.287044	0.0481032	0.0132298	0.0453279	0.0180647	-1.69048	4.28095	0.653698	0.741406
30–50	Quadratic	0.25	0.33	GAM	0.838317	1.22707	0.139931	0.0486147	0.207834	0.0711998	-1.97619	3.94762	0.441655	0.697886
30–50	Quadratic	0.25	0.33	LOWESS	0.948343	1.23102	0.14814	0.0415263	0.224491	0.0690767	-1.98095	3.97143	0.422312	0.700147
30–50	Quadratic	0.25	0.33	MA	1.9344	4.06581	0.156299	0.0307138	0.187479	0.0415362	-2	4.00952	0.355551	0.674085
30–50	Quadratic	0.25	0.33	PELT	0.0013513	0.563287	0.0355617	0.0275621	-0.0335812	0.00969938	-2.77143	8.12381	0.506203	0.528713
30–50	Quadratic	0.25	0.33	PR	0.82242	1.7068	0.138487	0.0805257	0.192979	0.0682101	-2.9381	8.7381	0.328167	0.441793
30–50	Quadratic	0.25	0.66	ARIMA	0.0404155	0.727292	0.0361549	0.0208688	-0.00769263	0.0235649	-2.88571	8.42857	0.493602	0.50617
30–50	Quadratic	0.25	0.66	FLSA	0.158128	0.234592	0.0398278	0.00703554	0.0417822	0.0142045	-1.56667	3.78571	0.680987	0.773812
30–50	Quadratic	0.25	0.66	GAM	0.606679	0.72978	0.0861823	0.021534	0.149144	0.0410724	-1.98095	3.95238	0.507695	0.734005
30–50	Quadratic	0.25	0.66	LOWESS	0.698326	0.704799	0.089667	0.0167993	0.162389	0.0381982	-1.96667	3.92857	0.494781	0.739074
30–50	Quadratic	0.25	0.66	MA	1.512	2.51261	0.0957978	0.0121042	0.132395	0.0214354	-1.99524	4.00476	0.434535	0.718375
30–50	Quadratic	0.25	0.66	PELT	-0.142796	0.269246	0.00550153	0.00428066	-0.0522826	0.00411417	-2.90952	8.59524	0.483817	0.516279
30–50	Quadratic	0.25	0.66	PR	0.616982	1.16384	0.0876738	0.0349535	0.138543	0.0399831	-2.92381	8.67619	0.38149	0.476602
30–50	Quadratic	0.25	1	ARIMA	0.00490872	0.555068	0.0262886	0.0121182	-0.0135652	0.0186035	-2.88571	8.42857	0.49937	0.513116
30–50	Quadratic	0.25	1	FLSA	0.102883	0.163758	0.0294378	0.00597341	0.0323517	0.0121176	-1.51429	3.68571	0.704907	0.782228
30–50	Quadratic	0.25	1	GAM	0.52845	0.585287	0.0697336	0.0151216	0.128945	0.0322577	-1.99048	3.98095	0.529195	0.74275
30–50	Quadratic	0.25	1	LOWESS	0.60886	0.562821	0.0719335	0.011566	0.14033	0.0295933	-1.95714	3.90952	0.521078	0.749843
30–50	Quadratic	0.25	1	MA	1.30946	1.91041	0.0741654	0.00750143	0.110461	0.0153211	-1.98571	3.98571	0.470589	0.734682
30–50	Quadratic	0.25	1	PELT	-0.172859	0.169514	0.00066128	0.00159895	-0.0543287	0.00386091	-2.91429	8.61905	0.482832	0.517046
30–50	Quadratic	0.25	1	PR	0.510004	0.901527	0.0724229	0.0310729	0.119001	0.0350197	-2.90952	8.67143	0.403584	0.483031
30–50	Quadratic	0.25	2	ARIMA	-0.0108098	0.551467	0.0297056	0.0333671	-0.0149071	0.0216109	-2.88571	8.42857	0.496628	0.505016
30–50	Quadratic	0.25	2	FLSA	0.0456394	0.0978866	0.0171531	0.00177266	0.0143419	0.00617016	-1.52381	3.60952	0.724727	0.79298
30–50	Quadratic	0.25	2	GAM	0.435854	0.451147	0.0544556	0.0100968	0.10672	0.0247816	-2	4	0.552606	0.750511
30–50	Quadratic	0.25	2	LOWESS	0.4941	0.405439	0.0534767	0.00718669	0.113986	0.021291	-1.96667	3.90952	0.549704	0.759416
30–50	Quadratic	0.25	2	MA	1.12877	1.42995	0.0548578	0.00430434	0.0872486	0.010092	-1.99524	3.98571	0.502963	0.747034
30–50	Quadratic	0.25	2	PELT	-0.198651	0.101473	-0.00285966	0.000460678	-0.0544866	0.00397171	-2.89524	8.60952	0.482839	0.518637
30–50	Quadratic	0.25	2	PR	0.404808	0.666901	0.0523001	0.0176153	0.0907154	0.0240437	-2.91905	8.6619	0.427986	0.495137
30–50	Quadratic	0.5	0.33	ARIMA	-0.124706	1.25576	0.0450258	0.0580667	-0.0520004	0.0425562	-2.88571	8.42857	0.468073	0.480273
30–50	Quadratic	0.5	0.33	FLSA	0.0192075	0.324824	0.0508347	0.0188078	0.0153803	0.0227374	-1.52381	3.66667	0.708296	0.769179
30–50	Quadratic	0.5	0.33	GAM	0.62916	0.966816	0.132843	0.0527427	0.15686	0.0558706	-1.99048	3.97143	0.480264	0.709719
30–50	Quadratic	0.5	0.33	LOWESS	0.739497	0.903846	0.138949	0.0426652	0.173916	0.0505523	-1.97143	3.94286	0.464371	0.718824
30–50	Quadratic	0.5	0.33	MA	1.68685	3.16996	0.135763	0.0249961	0.126228	0.0222624	-1.98095	3.97143	0.409197	0.704967
30–50	Quadratic	0.5	0.33	PELT	-0.270773	0.605773	0.00887554	0.0227665	-0.0990332	0.0166687	-2.80476	8.16667	0.472537	0.524192
30–50	Quadratic	0.5	0.33	PR	0.601297	1.44359	0.129688	0.0880629	0.140959	0.0552472	-2.93333	8.71429	0.361146	0.448905
30–50	Quadratic	0.5	0.66	ARIMA	-0.144452	0.920055	0.0289109	0.0280344	-0.0538004	0.0336194	-2.85714	8.29524	0.479116	0.504286
30–50	Quadratic	0.5	0.66	FLSA	-0.129786	0.19022	0.012461	0.00498056	-0.0244503	0.0107616	-1.5619	3.70476	0.707736	0.781996
30–50	Quadratic	0.5	0.66	GAM	0.416552	0.587673	0.080506	0.0248409	0.103742	0.0328038	-1.99524	3.98571	0.543588	0.73903
30–50	Quadratic	0.5	0.66	LOWESS	0.502866	0.516758	0.0819561	0.0187235	0.115078	0.0272232	-1.95238	3.88571	0.536976	0.751203
30–50	Quadratic	0.5	0.66	MA	1.27739	1.86467	0.0780626	0.0093955	0.0745633	0.00985899	-1.99524	4.00476	0.485898	0.737497
30–50	Quadratic	0.5	0.66	PELT	-0.348903	0.456617	-0.00831224	0.00669373	-0.10408	0.0150305	-2.82857	8.39048	0.461994	0.519649
30–50	Quadratic	0.5	0.66	PR	0.38584	0.947808	0.076465	0.0390563	0.0862258	0.0322606	-2.91905	8.65238	0.418754	0.482262
30–50	Quadratic	0.5	1	ARIMA	-0.193552	0.725937	0.0153778	0.0170459	-0.0634735	0.0277004	-2.8619	8.31905	0.478678	0.511358
30–50	Quadratic	0.5	1	FLSA	-0.155923	0.168785	0.00824559	0.00382543	-0.0310277	0.0103019	-1.49048	3.60476	0.715511	0.788529
30–50	Quadratic	0.5	1	GAM	0.331074	0.475437	0.0632561	0.0178241	0.0832231	0.0261756	-2	4	0.567395	0.746727
30–50	Quadratic	0.5	1	LOWESS	0.414618	0.40313	0.0642824	0.0132467	0.0937925	0.0210938	-1.9619	3.91429	0.560857	0.757393
30–50	Quadratic	0.5	1	MA	1.08496	1.37194	0.056462	0.00536606	0.0533077	0.00625777	-1.99048	3.99048	0.521515	0.749968
30–50	Quadratic	0.5	1	PELT	-0.434253	0.304574	-0.0196246	0.00296097	-0.113755	0.0145122	-2.91429	8.61905	0.434773	0.51033
30–50	Quadratic	0.5	1	PR	0.2957	0.765608	0.0607375	0.0302802	0.0662646	0.0276234	-2.90952	8.62381	0.440347	0.490524
30–50	Quadratic	0.5	2	ARIMA	-0.120234	0.794846	0.0275205	0.0402597	-0.0479028	0.0324322	-2.80476	8.04286	0.491856	0.515783
30–50	Quadratic	0.5	2	FLSA	-0.175248	0.146985	0.00380886	0.00251131	-0.0340887	0.00926402	-1.41429	3.39524	0.72647	0.801549
30–50	Quadratic	0.5	2	GAM	0.251164	0.400512	0.0497085	0.0130043	0.0634833	0.0219635	-2	4	0.589665	0.752296
30–50	Quadratic	0.5	2	LOWESS	0.323929	0.311148	0.0474613	0.0087556	0.0713067	0.0157456	-1.98095	3.94286	0.584047	0.762388
30–50	Quadratic	0.5	2	MA	0.881827	0.929249	0.036295	0.00276553	0.0304231	0.00371663	-1.99524	3.98571	0.557763	0.759988
30–50	Quadratic	0.5	2	PELT	-0.425467	0.300249	-0.0203984	0.0016588	-0.11358	0.0140708	-2.88095	8.50952	0.439855	0.516968
30–50	Quadratic	0.5	2	PR	0.254797	0.756471	0.0564676	0.0282047	0.0542765	0.0277839	-2.84286	8.38571	0.459472	0.503904
30–50	Quadratic	1	0.33	ARIMA	-0.457703	2.19432	0.0179731	0.178849	-0.138824	0.0883575	-2.84286	8.22381	0.435307	0.425022
30–50	Quadratic	1	0.33	FLSA	-0.509001	0.5703	-0.0298288	0.017169	-0.102864	0.0329026	-1.57143	3.75238	0.621431	0.754101
30–50	Quadratic	1	0.33	GAM	0.315058	0.818074	0.105654	0.0693204	0.0811495	0.0461051	-1.96667	3.91905	0.553377	0.716152
30–50	Quadratic	1	0.33	LOWESS	0.39244	0.609649	0.101412	0.0472872	0.0896254	0.0331534	-1.94762	3.88095	0.548378	0.736955
30–50	Quadratic	1	0.33	MA	1.20756	1.80172	0.0617776	0.0115714	0.014345	0.00737641	-1.95714	3.95714	0.530412	0.742031
30–50	Quadratic	1	0.33	PELT	-0.783406	1.14504	-0.0758443	0.0262575	-0.218323	0.0551729	-2.79524	8.19524	0.366546	0.497593
30–50	Quadratic	1	0.33	PR	0.318815	1.82029	0.119402	0.143746	0.0611904	0.0593783	-2.86667	8.41905	0.417215	0.441598
30–50	Quadratic	1	0.66	ARIMA	-0.414038	1.72487	0.0019018	0.0779351	-0.126568	0.0741646	-2.78095	7.92381	0.459188	0.480552
30–50	Quadratic	1	0.66	FLSA	-0.561206	0.528097	-0.05261	0.00959807	-0.122041	0.0291733	-1.42381	3.3	0.616905	0.783949
30–50	Quadratic	1	0.66	GAM	0.156754	0.609123	0.0582205	0.0394821	0.04066	0.0322631	-1.99048	3.97143	0.604761	0.735193
30–50	Quadratic	1	0.66	LOWESS	0.186154	0.389979	0.0459671	0.0246375	0.0394762	0.0206092	-1.97143	3.91429	0.612266	0.754291
30–50	Quadratic	1	0.66	MA	0.791664	0.864421	0.00221271	0.00409691	-0.0365071	0.00653368	-1.98095	3.97143	0.581365	0.759498
30–50	Quadratic	1	0.66	PELT	-0.81951	1.04737	-0.0745322	0.022814	-0.214441	0.0557068	-2.84286	8.30952	0.360147	0.493593
30–50	Quadratic	1	0.66	PR	0.171254	1.4706	0.0714593	0.0826103	0.0207361	0.0459006	-2.80476	8.16667	0.474506	0.482508
30–50	Quadratic	1	1	ARIMA	-0.364822	1.60705	0.000635002	0.0633871	-0.117559	0.069087	-2.73333	7.71429	0.473543	0.499103
30–50	Quadratic	1	1	FLSA	-0.567547	0.507855	-0.052814	0.0111829	-0.121456	0.0287818	-1.32381	3	0.630499	0.800142
30–50	Quadratic	1	1	GAM	0.0996699	0.553411	0.0426408	0.0315555	0.0252205	0.0290124	-1.98571	3.95714	0.625536	0.741518
30–50	Quadratic	1	1	LOWESS	0.123313	0.342041	0.0290159	0.0189844	0.022344	0.0175016	-1.9619	3.89524	0.635969	0.760003
30–50	Quadratic	1	1	MA	0.607836	0.56247	-0.0188657	0.00319022	-0.0569144	0.00758681	-1.99524	4.00476	0.578047	0.762196
30–50	Quadratic	1	1	PELT	-0.889555	1.01466	-0.0890306	0.0187146	-0.225262	0.0570128	-2.88095	8.49048	0.341543	0.485266
30–50	Quadratic	1	1	PR	0.117019	1.32004	0.0551208	0.068743	0.00602756	0.043548	-2.75238	8.00952	0.500532	0.497622
30–50	Quadratic	1	2	ARIMA	-0.329276	1.36179	0.00188157	0.0675447	-0.104318	0.0648924	-2.66667	7.4	0.490299	0.518669
30–50	Quadratic	1	2	FLSA	-0.576523	0.501372	-0.059842	0.0106605	-0.129686	0.027839	-1.20952	2.64762	0.637965	0.819997
30–50	Quadratic	1	2	GAM	0.0567123	0.486256	0.0300393	0.0246382	0.0138344	0.0260336	-1.97619	3.95714	0.642746	0.746785
30–50	Quadratic	1	2	LOWESS	0.0542759	0.288812	0.0117832	0.0140215	0.00323075	0.0148635	-1.98571	3.95714	0.656232	0.760872
30–50	Quadratic	1	2	MA	0.40653	0.315116	-0.0390467	0.0040441	-0.078789	0.00991452	-2	4	0.574999	0.764648
30–50	Quadratic	1	2	PELT	-0.881978	0.99727	-0.0777157	0.0267177	-0.218852	0.0575807	-2.86667	8.45714	0.350445	0.484478
30–50	Quadratic	1	2	PR	0.100939	1.09015	0.0527689	0.0528003	0.00895329	0.0440798	-2.66667	7.61905	0.515881	0.525231
30–50	Quadratic	2	0.33	ARIMA	-0.888351	4.83731	-0.104198	0.528443	-0.255856	0.226254	-2.70952	7.56667	0.345885	0.285312
30–50	Quadratic	2	0.33	FLSA	-1.24959	2.01571	-0.266898	0.131336	-0.263404	0.106831	-1.18571	2.58571	0.426336	0.703594
30–50	Quadratic	2	0.33	GAM	0.00438	1.19052	0.021365	0.168184	-0.000546785	0.0620861	-1.97619	3.9381	0.658116	0.668821
30–50	Quadratic	2	0.33	LOWESS	-0.0686671	0.717728	-0.0432467	0.096851	-0.0304826	0.0385943	-1.9619	3.89524	0.629375	0.715346
30–50	Quadratic	2	0.33	MA	0.254438	0.395555	-0.244897	0.0712925	-0.201172	0.0499454	-1.98571	3.97619	0.440786	0.71674
30–50	Quadratic	2	0.33	PELT	-1.59279	3.81525	-0.297266	0.274483	-0.412369	0.215016	-2.71905	7.83333	0.192068	0.348299
30–50	Quadratic	2	0.33	PR	0.093029	2.95279	0.06939	0.352491	-0.0184447	0.104122	-2.6619	7.5	0.504746	0.396445
30–50	Quadratic	2	0.66	ARIMA	-0.739602	3.97411	-0.0999933	0.372568	-0.219217	0.194949	-2.6	7.06667	0.383443	0.362726
30–50	Quadratic	2	0.66	FLSA	-1.39988	2.30284	-0.317288	0.132478	-0.312508	0.122849	-1.37143	3.10476	0.355822	0.662723
30–50	Quadratic	2	0.66	GAM	-0.0434076	0.900198	-0.023681	0.117494	-0.0232936	0.0461271	-1.99524	3.98571	0.639988	0.696453
30–50	Quadratic	2	0.66	LOWESS	-0.156383	0.594201	-0.088691	0.0766773	-0.0580255	0.0318572	-1.94762	3.87143	0.587958	0.72931
30–50	Quadratic	2	0.66	MA	-0.124696	0.36304	-0.281582	0.140625	-0.237618	0.0753508	-1.96667	3.91905	0.422455	0.68247
30–50	Quadratic	2	0.66	PELT	-1.51319	3.41644	-0.262152	0.234119	-0.386002	0.199624	-2.7	7.70952	0.215137	0.373809
30–50	Quadratic	2	0.66	PR	0.143238	2.23517	0.0577505	0.243069	-0.00503959	0.0857784	-2.44762	6.64762	0.547319	0.484109
30–50	Quadratic	2	1	ARIMA	-0.594956	3.33992	-0.0912591	0.331003	-0.188789	0.171478	-2.5	6.58571	0.421024	0.410586
30–50	Quadratic	2	1	FLSA	-1.37601	2.18377	-0.320833	0.124452	-0.30601	0.114524	-1.20952	2.66667	0.375531	0.693397
30–50	Quadratic	2	1	GAM	-0.0331267	0.777083	-0.0325168	0.100254	-0.0280015	0.0405858	-1.99524	3.98571	0.633958	0.707286
30–50	Quadratic	2	1	LOWESS	-0.189177	0.537166	-0.106213	0.0698311	-0.0687561	0.0295478	-1.9619	3.91429	0.569342	0.731611
30–50	Quadratic	2	1	MA	-0.24336	0.489512	-0.280176	0.159044	-0.241256	0.0853154	-1.9619	3.89524	0.414285	0.669838
30–50	Quadratic	2	1	PELT	-1.54311	3.366	-0.268494	0.226774	-0.382442	0.196483	-2.69048	7.64286	0.213492	0.380321
30–50	Quadratic	2	1	PR	0.133197	1.92033	0.0469134	0.208511	-0.00590661	0.0787709	-2.3381	6.21429	0.571486	0.522671
30–50	Quadratic	2	2	ARIMA	-0.37517	2.71516	-0.0752296	0.247017	-0.145987	0.139416	-2.39524	6.0619	0.474729	0.47867
30–50	Quadratic	2	2	FLSA	-1.41045	2.30679	-0.323771	0.130467	-0.318787	0.124792	-1.24762	2.93333	0.362495	0.66993
30–50	Quadratic	2	2	GAM	0.00201832	0.644367	-0.0351863	0.0830026	-0.0266723	0.034938	-1.99524	3.98571	0.635783	0.718426
30–50	Quadratic	2	2	LOWESS	-0.18423	0.479561	-0.115066	0.0614716	-0.0750232	0.0271798	-1.9619	3.91429	0.562541	0.73674
30–50	Quadratic	2	2	MA	-0.361783	0.796249	-0.267161	0.20101	-0.242361	0.0984253	-1.97143	3.93333	0.410183	0.64255
30–50	Quadratic	2	2	PELT	-1.49164	3.08701	-0.252435	0.201111	-0.36315	0.184508	-2.61905	7.34286	0.233083	0.407908
30–50	Quadratic	2	2	PR	0.246757	1.5326	0.0540249	0.158318	0.012456	0.063915	-2.14762	5.31905	0.58666	0.595408
30–50	Recurrent	0.25	0.33	ARIMA	0.188473	1.57009	0.0853128	0.122096	-0.0148295	0.0578909	-2.87619	8.38095	0.456466	0.45323
30–50	Recurrent	0.25	0.33	FLSA	0.219979	0.345144	0.0527424	0.016886	0.0190603	0.0203622	-1.62857	4.0381	0.669572	0.75096
30–50	Recurrent	0.25	0.33	GAM	0.994259	1.65844	0.175593	0.0797461	0.204404	0.0782017	-1.98095	3.94286	0.41577	0.677387
30–50	Recurrent	0.25	0.33	LOWESS	1.02725	1.44521	0.166987	0.0552862	0.209166	0.0669312	-1.9381	3.81429	0.419958	0.701965
30–50	Recurrent	0.25	0.33	MA	1.97899	4.21949	0.160732	0.0347074	0.161703	0.0351992	-1.99048	3.98095	0.361877	0.676061
30–50	Recurrent	0.25	0.33	PELT	0.0405869	0.655238	0.0340436	0.0312323	-0.0688545	0.0147704	-2.76667	8.01429	0.492431	0.530052
30–50	Recurrent	0.25	0.33	PR	0.961958	2.09063	0.165795	0.10613	0.186314	0.0744663	-2.91905	8.64286	0.313184	0.432436
30–50	Recurrent	0.25	0.66	ARIMA	0.123367	1.01443	0.0511202	0.0453238	-0.0275991	0.0383002	-2.86667	8.33333	0.476273	0.493719
30–50	Recurrent	0.25	0.66	FLSA	0.14638	0.210416	0.0322381	0.0072037	0.00517558	0.0145025	-1.65238	4.12857	0.690385	0.75523
30–50	Recurrent	0.25	0.66	GAM	0.733143	0.977707	0.106158	0.0324018	0.140081	0.0437255	-1.98095	3.95238	0.49217	0.724842
30–50	Recurrent	0.25	0.66	LOWESS	0.775282	0.861468	0.100624	0.0220066	0.14613	0.036155	-1.95714	3.88095	0.491807	0.738783
30–50	Recurrent	0.25	0.66	MA	1.52351	2.53469	0.0945275	0.0128181	0.104087	0.0164479	-1.98095	3.95238	0.447835	0.723851
30–50	Recurrent	0.25	0.66	PELT	-0.0356409	0.454625	0.0179344	0.0164544	-0.0713786	0.0161426	-2.8	8.19048	0.49509	0.526879
30–50	Recurrent	0.25	0.66	PR	0.79623	1.70403	0.117773	0.0586777	0.13529	0.0483226	-2.8619	8.42381	0.366324	0.472947
30–50	Recurrent	0.25	1	ARIMA	0.116406	0.947815	0.0447175	0.0398254	-0.0295296	0.0344288	-2.85238	8.27143	0.481802	0.501184
30–50	Recurrent	0.25	1	FLSA	0.109503	0.15769	0.0218729	0.00355452	-0.00653433	0.010549	-1.61429	4.04286	0.705073	0.764596
30–50	Recurrent	0.25	1	GAM	0.632015	0.760704	0.0826961	0.0208048	0.114832	0.0327776	-1.99048	3.97143	0.520622	0.738273
30–50	Recurrent	0.25	1	LOWESS	0.681825	0.679801	0.0787572	0.0142505	0.121604	0.026574	-1.95714	3.9	0.519986	0.749627
30–50	Recurrent	0.25	1	MA	1.32101	1.93068	0.0715693	0.00759605	0.080857	0.0108714	-1.97143	3.93333	0.485392	0.740077
30–50	Recurrent	0.25	1	PELT	-0.162047	0.158261	-0.00325964	0.00415465	-0.0885482	0.0115413	-2.89524	8.55238	0.473018	0.516533
30–50	Recurrent	0.25	1	PR	0.652829	1.16623	0.0920438	0.0411174	0.110712	0.0393675	-2.84762	8.4	0.396781	0.489386
30–50	Recurrent	0.25	2	ARIMA	0.0527742	0.660203	0.0345248	0.0407248	-0.0374661	0.0305493	-2.8381	8.25714	0.491081	0.506618
30–50	Recurrent	0.25	2	FLSA	0.0240403	0.101928	0.00688111	0.00110502	-0.0306955	0.00745665	-1.74286	4.48571	0.688488	0.743981
30–50	Recurrent	0.25	2	GAM	0.529325	0.562785	0.0600301	0.0118621	0.0888852	0.0227632	-1.99524	3.98571	0.550525	0.750256
30–50	Recurrent	0.25	2	LOWESS	0.571655	0.491405	0.0556652	0.00797985	0.0927729	0.0173917	-1.97143	3.93333	0.550754	0.759098
30–50	Recurrent	0.25	2	MA	1.10847	1.38098	0.049533	0.0038865	0.055646	0.00632891	-1.99048	3.99048	0.521634	0.750242
30–50	Recurrent	0.25	2	PELT	-0.164689	0.130171	-0.00441188	0.0032047	-0.086061	0.012059	-2.84762	8.45714	0.480425	0.522137
30–50	Recurrent	0.25	2	PR	0.524144	0.821808	0.0623442	0.0207028	0.079738	0.0263159	-2.8619	8.42381	0.427412	0.504184
30–50	Recurrent	0.5	0.33	ARIMA	0.0768652	1.96826	0.076688	0.15508	-0.0854258	0.0832457	-2.8381	8.2	0.45081	0.437558
30–50	Recurrent	0.5	0.33	FLSA	-0.00967168	0.288123	0.0111276	0.0122642	-0.0670749	0.0250864	-1.60952	3.99048	0.691031	0.752781
30–50	Recurrent	0.5	0.33	GAM	0.811912	1.39161	0.14876	0.0754168	0.120182	0.054363	-1.99524	3.98571	0.473057	0.696305
30–50	Recurrent	0.5	0.33	LOWESS	0.847616	1.16675	0.141378	0.0537023	0.126301	0.0424995	-1.97143	3.92381	0.474273	0.717528
30–50	Recurrent	0.5	0.33	MA	1.75084	3.35804	0.121647	0.0246306	0.0706879	0.0147401	-1.99524	3.98571	0.430853	0.706325
30–50	Recurrent	0.5	0.33	PELT	-0.166057	0.862674	-0.00802618	0.0312595	-0.167114	0.0373183	-2.74286	7.93333	0.4644	0.521314
30–50	Recurrent	0.5	0.33	PR	0.839781	2.15812	0.15881	0.124881	0.112949	0.0615321	-2.89048	8.52857	0.348369	0.437352
30–50	Recurrent	0.5	0.66	ARIMA	0.1106	1.5332	0.0512244	0.0725116	-0.0798122	0.0648525	-2.78095	7.91429	0.472551	0.489114
30–50	Recurrent	0.5	0.66	FLSA	-0.0439117	0.207073	-0.00383714	0.00725318	-0.0764572	0.020953	-1.43333	3.41429	0.714491	0.789768
30–50	Recurrent	0.5	0.66	GAM	0.554829	0.799013	0.0773405	0.0296532	0.0579904	0.0305238	-1.99524	3.98571	0.55336	0.73562
30–50	Recurrent	0.5	0.66	LOWESS	0.622858	0.69897	0.0753394	0.0208505	0.0669989	0.0216684	-1.94286	3.85714	0.552401	0.752827
30–50	Recurrent	0.5	0.66	MA	1.31074	1.90946	0.0567244	0.00745313	0.0168248	0.00669769	-1.97619	3.94762	0.520247	0.742526
30–50	Recurrent	0.5	0.66	PELT	-0.282221	0.56417	-0.0298037	0.0130752	-0.176048	0.0371498	-2.81429	8.24286	0.432562	0.514105
30–50	Recurrent	0.5	0.66	PR	0.599352	1.37211	0.0903276	0.0566816	0.0559277	0.0388587	-2.8619	8.42381	0.416827	0.481336
30–50	Recurrent	0.5	1	ARIMA	0.118553	1.37175	0.0444732	0.0810803	-0.0774034	0.0602466	-2.74762	7.75714	0.481526	0.49851
30–50	Recurrent	0.5	1	FLSA	-0.138497	0.185956	-0.0209137	0.00503514	-0.100948	0.0228886	-1.5619	3.74286	0.663909	0.771663
30–50	Recurrent	0.5	1	GAM	0.461573	0.620116	0.0532935	0.0188986	0.034174	0.0233383	-1.99524	3.98571	0.583612	0.746704
30–50	Recurrent	0.5	1	LOWESS	0.521911	0.5318	0.0502394	0.0131004	0.0406259	0.0157016	-1.95238	3.86667	0.583633	0.76155
30–50	Recurrent	0.5	1	MA	1.11012	1.40929	0.0338392	0.00404066	-0.00488826	0.00530753	-1.97619	3.94762	0.553374	0.752718
30–50	Recurrent	0.5	1	PELT	-0.404318	0.318991	-0.0503591	0.00516999	-0.190234	0.0379312	-2.90476	8.57143	0.397564	0.501471
30–50	Recurrent	0.5	1	PR	0.509216	1.11704	0.0673837	0.0394474	0.0352476	0.0321073	-2.83333	8.32857	0.445156	0.497475
30–50	Recurrent	0.5	2	ARIMA	0.00481603	0.949646	0.0204585	0.052967	-0.0935884	0.0522724	-2.74286	7.78095	0.496803	0.514455
30–50	Recurrent	0.5	2	FLSA	-0.120362	0.162521	-0.0216269	0.00480609	-0.0991324	0.0210894	-1.41429	3.42381	0.68874	0.790697
30–50	Recurrent	0.5	2	GAM	0.380777	0.453207	0.0309096	0.0108242	0.0132842	0.0166778	-1.99524	3.98571	0.61137	0.756453
30–50	Recurrent	0.5	2	LOWESS	0.423675	0.388064	0.027587	0.0078243	0.0139773	0.0112248	-1.95238	3.91429	0.615747	0.766036
30–50	Recurrent	0.5	2	MA	0.89983	0.95757	0.0102647	0.00181942	-0.03088	0.00505923	-1.98095	3.9619	0.570495	0.760215
30–50	Recurrent	0.5	2	PELT	-0.391117	0.29922	-0.0450065	0.00774985	-0.181624	0.0387165	-2.84286	8.39524	0.412257	0.509918
30–50	Recurrent	0.5	2	PR	0.376199	0.776738	0.0366429	0.0234417	0.00559463	0.0238576	-2.83333	8.36667	0.480045	0.50799
30–50	Recurrent	1	0.33	ARIMA	-0.12294	2.8159	-0.0164472	0.300342	-0.21925	0.1643	-2.75714	7.78571	0.442232	0.374431
30–50	Recurrent	1	0.33	FLSA	-0.434737	0.547057	-0.142122	0.0453779	-0.231885	0.0847285	-1.50476	3.61905	0.524132	0.717527
30–50	Recurrent	1	0.33	GAM	0.519374	1.22469	0.035114	0.080125	-0.0285686	0.0531541	-1.99048	3.97143	0.591116	0.699037
30–50	Recurrent	1	0.33	LOWESS	0.623488	1.03816	0.0341565	0.06017	-0.0165842	0.0349758	-1.99048	3.97143	0.587981	0.720049
30–50	Recurrent	1	0.33	MA	1.2985	1.99064	-0.0361831	0.0151768	-0.0996252	0.023336	-1.97143	3.9619	0.494035	0.726867
30–50	Recurrent	1	0.33	PELT	-0.68182	1.21016	-0.183328	0.0771926	-0.360634	0.144315	-2.77619	8.01429	0.287477	0.449821
30–50	Recurrent	1	0.33	PR	0.56184	2.03399	0.057763	0.157831	-0.0325577	0.06884	-2.87143	8.45238	0.441735	0.429634
30–50	Recurrent	1	0.66	ARIMA	-0.0838701	2.38266	-0.0364847	0.23147	-0.211092	0.146019	-2.7	7.50952	0.446615	0.417378
30–50	Recurrent	1	0.66	FLSA	-0.515333	0.492428	-0.178374	0.0414783	-0.265207	0.0878519	-1.49048	3.51905	0.488223	0.722552
30–50	Recurrent	1	0.66	GAM	0.36626	0.812456	-0.0273457	0.0451341	-0.0678282	0.0415296	-1.99524	3.98571	0.589938	0.723263
30–50	Recurrent	1	0.66	LOWESS	0.428297	0.659054	-0.0348782	0.0329155	-0.0700028	0.0297313	-1.97143	3.94286	0.583379	0.739664
30–50	Recurrent	1	0.66	MA	0.837107	0.889015	-0.105958	0.0174217	-0.149802	0.0317385	-1.98571	3.97619	0.479091	0.737694
30–50	Recurrent	1	0.66	PELT	-0.721225	1.16308	-0.185614	0.0697435	-0.358927	0.143597	-2.79048	8.14286	0.28331	0.446676
30–50	Recurrent	1	0.66	PR	0.440017	1.57784	0.00260951	0.104433	-0.0644915	0.0578196	-2.80476	8.24286	0.476367	0.465532
30–50	Recurrent	1	1	ARIMA	-0.0900649	2.11731	-0.0487935	0.181121	-0.208876	0.137097	-2.66667	7.37143	0.445898	0.444373
30–50	Recurrent	1	1	FLSA	-0.48352	0.452203	-0.176945	0.0397285	-0.256381	0.080841	-1.3	2.97619	0.519647	0.756311
30–50	Recurrent	1	1	GAM	0.302027	0.663796	-0.050623	0.0368572	-0.0848134	0.0384102	-1.98571	3.96667	0.577622	0.731308
30–50	Recurrent	1	1	LOWESS	0.355841	0.534709	-0.0588978	0.0277073	-0.0895733	0.0294903	-1.96667	3.95714	0.569656	0.742719
30–50	Recurrent	1	1	MA	0.664263	0.602293	-0.130038	0.0211681	-0.169813	0.0366968	-1.96667	3.91905	0.476568	0.740889
30–50	Recurrent	1	1	PELT	-0.789092	1.01863	-0.202839	0.0654378	-0.36914	0.146971	-2.84762	8.30476	0.264138	0.44028
30–50	Recurrent	1	1	PR	0.423023	1.36173	-0.0145312	0.0790571	-0.0710231	0.0508499	-2.73333	8.00952	0.47989	0.490649
30–50	Recurrent	1	2	ARIMA	0.0306082	1.65632	-0.0661115	0.103021	-0.187836	0.108949	-2.5381	6.79524	0.467967	0.512665
30–50	Recurrent	1	2	FLSA	-0.470971	0.40833	-0.181992	0.0386213	-0.26268	0.0803273	-1.2	2.73333	0.528291	0.770207
30–50	Recurrent	1	2	GAM	0.237198	0.504932	-0.0764776	0.0300971	-0.103101	0.0346283	-1.95714	3.9381	0.566424	0.740034
30–50	Recurrent	1	2	LOWESS	0.300113	0.457559	-0.0798491	0.0255114	-0.108708	0.0295889	-1.91905	3.89048	0.562658	0.748171
30–50	Recurrent	1	2	MA	0.464937	0.370161	-0.148413	0.0308336	-0.187085	0.0435467	-1.95238	3.89524	0.478974	0.738303
30–50	Recurrent	1	2	PELT	-0.742385	0.937265	-0.192522	0.0627263	-0.353251	0.140582	-2.7381	7.96667	0.287	0.460916
30–50	Recurrent	1	2	PR	0.395904	1.18498	-0.0285193	0.0720439	-0.0783736	0.047408	-2.63333	7.67143	0.48704	0.513885
30–50	Recurrent	2	0.33	ARIMA	0.323111	6.65121	-0.232604	1.26227	-0.326489	0.375275	-2.44286	6.36667	0.339093	0.124118
30–50	Recurrent	2	0.33	FLSA	-1.13451	1.86188	-0.780418	0.681168	-0.550916	0.348093	-1.24286	2.82381	0.168163	0.408563
30–50	Recurrent	2	0.33	GAM	0.436409	1.7848	-0.367333	0.395799	-0.223294	0.126655	-1.99048	3.98095	0.365465	0.553403
30–50	Recurrent	2	0.33	LOWESS	0.565829	1.49488	-0.383826	0.337221	-0.236298	0.10887	-1.96667	3.92857	0.34935	0.586707
30–50	Recurrent	2	0.33	MA	0.494886	0.716849	-0.656006	0.521062	-0.396195	0.188428	-1.94762	3.8619	0.205102	0.504885
30–50	Recurrent	2	0.33	PELT	-1.34783	3.46877	-0.76238	0.834124	-0.689551	0.529061	-2.6381	7.45714	0.0469479	0.146289
30–50	Recurrent	2	0.33	PR	0.532274	2.71136	-0.301221	0.535042	-0.198886	0.140843	-2.71905	7.9381	0.300331	0.314742
30–50	Recurrent	2	0.66	ARIMA	0.517044	4.54861	-0.287724	0.762829	-0.27905	0.267634	-2.28095	5.52857	0.339594	0.297622
30–50	Recurrent	2	0.66	FLSA	-1.14687	1.8254	-0.799767	0.690909	-0.560164	0.349657	-1.12381	2.46667	0.169466	0.419166
30–50	Recurrent	2	0.66	GAM	0.461982	1.34891	-0.402314	0.346311	-0.229347	0.10919	-1.9619	3.92381	0.35048	0.586191
30–50	Recurrent	2	0.66	LOWESS	0.510381	1.11784	-0.442397	0.315053	-0.260004	0.105027	-1.94286	3.91429	0.323688	0.601401
30–50	Recurrent	2	0.66	MA	0.095169	0.630738	-0.702496	0.660259	-0.427449	0.221937	-1.92381	3.84762	0.199748	0.452484
30–50	Recurrent	2	0.66	PELT	-1.16164	3.08256	-0.696092	0.741856	-0.645056	0.482687	-2.52381	6.97143	0.0768875	0.190974
30–50	Recurrent	2	0.66	PR	0.564035	2.42277	-0.329759	0.483157	-0.203217	0.125122	-2.52381	7.28571	0.310671	0.367081
30–50	Recurrent	2	1	ARIMA	0.707718	4.08693	-0.257066	0.630455	-0.233524	0.217375	-2.14286	5.17143	0.372224	0.36712
30–50	Recurrent	2	1	FLSA	-1.17366	1.86437	-0.81319	0.711872	-0.570353	0.358976	-1.15238	2.5619	0.160063	0.405599
30–50	Recurrent	2	1	GAM	0.470717	1.18299	-0.415558	0.332023	-0.233426	0.105006	-1.91429	3.85714	0.349134	0.598364
30–50	Recurrent	2	1	LOWESS	0.514481	0.998034	-0.456529	0.308356	-0.265499	0.10274	-1.90476	3.8381	0.32069	0.610179
30–50	Recurrent	2	1	MA	0.0857446	1.18526	-0.636591	0.818016	-0.406076	0.240311	-1.88571	3.75238	0.234835	0.401117
30–50	Recurrent	2	1	PELT	-1.25078	2.9887	-0.717882	0.756461	-0.650027	0.489661	-2.5619	7.11429	0.0668396	0.182937
30–50	Recurrent	2	1	PR	0.659033	2.50653	-0.290804	0.487796	-0.184101	0.120366	-2.31429	6.65714	0.355335	0.39627
30–50	Recurrent	2	2	ARIMA	0.869977	3.28963	-0.245446	0.472429	-0.19189	0.163547	-2.04762	4.70476	0.392596	0.460575
30–50	Recurrent	2	2	FLSA	-1.18636	1.8145	-0.824406	0.715024	-0.573847	0.360619	-1.1381	2.51905	0.156884	0.40624
30–50	Recurrent	2	2	GAM	0.514882	1.05686	-0.406244	0.305127	-0.224928	0.0983774	-1.84762	3.72381	0.361778	0.618535
30–50	Recurrent	2	2	LOWESS	0.544478	0.878135	-0.462571	0.290716	-0.26417	0.0975296	-1.88095	3.77619	0.319826	0.623279
30–50	Recurrent	2	2	MA	-0.0231303	1.30254	-0.639914	0.806799	-0.412071	0.248151	-1.91429	3.81905	0.231514	0.396264
30–50	Recurrent	2	2	PELT	-1.07667	2.56399	-0.668983	0.674411	-0.603116	0.438116	-2.3619	6.45714	0.10315	0.237987
30–50	Recurrent	2	2	PR	0.767507	2.40865	-0.275248	0.402191	-0.164739	0.102955	-2.07143	5.85238	0.393383	0.466967
51–100	No change	0	0.33	ARIMA	0.42697	1.36141	0.0603644	0.034703	0.0717474	0.0379898	0.15	0.15	0.841336	0.920011
51–100	No change	0	0.33	FLSA	0.466526	0.331818	0.0468743	0.00427063	0.140375	0.0273891	1.83	4.33	0.562605	0.734787
51–100	No change	0	0.33	GAM	0.726288	0.662914	0.0580339	0.00742146	0.178944	0.0407314	1	1	0.62473	0.89568
51–100	No change	0	0.33	LOWESS	0.853221	0.840973	0.0738783	0.00960944	0.201665	0.0469415	1.03	1.09	0.588321	0.881709
51–100	No change	0	0.33	MA	2.89098	8.7497	0.171185	0.0315948	0.234041	0.0561799	1.01	1.03	0.334312	0.715757
51–100	No change	0	0.33	PELT	0.167172	0.500464	0.0117251	0.00319033	0.00690079	0.00120308	0.14	0.28	0.943953	0.972039
51–100	No change	0	0.33	PR	0.644219	0.568457	0.0496675	0.0066486	0.163423	0.0366628	0	0	0.779373	0.954238
51–100	No change	0	0.66	ARIMA	0.168981	0.378054	0.017071	0.00425661	0.0283687	0.0104879	0.08	0.08	0.936074	0.97724
51–100	No change	0	0.66	FLSA	0.315257	0.168299	0.0248431	0.0014415	0.0945447	0.0142675	1.69	4.07	0.628998	0.76113
51–100	No change	0	0.66	GAM	0.579056	0.422935	0.0366889	0.00295157	0.140159	0.0251191	1.02	1.08	0.668919	0.910273
51–100	No change	0	0.66	LOWESS	0.689001	0.546525	0.0474187	0.00391421	0.161114	0.0299489	1.06	1.26	0.635298	0.893979
51–100	No change	0	0.66	MA	2.30633	5.57226	0.109369	0.0130261	0.186412	0.0357916	1	1	0.436143	0.801036
51–100	No change	0	0.66	PELT	0.0311301	0.0382797	0.0013955	0.000104286	0.00155011	0.000129109	0.04	0.06	0.987386	0.99572
51–100	No change	0	0.66	PR	0.474741	0.321961	0.0281502	0.00241349	0.120442	0.0207746	0	0	0.840358	0.974483
51–100	No change	0	1	ARIMA	0.0984901	0.209793	0.0101022	0.00258677	0.0171129	0.00622763	0.05	0.05	0.961483	0.986612
51–100	No change	0	1	FLSA	0.292225	0.149092	0.0207992	0.00116569	0.088581	0.0124439	1.84	4.48	0.613581	0.740291
51–100	No change	0	1	GAM	0.517207	0.338783	0.0292748	0.00184901	0.124467	0.0198464	1.01	1.03	0.689243	0.919282
51–100	No change	0	1	LOWESS	0.618824	0.439809	0.0377546	0.002424	0.144394	0.024042	1.04	1.12	0.659058	0.908828
51–100	No change	0	1	MA	2.06452	4.47683	0.0881375	0.00855333	0.166819	0.0287469	1	1	0.478642	0.829688
51–100	No change	0	1	PELT	0.097691	0.193441	0.00629857	0.000885752	0.00390916	0.000352219	0.07	0.09	0.969376	0.990366
51–100	No change	0	1	PR	0.398676	0.235064	0.0205613	0.00139606	0.101151	0.0151718	0	0	0.867126	0.98148
51–100	No change	0	2	ARIMA	0.0854354	0.193197	0.00800241	0.00197437	0.0135893	0.00495644	0.04	0.04	0.968369	0.988806
51–100	No change	0	2	FLSA	0.251468	0.100756	0.0145558	0.000515972	0.0775673	0.00902653	1.98	5.02	0.604327	0.713783
51–100	No change	0	2	GAM	0.448095	0.257752	0.0220007	0.000985645	0.10641	0.0147143	1.03	1.09	0.707518	0.922076
51–100	No change	0	2	LOWESS	0.540042	0.340342	0.0282039	0.00133548	0.125143	0.0181642	1.07	1.27	0.678469	0.907759
51–100	No change	0	2	MA	1.79445	3.41242	0.0670059	0.00506464	0.144422	0.0216828	1	1	0.526715	0.857534
51–100	No change	0	2	PELT	0.0219165	0.017661	0.000450491	8.41309e-06	0.000586314	1.21935e-05	0.03	0.03	0.991447	0.99795
51–100	No change	0	2	PR	0.302249	0.147032	0.0128695	0.000625029	0.0766958	0.00949406	0	0	0.900371	0.988491
51–100	Jump	0.25	0.33	ARIMA	-0.139646	0.340559	0.000403486	0.00417398	-0.0426648	0.00899101	-0.96	0.96	0.799449	0.931179
51–100	Jump	0.25	0.33	FLSA	0.0410779	0.105363	0.0127758	0.00223446	0.0122356	0.00665155	0.34	1.26	0.923204	0.92186
51–100	Jump	0.25	0.33	GAM	0.512053	0.470827	0.0565938	0.00748332	0.124922	0.0280722	0.04	0.04	0.813409	0.961293
51–100	Jump	0.25	0.33	LOWESS	0.61793	0.538042	0.0671041	0.00868215	0.141091	0.0287963	0.09	0.11	0.777496	0.955137
51–100	Jump	0.25	0.33	MA	2.72016	7.88983	0.166254	0.0312413	0.175265	0.0326106	0	0	0.469409	0.797836
51–100	Jump	0.25	0.33	PELT	-0.137054	0.368048	-0.00249938	0.00276668	-0.0534006	0.00419568	-0.92	1	0.798713	0.932817
51–100	Jump	0.25	0.33	PR	0.381	0.352437	0.0414658	0.00590379	0.10068	0.0236863	-1	1	0.712899	0.916205
51–100	Jump	0.25	0.66	ARIMA	-0.109462	0.296843	0.000696004	0.00236763	-0.0370268	0.00846533	-0.93	0.93	0.810731	0.934706
51–100	Jump	0.25	0.66	FLSA	0.012521	0.114574	0.00836398	0.0013254	-0.00169524	0.00480674	0.37	1.47	0.931033	0.91187
51–100	Jump	0.25	0.66	GAM	0.433213	0.342652	0.0412336	0.00395613	0.102718	0.0193959	0.04	0.04	0.845683	0.972578
51–100	Jump	0.25	0.66	LOWESS	0.512352	0.367989	0.0468775	0.00436476	0.115585	0.0190876	0.07	0.13	0.819915	0.967304
51–100	Jump	0.25	0.66	MA	2.11472	4.76827	0.103987	0.0122252	0.132661	0.0188972	0	0	0.590897	0.879974
51–100	Jump	0.25	0.66	PELT	-0.196782	0.124371	-0.00802373	0.000523618	-0.0557908	0.00351328	-0.92	0.98	0.787729	0.94004
51–100	Jump	0.25	0.66	PR	0.272081	0.226695	0.0257296	0.00281331	0.0730589	0.0153442	-1	1	0.748081	0.926497
51–100	Jump	0.25	1	ARIMA	-0.102712	0.241492	0.000269362	0.00171476	-0.0342139	0.00805431	-0.91	0.91	0.816567	0.937454
51–100	Jump	0.25	1	FLSA	-0.0155261	0.0786643	0.0042271	0.000703806	-0.00662544	0.00385208	0.47	1.51	0.913212	0.911313
51–100	Jump	0.25	1	GAM	0.407128	0.298146	0.035936	0.00295674	0.0947272	0.0162879	0.02	0.02	0.859932	0.9776
51–100	Jump	0.25	1	LOWESS	0.480141	0.313988	0.0399996	0.00313792	0.106989	0.0159543	0.06	0.12	0.834484	0.972056
51–100	Jump	0.25	1	MA	1.89102	3.79256	0.0844444	0.00800181	0.117384	0.014897	0	0	0.636118	0.905087
51–100	Jump	0.25	1	PELT	-0.219029	0.0968463	-0.00900656	0.000396111	-0.0570459	0.00364937	-0.97	0.97	0.776236	0.941069
51–100	Jump	0.25	1	PR	0.226505	0.183234	0.0199401	0.001962	0.0614984	0.0124407	-1	1	0.762568	0.930005
51–100	Jump	0.25	2	ARIMA	-0.177744	0.139181	-0.00551291	0.000905153	-0.0460245	0.00578061	-0.95	0.95	0.792136	0.939419
51–100	Jump	0.25	2	FLSA	-0.0765951	0.0589793	-0.000892301	0.000427825	-0.0176072	0.00347567	0.38	1.46	0.915256	0.914846
51–100	Jump	0.25	2	GAM	0.387004	0.255814	0.0308161	0.00207388	0.0874577	0.013365	0.02	0.02	0.869976	0.981297
51–100	Jump	0.25	2	LOWESS	0.441627	0.258191	0.0324556	0.00204692	0.0963754	0.0126604	0.02	0.02	0.856033	0.981865
51–100	Jump	0.25	2	MA	1.68159	3.00787	0.0649942	0.00470673	0.0985646	0.0105671	0	0	0.682708	0.926262
51–100	Jump	0.25	2	PELT	-0.195826	0.092358	-0.00816163	0.000473181	-0.0552577	0.00368961	-0.92	0.96	0.788074	0.941653
51–100	Jump	0.25	2	PR	0.174323	0.139074	0.0137964	0.00122718	0.0482583	0.0094735	-1	1	0.779013	0.933543
51–100	Jump	0.5	0.33	ARIMA	-0.104301	1.0106	0.00755596	0.0272481	-0.0514106	0.0329602	-0.85	0.85	0.811973	0.896872
51–100	Jump	0.5	0.33	FLSA	-0.0846677	0.170832	-0.00054673	0.00411915	-0.0180179	0.0104053	0.67	1.81	0.866986	0.886781
51–100	Jump	0.5	0.33	GAM	0.492117	0.543599	0.0633357	0.0127299	0.116269	0.0305242	0.01	0.01	0.822771	0.957605
51–100	Jump	0.5	0.33	LOWESS	0.55602	0.50492	0.0690875	0.0128999	0.1265	0.0274332	0.05	0.05	0.799509	0.958877
51–100	Jump	0.5	0.33	MA	2.42369	6.34635	0.135845	0.0223107	0.127962	0.0193163	0	0	0.544791	0.843796
51–100	Jump	0.5	0.33	PELT	-0.348483	0.52914	-0.0318142	0.0053646	-0.107017	0.0149271	-0.89	0.99	0.733713	0.92057
51–100	Jump	0.5	0.33	PR	0.261098	0.401171	0.0338421	0.0095298	0.0742579	0.0273929	-1	1	0.744474	0.911064
51–100	Jump	0.5	0.66	ARIMA	-0.243848	0.521087	-0.0221151	0.00506383	-0.0754189	0.0189142	-0.87	0.87	0.771499	0.924055
51–100	Jump	0.5	0.66	FLSA	-0.143663	0.166351	-0.00713976	0.00406768	-0.0307802	0.0101343	0.61	1.67	0.858272	0.894775
51–100	Jump	0.5	0.66	GAM	0.469802	0.414118	0.0489196	0.00733283	0.104531	0.0210493	0.04	0.04	0.836046	0.968577
51–100	Jump	0.5	0.66	LOWESS	0.487917	0.361978	0.0481627	0.00673935	0.105021	0.0184234	0.03	0.03	0.835193	0.972662
51–100	Jump	0.5	0.66	MA	1.87467	3.79286	0.0761556	0.00751924	0.0882872	0.0102481	0	0	0.660511	0.909239
51–100	Jump	0.5	0.66	PELT	-0.445104	0.292376	-0.0415347	0.00241131	-0.114362	0.0137644	-0.92	0.98	0.709798	0.927706
51–100	Jump	0.5	0.66	PR	0.194175	0.273403	0.0168099	0.00490607	0.0572556	0.0188226	-1	1	0.770139	0.922058
51–100	Jump	0.5	1	ARIMA	-0.286156	0.580034	-0.020045	0.0118264	-0.0817485	0.0214758	-0.9	0.9	0.759591	0.917004
51–100	Jump	0.5	1	FLSA	-0.1215	0.149736	-0.00693742	0.00347095	-0.0289621	0.00944171	0.66	1.72	0.854107	0.893082
51–100	Jump	0.5	1	GAM	0.474848	0.372938	0.0444644	0.0056909	0.0999332	0.0176914	0	0	0.846401	0.975029
51–100	Jump	0.5	1	LOWESS	0.460033	0.308975	0.0399855	0.00485476	0.0960256	0.0151473	0.01	0.01	0.851673	0.978292
51–100	Jump	0.5	1	MA	1.6621	2.98124	0.055664	0.00424519	0.0716034	0.00720213	0.01	0.01	0.705714	0.929352
51–100	Jump	0.5	1	PELT	-0.462734	0.276892	-0.0424129	0.00247866	-0.115962	0.014067	-0.97	0.97	0.699384	0.92829
51–100	Jump	0.5	1	PR	0.173394	0.221372	0.0104336	0.00356938	0.0519635	0.0153497	-1	1	0.778764	0.926354
51–100	Jump	0.5	2	ARIMA	-0.279175	0.522515	-0.0197365	0.00878688	-0.078968	0.0210064	-0.89	0.89	0.76365	0.92004
51–100	Jump	0.5	2	FLSA	-0.228979	0.130956	-0.0244834	0.00187894	-0.0540653	0.00774221	0.48	1.64	0.844952	0.899687
51–100	Jump	0.5	2	GAM	0.492421	0.336455	0.0403446	0.00410305	0.0965519	0.014575	0	0	0.848387	0.978997
51–100	Jump	0.5	2	LOWESS	0.437725	0.257906	0.0319144	0.00317878	0.0871126	0.0119472	0.01	0.01	0.864532	0.982668
51–100	Jump	0.5	2	MA	1.44047	2.23463	0.036159	0.00203603	0.0547126	0.00471266	0.01	0.01	0.753869	0.947838
51–100	Jump	0.5	2	PELT	-0.418761	0.265998	-0.0362122	0.00349452	-0.108747	0.0141293	-0.9	0.94	0.721346	0.929765
51–100	Jump	0.5	2	PR	0.154528	0.161664	0.0035454	0.00237781	0.0471445	0.0113781	-1	1	0.787222	0.931166
51–100	Jump	1	0.33	ARIMA	-0.175072	2.64653	-0.00686466	0.150321	-0.0869857	0.0943251	-0.72	1.02	0.803174	0.771296
51–100	Jump	1	0.33	FLSA	-0.33628	0.41919	-0.0758771	0.0271547	-0.0700926	0.0243037	0.88	2.14	0.7356	0.846167
51–100	Jump	1	0.33	GAM	0.643487	0.721092	0.06608	0.0277614	0.131525	0.0336336	0	0	0.793356	0.94703
51–100	Jump	1	0.33	LOWESS	0.553068	0.520461	0.0485422	0.0231697	0.116388	0.0284235	0.05	0.05	0.816208	0.954449
51–100	Jump	1	0.33	MA	1.86	3.94427	0.0161788	0.00640671	0.0419576	0.00777763	0.03	0.03	0.713532	0.907016
51–100	Jump	1	0.33	PELT	-0.82908	1.15052	-0.159418	0.0368082	-0.219557	0.0551571	-0.89	0.99	0.56322	0.865831
51–100	Jump	1	0.33	PR	0.352977	0.668338	0.00634527	0.0261334	0.0913127	0.0352828	-0.96	0.96	0.744482	0.896268
51–100	Jump	1	0.66	ARIMA	0.200901	2.85071	0.0774662	0.211527	-0.00334687	0.103135	-0.47	1.29	0.853063	0.730781
51–100	Jump	1	0.66	FLSA	-0.351164	0.434395	-0.0737748	0.0240713	-0.080739	0.0248073	0.73	1.87	0.751523	0.861031
51–100	Jump	1	0.66	GAM	0.659007	0.615383	0.0560596	0.0168069	0.119234	0.0238202	0	0	0.804166	0.961124
51–100	Jump	1	0.66	LOWESS	0.515846	0.393443	0.0277915	0.0124619	0.100378	0.0194096	0.01	0.01	0.847343	0.970405
51–100	Jump	1	0.66	MA	1.37	2.17029	-0.0399763	0.00520559	0.00821362	0.00499273	0.03	0.03	0.790001	0.9469
51–100	Jump	1	0.66	PELT	-0.80068	1.00817	-0.14638	0.0389283	-0.20939	0.0530258	-0.81	0.95	0.586875	0.871764
51–100	Jump	1	0.66	PR	0.427964	0.537423	0.00526652	0.0165488	0.102288	0.0254217	-0.88	0.88	0.74196	0.914194
51–100	Jump	1	1	ARIMA	0.317029	2.19006	0.0731303	0.0976658	0.0290387	0.0862577	-0.46	0.7	0.827739	0.816945
51–100	Jump	1	1	FLSA	-0.367782	0.414006	-0.081057	0.0227186	-0.0850514	0.0239122	0.82	1.82	0.730179	0.865227
51–100	Jump	1	1	GAM	0.676073	0.588608	0.0533323	0.0130485	0.114824	0.0205224	0	0	0.806177	0.965719
51–100	Jump	1	1	LOWESS	0.509324	0.357782	0.0215563	0.00907624	0.094941	0.0163403	0.01	0.01	0.854891	0.974883
51–100	Jump	1	1	MA	1.20564	1.79325	-0.0567102	0.00654899	-0.0028606	0.00464449	0.04	0.04	0.805663	0.954136
51–100	Jump	1	1	PELT	-0.826593	0.974056	-0.138924	0.0420102	-0.206269	0.0539613	-0.9	0.9	0.577749	0.873324
51–100	Jump	1	1	PR	0.508462	0.584609	0.0154078	0.0144426	0.110753	0.0233444	-0.8	0.8	0.73447	0.919927
51–100	Jump	1	2	ARIMA	0.752482	2.00102	0.13724	0.0819792	0.131039	0.0826159	-0.14	0.7	0.72878	0.828128
51–100	Jump	1	2	FLSA	-0.52292	0.477983	-0.115902	0.0222421	-0.122872	0.0274626	0.59	1.55	0.707959	0.875933
51–100	Jump	1	2	GAM	0.693719	0.563106	0.0500709	0.00918743	0.110878	0.0175087	0	0	0.808051	0.970084
51–100	Jump	1	2	LOWESS	0.50931	0.33196	0.0164307	0.0059568	0.0900385	0.013394	0.01	0.01	0.860712	0.97897
51–100	Jump	1	2	MA	0.939349	1.17004	-0.0760584	0.00823093	-0.0152495	0.00439985	0.09	0.13	0.814991	0.96198
51–100	Jump	1	2	PELT	-0.559066	0.87473	-0.0805196	0.0445727	-0.157141	0.0466515	-0.63	0.79	0.694771	0.886161
51–100	Jump	1	2	PR	0.626792	0.700772	0.0352536	0.0152598	0.120406	0.0227604	-0.66	0.66	0.725494	0.925339
51–100	Jump	2	0.33	ARIMA	2.29168	7.2783	0.588293	0.709394	0.376367	0.21341	0.2	1.06	0.278401	0.469108
51–100	Jump	2	0.33	FLSA	-0.992839	1.69336	-0.450651	0.317845	-0.231773	0.0939215	0.66	1.76	0.452594	0.70461
51–100	Jump	2	0.33	GAM	0.991113	1.28378	0.0358152	0.077761	0.158514	0.0408038	0	0	0.743655	0.913776
51–100	Jump	2	0.33	LOWESS	0.692523	0.715463	-0.059179	0.0688029	0.131619	0.0343357	0.12	0.12	0.773807	0.927303
51–100	Jump	2	0.33	MA	0.938618	1.41025	-0.400764	0.18315	-0.0666407	0.0179002	0.18	0.18	0.619415	0.887914
51–100	Jump	2	0.33	PELT	-0.964869	3.18255	-0.270204	0.567326	-0.271433	0.163837	-0.57	0.77	0.516439	0.610066
51–100	Jump	2	0.33	PR	0.993871	1.77918	0.0161194	0.145861	0.173912	0.049802	-0.63	0.65	0.662556	0.842281
51–100	Jump	2	0.66	ARIMA	2.00745	4.42598	0.47747	0.345663	0.36637	0.148735	0.38	1.36	0.322182	0.631159
51–100	Jump	2	0.66	FLSA	-0.985348	1.58253	-0.461799	0.308638	-0.231031	0.0864784	0.64	1.38	0.451524	0.733133
51–100	Jump	2	0.66	GAM	1.02451	1.22348	0.0345762	0.0464573	0.144014	0.0300949	0	0	0.749637	0.933792
51–100	Jump	2	0.66	LOWESS	0.715738	0.663851	-0.0630901	0.0409874	0.121326	0.0251287	0.06	0.06	0.784036	0.948114
51–100	Jump	2	0.66	MA	0.489404	0.593139	-0.446661	0.212504	-0.0813139	0.0160828	0.32	0.38	0.613536	0.885127
51–100	Jump	2	0.66	PELT	0.118439	1.18421	0.139009	0.275173	-0.0334843	0.0538968	-0.04	0.28	0.880395	0.830136
51–100	Jump	2	0.66	PR	1.27139	2.08281	0.130972	0.124183	0.168201	0.0412854	-0.23	0.33	0.635324	0.866112
51–100	Jump	2	1	ARIMA	1.84312	3.64484	0.440354	0.279133	0.353929	0.136814	0.24	0.88	0.365067	0.691884
51–100	Jump	2	1	FLSA	-0.957763	1.56249	-0.440793	0.300379	-0.225282	0.0858895	0.72	1.54	0.455203	0.728383
51–100	Jump	2	1	GAM	1.03993	1.20888	0.0348578	0.0351759	0.138232	0.0264058	0	0	0.751419	0.940764
51–100	Jump	2	1	LOWESS	0.745893	0.671723	-0.0588252	0.0309261	0.116968	0.0217962	0.02	0.02	0.790491	0.956132
51–100	Jump	2	1	MA	0.308924	0.371028	-0.466869	0.228576	-0.0895048	0.01652	0.39	0.45	0.605794	0.880059
51–100	Jump	2	1	PELT	0.281185	0.494397	0.211993	0.1809	0.0213419	0.0238493	0.03	0.19	0.831337	0.901184
51–100	Jump	2	1	PR	1.34046	2.01689	0.147026	0.0824233	0.161376	0.0347636	-0.1	0.18	0.640392	0.893176
51–100	Jump	2	2	ARIMA	1.67845	3.01235	0.402873	0.233253	0.340451	0.126695	0.33	1.45	0.390548	0.697097
51–100	Jump	2	2	FLSA	-0.993775	1.7071	-0.446934	0.293297	-0.235049	0.0959123	0.68	1.82	0.450176	0.707171
51–100	Jump	2	2	GAM	1.05494	1.19299	0.0346401	0.0234925	0.131451	0.0225989	0	0	0.754146	0.948017
51–100	Jump	2	2	LOWESS	0.785067	0.693602	-0.052596	0.0203676	0.111856	0.0181969	0.03	0.03	0.790343	0.961582
51–100	Jump	2	2	MA	0.117008	0.231713	-0.477446	0.243111	-0.0932711	0.0175482	0.39	0.45	0.61586	0.877213
51–100	Jump	2	2	PELT	0.383001	0.287	0.211575	0.112856	0.035797	0.01042	0.17	0.23	0.789357	0.935866
51–100	Jump	2	2	PR	1.33255	1.92498	0.151533	0.0729353	0.149149	0.0292462	0.01	0.17	0.657941	0.903063
51–100	Linear	0.25	0.33	ARIMA	-0.146214	0.335763	0.00214344	0.00662109	-0.070455	0.0136152	-1.96	3.88	0.626384	0.767535
51–100	Linear	0.25	0.33	FLSA	0.118038	0.120685	0.0238184	0.00276093	0.0123212	0.0104561	-0.36	1.42	0.904318	0.909543
51–100	Linear	0.25	0.33	GAM	0.63874	0.938171	0.100108	0.0315038	0.134328	0.0512727	-0.94	0.98	0.6477	0.875278
51–100	Linear	0.25	0.33	LOWESS	0.674985	0.78092	0.0844359	0.0169476	0.12654	0.0350087	-0.85	1.17	0.667656	0.886027
51–100	Linear	0.25	0.33	MA	2.72008	7.97287	0.172518	0.0334504	0.151913	0.0250606	-1	1	0.39329	0.756941
51–100	Linear	0.25	0.33	PELT	-0.212963	0.0942136	-0.00885518	0.000538366	-0.0836803	0.00844781	-1.94	3.84	0.613916	0.779182
51–100	Linear	0.25	0.33	PR	0.454529	0.873218	0.0671458	0.0350973	0.0822324	0.0339517	-1.95	3.89	0.562905	0.735502
51–100	Linear	0.25	0.66	ARIMA	-0.057574	0.330164	0.00642549	0.00375618	-0.054253	0.0133643	-1.89	3.67	0.65069	0.780171
51–100	Linear	0.25	0.66	FLSA	0.0621136	0.0678327	0.0125259	0.00126	-0.000241028	0.00685672	-0.23	1.17	0.946652	0.927708
51–100	Linear	0.25	0.66	GAM	0.463589	0.499837	0.0553222	0.00897238	0.0899501	0.0255183	-0.93	0.97	0.713468	0.912431
51–100	Linear	0.25	0.66	LOWESS	0.512868	0.423842	0.0489889	0.0053282	0.0904744	0.0175255	-0.99	0.99	0.702206	0.920546
51–100	Linear	0.25	0.66	MA	2.10143	4.78404	0.105591	0.012885	0.10427	0.0124031	-1	1	0.502355	0.835673
51–100	Linear	0.25	0.66	PELT	-0.173963	0.198521	-0.00605996	0.00130891	-0.0834031	0.00794976	-1.92	3.82	0.622022	0.778648
51–100	Linear	0.25	0.66	PR	0.292635	0.362252	0.0329301	0.00838839	0.0471823	0.0161244	-1.98	3.96	0.605093	0.760484
51–100	Linear	0.25	1	ARIMA	-0.012272	0.35994	0.0104114	0.00499146	-0.0455857	0.0142225	-1.85	3.55	0.663174	0.78522
51–100	Linear	0.25	1	FLSA	0.0307134	0.0700028	0.0092299	0.00126039	-0.00814719	0.00666116	-0.15	1.43	0.960449	0.913483
51–100	Linear	0.25	1	GAM	0.382661	0.322575	0.0377162	0.00397824	0.0696275	0.0161217	-0.93	0.97	0.742479	0.92522
51–100	Linear	0.25	1	LOWESS	0.443039	0.303812	0.0371618	0.00298735	0.0752516	0.0121582	-0.97	0.97	0.72701	0.929153
51–100	Linear	0.25	1	MA	1.88285	3.79081	0.0825887	0.00784209	0.0859729	0.00870625	-1	1	0.543488	0.859801
51–100	Linear	0.25	1	PELT	-0.178523	0.134656	-0.00710352	0.000633511	-0.082304	0.00797825	-1.91	3.77	0.623124	0.782654
51–100	Linear	0.25	1	PR	0.257997	0.294789	0.0268335	0.00597795	0.0388166	0.0132168	-1.98	3.96	0.615043	0.764319
51–100	Linear	0.25	2	ARIMA	0.0994945	0.495557	0.016086	0.00448193	-0.0299252	0.0147211	-1.78	3.34	0.670853	0.794153
51–100	Linear	0.25	2	FLSA	0.0278826	0.0603477	0.00695817	0.000595762	-0.00394962	0.00532576	0	1.2	0.989719	0.927653
51–100	Linear	0.25	2	GAM	0.297869	0.202794	0.0230556	0.00170894	0.0464402	0.0091065	-0.98	1	0.764795	0.932423
51–100	Linear	0.25	2	LOWESS	0.369685	0.203514	0.0259378	0.00159239	0.0574808	0.00753476	-0.94	0.94	0.755261	0.937028
51–100	Linear	0.25	2	MA	1.5974	2.73646	0.0600388	0.00417025	0.065705	0.00551501	-1	1	0.593706	0.884386
51–100	Linear	0.25	2	PELT	-0.190581	0.107964	-0.00762568	0.000542068	-0.0828567	0.0077351	-1.9	3.78	0.623041	0.782743
51–100	Linear	0.25	2	PR	0.21924	0.220484	0.0196825	0.0032813	0.0292365	0.00977588	-1.98	3.96	0.626533	0.768725
51–100	Linear	0.5	0.33	ARIMA	-0.0405179	1.03951	0.0200914	0.0287125	-0.0914093	0.0452618	-1.82	3.46	0.638545	0.749643
51–100	Linear	0.5	0.33	FLSA	-0.0112973	0.178463	0.016666	0.00867317	-0.0288524	0.0203485	-0.11	1.21	0.951569	0.910064
51–100	Linear	0.5	0.33	GAM	0.583243	0.851733	0.100983	0.0354947	0.0959191	0.0429603	-0.91	0.99	0.678259	0.881942
51–100	Linear	0.5	0.33	LOWESS	0.621804	0.687439	0.0868838	0.0205219	0.0924477	0.0271925	-0.92	1.04	0.681367	0.899959
51–100	Linear	0.5	0.33	MA	2.31066	5.76889	0.137162	0.0230427	0.077576	0.00959214	-1	1	0.483845	0.815614
51–100	Linear	0.5	0.33	PELT	-0.434884	0.278786	-0.0382239	0.0041216	-0.163129	0.0322295	-1.9	3.76	0.549228	0.7631
51–100	Linear	0.5	0.33	PR	0.408835	0.839096	0.0635642	0.0383568	0.047595	0.0321972	-1.96	3.92	0.582322	0.734616
51–100	Linear	0.5	0.66	ARIMA	-0.0159582	1.02667	0.0136902	0.0213152	-0.0923526	0.0393843	-1.79	3.37	0.648336	0.760936
51–100	Linear	0.5	0.66	FLSA	-0.109413	0.111566	-0.00556498	0.00242807	-0.0464893	0.0129163	0.04	1.04	0.944053	0.928693
51–100	Linear	0.5	0.66	GAM	0.474461	0.473114	0.0571018	0.0114817	0.0667838	0.0203885	-0.92	0.96	0.725912	0.916888
51–100	Linear	0.5	0.66	LOWESS	0.484161	0.396395	0.052525	0.00835241	0.0620683	0.0144419	-0.92	0.98	0.729787	0.923179
51–100	Linear	0.5	0.66	MA	1.78461	3.49203	0.0776695	0.00850573	0.0389585	0.00486193	-1	1	0.58134	0.868644
51–100	Linear	0.5	0.66	PELT	-0.421958	0.361522	-0.0406389	0.00331142	-0.170435	0.0306212	-1.92	3.82	0.543164	0.759865
51–100	Linear	0.5	0.66	PR	0.299336	0.398187	0.0316453	0.0108994	0.0251724	0.0177811	-1.98	3.96	0.615086	0.757978
51–100	Linear	0.5	1	ARIMA	-0.0554486	0.906907	0.00581047	0.0152843	-0.0991935	0.0368188	-1.8	3.4	0.643924	0.765049
51–100	Linear	0.5	1	FLSA	-0.147933	0.119734	-0.0100888	0.00230212	-0.0548936	0.0138878	-0.15	1.25	0.913586	0.916284
51–100	Linear	0.5	1	GAM	0.412288	0.348124	0.0405658	0.0065208	0.0508503	0.0137771	-0.96	0.98	0.743918	0.925267
51–100	Linear	0.5	1	LOWESS	0.416993	0.293457	0.0387659	0.00514809	0.0480238	0.0102244	-0.93	0.99	0.750471	0.929148
51–100	Linear	0.5	1	MA	1.56235	2.68189	0.057374	0.00498405	0.0248854	0.00375547	-1	1	0.621123	0.886651
51–100	Linear	0.5	1	PELT	-0.433645	0.303445	-0.0426172	0.00273197	-0.172557	0.0307532	-1.93	3.81	0.538901	0.761456
51–100	Linear	0.5	1	PR	0.276314	0.328409	0.0247024	0.00789535	0.0197221	0.0146672	-1.98	3.96	0.623206	0.762176
51–100	Linear	0.5	2	ARIMA	0.168982	1.03788	0.021152	0.0127624	-0.0619052	0.0331116	-1.67	3.01	0.663611	0.786779
51–100	Linear	0.5	2	FLSA	-0.170259	0.102041	-0.0153814	0.00168559	-0.0548965	0.0117343	-0.01	1.23	0.92986	0.91966
51–100	Linear	0.5	2	GAM	0.343952	0.216575	0.0250242	0.00308626	0.0353717	0.00775124	-0.91	0.95	0.775869	0.935557
51–100	Linear	0.5	2	LOWESS	0.347589	0.204264	0.0263915	0.00303512	0.03328	0.00693723	-0.86	0.92	0.783719	0.938134
51–100	Linear	0.5	2	MA	1.28912	1.84294	0.0367356	0.00250264	0.00963431	0.00335786	-1	1	0.668119	0.904365
51–100	Linear	0.5	2	PELT	-0.425191	0.28883	-0.0414078	0.00264539	-0.17125	0.0303014	-1.9	3.76	0.544909	0.764721
51–100	Linear	0.5	2	PR	0.24832	0.245101	0.0160138	0.00435334	0.0128958	0.0108226	-1.98	3.96	0.633373	0.767269
51–100	Linear	1	0.33	ARIMA	0.325954	3.49428	0.085613	0.168786	-0.106573	0.125653	-1.62	2.88	0.602592	0.641668
51–100	Linear	1	0.33	FLSA	-0.315394	0.373336	-0.0611895	0.0225628	-0.116087	0.042849	0.11	1.05	0.831945	0.892279
51–100	Linear	1	0.33	GAM	0.666839	0.817673	0.100975	0.0505386	0.0700731	0.0311232	-0.91	0.99	0.683587	0.887451
51–100	Linear	1	0.33	LOWESS	0.615309	0.658854	0.0857399	0.0354532	0.0563991	0.0224695	-0.79	0.93	0.72153	0.905513
51–100	Linear	1	0.33	MA	1.87833	4.11263	0.0497807	0.0139289	-0.0332945	0.0102484	-1	1	0.585864	0.850371
51–100	Linear	1	0.33	PELT	-0.872494	1.01107	-0.163723	0.0416657	-0.328571	0.119918	-1.86	3.7	0.393588	0.683136
51–100	Linear	1	0.33	PR	0.520759	0.826598	0.0505161	0.0483544	0.0302961	0.0300065	-1.96	3.92	0.587047	0.733136
51–100	Linear	1	0.66	ARIMA	0.772534	3.08317	0.114791	0.0994847	-0.0197498	0.0862455	-1.38	2.26	0.623957	0.724433
51–100	Linear	1	0.66	FLSA	-0.436684	0.385175	-0.0930768	0.0191452	-0.146671	0.0438448	-0.05	1.33	0.790146	0.877473
51–100	Linear	1	0.66	GAM	0.569548	0.523497	0.0596199	0.0202182	0.0502932	0.0157512	-0.91	0.97	0.725119	0.916335
51–100	Linear	1	0.66	LOWESS	0.495978	0.425715	0.0476261	0.0173114	0.0348942	0.0137221	-0.85	0.87	0.75693	0.926289
51–100	Linear	1	0.66	MA	1.32883	2.18291	0.00297204	0.00869737	-0.0459762	0.0118526	-1	1	0.658304	0.88877
51–100	Linear	1	0.66	PELT	-0.869682	1.03484	-0.165938	0.0372868	-0.332547	0.119016	-1.88	3.7	0.389179	0.684615
51–100	Linear	1	0.66	PR	0.435105	0.463775	0.0149089	0.0201101	0.012255	0.0172413	-1.98	3.96	0.617817	0.754322
51–100	Linear	1	1	ARIMA	1.26088	2.93684	0.169228	0.0773418	0.0835084	0.0533771	-1.15	1.47	0.553253	0.796612
51–100	Linear	1	1	FLSA	-0.461079	0.35456	-0.101291	0.0181476	-0.147584	0.0404229	0	0.98	0.789654	0.899722
51–100	Linear	1	1	GAM	0.518834	0.423197	0.0437834	0.0131559	0.0419498	0.0112879	-0.9	0.96	0.744762	0.924765
51–100	Linear	1	1	LOWESS	0.452226	0.350924	0.0343363	0.0122471	0.0281096	0.010557	-0.86	0.88	0.770938	0.931456
51–100	Linear	1	1	MA	1.11054	1.55839	-0.0151152	0.00704037	-0.0512367	0.011869	-0.98	1	0.676633	0.901624
51–100	Linear	1	1	PELT	-0.868109	0.99128	-0.169235	0.0358123	-0.332189	0.118967	-1.87	3.67	0.389341	0.687248
51–100	Linear	1	1	PR	0.416117	0.387714	0.00581876	0.0148911	0.0077693	0.0137573	-1.98	3.96	0.626287	0.759569
51–100	Linear	1	2	ARIMA	1.41005	2.68458	0.172536	0.0532781	0.126166	0.0326854	-1.04	1.12	0.53002	0.842368
51–100	Linear	1	2	FLSA	-0.477264	0.344299	-0.108352	0.0169958	-0.151538	0.0381741	-0.08	1.08	0.770686	0.896785
51–100	Linear	1	2	GAM	0.466996	0.326236	0.0265807	0.00786914	0.0302098	0.00729619	-0.87	1.01	0.770507	0.928911
51–100	Linear	1	2	LOWESS	0.414804	0.291182	0.0216215	0.00818001	0.0221967	0.00744647	-0.83	0.97	0.789748	0.931575
51–100	Linear	1	2	MA	0.897028	1.02342	-0.0267054	0.00607069	-0.0473229	0.0112657	-0.87	0.95	0.712469	0.915698
51–100	Linear	1	2	PELT	-0.788146	0.935498	-0.155825	0.0332456	-0.317604	0.113113	-1.76	3.44	0.419077	0.704161
51–100	Linear	1	2	PR	0.40797	0.300985	-0.00189463	0.00927349	0.00626829	0.00913024	-1.97	3.91	0.631324	0.768642
51–100	Linear	2	0.33	ARIMA	2.62281	8.43302	0.596874	0.63578	0.235925	0.0966088	-0.97	0.99	0.247221	0.544287
51–100	Linear	2	0.33	FLSA	-1.07724	1.72049	-0.474683	0.323939	-0.362936	0.200339	-0.16	1.22	0.429957	0.652787
51–100	Linear	2	0.33	GAM	0.86875	1.10565	0.101244	0.119699	0.0569964	0.0267078	-0.79	1.25	0.68624	0.849952
51–100	Linear	2	0.33	LOWESS	0.753547	0.884123	0.0515937	0.0958859	0.0343495	0.0223009	-0.83	0.99	0.729734	0.878919
51–100	Linear	2	0.33	MA	1.24285	2.09581	-0.183071	0.0911961	-0.109156	0.0369056	-0.89	0.91	0.56938	0.849658
51–100	Linear	2	0.33	PELT	-1.25294	3.06237	-0.383784	0.524235	-0.478781	0.366127	-1.62	3	0.259735	0.409109
51–100	Linear	2	0.33	PR	0.872247	1.26759	0.00194361	0.123398	0.0208657	0.0284526	-1.91	3.81	0.591831	0.709489
51–100	Linear	2	0.66	ARIMA	2.1579	5.4417	0.450715	0.32419	0.214084	0.0641109	-0.93	0.95	0.335888	0.698036
51–100	Linear	2	0.66	FLSA	-1.18353	1.87681	-0.508139	0.340359	-0.385632	0.216007	-0.29	1.35	0.385602	0.629117
51–100	Linear	2	0.66	GAM	0.773849	0.813147	0.0543589	0.057132	0.0434141	0.0150536	-0.78	1.1	0.728165	0.892427
51–100	Linear	2	0.66	LOWESS	0.688965	0.687089	0.0111693	0.0532924	0.0247909	0.0134797	-0.83	1.01	0.762429	0.902214
51–100	Linear	2	0.66	MA	0.895258	1.11782	-0.202656	0.0732755	-0.0904969	0.0249087	-0.84	0.88	0.611602	0.8853
51–100	Linear	2	0.66	PELT	-0.320901	1.00359	-0.0181773	0.191998	-0.146047	0.123178	-1.04	1.42	0.699391	0.748484
51–100	Linear	2	0.66	PR	0.834956	0.916843	-0.0335692	0.0554227	0.0102219	0.0138879	-1.87	3.63	0.590569	0.755736
51–100	Linear	2	1	ARIMA	1.9756	4.49845	0.401259	0.242383	0.207293	0.0562924	-0.86	1.02	0.376362	0.740064
51–100	Linear	2	1	FLSA	-1.18662	1.78419	-0.523671	0.333633	-0.384672	0.200445	-0.14	1.12	0.395204	0.653478
51–100	Linear	2	1	GAM	0.729281	0.700593	0.0372754	0.039734	0.0377513	0.0112676	-0.79	1.11	0.743299	0.902649
51–100	Linear	2	1	LOWESS	0.661397	0.618174	-0.00458772	0.0407731	0.0194457	0.0105327	-0.87	0.99	0.766021	0.911024
51–100	Linear	2	1	MA	0.771372	0.802114	-0.205231	0.0609265	-0.0783082	0.0146658	-0.85	0.89	0.627587	0.903062
51–100	Linear	2	1	PELT	-0.185236	0.438885	0.054269	0.100639	-0.0537042	0.0581928	-0.96	1.12	0.759839	0.850815
51–100	Linear	2	1	PR	0.849707	0.877806	-0.0322121	0.0404335	0.0119746	0.010194	-1.8	3.44	0.59936	0.773926
51–100	Linear	2	2	ARIMA	1.74569	3.46405	0.334359	0.15889	0.193348	0.0463832	-0.88	0.92	0.423325	0.795484
51–100	Linear	2	2	FLSA	-1.22963	1.83514	-0.548988	0.342983	-0.395716	0.203659	-0.14	1.18	0.378125	0.64526
51–100	Linear	2	2	GAM	0.673397	0.580101	0.017865	0.0252146	0.0302376	0.00753368	-0.74	1.16	0.771014	0.909933
51–100	Linear	2	2	LOWESS	0.623906	0.542055	-0.0214135	0.0291319	0.0127143	0.00755075	-0.96	1	0.752106	0.918127
51–100	Linear	2	2	MA	0.595571	0.480247	-0.219873	0.0591926	-0.0770951	0.0107359	-0.8	0.84	0.645771	0.915799
51–100	Linear	2	2	PELT	-0.131442	0.261336	0.0455431	0.049003	-0.0370425	0.0280681	-0.77	0.99	0.809895	0.901241
51–100	Linear	2	2	PR	0.929156	0.963218	0.0182814	0.026661	0.0259062	0.0076508	-1.45	2.53	0.64233	0.82785
51–100	Quadratic	0.25	0.33	ARIMA	0.257565	1.32908	0.0454621	0.0170684	0.0116154	0.024837	-2.81	8.05	0.484968	0.520138
51–100	Quadratic	0.25	0.33	FLSA	0.220426	0.176607	0.0482706	0.00601235	0.0849062	0.0209956	-1.19	2.63	0.706689	0.833272
51–100	Quadratic	0.25	0.33	GAM	1.17302	1.92278	0.186829	0.0572388	0.274801	0.100668	-1.85	3.69	0.384557	0.677223
51–100	Quadratic	0.25	0.33	LOWESS	1.02485	1.34867	0.145545	0.0321922	0.23633	0.072588	-1.91	3.73	0.42083	0.710904
51–100	Quadratic	0.25	0.33	MA	2.4453	6.45129	0.172463	0.0322991	0.199556	0.0433176	-2	4	0.306498	0.634483
51–100	Quadratic	0.25	0.33	PELT	-0.212202	0.103792	-0.00331314	0.000842751	-0.0598723	0.00390332	-2.96	8.8	0.469714	0.507995
51–100	Quadratic	0.25	0.33	PR	1.01235	2.75518	0.165353	0.0966635	0.204726	0.086315	-2.8	8.16	0.319552	0.44666
51–100	Quadratic	0.25	0.66	ARIMA	0.503244	1.74045	0.0680061	0.0299589	0.052667	0.0342477	-2.67	7.35	0.46375	0.543316
51–100	Quadratic	0.25	0.66	FLSA	0.0735304	0.0803877	0.0231468	0.00194826	0.041129	0.0104794	-1.36	3.2	0.731431	0.812742
51–100	Quadratic	0.25	0.66	GAM	0.883714	1.12403	0.120836	0.0233964	0.21183	0.0614737	-1.76	3.5	0.470792	0.736582
51–100	Quadratic	0.25	0.66	LOWESS	0.785512	0.805811	0.0971261	0.0147805	0.185326	0.046269	-1.88	3.64	0.485614	0.747748
51–100	Quadratic	0.25	0.66	MA	1.91609	3.90531	0.112861	0.0143011	0.153845	0.0276236	-2	4	0.385862	0.691202
51–100	Quadratic	0.25	0.66	PELT	-0.160368	0.218421	0.00107862	0.00162682	-0.0557206	0.00454023	-2.93	8.69	0.480511	0.512288
51–100	Quadratic	0.25	0.66	PR	0.946812	2.40078	0.132431	0.0545564	0.177241	0.0648952	-2.74	7.92	0.353058	0.484305
51–100	Quadratic	0.25	1	ARIMA	0.681985	2.06037	0.0906709	0.0413377	0.0859975	0.045069	-2.57	6.85	0.443007	0.556021
51–100	Quadratic	0.25	1	FLSA	0.119755	0.103183	0.0287474	0.00327938	0.0524618	0.0129862	-1.09	2.41	0.760508	0.853436
51–100	Quadratic	0.25	1	GAM	0.740799	0.818516	0.0951339	0.0152101	0.180343	0.047058	-1.73	3.43	0.511839	0.757853
51–100	Quadratic	0.25	1	LOWESS	0.662598	0.59234	0.0768712	0.00999033	0.159038	0.0358238	-1.83	3.57	0.523158	0.763697
51–100	Quadratic	0.25	1	MA	1.74312	3.27788	0.0929005	0.0102864	0.133907	0.022252	-2	4	0.415569	0.706184
51–100	Quadratic	0.25	1	PELT	-0.144868	0.237227	0.00256908	0.00256184	-0.0511642	0.00588843	-2.88	8.48	0.490266	0.522726
51–100	Quadratic	0.25	1	PR	0.810383	1.79232	0.101377	0.0314303	0.15001	0.0473058	-2.79	8.07	0.377461	0.498804
51–100	Quadratic	0.25	2	ARIMA	0.837133	1.99789	0.0932495	0.027195	0.11068	0.0432278	-2.45	6.25	0.438452	0.592744
51–100	Quadratic	0.25	2	FLSA	0.0408961	0.0572404	0.0174689	0.00121027	0.0354299	0.00830487	-1.25	2.85	0.758572	0.83421
51–100	Quadratic	0.25	2	GAM	0.577559	0.554585	0.0716186	0.00959581	0.144295	0.0347267	-1.74	3.38	0.551933	0.775327
51–100	Quadratic	0.25	2	LOWESS	0.525333	0.393512	0.0578744	0.00638401	0.130381	0.0264559	-1.86	3.58	0.552645	0.774114
51–100	Quadratic	0.25	2	MA	1.52889	2.5062	0.0750102	0.00700894	0.116368	0.0182921	-2	4	0.447666	0.722389
51–100	Quadratic	0.25	2	PELT	-0.179521	0.135553	-0.00250507	0.000528118	-0.0583026	0.00380955	-2.9	8.58	0.482235	0.519946
51–100	Quadratic	0.25	2	PR	0.783014	1.64236	0.0907909	0.0233634	0.138349	0.0412943	-2.71	7.77	0.398441	0.521285
51–100	Quadratic	0.5	0.33	ARIMA	0.0631839	1.37598	0.0372614	0.021665	-0.0355673	0.0332264	-2.78	7.92	0.498934	0.521009
51–100	Quadratic	0.5	0.33	FLSA	-0.0339888	0.158607	0.0320939	0.00550173	0.024597	0.0164909	-1.31	3.07	0.747391	0.813066
51–100	Quadratic	0.5	0.33	GAM	0.932421	1.39178	0.172396	0.050789	0.217438	0.0734513	-1.8	3.54	0.438512	0.713647
51–100	Quadratic	0.5	0.33	LOWESS	0.819945	0.940934	0.135692	0.0304643	0.186222	0.0513973	-1.85	3.65	0.46978	0.736639
51–100	Quadratic	0.5	0.33	MA	2.21302	5.34323	0.157182	0.0275263	0.144488	0.0252409	-2	4	0.350973	0.665695
51–100	Quadratic	0.5	0.33	PELT	-0.41799	0.385805	-0.0207995	0.00222621	-0.119866	0.015075	-2.92	8.64	0.432355	0.508286
51–100	Quadratic	0.5	0.33	PR	0.805125	2.45039	0.152972	0.0920334	0.151919	0.0688197	-2.82	8.24	0.350603	0.455154
51–100	Quadratic	0.5	0.66	ARIMA	0.509703	2.21381	0.0955991	0.0609722	0.0414273	0.0518696	-2.58	6.92	0.467	0.54111
51–100	Quadratic	0.5	0.66	FLSA	-0.0547937	0.09925	0.0219872	0.0036869	0.020476	0.0124294	-1	2.12	0.803512	0.869696
51–100	Quadratic	0.5	0.66	GAM	0.655988	0.767747	0.109239	0.021949	0.156785	0.0436787	-1.71	3.37	0.526348	0.762124
51–100	Quadratic	0.5	0.66	LOWESS	0.579025	0.520054	0.0875497	0.0146934	0.136547	0.0316088	-1.78	3.56	0.542515	0.766871
51–100	Quadratic	0.5	0.66	MA	1.74056	3.3625	0.100821	0.0125673	0.100618	0.0152102	-2	4	0.426828	0.708842
51–100	Quadratic	0.5	0.66	PELT	-0.423855	0.353435	-0.0221445	0.0016256	-0.12142	0.0152329	-2.95	8.77	0.426483	0.501688
51–100	Quadratic	0.5	0.66	PR	0.613494	1.57207	0.0994632	0.0368918	0.111078	0.0424186	-2.83	8.25	0.398139	0.492627
51–100	Quadratic	0.5	1	ARIMA	0.637187	2.14465	0.0998237	0.0486626	0.06367	0.049115	-2.49	6.45	0.461325	0.570908
51–100	Quadratic	0.5	1	FLSA	-0.0914471	0.10569	0.017338	0.00360843	0.0107325	0.0114452	-1.14	2.46	0.784691	0.851693
51–100	Quadratic	0.5	1	GAM	0.540391	0.576225	0.0879984	0.0157629	0.131638	0.0348032	-1.7	3.34	0.559052	0.775095
51–100	Quadratic	0.5	1	LOWESS	0.456298	0.368077	0.0677535	0.010402	0.111631	0.0246286	-1.83	3.57	0.56677	0.775063
51–100	Quadratic	0.5	1	MA	1.50577	2.51334	0.0790904	0.00837413	0.0819489	0.0121093	-2	4	0.462747	0.726003
51–100	Quadratic	0.5	1	PELT	-0.352548	0.446706	-0.0155625	0.00348569	-0.113151	0.015825	-2.86	8.4	0.450347	0.519906
51–100	Quadratic	0.5	1	PR	0.599329	1.47641	0.0920862	0.0305466	0.103689	0.0387133	-2.78	8.04	0.411998	0.508252
51–100	Quadratic	0.5	2	ARIMA	0.916282	2.65362	0.129511	0.0526717	0.106252	0.057385	-2.39	5.95	0.426231	0.583415
51–100	Quadratic	0.5	2	FLSA	-0.131847	0.109531	0.0126371	0.00282486	0.00232845	0.0106482	-1.06	2.54	0.800676	0.84808
51–100	Quadratic	0.5	2	GAM	0.386396	0.402669	0.0655902	0.0108997	0.101008	0.0272069	-1.69	3.23	0.599265	0.790827
51–100	Quadratic	0.5	2	LOWESS	0.331974	0.246848	0.0505607	0.00716296	0.0882936	0.0191739	-1.81	3.55	0.599769	0.782991
51–100	Quadratic	0.5	2	MA	1.25112	1.71338	0.0580331	0.00531346	0.0628172	0.0100555	-2	4	0.501316	0.741359
51–100	Quadratic	0.5	2	PELT	-0.433302	0.288532	-0.0220686	0.00148256	-0.117575	0.0160122	-2.91	8.65	0.432953	0.50862
51–100	Quadratic	0.5	2	PR	0.466627	1.01087	0.0685814	0.0180574	0.0816051	0.0301511	-2.79	8.05	0.438025	0.520968
51–100	Quadratic	1	0.33	ARIMA	0.12208	3.03305	0.0875706	0.150655	-0.0491367	0.0924623	-2.64	7.22	0.485638	0.47045
51–100	Quadratic	1	0.33	FLSA	-0.419848	0.38955	-0.0190995	0.01173	-0.0697369	0.0267243	-1.16	2.5	0.713274	0.830415
51–100	Quadratic	1	0.33	GAM	0.586629	0.850395	0.14119	0.0499524	0.132502	0.0477496	-1.76	3.48	0.521664	0.743486
51–100	Quadratic	1	0.33	LOWESS	0.486123	0.53658	0.104927	0.0322705	0.104787	0.0303633	-1.82	3.58	0.550857	0.760829
51–100	Quadratic	1	0.33	MA	1.69013	3.23553	0.0814908	0.0107872	0.0328743	0.00703398	-1.99	3.97	0.46882	0.718465
51–100	Quadratic	1	0.33	PELT	-0.910735	1.01691	-0.103418	0.0122744	-0.243491	0.0602093	-2.92	8.64	0.323985	0.478059
51–100	Quadratic	1	0.33	PR	0.335837	1.49671	0.0816079	0.0574423	0.0542937	0.0465646	-2.87	8.43	0.437143	0.476017
51–100	Quadratic	1	0.66	ARIMA	0.462642	2.95993	0.122464	0.107732	0.0149683	0.0846749	-2.48	6.44	0.48127	0.524647
51–100	Quadratic	1	0.66	FLSA	-0.471542	0.371315	-0.0330036	0.00760875	-0.0746616	0.0216605	-1.18	2.7	0.695291	0.825002
51–100	Quadratic	1	0.66	GAM	0.386289	0.461577	0.0884718	0.0248586	0.0977146	0.0297964	-1.55	3.15	0.610168	0.787851
51–100	Quadratic	1	0.66	LOWESS	0.237597	0.295551	0.0511297	0.016663	0.0577337	0.0200239	-1.79	3.55	0.625119	0.778537
51–100	Quadratic	1	0.66	MA	1.23071	1.85465	0.0268745	0.00477434	-0.00777203	0.00701709	-2	4	0.541545	0.741267
51–100	Quadratic	1	0.66	PELT	-0.896579	1.02365	-0.093923	0.0164038	-0.233825	0.0620538	-2.93	8.67	0.330485	0.474367
51–100	Quadratic	1	0.66	PR	0.223211	1.12261	0.0529739	0.0374473	0.0321145	0.0391689	-2.82	8.24	0.474574	0.499466
51–100	Quadratic	1	1	ARIMA	0.593753	2.72666	0.125482	0.083457	0.0387703	0.0752433	-2.35	6.01	0.481584	0.560535
51–100	Quadratic	1	1	FLSA	-0.546244	0.454922	-0.0429651	0.00959268	-0.0940152	0.0272413	-1.24	2.82	0.663601	0.812345
51–100	Quadratic	1	1	GAM	0.296675	0.364227	0.0700514	0.0195695	0.0811374	0.0257364	-1.46	3.26	0.649182	0.788148
51–100	Quadratic	1	1	LOWESS	0.167138	0.252324	0.0383111	0.0132517	0.0473936	0.0182307	-1.69	3.41	0.658724	0.789209
51–100	Quadratic	1	1	MA	1.00336	1.26027	0.00591968	0.00375949	-0.0238042	0.00799309	-1.98	3.96	0.566784	0.752769
51–100	Quadratic	1	1	PELT	-0.783843	0.941963	-0.0690255	0.020269	-0.203115	0.0602703	-2.8	8.1	0.373948	0.504249
51–100	Quadratic	1	1	PR	0.260751	0.996447	0.0539379	0.0300437	0.0378369	0.035699	-2.74	7.8	0.482117	0.527944
51–100	Quadratic	1	2	ARIMA	0.715619	2.4516	0.125328	0.0639126	0.0593158	0.0652748	-2.32	5.64	0.469612	0.593797
51–100	Quadratic	1	2	FLSA	-0.524019	0.41514	-0.039851	0.00902361	-0.0832475	0.0241835	-1.08	2.22	0.696382	0.847797
51–100	Quadratic	1	2	GAM	0.191399	0.29396	0.0487422	0.0148425	0.0613577	0.0221744	-1.52	3.02	0.670759	0.80636
51–100	Quadratic	1	2	LOWESS	0.0696857	0.206996	0.021071	0.00997132	0.0317171	0.0161326	-1.8	3.48	0.66683	0.788681
51–100	Quadratic	1	2	MA	0.74446	0.717211	-0.0128044	0.00382861	-0.0391953	0.00988845	-2	4	0.576397	0.758179
51–100	Quadratic	1	2	PELT	-0.622174	0.85216	-0.0195162	0.028477	-0.148289	0.0567917	-2.66	7.46	0.444779	0.537566
51–100	Quadratic	1	2	PR	0.266864	0.965971	0.0484758	0.0273805	0.0355125	0.0327882	-2.64	7.5	0.501046	0.546391
51–100	Quadratic	2	0.33	ARIMA	0.644112	5.59775	0.249031	0.507127	0.0197348	0.194807	-2.29	5.71	0.432147	0.368509
51–100	Quadratic	2	0.33	FLSA	-1.32105	2.08901	-0.296824	0.116188	-0.272939	0.108021	-1.37	3.21	0.385699	0.675878
51–100	Quadratic	2	0.33	GAM	0.288157	0.694677	0.0989627	0.105948	0.0683117	0.0440806	-1.68	3.3	0.608106	0.740635
51–100	Quadratic	2	0.33	LOWESS	0.0666766	0.582853	-0.00118704	0.0736294	0.000725026	0.03234	-1.79	3.43	0.694439	0.753671
51–100	Quadratic	2	0.33	MA	0.785572	1.21517	-0.213144	0.057737	-0.175878	0.0413107	-1.96	3.88	0.429445	0.718578
51–100	Quadratic	2	0.33	PELT	-1.44085	3.40578	-0.233269	0.232213	-0.358257	0.204635	-2.7	7.72	0.235782	0.371806
51–100	Quadratic	2	0.33	PR	0.403372	2.76783	0.0967046	0.255	0.0288389	0.0857187	-2.48	6.78	0.493671	0.468196
51–100	Quadratic	2	0.66	ARIMA	0.876093	3.59514	0.211233	0.259762	0.0719249	0.119379	-1.96	4.6	0.463457	0.541268
51–100	Quadratic	2	0.66	FLSA	-1.29586	2.02321	-0.278955	0.11411	-0.261462	0.10609	-1.33	2.91	0.403284	0.693289
51–100	Quadratic	2	0.66	GAM	0.141398	0.470369	0.0482133	0.0697135	0.0483035	0.0330294	-1.58	3.16	0.672827	0.770717
51–100	Quadratic	2	0.66	LOWESS	-0.0335739	0.446003	-0.0436786	0.0539977	-0.0148637	0.0263331	-1.79	3.59	0.667392	0.757648
51–100	Quadratic	2	0.66	MA	0.294061	0.460872	-0.265548	0.0829643	-0.204257	0.0541564	-1.96	3.88	0.430938	0.714374
51–100	Quadratic	2	0.66	PELT	-1.20707	2.47835	-0.133874	0.171398	-0.258349	0.1585	-2.53	6.77	0.333118	0.460187
51–100	Quadratic	2	0.66	PR	0.613001	1.97247	0.10072	0.139275	0.0598541	0.0512134	-2.13	5.35	0.516615	0.600701
51–100	Quadratic	2	1	ARIMA	1.04013	3.20163	0.22363	0.2171	0.105915	0.0955618	-1.91	4.29	0.439424	0.586853
51–100	Quadratic	2	1	FLSA	-1.35801	2.12559	-0.310295	0.123572	-0.285016	0.10991	-1.26	2.78	0.38441	0.692459
51–100	Quadratic	2	1	GAM	0.0883676	0.389249	0.0343703	0.0589753	0.044381	0.0285524	-1.53	2.95	0.695111	0.789882
51–100	Quadratic	2	1	LOWESS	-0.086929	0.354861	-0.0617622	0.0465933	-0.021786	0.0232434	-1.75	3.49	0.656045	0.769006
51–100	Quadratic	2	1	MA	0.121207	0.314968	-0.283802	0.092431	-0.21751	0.0599072	-1.95	3.87	0.431135	0.71052
51–100	Quadratic	2	1	PELT	-1.1552	2.2314	-0.139119	0.152187	-0.254544	0.149762	-2.45	6.41	0.344903	0.489089
51–100	Quadratic	2	1	PR	0.456748	1.2812	0.0565609	0.0944333	0.0386291	0.0353774	-2.12	5.16	0.561425	0.643071
51–100	Quadratic	2	2	ARIMA	1.30362	2.91675	0.265562	0.165781	0.162603	0.0748615	-1.86	3.84	0.387379	0.639931
51–100	Quadratic	2	2	FLSA	-1.37964	2.12743	-0.31979	0.121058	-0.287238	0.106696	-1.32	2.86	0.372239	0.691545
51–100	Quadratic	2	2	GAM	0.023272	0.32161	0.0143744	0.0505378	0.0377793	0.0254018	-1.47	2.97	0.725212	0.794881
51–100	Quadratic	2	2	LOWESS	-0.132361	0.26979	-0.070591	0.0411372	-0.0228535	0.0203334	-1.68	3.66	0.658005	0.764936
51–100	Quadratic	2	2	MA	-0.0715065	0.300068	-0.275853	0.105593	-0.212161	0.0666509	-1.95	3.87	0.440195	0.702305
51–100	Quadratic	2	2	PELT	-1.03781	1.86195	-0.0993246	0.119593	-0.197951	0.118651	-2.3	5.84	0.407212	0.546053
51–100	Quadratic	2	2	PR	0.500842	1.04954	0.074678	0.0815838	0.0456676	0.0297011	-1.75	3.83	0.601353	0.724122
51–100	Recurrent	0.25	0.33	ARIMA	0.310834	1.441	0.0439381	0.0189124	-0.0207517	0.0271773	-2.79	7.95	0.482135	0.522428
51–100	Recurrent	0.25	0.33	FLSA	0.29086	0.2712	0.0536831	0.00870763	0.0638461	0.0200358	-1.02	2.16	0.733921	0.856932
51–100	Recurrent	0.25	0.33	GAM	1.05233	1.53429	0.150388	0.0419857	0.208233	0.063867	-1.93	3.85	0.425967	0.704743
51–100	Recurrent	0.25	0.33	LOWESS	0.986918	1.22677	0.136374	0.0302758	0.200899	0.0533482	-1.91	3.73	0.442276	0.726518
51–100	Recurrent	0.25	0.33	MA	2.40319	6.16964	0.15999	0.0285136	0.159325	0.0299642	-2	4	0.329501	0.648938
51–100	Recurrent	0.25	0.33	PELT	-0.174709	0.206319	-0.00818744	0.00180525	-0.0988596	0.0103105	-2.95	8.77	0.457697	0.505395
51–100	Recurrent	0.25	0.33	PR	1.08805	2.78978	0.174711	0.10421	0.18879	0.0820007	-2.8	8.16	0.316189	0.446052
51–100	Recurrent	0.25	0.66	ARIMA	0.517634	2.02425	0.0747738	0.044882	0.0162827	0.0390135	-2.7	7.5	0.467685	0.525224
51–100	Recurrent	0.25	0.66	FLSA	0.133142	0.15114	0.0247167	0.00375865	0.0108306	0.0119439	-1.23	2.83	0.761574	0.830172
51–100	Recurrent	0.25	0.66	GAM	0.8065	0.981676	0.102259	0.0210764	0.155072	0.0415011	-1.89	3.69	0.493506	0.743522
51–100	Recurrent	0.25	0.66	LOWESS	0.756859	0.779189	0.0915448	0.0155334	0.148934	0.034436	-1.88	3.66	0.506389	0.755018
51–100	Recurrent	0.25	0.66	MA	1.87703	3.74655	0.0998815	0.0120034	0.111869	0.0178193	-2.01	4.05	0.410234	0.698507
51–100	Recurrent	0.25	0.66	PELT	-0.165954	0.204893	-0.00899602	0.00147079	-0.098268	0.0102991	-2.92	8.66	0.46263	0.511554
51–100	Recurrent	0.25	0.66	PR	0.964123	2.32832	0.133108	0.0580395	0.149893	0.0580861	-2.75	7.97	0.359272	0.484793
51–100	Recurrent	0.25	1	ARIMA	0.63676	2.11392	0.0843707	0.0419137	0.0364677	0.0411409	-2.63	7.15	0.458179	0.541892
51–100	Recurrent	0.25	1	FLSA	0.120738	0.110617	0.0184761	0.00213269	0.00660446	0.0090021	-1.13	2.51	0.784866	0.851157
51–100	Recurrent	0.25	1	GAM	0.703375	0.803338	0.085003	0.015614	0.133321	0.0340243	-1.81	3.55	0.530228	0.760702
51–100	Recurrent	0.25	1	LOWESS	0.654202	0.618131	0.074194	0.0112242	0.124509	0.0273707	-1.88	3.66	0.533771	0.7639
51–100	Recurrent	0.25	1	MA	1.63697	2.84303	0.0787762	0.00803577	0.0922033	0.0142868	-2.01	4.05	0.446402	0.716702
51–100	Recurrent	0.25	1	PELT	-0.209647	0.139632	-0.0116625	0.0011074	-0.0998785	0.0105756	-2.96	8.84	0.45175	0.502379
51–100	Recurrent	0.25	1	PR	0.891213	2.04448	0.112427	0.0409008	0.130173	0.0480051	-2.74	7.92	0.380599	0.500392
51–100	Recurrent	0.25	2	ARIMA	0.743001	2.29135	0.0940368	0.0376485	0.0520419	0.0434763	-2.6	7	0.445046	0.547407
51–100	Recurrent	0.25	2	FLSA	0.0645757	0.0808558	0.00977104	0.00109803	-0.00588257	0.00662007	-1.14	2.56	0.794387	0.851048
51–100	Recurrent	0.25	2	GAM	0.572677	0.607073	0.0665825	0.0105838	0.106248	0.0264936	-1.81	3.49	0.562427	0.773996
51–100	Recurrent	0.25	2	LOWESS	0.535451	0.469316	0.0575453	0.0078811	0.0968743	0.0212498	-1.91	3.73	0.559948	0.767867
51–100	Recurrent	0.25	2	MA	1.39403	2.05405	0.0620347	0.00557548	0.0754019	0.0118881	-2.01	4.05	0.480779	0.731866
51–100	Recurrent	0.25	2	PELT	-0.207828	0.111644	-0.01245	0.000564712	-0.100914	0.0103487	-2.97	8.85	0.449614	0.502404
51–100	Recurrent	0.25	2	PR	0.735667	1.40148	0.0809561	0.020621	0.0996962	0.0333745	-2.78	7.98	0.409694	0.517826
51–100	Recurrent	0.5	0.33	ARIMA	0.241465	2.27885	0.0513285	0.0873382	-0.0875201	0.0611337	-2.71	7.85	0.471685	0.481275
51–100	Recurrent	0.5	0.33	FLSA	0.0661219	0.19179	0.00734414	0.00498068	-0.0373733	0.0157198	-0.9	1.86	0.816654	0.879247
51–100	Recurrent	0.5	0.33	GAM	0.843841	1.16781	0.123256	0.0406996	0.123798	0.0394939	-1.8	3.64	0.506607	0.73836
51–100	Recurrent	0.5	0.33	LOWESS	0.802918	0.968304	0.109867	0.0292844	0.115187	0.0301432	-1.92	3.76	0.503584	0.745213
51–100	Recurrent	0.5	0.33	MA	2.2018	5.25673	0.125693	0.019492	0.0689953	0.0108563	-2	4	0.393573	0.678986
51–100	Recurrent	0.5	0.33	PELT	-0.425619	0.356876	-0.053971	0.00486083	-0.201746	0.0412734	-2.95	8.77	0.384627	0.489087
51–100	Recurrent	0.5	0.33	PR	0.981724	2.97798	0.176532	0.147056	0.116541	0.0744306	-2.75	7.99	0.349881	0.443347
51–100	Recurrent	0.5	0.66	ARIMA	0.595451	2.47414	0.0832263	0.0639296	-0.0234432	0.055189	-2.58	6.9	0.473749	0.536269
51–100	Recurrent	0.5	0.66	FLSA	-0.0457656	0.127197	-0.0152852	0.00316974	-0.0734174	0.0161323	-0.93	2.03	0.789016	0.871439
51–100	Recurrent	0.5	0.66	GAM	0.627077	0.798366	0.0790381	0.0242964	0.0744733	0.0276149	-1.78	3.56	0.570476	0.761943
51–100	Recurrent	0.5	0.66	LOWESS	0.581827	0.616452	0.0636118	0.0160144	0.0619462	0.0202037	-1.94	3.82	0.564234	0.758704
51–100	Recurrent	0.5	0.66	MA	1.66478	3.02354	0.0695079	0.00813468	0.0296532	0.00869104	-1.99	3.97	0.47736	0.721615
51–100	Recurrent	0.5	0.66	PELT	-0.413993	0.349195	-0.054715	0.00452392	-0.200557	0.0410367	-2.92	8.66	0.389458	0.495229
51–100	Recurrent	0.5	0.66	PR	0.742483	1.96487	0.110719	0.0677394	0.0639301	0.0504697	-2.74	7.94	0.412906	0.491058
51–100	Recurrent	0.5	1	ARIMA	0.735259	2.90756	0.0974397	0.0633034	-0.00825251	0.056871	-2.56	6.8	0.465401	0.535107
51–100	Recurrent	0.5	1	FLSA	-0.0813248	0.109249	-0.0229834	0.00255799	-0.0840121	0.0157099	-0.89	1.83	0.781162	0.883229
51–100	Recurrent	0.5	1	GAM	0.52802	0.680978	0.0606546	0.0192271	0.0497363	0.0242518	-1.83	3.63	0.592117	0.764067
51–100	Recurrent	0.5	1	LOWESS	0.479536	0.500546	0.0472794	0.0127548	0.0391582	0.0184581	-1.91	3.81	0.595852	0.763374
51–100	Recurrent	0.5	1	MA	1.44828	2.27956	0.048557	0.00541962	0.0113425	0.0084295	-1.99	3.97	0.512768	0.734768
51–100	Recurrent	0.5	1	PELT	-0.363223	0.481581	-0.0435409	0.00782622	-0.18735	0.0412951	-2.89	8.55	0.406345	0.498471
51–100	Recurrent	0.5	1	PR	0.683665	1.77471	0.0931875	0.0521762	0.0511051	0.0447823	-2.72	7.88	0.432375	0.503645
51–100	Recurrent	0.5	2	ARIMA	0.764231	2.68535	0.0907089	0.0475204	-0.00487454	0.0511095	-2.53	6.65	0.472438	0.553069
51–100	Recurrent	0.5	2	FLSA	-0.154334	0.110441	-0.0326721	0.00260055	-0.104622	0.017996	-1.01	2.19	0.738047	0.861775
51–100	Recurrent	0.5	2	GAM	0.404169	0.570218	0.0412995	0.0144456	0.0192236	0.0224734	-1.86	3.72	0.622317	0.763806
51–100	Recurrent	0.5	2	LOWESS	0.37675	0.426301	0.0319971	0.0102158	0.0128394	0.018479	-1.92	3.76	0.623149	0.768104
51–100	Recurrent	0.5	2	MA	1.20803	1.57952	0.0327577	0.00399265	-0.00199745	0.00920623	-1.99	3.97	0.544762	0.746125
51–100	Recurrent	0.5	2	PELT	-0.43242	0.287294	-0.0522666	0.00491606	-0.19735	0.0411056	-2.95	8.75	0.38641	0.490956
51–100	Recurrent	0.5	2	PR	0.56961	1.40459	0.0658445	0.032628	0.0231483	0.0355442	-2.71	7.87	0.46476	0.518795
51–100	Recurrent	1	0.33	ARIMA	0.654765	4.67976	0.0685328	0.232372	-0.129329	0.132819	-2.54	6.7	0.443568	0.433875
51–100	Recurrent	1	0.33	FLSA	-0.420494	0.353916	-0.166662	0.0341132	-0.239491	0.0728629	-1.08	2.34	0.566383	0.798247
51–100	Recurrent	1	0.33	GAM	0.662378	0.994307	0.0366132	0.0602063	-0.00403784	0.0347627	-1.82	3.6	0.614834	0.74046
51–100	Recurrent	1	0.33	LOWESS	0.577222	0.856794	0.000480048	0.0414591	-0.0341379	0.0295288	-1.96	3.88	0.605536	0.737258
51–100	Recurrent	1	0.33	MA	1.82124	3.75374	-0.0173417	0.0072809	-0.0929363	0.0192558	-2	4	0.45573	0.701347
51–100	Recurrent	1	0.33	PELT	-0.907321	1.03808	-0.229527	0.0612583	-0.402313	0.165159	-2.94	8.72	0.230008	0.413805
51–100	Recurrent	1	0.33	PR	0.681349	2.72736	0.0686128	0.173906	-0.0374618	0.0819913	-2.76	8.04	0.443376	0.432587
51–100	Recurrent	1	0.66	ARIMA	0.668696	3.76904	0.0409954	0.140551	-0.122792	0.110538	-2.49	6.45	0.464545	0.491399
51–100	Recurrent	1	0.66	FLSA	-0.495553	0.382359	-0.185015	0.0385375	-0.261931	0.0804488	-0.94	1.96	0.557743	0.810226
51–100	Recurrent	1	0.66	GAM	0.549543	0.784832	-0.00211751	0.0461068	-0.0377497	0.0328171	-1.74	3.5	0.638547	0.754935
51–100	Recurrent	1	0.66	LOWESS	0.471266	0.608732	-0.0342876	0.0301146	-0.0645604	0.0288715	-1.95	3.85	0.585584	0.7469
51–100	Recurrent	1	0.66	MA	1.24309	1.78741	-0.0805027	0.0122995	-0.133096	0.0293217	-1.99	3.97	0.463173	0.726622
51–100	Recurrent	1	0.66	PELT	-0.812487	1.02949	-0.211029	0.060034	-0.38354	0.15719	-2.86	8.38	0.254602	0.433561
51–100	Recurrent	1	0.66	PR	0.420801	1.63883	-0.0101949	0.0835646	-0.0844496	0.0684008	-2.77	8.07	0.471802	0.475146
51–100	Recurrent	1	1	ARIMA	0.585105	3.36461	0.0163053	0.11305	-0.137383	0.108091	-2.5	6.5	0.47512	0.502944
51–100	Recurrent	1	1	FLSA	-0.536021	0.400609	-0.195403	0.040914	-0.276597	0.0858251	-0.89	2.01	0.548148	0.802537
51–100	Recurrent	1	1	GAM	0.50129	0.705768	-0.0194978	0.0394874	-0.0532311	0.0325724	-1.75	3.51	0.625357	0.757963
51–100	Recurrent	1	1	LOWESS	0.444498	0.521917	-0.0456144	0.0272565	-0.0758703	0.0299278	-1.88	3.72	0.587565	0.755465
51–100	Recurrent	1	1	MA	1.00242	1.18822	-0.103531	0.0165201	-0.150766	0.0352095	-1.99	3.97	0.465756	0.731116
51–100	Recurrent	1	1	PELT	-0.725117	1.14312	-0.18772	0.0602724	-0.359653	0.149176	-2.8	8.14	0.281063	0.44713
51–100	Recurrent	1	1	PR	0.366211	1.24637	-0.0294708	0.063056	-0.090974	0.0597182	-2.75	7.97	0.466704	0.494739
51–100	Recurrent	1	2	ARIMA	0.624955	3.1531	0.0136844	0.0925656	-0.130963	0.100708	-2.47	6.35	0.479958	0.522212
51–100	Recurrent	1	2	FLSA	-0.601555	0.456951	-0.2071	0.0448827	-0.298779	0.097228	-1.07	2.35	0.504239	0.774566
51–100	Recurrent	1	2	GAM	0.485872	0.648718	-0.0318068	0.0338406	-0.0614648	0.0304152	-1.86	3.74	0.600338	0.749904
51–100	Recurrent	1	2	LOWESS	0.441799	0.452183	-0.0562684	0.0226759	-0.085973	0.0287531	-1.92	3.82	0.572085	0.753499
51–100	Recurrent	1	2	MA	0.775852	0.761335	-0.117082	0.0255214	-0.161146	0.041724	-1.99	3.97	0.473861	0.730887
51–100	Recurrent	1	2	PELT	-0.59991	0.915747	-0.15601	0.0510977	-0.324656	0.131586	-2.69	7.57	0.323608	0.487752
51–100	Recurrent	1	2	PR	0.316994	1.02274	-0.052887	0.047767	-0.104272	0.0532032	-2.74	7.92	0.455256	0.507556
51–100	Recurrent	2	0.33	ARIMA	1.35691	6.39316	-0.0776066	0.584694	-0.169947	0.210857	-2.13	4.91	0.42262	0.365677
51–100	Recurrent	2	0.33	FLSA	-1.14043	1.75008	-0.79758	0.676053	-0.575082	0.365357	-1.06	2.28	0.171345	0.421393
51–100	Recurrent	2	0.33	GAM	0.871493	1.49861	-0.249037	0.278687	-0.152677	0.0713283	-1.8	3.6	0.437205	0.642444
51–100	Recurrent	2	0.33	LOWESS	0.86492	1.61888	-0.327455	0.251513	-0.211696	0.0800845	-1.87	3.67	0.37397	0.639799
51–100	Recurrent	2	0.33	MA	0.924225	1.26391	-0.678635	0.475705	-0.421974	0.194703	-1.98	3.94	0.171316	0.502988
51–100	Recurrent	2	0.33	PELT	-1.56458	3.37458	-0.818371	0.811282	-0.724403	0.577585	-2.77	7.97	0.0242364	0.1248
51–100	Recurrent	2	0.33	PR	0.797899	2.92315	-0.242135	0.458881	-0.16761	0.125385	-2.52	7.14	0.346518	0.375731
51–100	Recurrent	2	0.66	ARIMA	1.8178	4.95664	-0.0345038	0.332269	-0.0711627	0.0863286	-1.9	3.92	0.470951	0.552754
51–100	Recurrent	2	0.66	FLSA	-1.24982	1.88807	-0.837884	0.728432	-0.599113	0.387429	-1.04	2.04	0.151503	0.404644
51–100	Recurrent	2	0.66	GAM	0.92263	1.39624	-0.223429	0.22182	-0.122969	0.0544159	-1.7	3.4	0.469396	0.681848
51–100	Recurrent	2	0.66	LOWESS	0.872147	1.2672	-0.331182	0.204314	-0.195515	0.0637353	-1.72	3.6	0.396309	0.672968
51–100	Recurrent	2	0.66	MA	0.475034	0.866342	-0.670316	0.590774	-0.41946	0.218918	-1.91	3.77	0.199841	0.472649
51–100	Recurrent	2	0.66	PELT	-1.11546	2.54754	-0.655443	0.609186	-0.596471	0.437261	-2.47	6.61	0.0984041	0.245784
51–100	Recurrent	2	0.66	PR	1.36822	3.28944	-0.0752802	0.278797	-0.0663944	0.0590411	-1.68	4.38	0.523644	0.585182
51–100	Recurrent	2	1	ARIMA	1.84248	4.68423	-0.0306156	0.259659	-0.0545028	0.0691267	-1.86	3.84	0.482743	0.59044
51–100	Recurrent	2	1	FLSA	-1.30821	2.01234	-0.852954	0.75143	-0.614901	0.406689	-1.1	2.44	0.137392	0.374125
51–100	Recurrent	2	1	GAM	0.937798	1.3777	-0.215779	0.197725	-0.108092	0.046389	-1.62	3.32	0.488367	0.698769
51–100	Recurrent	2	1	LOWESS	0.828292	1.01713	-0.331188	0.185175	-0.178814	0.054822	-1.55	3.39	0.427207	0.699188
51–100	Recurrent	2	1	MA	0.424547	1.06728	-0.622904	0.612417	-0.400699	0.225027	-1.87	3.69	0.227952	0.464894
51–100	Recurrent	2	1	PELT	-1.02446	2.31666	-0.627638	0.582045	-0.557136	0.399049	-2.34	6.1	0.12498	0.284764
51–100	Recurrent	2	1	PR	1.4141	3.08989	-0.0806326	0.19913	-0.0595402	0.0448549	-1.45	3.67	0.549967	0.654938
51–100	Recurrent	2	2	ARIMA	1.91068	4.725	-0.00625494	0.214143	-0.0306166	0.0547021	-1.76	3.64	0.509636	0.620837
51–100	Recurrent	2	2	FLSA	-1.25121	1.89677	-0.839703	0.732271	-0.597204	0.387492	-1	2.16	0.154294	0.399538
51–100	Recurrent	2	2	GAM	1.00159	1.36792	-0.189296	0.157456	-0.0836681	0.035985	-1.43	2.89	0.531015	0.740574
51–100	Recurrent	2	2	LOWESS	0.799442	0.884327	-0.323474	0.171828	-0.158947	0.0457598	-1.35	2.91	0.466486	0.736415
51–100	Recurrent	2	2	MA	0.531183	1.68486	-0.518367	0.591957	-0.352602	0.220963	-1.83	3.65	0.278921	0.466196
51–100	Recurrent	2	2	PELT	-0.818257	2.07008	-0.575683	0.513569	-0.51324	0.355113	-2.11	5.49	0.176136	0.341667
51–100	Recurrent	2	2	PR	1.43926	2.8675	-0.089168	0.140543	-0.0533483	0.0317073	-1.16	2.8	0.584266	0.728316
101–200	No change	0	0.33	ARIMA	0.211179	0.707832	0.0230621	0.00929649	0.0301096	0.0143995	0.07	0.07	0.927831	0.96592
101–200	No change	0	0.33	FLSA	0.300892	0.168163	0.0186844	0.00088971	0.0774063	0.00922666	1.85	4.55	0.61761	0.738327
101–200	No change	0	0.33	GAM	0.432766	0.237403	0.0196818	0.000731141	0.10522	0.0139461	1.07	1.21	0.705176	0.916631
101–200	No change	0	0.33	LOWESS	0.495277	0.275853	0.0244506	0.000877866	0.120856	0.0160093	1.35	2.09	0.647729	0.866237
101–200	No change	0	0.33	MA	3.46851	12.4389	0.175018	0.0321593	0.22179	0.0495702	1	1	0.283795	0.649895
101–200	No change	0	0.33	PELT	0.0448586	0.121635	0.00168218	0.000239434	0.00060628	2.36667e-05	0.03	0.03	0.987717	0.995685
101–200	No change	0	0.33	PR	0.419052	0.300652	0.02019	0.00116368	0.100526	0.0140046	0.01	0.01	0.863596	0.980643
101–200	No change	0	0.66	ARIMA	0.270283	0.654381	0.0239551	0.00576624	0.0416749	0.0152923	0.12	0.12	0.904117	0.964692
101–200	No change	0	0.66	FLSA	0.232206	0.111208	0.0121556	0.000439883	0.0654658	0.00684189	1.84	4.42	0.634344	0.748071
101–200	No change	0	0.66	GAM	0.342428	0.151494	0.0125139	0.000320365	0.0836366	0.00890324	1.07	1.21	0.73057	0.922517
101–200	No change	0	0.66	LOWESS	0.387994	0.173648	0.0152907	0.000378091	0.0939081	0.0100038	1.26	1.82	0.690512	0.887704
101–200	No change	0	0.66	MA	2.70796	7.61196	0.106905	0.0120303	0.173608	0.030392	1	1	0.40242	0.765431
101–200	No change	0	0.66	PELT	0.0048121	0.00231563	3.06678e-05	9.40517e-08	6.41613e-05	4.11667e-07	0.01	0.01	0.997633	0.999395
101–200	No change	0	0.66	PR	0.322758	0.18568	0.0124839	0.000475395	0.0774097	0.00869221	0.01	0.01	0.895862	0.987873
101–200	No change	0	1	ARIMA	0.167761	0.362123	0.0145531	0.00307917	0.0266213	0.00921977	0.08	0.08	0.938755	0.979045
101–200	No change	0	1	FLSA	0.202122	0.0718289	0.0088647	0.000184086	0.0601844	0.0055728	1.93	4.77	0.627326	0.730286
101–200	No change	0	1	GAM	0.303386	0.123584	0.0102299	0.000221685	0.0745538	0.00734932	1.07	1.21	0.741062	0.924351
101–200	No change	0	1	LOWESS	0.343245	0.139336	0.0122148	0.000258185	0.0827264	0.00804959	1.15	1.51	0.719179	0.906963
101–200	No change	0	1	MA	2.36013	5.82135	0.0832486	0.00729765	0.154154	0.0239556	1	1	0.45624	0.807364
101–200	No change	0	1	PELT	0.0233304	0.0289668	0.000325592	6.30678e-06	0.000266878	3.70992e-06	0.02	0.02	0.99321	0.998276
101–200	No change	0	1	PR	0.282771	0.147984	0.010054	0.000310922	0.0678544	0.00703824	0.01	0.01	0.90891	0.990148
101–200	No change	0	2	ARIMA	0.141501	0.235633	0.0084036	0.000992066	0.0209206	0.00512867	0.09	0.09	0.94772	0.985337
101–200	No change	0	2	FLSA	0.156735	0.0465661	0.00637875	9.83791e-05	0.0509095	0.00439484	1.65	3.97	0.681061	0.775685
101–200	No change	0	2	GAM	0.265089	0.098309	0.00818044	0.000139517	0.0655968	0.00597702	1.06	1.18	0.752843	0.927635
101–200	No change	0	2	LOWESS	0.297923	0.108518	0.00946029	0.000162301	0.0711876	0.00626651	1.07	1.23	0.743941	0.924437
101–200	No change	0	2	MA	2.01332	4.27868	0.0614647	0.00399729	0.132604	0.0177253	1	1	0.512012	0.843929
101–200	No change	0	2	PELT	0.0278957	0.0313747	0.000609813	1.37787e-05	0.00176894	0.00019104	0.05	0.09	0.986439	0.994175
101–200	No change	0	2	PR	0.228015	0.0847371	0.00720378	0.000128276	0.0573869	0.00536693	0	0	0.926337	0.993533
101–200	Jump	0.25	0.33	ARIMA	0.216803	0.95879	0.0199631	0.00529633	-0.000443443	0.0139707	-0.78	0.78	0.833865	0.924154
101–200	Jump	0.25	0.33	FLSA	-0.01019	0.0918593	0.00871056	0.00126082	0.00234207	0.00743938	0.32	1.46	0.939022	0.910788
101–200	Jump	0.25	0.33	GAM	0.443587	0.384194	0.0412246	0.00413443	0.0979535	0.0202668	0.03	0.03	0.848995	0.971442
101–200	Jump	0.25	0.33	LOWESS	0.462954	0.344938	0.0424839	0.0042782	0.104045	0.019369	0.16	0.24	0.823021	0.961606
101–200	Jump	0.25	0.33	MA	3.05523	9.67992	0.159166	0.0263624	0.174868	0.0325336	0	0	0.431081	0.761932
101–200	Jump	0.25	0.33	PELT	-0.225585	0.0780539	-0.0111231	0.000141511	-0.0605719	0.00367799	-0.97	0.97	0.772388	0.941502
101–200	Jump	0.25	0.33	PR	0.257689	0.233638	0.024594	0.00297557	0.0668427	0.0150957	-1	1	0.753743	0.92651
101–200	Jump	0.25	0.66	ARIMA	0.137974	0.589489	0.00939527	0.00201147	-0.0098031	0.00917666	-0.76	0.76	0.846302	0.937667
101–200	Jump	0.25	0.66	FLSA	-0.08858	0.0508468	-0.0021828	0.000348152	-0.0211007	0.00369453	0.19	1.27	0.94164	0.925366
101–200	Jump	0.25	0.66	GAM	0.302829	0.207958	0.0221353	0.0015165	0.066192	0.0110805	0.04	0.04	0.896687	0.983359
101–200	Jump	0.25	0.66	LOWESS	0.325541	0.19216	0.0236251	0.00160275	0.0699952	0.0106171	0.15	0.21	0.873742	0.974743
101–200	Jump	0.25	0.66	MA	2.45833	6.27179	0.0979144	0.0101145	0.12604	0.0170894	0	0	0.554127	0.850682
101–200	Jump	0.25	0.66	PELT	-0.25	0.0625	-0.0116073	0.000134734	-0.0609884	0.00371992	-1	1	0.764575	0.94012
101–200	Jump	0.25	0.66	PR	0.193251	0.147625	0.0145171	0.00125134	0.050613	0.00956919	-1	1	0.775216	0.933287
101–200	Jump	0.25	1	ARIMA	0.0338995	0.39934	0.00175893	0.000958016	-0.0245911	0.00652316	-0.81	0.81	0.845461	0.941289
101–200	Jump	0.25	1	FLSA	-0.030718	0.0520283	0.000486944	0.000244484	-0.011385	0.00288305	0.45	1.39	0.913684	0.919387
101–200	Jump	0.25	1	GAM	0.243358	0.150838	0.0154145	0.000896631	0.0536299	0.00819383	0.03	0.03	0.917983	0.987799
101–200	Jump	0.25	1	LOWESS	0.271717	0.138664	0.0168225	0.000934147	0.0570564	0.00761372	0.16	0.22	0.891175	0.978088
101–200	Jump	0.25	1	MA	2.24594	5.22076	0.0784448	0.00655871	0.107154	0.012421	0	0	0.599955	0.877732
101–200	Jump	0.25	1	PELT	-0.185484	0.107711	-0.00948368	0.000232831	-0.059073	0.00360192	-0.93	0.95	0.78477	0.94205
101–200	Jump	0.25	1	PR	0.168538	0.116377	0.0108003	0.000787954	0.0443872	0.00755919	-1	1	0.783433	0.9357
101–200	Jump	0.25	2	ARIMA	-0.0298318	0.223642	-0.00237277	0.00046331	-0.0303076	0.00514433	-0.81	0.81	0.842186	0.946112
101–200	Jump	0.25	2	FLSA	-0.0782839	0.041031	-0.00403996	0.000140622	-0.0231603	0.00221501	0.51	1.53	0.888658	0.912411
101–200	Jump	0.25	2	GAM	0.186177	0.0947924	0.00894536	0.000423344	0.043483	0.0054423	0.1	0.1	0.924768	0.987642
101–200	Jump	0.25	2	LOWESS	0.214929	0.0895203	0.0100622	0.000422209	0.0441568	0.00479135	0.18	0.18	0.907441	0.983895
101–200	Jump	0.25	2	MA	1.99504	4.11486	0.0582695	0.00363034	0.08478	0.00781257	0	0	0.654227	0.905756
101–200	Jump	0.25	2	PELT	-0.209872	0.104393	-0.0101513	0.000208181	-0.0585893	0.00367533	-0.93	1.03	0.781981	0.937644
101–200	Jump	0.25	2	PR	0.144494	0.0820087	0.00684563	0.000401665	0.0383293	0.00535097	-1	1	0.791638	0.938312
101–200	Jump	0.5	0.33	ARIMA	0.624779	2.04899	0.0556228	0.0246974	0.0441168	0.0380928	-0.49	0.49	0.786629	0.891354
101–200	Jump	0.5	0.33	FLSA	-0.100391	0.11185	-0.00854527	0.00229583	-0.0185287	0.0106685	0.86	1.86	0.829643	0.885535
101–200	Jump	0.5	0.33	GAM	0.454297	0.469775	0.0438795	0.00718766	0.0888456	0.0221052	0.05	0.05	0.849497	0.966011
101–200	Jump	0.5	0.33	LOWESS	0.412467	0.349328	0.0369767	0.00629744	0.0818595	0.0191912	0.12	0.12	0.852587	0.967526
101–200	Jump	0.5	0.33	MA	2.74816	7.92273	0.128507	0.0180889	0.128957	0.0203573	0	0	0.506491	0.811175
101–200	Jump	0.5	0.33	PELT	-0.472451	0.254933	-0.0458716	0.00212537	-0.121513	0.0147769	-0.97	0.97	0.693568	0.928259
101–200	Jump	0.5	0.33	PR	0.210617	0.271513	0.0159181	0.00511412	0.056941	0.0176851	-1	1	0.768979	0.922957
101–200	Jump	0.5	0.66	ARIMA	0.454038	1.44303	0.030121	0.0118543	0.0209281	0.0276302	-0.48	0.68	0.835651	0.906371
101–200	Jump	0.5	0.66	FLSA	-0.114298	0.101831	-0.014535	0.00149652	-0.0268642	0.00759982	1	2.1	0.7974	0.875146
101–200	Jump	0.5	0.66	GAM	0.356011	0.268606	0.0215427	0.00287766	0.0674072	0.0123501	0.04	0.04	0.889224	0.980553
101–200	Jump	0.5	0.66	LOWESS	0.306803	0.199851	0.0160853	0.00255765	0.0589468	0.0110234	0.15	0.15	0.887327	0.977214
101–200	Jump	0.5	0.66	MA	2.12151	4.71678	0.0659333	0.00506057	0.0796039	0.00886972	0	0	0.638583	0.891798
101–200	Jump	0.5	0.66	PELT	-0.47903	0.273004	-0.0449967	0.00222744	-0.121274	0.0147563	-0.99	0.99	0.690564	0.926793
101–200	Jump	0.5	0.66	PR	0.185546	0.169488	0.00508201	0.00240049	0.0506174	0.011148	-1	1	0.780996	0.931191
101–200	Jump	0.5	1	ARIMA	0.338782	1.10153	0.0175176	0.00787691	0.00748472	0.0230401	-0.53	0.53	0.856623	0.926274
101–200	Jump	0.5	1	FLSA	-0.222195	0.104746	-0.0284018	0.00138674	-0.0535301	0.00756002	0.75	1.71	0.802062	0.896635
101–200	Jump	0.5	1	GAM	0.321275	0.201504	0.0137797	0.00175713	0.0597774	0.00913035	0.06	0.06	0.899829	0.984002
101–200	Jump	0.5	1	LOWESS	0.271045	0.151866	0.00906085	0.0015893	0.0516242	0.00821835	0.21	0.21	0.891149	0.977634
101–200	Jump	0.5	1	MA	1.8929	3.763	0.0452198	0.00250685	0.0598397	0.00554559	0	0	0.68916	0.915433
101–200	Jump	0.5	1	PELT	-0.43021	0.271917	-0.0436699	0.00216468	-0.119775	0.0145053	-0.93	0.95	0.705897	0.929222
101–200	Jump	0.5	1	PR	0.17566	0.131755	0.00102138	0.00161995	0.0481228	0.00872727	-1	1	0.785649	0.93417
101–200	Jump	0.5	2	ARIMA	0.395057	1.06974	0.0246976	0.0129518	0.0199568	0.0238802	-0.46	0.46	0.849272	0.928343
101–200	Jump	0.5	2	FLSA	-0.220331	0.103751	-0.0312763	0.00136493	-0.0606481	0.00621242	0.94	1.88	0.767156	0.888344
101–200	Jump	0.5	2	GAM	0.276054	0.130532	0.00549656	0.000845984	0.0519449	0.00600984	0.08	0.08	0.91223	0.987372
101–200	Jump	0.5	2	LOWESS	0.231111	0.101982	0.00171961	0.000794306	0.0440457	0.00537527	0.23	0.25	0.901973	0.979152
101–200	Jump	0.5	2	MA	1.67268	2.92503	0.0255092	0.000855069	0.0384253	0.00273763	0	0	0.740356	0.93595
101–200	Jump	0.5	2	PELT	-0.457729	0.279019	-0.044452	0.00217216	-0.118914	0.0145178	-0.93	1.03	0.703008	0.924706
101–200	Jump	0.5	2	PR	0.163651	0.0922817	-0.00336944	0.000934053	0.0450926	0.00619059	-1	1	0.787484	0.937249
101–200	Jump	1	0.33	ARIMA	0.987947	3.25477	0.104082	0.0749714	0.0960117	0.0739444	-0.2	0.54	0.72913	0.820257
101–200	Jump	1	0.33	FLSA	-0.443554	0.359139	-0.117265	0.0192246	-0.0985864	0.0231625	0.86	1.96	0.690884	0.860385
101–200	Jump	1	0.33	GAM	0.621325	0.654342	0.0325291	0.0161387	0.100007	0.0248017	0.01	0.01	0.831571	0.959141
101–200	Jump	1	0.33	LOWESS	0.482965	0.442675	0.00940886	0.013319	0.0811406	0.0217548	0.19	0.25	0.847297	0.954124
101–200	Jump	1	0.33	MA	2.05725	4.51272	0.0031781	0.00442923	0.0416537	0.00961025	0	0	0.696406	0.895622
101–200	Jump	1	0.33	PELT	-0.966181	0.976922	-0.184976	0.0342474	-0.243396	0.0592602	-0.97	0.97	0.51737	0.86773
101–200	Jump	1	0.33	PR	0.405807	0.574488	0.00344206	0.0200248	0.0923102	0.0274296	-0.87	0.87	0.752689	0.911249
101–200	Jump	1	0.66	ARIMA	1.00748	2.47501	0.0953136	0.0431571	0.10758	0.0548958	-0.06	0.68	0.74185	0.853729
101–200	Jump	1	0.66	FLSA	-0.486551	0.384358	-0.125397	0.019919	-0.112548	0.0215498	0.99	2.07	0.65627	0.854982
101–200	Jump	1	0.66	GAM	0.539153	0.425172	0.00563636	0.00708001	0.0790501	0.0144197	0.09	0.13	0.857886	0.969247
101–200	Jump	1	0.66	LOWESS	0.410581	0.279964	-0.0135957	0.00656006	0.0663051	0.0129239	0.27	0.31	0.85234	0.963888
101–200	Jump	1	0.66	MA	1.53534	2.56434	-0.0516302	0.00477124	0.00111577	0.00532227	0	0	0.772196	0.940074
101–200	Jump	1	0.66	PELT	-0.858709	1.03526	-0.163806	0.0335812	-0.226781	0.0559122	-0.91	0.95	0.552197	0.870531
101–200	Jump	1	0.66	PR	0.397601	0.413691	-0.0116345	0.0108353	0.0746518	0.0154972	-0.81	0.81	0.768891	0.930413
101–200	Jump	1	1	ARIMA	1.04118	2.01762	0.094598	0.0323467	0.125727	0.0467643	0.06	0.66	0.726223	0.873782
101–200	Jump	1	1	FLSA	-0.559709	0.438839	-0.13799	0.0220938	-0.131432	0.025113	0.87	2.05	0.649698	0.851652
101–200	Jump	1	1	GAM	0.505698	0.345249	-0.00427877	0.00456738	0.0703652	0.0109204	0.09	0.09	0.868808	0.976906
101–200	Jump	1	1	LOWESS	0.370292	0.222322	-0.0230441	0.00482401	0.0605339	0.00983731	0.27	0.27	0.856413	0.97045
101–200	Jump	1	1	MA	1.34703	2.02763	-0.0689227	0.00604173	-0.0130221	0.00409964	0	0	0.780728	0.951984
101–200	Jump	1	1	PELT	-0.710669	0.966625	-0.142899	0.0314204	-0.205559	0.0511672	-0.76	0.86	0.606169	0.881066
101–200	Jump	1	1	PR	0.346524	0.296396	-0.0253256	0.00792866	0.0650102	0.0112717	-0.83	0.83	0.770482	0.936083
101–200	Jump	1	2	ARIMA	0.985812	1.35271	0.0850412	0.0178179	0.137721	0.0331587	0.1	0.26	0.724321	0.923756
101–200	Jump	1	2	FLSA	-0.607947	0.450222	-0.149527	0.0237973	-0.143749	0.0253385	0.83	1.71	0.638293	0.869024
101–200	Jump	1	2	GAM	0.456005	0.258619	-0.0155088	0.00258263	0.0622942	0.0075358	0.12	0.12	0.870694	0.980621
101–200	Jump	1	2	LOWESS	0.334035	0.169455	-0.0320527	0.00338679	0.0552582	0.006776	0.31	0.35	0.853672	0.970213
101–200	Jump	1	2	MA	1.10353	1.39304	-0.0846618	0.00778535	-0.024317	0.00277819	0	0	0.797051	0.96587
101–200	Jump	1	2	PELT	-0.573939	0.784266	-0.118377	0.0258509	-0.18268	0.0432732	-0.64	0.78	0.659974	0.897045
101–200	Jump	1	2	PR	0.346034	0.2326	-0.0308148	0.00525921	0.0543505	0.00733233	-0.78	0.78	0.781612	0.944214
101–200	Jump	2	0.33	ARIMA	1.97354	4.41399	0.284267	0.166533	0.281969	0.0983667	0.25	0.59	0.434418	0.750255
101–200	Jump	2	0.33	FLSA	-1.06503	1.65149	-0.518963	0.329635	-0.244483	0.0909809	0.86	1.98	0.391653	0.693075
101–200	Jump	2	0.33	GAM	0.960438	1.16156	-0.0463552	0.051579	0.115862	0.031411	0.03	0.03	0.767898	0.930774
101–200	Jump	2	0.33	LOWESS	0.775816	0.790758	-0.0979213	0.0496553	0.103617	0.027055	0.31	0.31	0.737697	0.927789
101–200	Jump	2	0.33	MA	1.14705	1.62147	-0.431415	0.205319	-0.0802647	0.0218395	0.06	0.06	0.594016	0.880038
101–200	Jump	2	0.33	PELT	-0.356372	1.354	-0.114185	0.221155	-0.131818	0.0804489	-0.24	0.34	0.772418	0.81939
101–200	Jump	2	0.33	PR	0.954447	1.35021	-0.0297904	0.0745283	0.13694	0.0380698	-0.49	0.49	0.702057	0.890167
101–200	Jump	2	0.66	ARIMA	1.57392	2.66037	0.215353	0.0841906	0.250447	0.0705126	0.3	0.94	0.512896	0.812567
101–200	Jump	2	0.66	FLSA	-1.21248	1.9296	-0.562775	0.359214	-0.291123	0.111595	0.6	1.54	0.374323	0.68727
101–200	Jump	2	0.66	GAM	0.885659	0.903624	-0.0778049	0.030566	0.092429	0.018593	0.11	0.11	0.767981	0.949349
101–200	Jump	2	0.66	LOWESS	0.725854	0.616664	-0.118632	0.0319639	0.0894634	0.0171034	0.33	0.33	0.739864	0.944216
101–200	Jump	2	0.66	MA	0.585404	0.542068	-0.478075	0.238195	-0.099796	0.0188812	0.15	0.17	0.604978	0.88704
101–200	Jump	2	0.66	PELT	0.076632	0.0561943	0.0391532	0.0269555	-0.00186939	0.00402325	0.01	0.01	0.965337	0.985974
101–200	Jump	2	0.66	PR	0.922664	1.00008	-0.0435293	0.0296615	0.0853045	0.0197724	-0.31	0.31	0.756304	0.93595
101–200	Jump	2	1	ARIMA	1.40701	2.10104	0.192722	0.0637453	0.239739	0.063737	0.08	0.22	0.569349	0.870846
101–200	Jump	2	1	FLSA	-1.21955	1.83145	-0.576239	0.368575	-0.293551	0.107563	0.57	1.31	0.371206	0.700119
101–200	Jump	2	1	GAM	0.863567	0.822274	-0.0873849	0.0237133	0.0815035	0.0136986	0.13	0.13	0.770634	0.956304
101–200	Jump	2	1	LOWESS	0.705417	0.564656	-0.12503	0.0279633	0.0834174	0.0134919	0.36	0.36	0.738658	0.947968
101–200	Jump	2	1	MA	0.382876	0.307583	-0.49454	0.251353	-0.106742	0.0181089	0.2	0.2	0.605363	0.886287
101–200	Jump	2	1	PELT	0.150176	0.193349	0.0275722	0.0170734	-0.00482596	0.00298488	0.12	0.14	0.94218	0.980061
101–200	Jump	2	1	PR	0.886715	0.894481	-0.0519781	0.0236976	0.069608	0.0133024	-0.24	0.32	0.776544	0.944918
101–200	Jump	2	2	ARIMA	1.23353	1.57681	0.154184	0.0362032	0.216708	0.0499233	0.01	0.01	0.626344	0.91218
101–200	Jump	2	2	FLSA	-1.16727	1.69897	-0.558874	0.339708	-0.282731	0.100233	0.57	1.57	0.38591	0.703119
101–200	Jump	2	2	GAM	0.836835	0.743677	-0.09654	0.017421	0.0693057	0.0087626	0.16	0.16	0.77328	0.962529
101–200	Jump	2	2	LOWESS	0.701627	0.531297	-0.126693	0.0219103	0.0770786	0.00982164	0.35	0.35	0.743538	0.954226
101–200	Jump	2	2	MA	0.155012	0.152343	-0.510449	0.264747	-0.112805	0.0171833	0.37	0.37	0.589903	0.876375
101–200	Jump	2	2	PELT	0.0550155	0.0525896	0.00846217	0.00957205	-0.00602368	0.0023371	0.07	0.17	0.972339	0.984324
101–200	Jump	2	2	PR	0.972989	1.01082	-0.0325594	0.0097977	0.0385407	0.00514588	0.04	0.1	0.823078	0.965773
101–200	Linear	0.25	0.33	ARIMA	-0.0631908	0.275305	0.000273674	0.00142614	-0.0608658	0.0108062	-1.87	3.61	0.653486	0.786883
101–200	Linear	0.25	0.33	FLSA	-0.0933123	0.0392622	-0.00516355	0.000119092	-0.0468467	0.0041263	-0.38	1.46	0.892011	0.91481
101–200	Linear	0.25	0.33	GAM	0.0628612	0.0536878	0.000710687	0.00022326	-0.0125772	0.00322085	-1	1	0.818743	0.940673
101–200	Linear	0.25	0.33	LOWESS	0.139163	0.0602628	0.00437557	0.000234654	0.0024781	0.00223714	-0.8	0.94	0.846759	0.944666
101–200	Linear	0.25	0.33	MA	3.15436	10.331	0.154793	0.0261476	0.120822	0.0151493	-1	1	0.371427	0.720577
101–200	Linear	0.25	0.33	PELT	-0.252169	0.0635948	-0.0119616	0.00014308	-0.0911749	0.00831313	-2	4	0.596341	0.771095
101–200	Linear	0.25	0.33	PR	0.0580805	0.0523407	0.000356036	0.000218273	-0.0131113	0.00323344	-2	4	0.655289	0.774675
101–200	Linear	0.25	0.66	ARIMA	-0.118908	0.195097	-0.00377928	0.000809537	-0.0695018	0.00970475	-1.9	3.7	0.637778	0.784253
101–200	Linear	0.25	0.66	FLSA	-0.17705	0.0442041	-0.00979416	0.000121761	-0.0707605	0.00574854	-0.8	2.02	0.798876	0.882496
101–200	Linear	0.25	0.66	GAM	-0.0179907	0.0337979	-0.00448831	0.000106803	-0.0327	0.00313777	-0.99	0.99	0.811721	0.941728
101–200	Linear	0.25	0.66	LOWESS	0.0434129	0.0312153	-0.00222233	8.59065e-05	-0.0210632	0.00212197	-0.76	0.88	0.854383	0.948712
101–200	Linear	0.25	0.66	MA	2.54869	6.75835	0.0973887	0.0102285	0.0785524	0.00652167	-1	1	0.472797	0.802227
101–200	Linear	0.25	0.66	PELT	-0.251728	0.0633935	-0.0119611	0.000143069	-0.0911639	0.00831115	-1.99	3.97	0.597891	0.772752
101–200	Linear	0.25	0.66	PR	-0.0250709	0.0346575	-0.00470828	0.000109573	-0.0340446	0.0032756	-2	4	0.646229	0.77497
101–200	Linear	0.25	1	ARIMA	-0.0152602	0.318151	0.00229156	0.00143184	-0.0545638	0.0105592	-1.84	3.52	0.66459	0.791255
101–200	Linear	0.25	1	FLSA	-0.128377	0.0300862	-0.00845034	9.6575e-05	-0.0566384	0.00402298	-0.16	1.22	0.914227	0.928355
101–200	Linear	0.25	1	GAM	-0.0432288	0.0283207	-0.00603194	8.91519e-05	-0.038913	0.00315663	-0.98	0.98	0.806138	0.94238
101–200	Linear	0.25	1	LOWESS	0.0149868	0.0224682	-0.00417942	6.55642e-05	-0.0283353	0.00209845	-0.83	0.91	0.840822	0.94725
101–200	Linear	0.25	1	MA	2.29732	5.50263	0.077261	0.00641704	0.0615858	0.0040697	-1	1	0.51527	0.83014
101–200	Linear	0.25	1	PELT	-0.252169	0.0635948	-0.0119616	0.00014308	-0.0911749	0.00831313	-2	4	0.596341	0.771095
101–200	Linear	0.25	1	PR	-0.0507867	0.0302324	-0.00618533	9.20318e-05	-0.0405156	0.00335616	-2	4	0.640199	0.774994
101–200	Linear	0.25	2	ARIMA	0.14874	0.463747	0.00917179	0.00152174	-0.0316478	0.0106666	-1.72	3.16	0.67875	0.808314
101–200	Linear	0.25	2	FLSA	-0.137942	0.0290604	-0.00919355	9.45353e-05	-0.0594459	0.00415985	-0.13	1.27	0.915432	0.925499
101–200	Linear	0.25	2	GAM	-0.05331	0.0188364	-0.00725674	7.78329e-05	-0.0414179	0.00271648	-0.99	0.99	0.801316	0.942379
101–200	Linear	0.25	2	LOWESS	-0.00102874	0.0120721	-0.00576619	5.54864e-05	-0.033442	0.0018112	-0.83	0.85	0.838526	0.951024
101–200	Linear	0.25	2	MA	2.07622	4.49225	0.0581157	0.00361727	0.043483	0.00209296	-1	1	0.555778	0.852576
101–200	Linear	0.25	2	PELT	-0.230448	0.0706302	-0.0112782	0.000157749	-0.0903933	0.00820681	-1.97	3.91	0.603483	0.776004
101–200	Linear	0.25	2	PR	-0.0585593	0.0206173	-0.00732646	7.93647e-05	-0.0424616	0.00286716	-2	4	0.638011	0.775485
101–200	Linear	0.5	0.33	ARIMA	-0.25381	0.579512	-0.0319324	0.003587	-0.149637	0.0303376	-1.86	3.58	0.580112	0.769191
101–200	Linear	0.5	0.33	FLSA	-0.326853	0.134854	-0.0388862	0.00163604	-0.124694	0.0180927	-0.52	1.46	0.77619	0.901368
101–200	Linear	0.5	0.33	GAM	-0.00353831	0.104096	-0.0177363	0.00134228	-0.0568484	0.00972566	-0.97	0.97	0.795568	0.935642
101–200	Linear	0.5	0.33	LOWESS	0.0572516	0.0860297	-0.0132779	0.00116284	-0.0445429	0.00734538	-0.87	0.87	0.815099	0.943517
101–200	Linear	0.5	0.33	MA	2.77902	8.14078	0.113167	0.0150259	0.0380303	0.00214698	-1	1	0.465418	0.777171
101–200	Linear	0.5	0.33	PELT	-0.504338	0.254379	-0.0478464	0.00228928	-0.18235	0.0332525	-2	4	0.516558	0.750508
101–200	Linear	0.5	0.33	PR	-0.0284864	0.116767	-0.0188529	0.00142341	-0.0626497	0.0110874	-2	4	0.625317	0.767944
101–200	Linear	0.5	0.66	ARIMA	-0.109355	0.577491	-0.0261791	0.00275703	-0.129525	0.0263858	-1.75	3.25	0.621655	0.789917
101–200	Linear	0.5	0.66	FLSA	-0.264012	0.106307	-0.0336133	0.00140347	-0.104341	0.0143754	-0.05	1.15	0.86873	0.921918
101–200	Linear	0.5	0.66	GAM	0.00823958	0.0528462	-0.0210419	0.000925255	-0.0543454	0.0062754	-0.99	0.99	0.791509	0.938516
101–200	Linear	0.5	0.66	LOWESS	0.0450499	0.0458227	-0.0177973	0.000787651	-0.0487987	0.00525875	-0.88	0.88	0.80997	0.945609
101–200	Linear	0.5	0.66	MA	2.15145	4.91471	0.0581162	0.00412651	-0.000351073	0.000468416	-1	1	0.571609	0.845385
101–200	Linear	0.5	0.66	PELT	-0.50385	0.253915	-0.0478458	0.00228923	-0.182338	0.0332481	-1.99	3.97	0.51795	0.752129
101–200	Linear	0.5	0.66	PR	-0.0120175	0.0624505	-0.0220173	0.000997793	-0.0584773	0.00724059	-2	4	0.626957	0.771558
101–200	Linear	0.5	1	ARIMA	-0.0930602	0.516133	-0.0264434	0.00236504	-0.125436	0.0250705	-1.72	3.16	0.629489	0.796865
101–200	Linear	0.5	1	FLSA	-0.253937	0.0893918	-0.0328048	0.0012624	-0.098026	0.0124429	0.01	1.15	0.88067	0.923861
101–200	Linear	0.5	1	GAM	0.018242	0.034373	-0.0217438	0.000781385	-0.0524079	0.00493297	-1	1	0.789537	0.939474
101–200	Linear	0.5	1	LOWESS	0.0455207	0.0313779	-0.0188321	0.000657726	-0.0494063	0.00438627	-0.87	0.87	0.81061	0.947211
101–200	Linear	0.5	1	MA	1.92749	3.94596	0.0392597	0.00195878	-0.0150377	0.000544837	-1	1	0.59504	0.865159
101–200	Linear	0.5	1	PELT	-0.49164	0.257806	-0.0469671	0.00228261	-0.181621	0.0330414	-1.99	3.97	0.519705	0.752207
101–200	Linear	0.5	1	PR	0.00295744	0.0398367	-0.0226339	0.000844077	-0.0546924	0.00541978	-2	4	0.629126	0.773202
101–200	Linear	0.5	2	ARIMA	0.106721	0.727757	-0.00985962	0.0073846	-0.0904073	0.0237753	-1.59	2.77	0.673637	0.813429
101–200	Linear	0.5	2	FLSA	-0.278538	0.10307	-0.0343023	0.00133045	-0.104104	0.0134532	-0.19	1.23	0.845876	0.918369
101–200	Linear	0.5	2	GAM	0.0302942	0.0179651	-0.0219362	0.000631838	-0.0493635	0.00355368	-1	1	0.789843	0.940976
101–200	Linear	0.5	2	LOWESS	0.048205	0.0178065	-0.0191976	0.000515604	-0.0487465	0.00337165	-0.8	0.8	0.821698	0.952241
101–200	Linear	0.5	2	MA	1.67224	2.98503	0.0198325	0.000656319	-0.0317946	0.00122652	-1	1	0.621371	0.884045
101–200	Linear	0.5	2	PELT	-0.477676	0.253523	-0.0468867	0.00225594	-0.181413	0.0329617	-1.97	3.91	0.523731	0.755559
101–200	Linear	0.5	2	PR	0.0219517	0.0197494	-0.0226837	0.00067789	-0.0498915	0.0036555	-2	4	0.629614	0.774772
101–200	Linear	1	0.33	ARIMA	0.307605	2.81873	-0.0440819	0.0694985	-0.164856	0.0862759	-1.54	2.64	0.60761	0.719329
101–200	Linear	1	0.33	FLSA	-0.530345	0.362554	-0.134022	0.0202655	-0.195288	0.0479916	-0.1	0.98	0.722174	0.892747
101–200	Linear	1	0.33	GAM	0.153933	0.132889	-0.065238	0.00914909	-0.0741019	0.0126236	-0.98	0.98	0.743049	0.929621
101–200	Linear	1	0.33	LOWESS	0.170818	0.133047	-0.0573681	0.00846377	-0.0701406	0.0122606	-0.87	0.87	0.764536	0.936165
101–200	Linear	1	0.33	MA	1.96357	4.31491	-0.00790276	0.00225883	-0.078803	0.00942869	-1	1	0.567372	0.8505
101–200	Linear	1	0.33	PELT	-1.00034	1.00779	-0.190086	0.0363012	-0.362652	0.131948	-1.99	3.97	0.346911	0.663613
101–200	Linear	1	0.33	PR	0.125324	0.14921	-0.0709378	0.0103831	-0.0793298	0.0143485	-2	4	0.582403	0.762324
101–200	Linear	1	0.66	ARIMA	0.680554	1.86665	-0.0208983	0.0287461	-0.0793231	0.0422882	-1.23	1.75	0.669578	0.825621
101–200	Linear	1	0.66	FLSA	-0.56541	0.406454	-0.135067	0.020742	-0.205139	0.0531037	-0.13	1.13	0.707386	0.879699
101–200	Linear	1	0.66	GAM	0.176974	0.0826994	-0.0638037	0.00639865	-0.068402	0.008192	-0.97	0.97	0.746035	0.935676
101–200	Linear	1	0.66	LOWESS	0.179703	0.0863457	-0.0577314	0.00582656	-0.0662089	0.00809048	-0.86	0.86	0.76716	0.94193
101–200	Linear	1	0.66	MA	1.36003	2.12106	-0.0554162	0.00410746	-0.101225	0.0125376	-1	1	0.601275	0.890858
101–200	Linear	1	0.66	PELT	-0.991649	0.995048	-0.189152	0.0360432	-0.360458	0.130803	-1.96	3.9	0.351832	0.668019
101–200	Linear	1	0.66	PR	0.158389	0.088701	-0.0703025	0.00752773	-0.0709726	0.0088066	-2	4	0.583592	0.767951
101–200	Linear	1	1	ARIMA	0.967591	1.62088	0.024964	0.0241454	0.00462529	0.0162231	-0.98	1.12	0.71427	0.885144
101–200	Linear	1	1	FLSA	-0.62182	0.475069	-0.14247	0.0225194	-0.222441	0.0605187	-0.43	1.37	0.648489	0.859337
101–200	Linear	1	1	GAM	0.186034	0.0675114	-0.0620349	0.00535348	-0.065525	0.00660094	-0.97	0.97	0.747577	0.937618
101–200	Linear	1	1	LOWESS	0.185988	0.071127	-0.056839	0.00482919	-0.0635046	0.00643332	-0.84	0.84	0.771577	0.945026
101–200	Linear	1	1	MA	1.17063	1.56896	-0.0688895	0.00547361	-0.109004	0.0137737	-1	1	0.611417	0.900353
101–200	Linear	1	1	PELT	-0.944124	0.977673	-0.181232	0.0349166	-0.349031	0.127122	-1.93	3.83	0.365862	0.674462
101–200	Linear	1	1	PR	0.173364	0.070881	-0.0691982	0.00645546	-0.0671876	0.00690459	-2	4	0.584553	0.769867
101–200	Linear	1	2	ARIMA	0.991152	1.33592	0.044526	0.0147955	0.0412502	0.00662148	-0.9	0.98	0.692949	0.908918
101–200	Linear	1	2	FLSA	-0.584799	0.423071	-0.138505	0.021552	-0.211166	0.0543308	-0.07	1.13	0.707579	0.878135
101–200	Linear	1	2	GAM	0.192541	0.0544108	-0.0582763	0.00413294	-0.0610184	0.0048614	-0.97	0.97	0.751331	0.939699
101–200	Linear	1	2	LOWESS	0.196587	0.0579172	-0.0548858	0.00377942	-0.0593788	0.00466123	-0.85	0.85	0.772227	0.94654
101–200	Linear	1	2	MA	0.918515	0.953116	-0.0772558	0.00627814	-0.109224	0.0127622	-0.99	0.99	0.635555	0.91365
101–200	Linear	1	2	PELT	-0.849249	0.906971	-0.17144	0.0327718	-0.334369	0.120728	-1.81	3.57	0.395694	0.693185
101–200	Linear	1	2	PR	0.192359	0.0568743	-0.0670652	0.00531254	-0.0623868	0.00503731	-2	4	0.586153	0.771722
101–200	Linear	2	0.33	ARIMA	1.60347	3.67012	0.0645672	0.115834	0.0529647	0.0194931	-0.87	0.95	0.614459	0.823779
101–200	Linear	2	0.33	FLSA	-1.29099	1.98705	-0.59	0.381306	-0.459656	0.251878	-0.29	1.21	0.318588	0.597786
101–200	Linear	2	0.33	GAM	0.433722	0.284849	-0.184978	0.0574697	-0.0929118	0.0165009	-0.92	0.92	0.653153	0.91117
101–200	Linear	2	0.33	LOWESS	0.469836	0.346962	-0.17949	0.0564005	-0.0909707	0.016498	-0.83	0.83	0.666369	0.915195
101–200	Linear	2	0.33	MA	1.24521	1.84286	-0.299715	0.0990868	-0.181238	0.0396247	-0.84	0.84	0.49172	0.85358
101–200	Linear	2	0.33	PELT	-0.977915	1.82301	-0.319243	0.268416	-0.345553	0.239537	-1.41	2.29	0.370894	0.591898
101–200	Linear	2	0.33	PR	0.466138	0.354975	-0.229776	0.0771361	-0.10432	0.0187782	-2	4	0.466626	0.734608
101–200	Linear	2	0.66	ARIMA	1.33192	2.35941	0.0754369	0.0475393	0.0733887	0.0127235	-0.89	0.91	0.62525	0.877285
101–200	Linear	2	0.66	FLSA	-1.27105	1.87424	-0.592981	0.380515	-0.447886	0.235661	-0.06	1.1	0.344443	0.615856
101–200	Linear	2	0.66	GAM	0.397325	0.208715	-0.160628	0.0370743	-0.0797443	0.0103284	-0.82	0.82	0.690467	0.929716
101–200	Linear	2	0.66	LOWESS	0.472783	0.284619	-0.169366	0.0402591	-0.0830407	0.0107303	-0.86	0.86	0.670797	0.924668
101–200	Linear	2	0.66	MA	0.893058	0.938327	-0.327579	0.11205	-0.179152	0.035403	-0.75	0.75	0.524806	0.875139
101–200	Linear	2	0.66	PELT	-0.222709	0.161881	-0.0633998	0.0146572	-0.0973137	0.0170218	-0.96	0.96	0.726839	0.924774
101–200	Linear	2	0.66	PR	0.521805	0.337864	-0.208299	0.0560523	-0.0938212	0.0125522	-1.93	3.79	0.486989	0.75719
101–200	Linear	2	1	ARIMA	1.16116	1.56045	0.0622871	0.0189062	0.0763935	0.00971266	-0.87	0.91	0.650403	0.9044
101–200	Linear	2	1	FLSA	-1.39214	2.15753	-0.634034	0.421295	-0.491912	0.273035	-0.25	1.25	0.287845	0.569075
101–200	Linear	2	1	GAM	0.3868	0.184523	-0.148367	0.0292306	-0.0739289	0.0080918	-0.74	0.74	0.712747	0.938962
101–200	Linear	2	1	LOWESS	0.465871	0.254074	-0.162155	0.0338909	-0.0790778	0.00866886	-0.83	0.83	0.681544	0.930655
101–200	Linear	2	1	MA	0.760147	0.674186	-0.336652	0.116447	-0.177434	0.0335586	-0.75	0.75	0.533954	0.88034
101–200	Linear	2	1	PELT	-0.25537	0.104077	-0.0748582	0.0132808	-0.100377	0.0161343	-0.93	0.93	0.720409	0.928725
101–200	Linear	2	1	PR	0.554072	0.343615	-0.182384	0.0435126	-0.0866391	0.0101195	-1.79	3.37	0.520075	0.785733
101–200	Linear	2	2	ARIMA	1.07688	1.27376	0.0758435	0.0134088	0.0864535	0.00908271	-0.76	1.04	0.662504	0.905363
101–200	Linear	2	2	FLSA	-1.39229	2.19889	-0.627617	0.418111	-0.493742	0.278021	-0.25	1.33	0.288761	0.562543
101–200	Linear	2	2	GAM	0.380524	0.163936	-0.132802	0.0210882	-0.0668759	0.00578024	-0.66	0.66	0.737141	0.948331
101–200	Linear	2	2	LOWESS	0.469976	0.240922	-0.153113	0.0271077	-0.0745304	0.00666203	-0.86	0.86	0.683572	0.933108
101–200	Linear	2	2	MA	0.615999	0.437585	-0.344548	0.120234	-0.1753	0.0316701	-0.79	0.81	0.539335	0.882006
101–200	Linear	2	2	PELT	-0.233612	0.101636	-0.0760077	0.0105404	-0.105658	0.0156524	-0.88	0.88	0.726699	0.932787
101–200	Linear	2	2	PR	0.554198	0.320635	-0.148283	0.0301918	-0.0771231	0.00762204	-1.53	2.59	0.578404	0.834916
101–200	Quadratic	0.25	0.33	ARIMA	0.738506	2.32	0.0841004	0.0280309	0.0786035	0.041737	-2.6	7	0.440609	0.550838
101–200	Quadratic	0.25	0.33	FLSA	0.0945103	0.0883757	0.0171057	0.00127426	0.024078	0.00620916	-0.99	2.17	0.801388	0.87267
101–200	Quadratic	0.25	0.33	GAM	0.142482	0.181177	0.0125766	0.00197145	0.0269518	0.00618856	-1.99	3.97	0.636501	0.771662
101–200	Quadratic	0.25	0.33	LOWESS	0.214589	0.0906121	0.0137417	0.000513876	0.0407852	0.00372075	-1.83	3.55	0.648388	0.798497
101–200	Quadratic	0.25	0.33	MA	3.27836	11.2306	0.176368	0.0327059	0.159152	0.0256996	-2	4	0.258195	0.569098
101–200	Quadratic	0.25	0.33	PELT	-0.194658	0.29588	-0.00423502	0.000753848	-0.0622316	0.0039966	-2.95	8.83	0.471144	0.504272
101–200	Quadratic	0.25	0.33	PR	0.11572	0.222283	0.0094523	0.00132562	0.0197028	0.00375805	-2.99	8.95	0.482017	0.498364
101–200	Quadratic	0.25	0.66	ARIMA	0.60455	1.37665	0.0524673	0.00997876	0.0619246	0.0247936	-2.52	6.6	0.48298	0.598321
101–200	Quadratic	0.25	0.66	FLSA	-0.0214745	0.0369591	0.00486684	0.000287525	0.00214356	0.00269655	-1.08	2.3	0.813749	0.869415
101–200	Quadratic	0.25	0.66	GAM	0.0476482	0.0958058	0.00464723	0.000685493	0.00585631	0.00351854	-2	4	0.657188	0.77362
101–200	Quadratic	0.25	0.66	LOWESS	0.0968947	0.0336938	0.00445178	0.000131571	0.0143069	0.00124835	-1.81	3.49	0.680018	0.804627
101–200	Quadratic	0.25	0.66	MA	2.55807	6.85064	0.108373	0.0123491	0.112081	0.0128036	-2	4	0.353164	0.653852
101–200	Quadratic	0.25	0.66	PELT	-0.244901	0.0634939	-0.0069702	4.95276e-05	-0.0631548	0.00402369	-2.98	8.92	0.461416	0.501999
101–200	Quadratic	0.25	0.66	PR	0.0368385	0.134063	0.00304185	0.000499309	0.00171583	0.0020371	-2.99	8.95	0.496933	0.500313
101–200	Quadratic	0.25	1	ARIMA	0.510086	0.98309	0.0377693	0.0052007	0.0484897	0.0177006	-2.49	6.45	0.50685	0.616943
101–200	Quadratic	0.25	1	FLSA	-0.0535121	0.0299109	0.00134708	0.000190092	-0.00792895	0.00214501	-1.05	2.03	0.813873	0.884955
101–200	Quadratic	0.25	1	GAM	0.00743843	0.0673264	0.00180999	0.000362488	-0.00253977	0.00265125	-2	4	0.663834	0.774775
101–200	Quadratic	0.25	1	LOWESS	0.0492296	0.0219618	0.0016573	7.02418e-05	0.00405845	0.000843762	-1.79	3.39	0.694194	0.810676
101–200	Quadratic	0.25	1	MA	2.29205	5.48511	0.0844387	0.00749303	0.0921481	0.0086779	-2	4	0.39137	0.680198
101–200	Quadratic	0.25	1	PELT	-0.250106	0.0626064	-0.00706688	4.99412e-05	-0.0637374	0.00406253	-2.99	8.95	0.459282	0.500332
101–200	Quadratic	0.25	1	PR	0.00459109	0.104882	0.000889734	0.000302418	-0.00555546	0.00164409	-2.99	8.95	0.498944	0.500856
101–200	Quadratic	0.25	2	ARIMA	0.334055	0.57507	0.0203188	0.00207885	0.0220758	0.0103593	-2.51	6.55	0.536331	0.622057
101–200	Quadratic	0.25	2	FLSA	-0.0820034	0.023075	-0.00163706	4.63286e-05	-0.0168668	0.00144252	-0.96	1.92	0.820169	0.89177
101–200	Quadratic	0.25	2	GAM	-0.0272946	0.0428366	-0.000525638	0.000140851	-0.00993668	0.00194489	-2	4	0.659385	0.775723
101–200	Quadratic	0.25	2	LOWESS	0.00795184	0.021634	-9.73792e-05	5.94665e-05	-0.00458071	0.00100761	-1.78	3.52	0.700312	0.803358
101–200	Quadratic	0.25	2	MA	1.94407	3.96736	0.0598912	0.00378689	0.0698006	0.00501558	-2	4	0.439076	0.708475
101–200	Quadratic	0.25	2	PELT	-0.231243	0.0697133	-0.00680781	5.03682e-05	-0.0634422	0.00402912	-2.97	8.85	0.46385	0.5058
101–200	Quadratic	0.25	2	PR	-0.0298211	0.0758371	-0.0011663	0.000153454	-0.0131445	0.00138406	-2.99	8.95	0.494485	0.501325
101–200	Quadratic	0.5	0.33	ARIMA	0.675085	2.1134	0.0750432	0.0264382	0.0447671	0.0359397	-2.47	6.35	0.480619	0.590339
101–200	Quadratic	0.5	0.33	FLSA	-0.194538	0.0931782	-0.00675888	0.00080216	-0.0415213	0.00684981	-0.97	2.21	0.789062	0.870043
101–200	Quadratic	0.5	0.33	GAM	-0.0649135	0.188904	-0.00399506	0.00255927	-0.0280135	0.0077396	-1.95	3.85	0.65396	0.776895
101–200	Quadratic	0.5	0.33	LOWESS	-0.0127928	0.0605024	-0.00537064	0.000430064	-0.0184999	0.00241393	-1.84	3.52	0.680356	0.801601
101–200	Quadratic	0.5	0.33	MA	3.05604	9.78228	0.158207	0.0265678	0.0982306	0.010116	-2	4	0.304225	0.604355
101–200	Quadratic	0.5	0.33	PELT	-0.419038	0.499209	-0.0235513	0.00164992	-0.123469	0.016014	-2.93	8.75	0.42829	0.50085
101–200	Quadratic	0.5	0.33	PR	-0.140963	0.231737	-0.0125265	0.00136363	-0.0454301	0.00515917	-2.99	8.95	0.469911	0.497642
101–200	Quadratic	0.5	0.66	ARIMA	0.39612	1.12226	0.0311908	0.0078205	0.00319295	0.0195414	-2.46	6.3	0.541216	0.621223
101–200	Quadratic	0.5	0.66	FLSA	-0.286126	0.109356	-0.0168485	0.000539426	-0.0649371	0.00680262	-1	2	0.755674	0.881438
101–200	Quadratic	0.5	0.66	GAM	-0.135747	0.13203	-0.0109457	0.00124856	-0.0422328	0.00678641	-1.9	3.74	0.645275	0.784965
101–200	Quadratic	0.5	0.66	LOWESS	-0.0940411	0.0630325	-0.0114619	0.000407759	-0.0359545	0.00328268	-1.87	3.61	0.656503	0.795981
101–200	Quadratic	0.5	0.66	MA	2.31418	5.62595	0.0866943	0.00808038	0.0505004	0.00284362	-2	4	0.406535	0.681652
101–200	Quadratic	0.5	0.66	PELT	-0.501702	0.251714	-0.0282706	0.000799236	-0.127496	0.0162555	-3	9	0.409342	0.490064
101–200	Quadratic	0.5	0.66	PR	-0.192978	0.17692	-0.0170196	0.00081574	-0.0566531	0.00541178	-2.99	8.95	0.460319	0.498289
101–200	Quadratic	0.5	1	ARIMA	0.278354	0.800398	0.0182033	0.00463177	-0.012389	0.0159174	-2.47	6.35	0.551856	0.625952
101–200	Quadratic	0.5	1	FLSA	-0.281924	0.113743	-0.0163665	0.000562546	-0.0648778	0.00704565	-0.93	1.97	0.767121	0.882814
101–200	Quadratic	0.5	1	GAM	-0.136036	0.11546	-0.0102838	0.000978782	-0.0392343	0.00673971	-1.78	3.74	0.666099	0.785361
101–200	Quadratic	0.5	1	LOWESS	-0.113083	0.0668703	-0.0122566	0.000415271	-0.0401859	0.00385037	-1.9	3.76	0.647575	0.787228
101–200	Quadratic	0.5	1	MA	2.01931	4.3112	0.0627374	0.00432567	0.0315237	0.00124487	-2	4	0.448348	0.705243
101–200	Quadratic	0.5	1	PELT	-0.487691	0.254967	-0.0279312	0.000791597	-0.12712	0.0161736	-2.97	8.87	0.414767	0.49715
101–200	Quadratic	0.5	1	PR	-0.209761	0.157819	-0.0183034	0.000684936	-0.0600307	0.0055894	-2.99	8.95	0.457408	0.498456
101–200	Quadratic	0.5	2	ARIMA	0.0606382	0.480764	-0.00131679	0.00179404	-0.0452013	0.0121596	-2.53	6.65	0.554922	0.616976
101–200	Quadratic	0.5	2	FLSA	-0.333314	0.131529	-0.0203952	0.000604453	-0.0753918	0.00787485	-0.89	1.83	0.75934	0.889532
101–200	Quadratic	0.5	2	GAM	-0.153657	0.10592	-0.011351	0.000715906	-0.0414284	0.00672495	-1.76	3.74	0.666013	0.785615
101–200	Quadratic	0.5	2	LOWESS	-0.123375	0.065981	-0.0128357	0.000400295	-0.0406968	0.00406274	-1.69	3.23	0.679545	0.816402
101–200	Quadratic	0.5	2	MA	1.7205	3.14352	0.0396487	0.00178751	0.011397	0.00030557	-2	4	0.492036	0.725687
101–200	Quadratic	0.5	2	PELT	-0.468064	0.251274	-0.0277459	0.000779959	-0.126597	0.0160619	-2.95	8.77	0.419144	0.502691
101–200	Quadratic	0.5	2	PR	-0.226168	0.139927	-0.019258	0.00057529	-0.0630853	0.00594862	-2.99	8.95	0.454807	0.498524
101–200	Quadratic	1	0.33	ARIMA	0.139987	2.00106	-0.0079264	0.0239918	-0.0910876	0.045231	-2.52	6.6	0.528686	0.574686
101–200	Quadratic	1	0.33	FLSA	-0.615461	0.46943	-0.0764272	0.00790172	-0.146197	0.0288113	-1.04	2.28	0.640833	0.840439
101–200	Quadratic	1	0.33	GAM	-0.26689	0.385482	-0.0450394	0.00975991	-0.0820466	0.0230615	-1.77	3.47	0.617301	0.781458
101–200	Quadratic	1	0.33	LOWESS	-0.282303	0.264674	-0.0588474	0.00651887	-0.0947431	0.0166769	-1.72	3.24	0.610533	0.801507
101–200	Quadratic	1	0.33	MA	2.5603	6.99526	0.077283	0.00765165	-0.0184757	0.00102471	-2	4	0.403348	0.660706
101–200	Quadratic	1	0.33	PELT	-0.947211	1.15419	-0.109941	0.0130093	-0.253521	0.0643936	-2.95	8.83	0.312586	0.46477
101–200	Quadratic	1	0.33	PR	-0.546549	0.55388	-0.0882546	0.00947174	-0.148556	0.0274336	-2.99	8.95	0.373264	0.48199
101–200	Quadratic	1	0.66	ARIMA	0.0310269	1.51283	-0.0341384	0.0128464	-0.110302	0.0389128	-2.5	6.5	0.519046	0.593131
101–200	Quadratic	1	0.66	FLSA	-0.653748	0.507812	-0.0791741	0.00795868	-0.151032	0.0300402	-1.08	2.48	0.627595	0.828089
101–200	Quadratic	1	0.66	GAM	-0.264478	0.301413	-0.0466237	0.00762653	-0.0774859	0.0199455	-1.75	3.41	0.621894	0.788985
101–200	Quadratic	1	0.66	LOWESS	-0.256878	0.218314	-0.0548029	0.00607219	-0.085888	0.0147128	-1.63	2.95	0.632633	0.81967
101–200	Quadratic	1	0.66	MA	1.83392	3.64135	0.00551562	0.000676821	-0.0633178	0.00443763	-2	4	0.47274	0.715118
101–200	Quadratic	1	0.66	PELT	-1.0034	1.00686	-0.113083	0.0127878	-0.254992	0.0650219	-3	9	0.301829	0.457411
101–200	Quadratic	1	0.66	PR	-0.537375	0.469997	-0.088913	0.00885226	-0.144369	0.0255078	-2.99	8.95	0.37482	0.4839
101–200	Quadratic	1	1	ARIMA	-0.0206602	1.4328	-0.0407009	0.0119501	-0.118459	0.0399964	-2.52	6.6	0.510253	0.588681
101–200	Quadratic	1	1	FLSA	-0.672281	0.514398	-0.0830058	0.00796544	-0.153567	0.0296574	-1.03	2.35	0.629314	0.835212
101–200	Quadratic	1	1	GAM	-0.2527	0.247087	-0.0472728	0.00675759	-0.0725509	0.0171731	-1.79	3.53	0.618848	0.785593
101–200	Quadratic	1	1	LOWESS	-0.252792	0.181134	-0.0561967	0.00553186	-0.0835615	0.013044	-1.67	3.03	0.62737	0.817323
101–200	Quadratic	1	1	MA	1.51367	2.53173	-0.0189185	0.000767502	-0.080686	0.00682297	-2	4	0.487509	0.731601
101–200	Quadratic	1	1	PELT	-1.00251	1.00513	-0.113081	0.0127875	-0.254979	0.0650154	-2.99	8.95	0.303036	0.459995
101–200	Quadratic	1	1	PR	-0.518709	0.415391	-0.08846	0.00854937	-0.138815	0.0232733	-2.99	8.95	0.377887	0.485537
101–200	Quadratic	1	2	ARIMA	0.157896	1.27518	-0.0289416	0.00804953	-0.084853	0.0313901	-2.42	6.1	0.534371	0.622944
101–200	Quadratic	1	2	FLSA	-0.706608	0.550911	-0.0882251	0.00843953	-0.163834	0.0319017	-1.18	2.78	0.598075	0.80976
101–200	Quadratic	1	2	GAM	-0.225666	0.169047	-0.0468982	0.00556439	-0.0645518	0.0131304	-1.64	3.26	0.648334	0.804874
101–200	Quadratic	1	2	LOWESS	-0.244015	0.138289	-0.056746	0.00494894	-0.0788895	0.0110829	-1.63	3.03	0.63621	0.819668
101–200	Quadratic	1	2	MA	1.18078	1.60845	-0.0432559	0.00212937	-0.100528	0.0103261	-2	4	0.497098	0.743888
101–200	Quadratic	1	2	PELT	-0.976284	0.980855	-0.112614	0.0126946	-0.254553	0.0648067	-2.97	8.85	0.307191	0.465497
101–200	Quadratic	1	2	PR	-0.472701	0.356158	-0.0840802	0.00850304	-0.126676	0.0205211	-2.97	8.87	0.389349	0.491697
101–200	Quadratic	2	0.33	ARIMA	0.921194	4.79366	0.00915338	0.132063	-0.0514042	0.091303	-2.24	5.24	0.523367	0.545933
101–200	Quadratic	2	0.33	FLSA	-1.41983	2.20602	-0.356457	0.136937	-0.331494	0.127446	-1.21	2.81	0.349425	0.673773
101–200	Quadratic	2	0.33	GAM	-0.286394	0.591907	-0.160087	0.0725817	-0.115091	0.0418832	-1.81	3.67	0.537662	0.734678
101–200	Quadratic	2	0.33	LOWESS	-0.38379	0.525284	-0.216482	0.0738003	-0.15825	0.0416656	-1.88	3.66	0.475476	0.736052
101–200	Quadratic	2	0.33	MA	1.6357	3.09603	-0.245573	0.0625469	-0.23778	0.0576024	-2	4	0.327742	0.670253
101–200	Quadratic	2	0.33	PELT	-1.89089	3.95492	-0.435997	0.196422	-0.497273	0.251323	-2.91	8.65	0.110412	0.318185
101–200	Quadratic	2	0.33	PR	-0.27637	1.41228	-0.165686	0.114783	-0.131503	0.0662669	-2.52	6.74	0.425611	0.536707
101–200	Quadratic	2	0.66	ARIMA	1.14482	3.63205	0.0590632	0.0878905	0.02259	0.0567157	-2.11	4.61	0.512165	0.625391
101–200	Quadratic	2	0.66	FLSA	-1.37933	2.09521	-0.348046	0.131929	-0.321061	0.120228	-1.12	2.5	0.368687	0.696697
101–200	Quadratic	2	0.66	GAM	-0.175099	0.290663	-0.126287	0.0453308	-0.0707495	0.0213995	-1.61	3.33	0.613705	0.780409
101–200	Quadratic	2	0.66	LOWESS	-0.305005	0.329461	-0.201818	0.0597191	-0.137234	0.0313172	-1.95	3.85	0.486589	0.740418
101–200	Quadratic	2	0.66	MA	0.877688	1.07653	-0.318316	0.102301	-0.278219	0.0780644	-2	4	0.338408	0.677072
101–200	Quadratic	2	0.66	PELT	-1.5871	3.00039	-0.329972	0.150464	-0.393062	0.190996	-2.68	7.5	0.19139	0.412008
101–200	Quadratic	2	0.66	PR	-0.0144367	1.00876	-0.118752	0.0787865	-0.0847757	0.0430823	-2.21	5.43	0.531417	0.633138
101–200	Quadratic	2	1	ARIMA	1.5534	3.11305	0.13941	0.0677487	0.106839	0.0279252	-1.9	3.86	0.435949	0.694962
101–200	Quadratic	2	1	FLSA	-1.43113	2.22752	-0.361508	0.138823	-0.338026	0.130183	-1.17	2.57	0.348041	0.682206
101–200	Quadratic	2	1	GAM	-0.130897	0.187036	-0.102966	0.0319205	-0.0450029	0.013513	-1.26	3.08	0.697199	0.805619
101–200	Quadratic	2	1	LOWESS	-0.246041	0.230933	-0.182665	0.0479758	-0.116221	0.0233764	-1.81	3.61	0.529313	0.764031
101–200	Quadratic	2	1	MA	0.580583	0.589629	-0.342697	0.118066	-0.294476	0.0872349	-2	4	0.342499	0.67405
101–200	Quadratic	2	1	PELT	-1.31135	2.35403	-0.261631	0.114652	-0.320593	0.145747	-2.46	6.44	0.26858	0.498411
101–200	Quadratic	2	1	PR	0.355901	0.658671	-0.0538915	0.0429729	-0.0255934	0.0196101	-1.76	3.56	0.6327	0.763832
101–200	Quadratic	2	2	ARIMA	1.62021	3.01978	0.17658	0.0520192	0.139187	0.0255741	-1.88	3.8	0.405098	0.705782
101–200	Quadratic	2	2	FLSA	-1.44708	2.25481	-0.365389	0.14043	-0.341208	0.130898	-1.12	2.26	0.348965	0.695251
101–200	Quadratic	2	2	GAM	-0.0803332	0.0884671	-0.0712295	0.0169877	-0.0141229	0.00687839	-0.98	2.46	0.780752	0.851054
101–200	Quadratic	2	2	LOWESS	-0.188525	0.104248	-0.132227	0.0238651	-0.0611886	0.00803485	-1.45	3.17	0.638678	0.80859
101–200	Quadratic	2	2	MA	0.258729	0.279225	-0.366497	0.134693	-0.312039	0.0977294	-2	4	0.347171	0.667187
101–200	Quadratic	2	2	PELT	-0.886818	1.32039	-0.159941	0.0626683	-0.209726	0.0776014	-2.09	4.77	0.414864	0.646621
101–200	Quadratic	2	2	PR	0.492705	0.460814	-0.0261919	0.0198013	0.0018376	0.00869871	-1.46	2.48	0.692525	0.840996
101–200	Recurrent	0.25	0.33	ARIMA	0.341835	1.2582	0.0360385	0.0152381	-0.0154595	0.0246776	-2.67	7.35	0.504921	0.558631
101–200	Recurrent	0.25	0.33	FLSA	0.0486247	0.0675653	0.00757248	0.000812174	-0.0264645	0.00551123	-1.14	2.68	0.785857	0.845578
101–200	Recurrent	0.25	0.33	GAM	0.272861	0.156632	0.0140955	0.000779444	0.0219763	0.00517922	-1.98	3.94	0.628084	0.774786
101–200	Recurrent	0.25	0.33	LOWESS	0.319764	0.169364	0.0172606	0.000836041	0.0273274	0.00475325	-1.71	3.27	0.662093	0.811784
101–200	Recurrent	0.25	0.33	MA	3.12991	10.0043	0.147954	0.0228769	0.115506	0.0137482	-2	4	0.294516	0.599295
101–200	Recurrent	0.25	0.33	PELT	-0.212002	0.0922217	-0.0144774	0.000233772	-0.104041	0.0108434	-2.96	8.82	0.448747	0.504149
101–200	Recurrent	0.25	0.33	PR	0.196248	0.108242	0.00752864	0.000489151	0.00757065	0.00445865	-3	9	0.48028	0.496774
101–200	Recurrent	0.25	0.66	ARIMA	0.35998	1.10219	0.029027	0.00948872	-0.0153364	0.020019	-2.6	7	0.518333	0.583388
101–200	Recurrent	0.25	0.66	FLSA	0.0361306	0.0538859	0.00589504	0.000606803	-0.0314983	0.00487187	-1.11	2.55	0.790172	0.853544
101–200	Recurrent	0.25	0.66	GAM	0.323461	0.166628	0.0183935	0.000899002	0.0349915	0.005132	-1.94	3.84	0.621668	0.780127
101–200	Recurrent	0.25	0.66	LOWESS	0.328768	0.155696	0.0170627	0.00068762	0.0316516	0.00368288	-1.74	3.3	0.654573	0.811169
101–200	Recurrent	0.25	0.66	MA	2.37507	5.7969	0.0816927	0.00710661	0.0722683	0.00551147	-2	4	0.394	0.677359
101–200	Recurrent	0.25	0.66	PELT	-0.18879	0.197446	-0.0130471	0.000425232	-0.103352	0.0107865	-2.96	8.82	0.451243	0.502986
101–200	Recurrent	0.25	0.66	PR	0.260045	0.121358	0.0113644	0.000495398	0.0236389	0.00395136	-3	9	0.468548	0.496854
101–200	Recurrent	0.25	1	ARIMA	0.515924	1.297	0.0278542	0.00605707	-8.40729e-05	0.0148203	-2.46	6.3	0.535049	0.62205
101–200	Recurrent	0.25	1	FLSA	0.0453558	0.0569158	0.00701636	0.000609364	-0.0292744	0.00455636	-1.12	2.6	0.788192	0.850959
101–200	Recurrent	0.25	1	GAM	0.351251	0.167922	0.0202421	0.00089782	0.0422495	0.00476641	-1.94	3.84	0.614916	0.780354
101–200	Recurrent	0.25	1	LOWESS	0.346668	0.155369	0.0183009	0.000670499	0.036673	0.00338942	-1.74	3.24	0.649838	0.8147
101–200	Recurrent	0.25	1	MA	2.05679	4.37535	0.061476	0.00406435	0.0567473	0.0034802	-2	4	0.434682	0.702772
101–200	Recurrent	0.25	1	PELT	-0.162869	0.316532	-0.0103352	0.00121829	-0.101064	0.0108224	-2.95	8.79	0.456638	0.503079
101–200	Recurrent	0.25	1	PR	0.300091	0.130386	0.0138399	0.00051272	0.0337241	0.0036836	-3	9	0.461192	0.496869
101–200	Recurrent	0.25	2	ARIMA	0.990246	2.30955	0.0569944	0.012353	0.0550379	0.0199792	-2.28	5.4	0.488464	0.650158
101–200	Recurrent	0.25	2	FLSA	0.072836	0.0543019	0.00944068	0.000626396	-0.023246	0.00377228	-1.05	2.37	0.798654	0.864303
101–200	Recurrent	0.25	2	GAM	0.388638	0.178673	0.0235152	0.00093856	0.0529759	0.00483902	-1.92	3.84	0.60806	0.780114
101–200	Recurrent	0.25	2	LOWESS	0.377808	0.165807	0.0210288	0.000688521	0.0451163	0.00330779	-1.57	2.77	0.667495	0.840518
101–200	Recurrent	0.25	2	MA	1.66604	2.87706	0.0396798	0.00172644	0.0390608	0.00177052	-2	4	0.484384	0.729068
101–200	Recurrent	0.25	2	PELT	-0.219746	0.0748475	-0.0146916	0.000227678	-0.103046	0.0107721	-2.95	8.77	0.449968	0.507116
101–200	Recurrent	0.25	2	PR	0.350885	0.149608	0.017642	0.000566426	0.0465162	0.00383689	-3	9	0.451571	0.496584
101–200	Recurrent	0.5	0.33	ARIMA	0.242973	1.43965	0.00282402	0.0160375	-0.100047	0.0375082	-2.62	7.1	0.504817	0.562652
101–200	Recurrent	0.5	0.33	FLSA	-0.133834	0.102406	-0.0276823	0.00217659	-0.118076	0.0191525	-1.17	2.55	0.711193	0.841555
101–200	Recurrent	0.5	0.33	GAM	0.218348	0.147429	-0.00965105	0.00123414	-0.0366125	0.00702205	-1.99	3.97	0.626958	0.771892
101–200	Recurrent	0.5	0.33	LOWESS	0.232537	0.139799	-0.00997418	0.00114264	-0.03976	0.00626517	-1.75	3.29	0.661763	0.810019
101–200	Recurrent	0.5	0.33	MA	2.84538	8.33583	0.0980119	0.0106884	0.0166729	0.000673775	-2	4	0.373442	0.638297
101–200	Recurrent	0.5	0.33	PELT	-0.463491	0.258909	-0.060505	0.00368165	-0.208834	0.0436332	-2.96	8.82	0.375667	0.486807
101–200	Recurrent	0.5	0.33	PR	0.153454	0.114633	-0.0172385	0.00132914	-0.0450072	0.00776602	-3	9	0.465166	0.495003
101–200	Recurrent	0.5	0.66	ARIMA	0.777485	2.64177	0.0271171	0.0142829	-0.047764	0.0272138	-2.41	6.05	0.503708	0.607104
101–200	Recurrent	0.5	0.66	FLSA	-0.119379	0.0913755	-0.0245316	0.00200479	-0.11062	0.0174194	-1.14	2.4	0.722904	0.851288
101–200	Recurrent	0.5	0.66	GAM	0.290577	0.140402	-0.00266952	0.00088285	-0.0192329	0.00374834	-1.9	3.84	0.646446	0.781507
101–200	Recurrent	0.5	0.66	LOWESS	0.306171	0.154663	-0.00374905	0.000864979	-0.0264029	0.0034865	-1.77	3.31	0.661482	0.810715
101–200	Recurrent	0.5	0.66	MA	2.05297	4.41016	0.0327087	0.00156348	-0.0250744	0.00102245	-2	4	0.460188	0.704601
101–200	Recurrent	0.5	0.66	PELT	-0.465837	0.31624	-0.059711	0.00380444	-0.208257	0.0435112	-2.97	8.87	0.374735	0.483555
101–200	Recurrent	0.5	0.66	PR	0.241875	0.112221	-0.00991033	0.000886768	-0.022739	0.00390116	-3	9	0.470818	0.496844
101–200	Recurrent	0.5	1	ARIMA	1.05141	3.22248	0.047403	0.0152668	-0.0145707	0.0250521	-2.32	5.6	0.49898	0.622771
101–200	Recurrent	0.5	1	FLSA	-0.108121	0.0892316	-0.0242801	0.00195049	-0.110894	0.0173338	-1.15	2.43	0.722558	0.84977
101–200	Recurrent	0.5	1	GAM	0.330508	0.154847	0.00143686	0.000756051	-0.0118813	0.00261351	-1.89	3.77	0.648514	0.78595
101–200	Recurrent	0.5	1	LOWESS	0.39911	0.216324	0.00674878	0.000829378	-0.00962341	0.00211778	-1.62	3.44	0.682872	0.803461
101–200	Recurrent	0.5	1	MA	1.73297	3.15297	0.01253	0.000505457	-0.0392715	0.00197064	-2	4	0.489766	0.724805
101–200	Recurrent	0.5	1	PELT	-0.410218	0.481849	-0.0552005	0.00472783	-0.205049	0.0429699	-2.95	8.79	0.383966	0.485978
101–200	Recurrent	0.5	1	PR	0.281921	0.119792	-0.00585315	0.000695901	-0.0126538	0.00270037	-3	9	0.47378	0.497346
101–200	Recurrent	0.5	2	ARIMA	1.7215	4.3376	0.114672	0.0257435	0.0865657	0.0255575	-2.12	4.6	0.414591	0.652675
101–200	Recurrent	0.5	2	FLSA	-0.109552	0.0979439	-0.022506	0.0020182	-0.111834	0.0179333	-1.25	2.87	0.70765	0.825127
101–200	Recurrent	0.5	2	GAM	0.418012	0.219001	0.0149789	0.00121572	0.0108021	0.00225269	-1.81	3.83	0.646495	0.781671
101–200	Recurrent	0.5	2	LOWESS	0.540301	0.338749	0.0231287	0.00110444	0.0112833	0.00126964	-1.42	3.44	0.690693	0.801887
101–200	Recurrent	0.5	2	MA	1.28305	1.73188	-0.00783024	0.000221187	-0.0540778	0.00330802	-2	4	0.52457	0.747197
101–200	Recurrent	0.5	2	PELT	-0.459282	0.259571	-0.058477	0.0038703	-0.205441	0.0428859	-2.94	8.74	0.380596	0.491325
101–200	Recurrent	0.5	2	PR	0.332715	0.137167	-4.48616e-05	0.000498687	0.000138263	0.00167021	-3	9	0.477803	0.497674
101–200	Recurrent	1	0.33	ARIMA	0.919857	4.85941	-0.0285565	0.067674	-0.160055	0.0877041	-2.42	6.1	0.445566	0.525194
101–200	Recurrent	1	0.33	FLSA	-0.460906	0.394315	-0.172535	0.0355824	-0.280952	0.0899691	-1.14	2.7	0.53178	0.766083
101–200	Recurrent	1	0.33	GAM	0.245397	0.208286	-0.111896	0.016452	-0.137926	0.0244265	-1.99	3.97	0.5286	0.754289
101–200	Recurrent	1	0.33	LOWESS	0.379252	0.300495	-0.0970727	0.0133211	-0.129542	0.0213945	-1.69	3.71	0.571418	0.769911
101–200	Recurrent	1	0.33	MA	2.16685	4.96453	-0.0942325	0.01021	-0.175157	0.0315534	-2	4	0.362964	0.672545
101–200	Recurrent	1	0.33	PELT	-0.964099	0.973373	-0.244404	0.059755	-0.418335	0.175041	-2.96	8.82	0.216124	0.406049
101–200	Recurrent	1	0.33	PR	0.117114	0.104792	-0.13125	0.0203046	-0.137763	0.0246975	-3	9	0.379727	0.481699
101–200	Recurrent	1	0.66	ARIMA	1.82782	5.10692	0.109483	0.0517533	0.0224362	0.0314282	-2.07	4.37	0.440468	0.640713
101–200	Recurrent	1	0.66	FLSA	-0.448405	0.389839	-0.169311	0.0345509	-0.280032	0.0905763	-1.22	2.94	0.5248	0.753852
101–200	Recurrent	1	0.66	GAM	0.440292	0.335295	-0.0552314	0.0119261	-0.0770328	0.0149246	-1.74	3.76	0.603378	0.771482
101–200	Recurrent	1	0.66	LOWESS	0.634511	0.48673	-0.03425	0.00477599	-0.0606722	0.00787969	-1.41	3.27	0.651757	0.802846
101–200	Recurrent	1	0.66	MA	1.37588	2.04363	-0.147947	0.022371	-0.204764	0.0427778	-2	4	0.394836	0.708842
101–200	Recurrent	1	0.66	PELT	-0.879203	1.04478	-0.224841	0.057191	-0.40023	0.165956	-2.91	8.59	0.236604	0.420535
101–200	Recurrent	1	0.66	PR	0.205535	0.0959482	-0.116937	0.0158061	-0.115495	0.0167124	-3	9	0.388379	0.486654
101–200	Recurrent	1	1	ARIMA	2.15293	5.47363	0.168057	0.0469092	0.0892687	0.018215	-1.95	3.95	0.379167	0.665147
101–200	Recurrent	1	1	FLSA	-0.438767	0.370808	-0.168423	0.0340516	-0.277065	0.0879534	-1.19	2.85	0.531261	0.760786
101–200	Recurrent	1	1	GAM	0.600249	0.48757	-0.00939187	0.00961933	-0.0311895	0.010835	-1.55	4.03	0.661796	0.757789
101–200	Recurrent	1	1	LOWESS	0.673979	0.517356	-0.0128216	0.00298471	-0.0358402	0.00515665	-1.33	3.53	0.682994	0.790603
101–200	Recurrent	1	1	MA	1.07552	1.26225	-0.162288	0.026722	-0.213309	0.0463308	-2	4	0.40907	0.717779
101–200	Recurrent	1	1	PELT	-0.424922	0.947776	-0.130037	0.0425001	-0.311004	0.119016	-2.54	6.92	0.36756	0.527645
101–200	Recurrent	1	1	PR	0.338082	0.349464	-0.0896808	0.0193358	-0.0926268	0.0151352	-2.87	8.57	0.420397	0.506961
101–200	Recurrent	1	2	ARIMA	2.26849	5.47799	0.225096	0.0587187	0.137841	0.0226551	-1.97	3.93	0.329583	0.659742
101–200	Recurrent	1	2	FLSA	-0.41138	0.315546	-0.163884	0.0321002	-0.26813	0.0819707	-1.05	2.29	0.557864	0.79534
101–200	Recurrent	1	2	GAM	0.755907	0.62435	0.0514171	0.00737424	0.0357993	0.00610734	-0.9	3.3	0.718519	0.799266
101–200	Recurrent	1	2	LOWESS	0.665411	0.477782	0.0104251	0.00247645	-0.00466854	0.0036376	-0.83	3.83	0.777366	0.776043
101–200	Recurrent	1	2	MA	0.735667	0.634033	-0.174272	0.0307125	-0.220208	0.0492246	-2	4	0.427376	0.724759
101–200	Recurrent	1	2	PELT	-0.0239319	0.556436	-0.03238	0.0233328	-0.205658	0.064271	-2.19	5.25	0.52744	0.653501
101–200	Recurrent	1	2	PR	0.979613	1.48336	0.0374685	0.0232504	0.00168965	0.0117363	-1.73	4.61	0.600011	0.705842
101–200	Recurrent	2	0.33	ARIMA	2.79263	9.00549	0.234514	0.166104	0.0733311	0.0246697	-1.77	3.63	0.33206	0.587261
101–200	Recurrent	2	0.33	FLSA	-1.14461	1.6784	-0.807578	0.67822	-0.612048	0.40006	-1.15	2.63	0.152702	0.390341
101–200	Recurrent	2	0.33	GAM	0.994781	1.13221	-0.135141	0.0497758	-0.0545366	0.0127512	-0.83	2.29	0.652821	0.826619
101–200	Recurrent	2	0.33	LOWESS	0.89742	0.953119	-0.264898	0.0893806	-0.137178	0.0278612	-0.96	2.58	0.544374	0.790805
101–200	Recurrent	2	0.33	MA	0.973988	1.20078	-0.793648	0.630969	-0.52021	0.271961	-1.99	3.97	0.115976	0.423094
101–200	Recurrent	2	0.33	PELT	-0.81783	2.41811	-0.564647	0.503338	-0.586912	0.410312	-2.42	6.3	0.137342	0.287934
101–200	Recurrent	2	0.33	PR	1.15163	2.943	-0.232102	0.252725	-0.152483	0.0648871	-1.9	5.18	0.410989	0.555004
101–200	Recurrent	2	0.66	ARIMA	2.76867	8.12094	0.31405	0.140205	0.126256	0.0223192	-1.12	3.08	0.347805	0.634234
101–200	Recurrent	2	0.66	FLSA	-1.04361	1.43293	-0.781326	0.636306	-0.586719	0.367737	-1.05	1.95	0.17807	0.444838
101–200	Recurrent	2	0.66	GAM	1.09299	1.28275	-0.00819731	0.0267085	0.0165792	0.00843782	-0.31	1.67	0.795781	0.86769
101–200	Recurrent	2	0.66	LOWESS	0.804586	0.708026	-0.186244	0.0476153	-0.0718041	0.0103	-0.31	2.09	0.712459	0.847603
101–200	Recurrent	2	0.66	MA	0.34751	0.27226	-0.828716	0.687652	-0.53556	0.287947	-1.97	3.93	0.123019	0.414119
101–200	Recurrent	2	0.66	PELT	0.0691095	0.73988	-0.252485	0.140958	-0.356365	0.161212	-1.81	3.77	0.415516	0.628837
101–200	Recurrent	2	0.66	PR	1.88851	4.0865	0.0590852	0.0733379	0.00430942	0.0149987	-0.7	1.3	0.634323	0.81442
101–200	Recurrent	2	1	ARIMA	2.6986	7.63156	0.326239	0.137247	0.137748	0.0239331	-0.62	2.48	0.390488	0.669282
101–200	Recurrent	2	1	FLSA	-1.06274	1.47115	-0.787221	0.647279	-0.590687	0.374141	-1.04	2.14	0.17528	0.43137
101–200	Recurrent	2	1	GAM	1.11616	1.31252	0.0396901	0.024862	0.0420784	0.0087081	-0.18	1.38	0.779672	0.883049
101–200	Recurrent	2	1	LOWESS	0.778607	0.647818	-0.161556	0.0384208	-0.054493	0.00767354	-0.04	2.26	0.775914	0.84438
101–200	Recurrent	2	1	MA	0.0852879	0.125151	-0.839264	0.705179	-0.540078	0.292743	-1.96	3.9	0.127119	0.410486
101–200	Recurrent	2	1	PELT	0.352071	0.469482	-0.0175793	0.100497	-0.175475	0.0901358	-1.09	2.33	0.672763	0.763945
101–200	Recurrent	2	1	PR	1.97741	4.16553	0.0994739	0.0470214	0.0264084	0.00925796	-0.44	0.68	0.626291	0.856384
101–200	Recurrent	2	2	ARIMA	2.65519	7.26736	0.34901	0.145161	0.152048	0.0270659	-0.3	1.5	0.409595	0.716034
101–200	Recurrent	2	2	FLSA	-1.12442	1.67085	-0.794956	0.662058	-0.605703	0.397669	-1.22	2.74	0.153231	0.391248
101–200	Recurrent	2	2	GAM	1.13497	1.32862	0.099261	0.0259013	0.0730813	0.00939454	0.08	0.44	0.743858	0.932207
101–200	Recurrent	2	2	LOWESS	0.762851	0.618725	-0.116651	0.0274613	-0.0269907	0.00530135	0.24	2.1	0.78761	0.858944
101–200	Recurrent	2	2	MA	0.267421	0.801042	-0.596598	0.588115	-0.39167	0.237884	-1.49	3.05	0.291342	0.495442
101–200	Recurrent	2	2	PELT	0.42037	0.255494	0.196081	0.110354	0.00435342	0.0443386	-0.43	1.05	0.770978	0.865818
101–200	Recurrent	2	2	PR	1.92318	3.88087	0.115147	0.0368626	0.0362063	0.0083654	-0.28	0.4	0.63959	0.87999
201–500	No change	0	0.33	ARIMA	0.612094	1.50918	0.02696	0.00299213	0.0661799	0.0152613	0.3	0.3	0.816175	0.938243
201–500	No change	0	0.33	FLSA	0.133229	0.0424593	0.00805951	0.000250251	0.0464314	0.0058605	1.16667	2.46667	0.761204	0.857734
201–500	No change	0	0.33	GAM	0.526304	0.333544	0.0283526	0.00129616	0.129581	0.0199494	1.28333	1.98333	0.647517	0.867801
201–500	No change	0	0.33	LOWESS	0.527522	0.329684	0.0281481	0.00118131	0.130259	0.0192485	1.46667	2.56667	0.621462	0.836806
201–500	No change	0	0.33	MA	3.41774	12.0932	0.108052	0.0123277	0.191642	0.0378441	1	1	0.319473	0.6708
201–500	No change	0	0.33	PELT	0.012115	0.00880643	9.80573e-05	5.76914e-07	0.000136124	1.11178e-06	0.0166667	0.0166667	0.995467	0.998888
201–500	No change	0	0.33	PR	0.514607	0.541574	0.0255521	0.00204726	0.111754	0.0174361	0.05	0.05	0.835156	0.970176
201–500	No change	0	0.66	ARIMA	0.625754	1.1612	0.0241629	0.00211155	0.0709099	0.0141343	0.383333	0.383333	0.800721	0.942198
201–500	No change	0	0.66	FLSA	0.130093	0.0416265	0.00596105	0.000128422	0.038686	0.00381518	1.26667	3.1	0.751004	0.824278
201–500	No change	0	0.66	GAM	0.394236	0.187018	0.0158086	0.00039382	0.0961716	0.0109538	1.23333	1.83333	0.692304	0.885977
201–500	No change	0	0.66	LOWESS	0.394081	0.183485	0.0156216	0.000358598	0.0960168	0.0105808	1.45	2.58333	0.660671	0.845221
201–500	No change	0	0.66	MA	2.8395	8.34759	0.0682823	0.00495056	0.14861	0.0229265	1	1	0.413403	0.758854
201–500	No change	0	0.66	PELT	0	0	0	0	0	0	0	0	1	1
201–500	No change	0	0.66	PR	0.39461	0.324193	0.0147154	0.000651936	0.0847074	0.00985594	0.05	0.05	0.874363	0.981715
201–500	No change	0	1	ARIMA	0.63695	1.5088	0.0442755	0.021344	0.0826076	0.0271724	0.366667	0.366667	0.784678	0.918929
201–500	No change	0	1	FLSA	0.113828	0.0334952	0.00379095	4.94679e-05	0.0283067	0.00223254	1.31667	3.38333	0.751452	0.80988
201–500	No change	0	1	GAM	0.336535	0.137037	0.0114463	0.000205522	0.0811903	0.00785515	1.3	2	0.698649	0.88022
201–500	No change	0	1	LOWESS	0.337479	0.134779	0.011477	0.000194845	0.0813708	0.00773578	1.28333	1.88333	0.700936	0.886777
201–500	No change	0	1	MA	2.58386	6.91111	0.0545035	0.00315303	0.130756	0.0177917	1	1	0.454585	0.791977
201–500	No change	0	1	PELT	0	0	0	0	0	0	0	0	1	1
201–500	No change	0	1	PR	0.320315	0.213734	0.0100122	0.000295771	0.0703939	0.00675001	0.0333333	0.0333333	0.8987	0.98774
201–500	No change	0	2	ARIMA	0.526207	1.32139	0.0377407	0.0179497	0.0677789	0.0236399	0.3	0.3	0.820526	0.930317
201–500	No change	0	2	FLSA	0.081136	0.0151572	0.00170097	1.05942e-05	0.0193265	0.000899604	1.25	2.65	0.77164	0.851839
201–500	No change	0	2	GAM	0.262268	0.0856993	0.0070987	8.07991e-05	0.0627939	0.00482854	1.13333	1.4	0.744023	0.916682
201–500	No change	0	2	LOWESS	0.263693	0.0828992	0.00714251	7.7355e-05	0.0630809	0.00481102	1.23333	1.73333	0.728331	0.898342
201–500	No change	0	2	MA	2.37339	5.80256	0.0420825	0.00186672	0.110777	0.0127912	1	1	0.492338	0.818387
201–500	No change	0	2	PELT	0	0	0	0	0	0	0	0	1	1
201–500	No change	0	2	PR	0.236963	0.112482	0.0058357	9.26138e-05	0.0542488	0.00402233	0.0166667	0.0166667	0.925432	0.993205
201–500	Jump	0.25	0.33	ARIMA	0.194997	1.01116	0.00692481	0.00221211	-0.0174461	0.00822934	-0.75	0.75	0.838065	0.930454
201–500	Jump	0.25	0.33	FLSA	-0.0927997	0.032336	-0.00395012	0.000112949	-0.0148656	0.0022676	0.45	1.45	0.901944	0.916978
201–500	Jump	0.25	0.33	GAM	0.28058	0.127655	0.0158784	0.000591085	0.0692974	0.0077635	0.116667	0.116667	0.888982	0.983986
201–500	Jump	0.25	0.33	LOWESS	0.310242	0.138133	0.0176317	0.000627229	0.0720753	0.00739681	0.166667	0.233333	0.874824	0.97765
201–500	Jump	0.25	0.33	MA	3.28256	10.9926	0.0963712	0.00985184	0.123592	0.0155611	0	0	0.452485	0.753271
201–500	Jump	0.25	0.33	PELT	-0.25	0.0625	-0.0116706	0.000136205	-0.0618365	0.00382383	-1	1	0.764058	0.940034
201–500	Jump	0.25	0.33	PR	0.221644	0.112095	0.0123264	0.00055268	0.0564241	0.00713934	-1	1	0.769925	0.936205
201–500	Jump	0.25	0.66	ARIMA	0.456472	1.29502	0.0160317	0.00217947	0.0130969	0.0103842	-0.6	0.6	0.828928	0.931002
201–500	Jump	0.25	0.66	FLSA	-0.0725688	0.032422	-0.00267083	0.000142296	-0.00882273	0.00230142	0.716667	1.85	0.865232	0.894777
201–500	Jump	0.25	0.66	GAM	0.244112	0.0898301	0.0113792	0.000315868	0.0602747	0.00547424	0.1	0.1	0.904636	0.987753
201–500	Jump	0.25	0.66	LOWESS	0.257517	0.0963994	0.0127412	0.000345395	0.0609731	0.00536129	0.266667	0.4	0.876066	0.971148
201–500	Jump	0.25	0.66	MA	2.58813	6.86231	0.0596567	0.00373889	0.0937242	0.00895996	0	0	0.571475	0.847113
201–500	Jump	0.25	0.66	PELT	-0.25	0.0625	-0.0116706	0.000136205	-0.0618365	0.00382383	-1	1	0.764058	0.940034
201–500	Jump	0.25	0.66	PR	0.196357	0.0805437	0.00861326	0.00030292	0.0500874	0.00514664	-1	1	0.77826	0.938541
201–500	Jump	0.25	1	ARIMA	0.569286	1.34988	0.0270506	0.00462297	0.0357079	0.0147821	-0.516667	0.516667	0.808631	0.929881
201–500	Jump	0.25	1	FLSA	-0.0817851	0.0269145	-0.00426491	0.000101236	-0.0123341	0.00172239	0.816667	1.91667	0.844811	0.891648
201–500	Jump	0.25	1	GAM	0.229363	0.075893	0.009684	0.000230664	0.0564416	0.00460015	0.133333	0.133333	0.904846	0.986983
201–500	Jump	0.25	1	LOWESS	0.238271	0.0802892	0.0108236	0.000253613	0.0566757	0.00453842	0.266667	0.4	0.882299	0.972205
201–500	Jump	0.25	1	MA	2.28938	5.38767	0.0473495	0.0023491	0.0820404	0.00687943	0	0	0.62206	0.88024
201–500	Jump	0.25	1	PELT	-0.25	0.0625	-0.0116706	0.000136205	-0.0618365	0.00382383	-1	1	0.764058	0.940034
201–500	Jump	0.25	1	PR	0.188228	0.0677116	0.00719388	0.000223496	0.0480507	0.00433741	-1	1	0.781064	0.939482
201–500	Jump	0.25	2	ARIMA	0.580461	1.26874	0.0309388	0.0125202	0.0411167	0.016798	-0.466667	0.466667	0.809458	0.930018
201–500	Jump	0.25	2	FLSA	-0.118058	0.0324983	-0.00629892	9.43006e-05	-0.024518	0.00196241	0.5	1.46667	0.883371	0.9163
201–500	Jump	0.25	2	GAM	0.214526	0.0610069	0.00788013	0.00015182	0.0518316	0.00363311	0.15	0.216667	0.908199	0.983541
201–500	Jump	0.25	2	LOWESS	0.216918	0.0623157	0.00867009	0.000163738	0.0516107	0.00358247	0.333333	0.5	0.879041	0.967881
201–500	Jump	0.25	2	MA	2.04973	4.30418	0.035291	0.00128467	0.068674	0.00480606	0	0	0.666638	0.905082
201–500	Jump	0.25	2	PELT	-0.25	0.0625	-0.0116706	0.000136205	-0.0618365	0.00382383	-1	1	0.764058	0.940034
201–500	Jump	0.25	2	PR	0.179094	0.053644	0.00562878	0.000147474	0.045763	0.00345084	-1	1	0.784204	0.940511
201–500	Jump	0.5	0.33	ARIMA	1.24594	4.01684	0.0721782	0.0237683	0.0802075	0.0341488	-0.333333	0.333333	0.704378	0.862771
201–500	Jump	0.5	0.33	FLSA	-0.266729	0.114061	-0.0302914	0.0013006	-0.0557092	0.00654546	0.616667	1.68333	0.815287	0.898751
201–500	Jump	0.5	0.33	GAM	0.321276	0.161809	0.0148358	0.00109415	0.0757521	0.00891593	0.0833333	0.0833333	0.884946	0.983951
201–500	Jump	0.5	0.33	LOWESS	0.309429	0.151138	0.0149775	0.00107474	0.0727539	0.00833038	0.366667	0.5	0.845531	0.961777
201–500	Jump	0.5	0.33	MA	2.84291	8.3735	0.0847762	0.00755928	0.104278	0.011363	0	0	0.523987	0.812322
201–500	Jump	0.5	0.33	PELT	-0.5	0.25	-0.0466825	0.00217927	-0.123673	0.0152953	-1	1	0.684755	0.926279
201–500	Jump	0.5	0.33	PR	0.239734	0.130147	0.00543583	0.00106295	0.0618123	0.00837886	-1	1	0.768411	0.934668
201–500	Jump	0.5	0.66	ARIMA	1.60366	4.15622	0.117844	0.0610532	0.149844	0.0487303	-0.116667	0.15	0.625206	0.845839
201–500	Jump	0.5	0.66	FLSA	-0.26981	0.116302	-0.0296181	0.00131937	-0.0559408	0.00678407	0.583333	1.61667	0.820274	0.902188
201–500	Jump	0.5	0.66	GAM	0.300732	0.124586	0.01054	0.000618422	0.0677822	0.00636272	0.05	0.05	0.900253	0.988919
201–500	Jump	0.5	0.66	LOWESS	0.271405	0.104586	0.00905522	0.000575259	0.0646046	0.00602176	0.516667	1.15	0.835518	0.928988
201–500	Jump	0.5	0.66	MA	2.15398	4.82994	0.0499505	0.00282172	0.0771111	0.00648647	0	0	0.641951	0.892143
201–500	Jump	0.5	0.66	PELT	-0.474545	0.244097	-0.043598	0.00219666	-0.117823	0.0148731	-0.95	0.983333	0.699346	0.927645
201–500	Jump	0.5	0.66	PR	0.223834	0.0929621	0.000977702	0.00060394	0.0578299	0.00603328	-1	1	0.774757	0.937471
201–500	Jump	0.5	1	ARIMA	1.35896	2.64342	0.0842155	0.0233908	0.136017	0.032538	-0.0666667	0.166667	0.683333	0.900805
201–500	Jump	0.5	1	FLSA	-0.245659	0.0982647	-0.0289958	0.00117261	-0.0521897	0.00581384	0.75	2.01667	0.799868	0.881279
201–500	Jump	0.5	1	GAM	0.290027	0.109701	0.00892514	0.000459938	0.0642117	0.00542085	0.166667	0.2	0.887077	0.981821
201–500	Jump	0.5	1	LOWESS	0.258634	0.0904272	0.00704134	0.000429095	0.061577	0.0052456	0.533333	1.46667	0.837431	0.912464
201–500	Jump	0.5	1	MA	1.93579	3.91065	0.0395129	0.00182802	0.0675178	0.00503137	0	0	0.680643	0.912984
201–500	Jump	0.5	1	PELT	-0.474991	0.243799	-0.0433366	0.00220344	-0.117893	0.0148606	-0.966667	0.966667	0.697006	0.928568
201–500	Jump	0.5	1	PR	0.216632	0.0792402	-0.00077907	0.000455756	0.0560263	0.0051671	-1	1	0.776694	0.9385
201–500	Jump	0.5	2	ARIMA	1.14284	1.92945	0.0691658	0.0142847	0.125774	0.0265672	0.0833333	0.483333	0.721329	0.906949
201–500	Jump	0.5	2	FLSA	-0.218731	0.0856259	-0.0258222	0.00102768	-0.0442343	0.00485178	0.85	1.95	0.793648	0.885983
201–500	Jump	0.5	2	GAM	0.276891	0.0931159	0.00710594	0.000299743	0.0596761	0.00441869	0.233333	0.266667	0.882484	0.979393
201–500	Jump	0.5	2	LOWESS	0.243416	0.0751639	0.00502318	0.000289826	0.057741	0.00435709	0.733333	1.43333	0.811785	0.915352
201–500	Jump	0.5	2	MA	1.64912	2.82438	0.0281078	0.00102454	0.0566498	0.00361507	0	0	0.729973	0.937251
201–500	Jump	0.5	2	PELT	-0.464227	0.239839	-0.0420473	0.00217534	-0.115199	0.0146262	-0.95	0.95	0.702689	0.929757
201–500	Jump	0.5	2	PR	0.224223	0.0706097	-0.00137008	0.000285685	0.0565178	0.00438178	-0.966667	0.966667	0.780437	0.941211
201–500	Jump	1	0.33	ARIMA	2.00609	5.90444	0.182006	0.106493	0.203566	0.0683753	0.0666667	0.266667	0.526087	0.776167
201–500	Jump	1	0.33	FLSA	-0.517724	0.392283	-0.121634	0.0185327	-0.114877	0.0221135	0.75	1.81667	0.687724	0.868538
201–500	Jump	1	0.33	GAM	0.464238	0.300546	0.00240884	0.00377118	0.0875876	0.0102198	0.266667	0.433333	0.837613	0.959914
201–500	Jump	1	0.33	LOWESS	0.397221	0.23339	-0.00519713	0.00391398	0.085644	0.0105279	0.816667	2.41667	0.764615	0.852341
201–500	Jump	1	0.33	MA	2.45078	6.24697	0.0578528	0.00620031	0.0851702	0.0091296	0	0	0.595462	0.859175
201–500	Jump	1	0.33	PELT	-0.380947	0.719347	-0.0616474	0.0251169	-0.114535	0.0365029	-0.483333	0.65	0.770325	0.911009
201–500	Jump	1	0.33	PR	0.432399	0.264884	-0.0144107	0.00349267	0.0962538	0.0127021	-0.8	0.8	0.752224	0.938606
201–500	Jump	1	0.66	ARIMA	1.75365	4.01026	0.175762	0.0837288	0.216959	0.0595429	0.516667	1.25	0.50355	0.780471
201–500	Jump	1	0.66	FLSA	-0.50655	0.37047	-0.12052	0.0183845	-0.113952	0.0206612	0.633333	1.33333	0.706575	0.89628
201–500	Jump	1	0.66	GAM	0.453574	0.263515	-7.58268e-05	0.00243128	0.0782591	0.00736473	0.216667	0.216667	0.85364	0.975409
201–500	Jump	1	0.66	LOWESS	0.386253	0.201111	-0.00800402	0.00274601	0.0787601	0.00809961	0.683333	1.45	0.788438	0.908223
201–500	Jump	1	0.66	MA	1.99775	4.15333	0.0356339	0.00310823	0.0714212	0.0063102	0	0	0.671427	0.906403
201–500	Jump	1	0.66	PELT	-0.0285566	0.307329	0.0230476	0.0129867	-0.0101152	0.0146095	-0.15	0.25	0.951805	0.963093
201–500	Jump	1	0.66	PR	0.412107	0.229504	-0.017707	0.00324414	0.0826769	0.00872543	-0.716667	0.75	0.773294	0.945424
201–500	Jump	1	1	ARIMA	1.44355	2.47912	0.13419	0.0341299	0.193429	0.0423711	0.183333	0.316667	0.603536	0.885021
201–500	Jump	1	1	FLSA	-0.442917	0.318355	-0.107336	0.0159193	-0.098181	0.0180244	1.01667	2.18333	0.673193	0.854008
201–500	Jump	1	1	GAM	0.451706	0.25141	0.000989504	0.00201783	0.0763343	0.00682721	0.366667	0.766667	0.832528	0.94604
201–500	Jump	1	1	LOWESS	0.383627	0.189473	-0.00875374	0.00221271	0.0758612	0.00715552	0.45	0.65	0.825004	0.953364
201–500	Jump	1	1	MA	1.81123	3.40137	0.0256816	0.00230417	0.064769	0.00525245	0	0	0.704197	0.923335
201–500	Jump	1	1	PELT	0.0240058	0.170962	0.0376576	0.00989384	0.00734193	0.0102878	-0.116667	0.15	0.951678	0.976067
201–500	Jump	1	1	PR	0.450613	0.252029	-0.00114565	0.00326836	0.0794435	0.00764684	-0.416667	0.583333	0.823197	0.955007
201–500	Jump	1	2	ARIMA	1.16611	1.4499	0.102021	0.0132243	0.171884	0.0309094	0.2	0.366667	0.660839	0.919499
201–500	Jump	1	2	FLSA	-0.490038	0.363496	-0.116912	0.0176538	-0.111917	0.0207492	0.816667	1.88333	0.685071	0.866805
201–500	Jump	1	2	GAM	0.445829	0.230149	0.000782255	0.00132477	0.0716956	0.00578713	0.316667	0.683333	0.843795	0.952138
201–500	Jump	1	2	LOWESS	0.376164	0.172662	-0.00937261	0.00163329	0.0716348	0.00605952	0.533333	0.733333	0.815784	0.950218
201–500	Jump	1	2	MA	1.63573	2.75543	0.0159952	0.00173501	0.0573693	0.00418484	0	0	0.736244	0.937986
201–500	Jump	1	2	PELT	0.0304026	0.122294	0.0364756	0.00738113	0.0121126	0.00780638	-0.1	0.1	0.951094	0.982769
201–500	Jump	1	2	PR	0.464746	0.251392	0.00751877	0.00264272	0.0676936	0.005591	-0.183333	0.45	0.860498	0.964275
201–500	Jump	2	0.33	ARIMA	2.08099	5.04148	0.263577	0.10884	0.277944	0.0810037	0.4	1.06667	0.418039	0.745738
201–500	Jump	2	0.33	FLSA	-0.976919	1.42575	-0.46918	0.280502	-0.228277	0.0818699	0.883333	1.91667	0.421624	0.720617
201–500	Jump	2	0.33	GAM	0.729053	0.664396	-0.029707	0.0244901	0.117184	0.0164255	0.383333	0.716667	0.75604	0.925322
201–500	Jump	2	0.33	LOWESS	0.685575	0.61228	-0.0594332	0.0290112	0.115057	0.0160831	0.516667	0.916667	0.730559	0.914387
201–500	Jump	2	0.33	MA	2.35868	5.77295	-0.0543814	0.0246451	0.0786863	0.00961376	0.0333333	0.0333333	0.609358	0.861806
201–500	Jump	2	0.33	PELT	0.0727484	0.394405	0.0844945	0.0731314	0.00934203	0.0214146	-0.0333333	0.1	0.932159	0.944403
201–500	Jump	2	0.33	PR	0.771475	0.74995	0.039672	0.0435573	0.0862262	0.00925356	0.25	0.583333	0.784475	0.930642
201–500	Jump	2	0.66	ARIMA	1.6559	3.06708	0.210159	0.0642503	0.243871	0.0614019	0.166667	0.566667	0.522967	0.836047
201–500	Jump	2	0.66	FLSA	-0.987317	1.49051	-0.463193	0.28115	-0.233757	0.0884177	0.95	2.15	0.413065	0.70323
201–500	Jump	2	0.66	GAM	0.664422	0.526217	-0.0154137	0.0163688	0.11134	0.0143827	0.266667	0.3	0.790524	0.954976
201–500	Jump	2	0.66	LOWESS	0.618426	0.483378	-0.0466497	0.0181475	0.099257	0.0113973	0.316667	0.316667	0.782379	0.956904
201–500	Jump	2	0.66	MA	1.99599	4.15248	-0.0861299	0.0266605	0.0646882	0.00694647	0.0166667	0.0166667	0.654914	0.898018
201–500	Jump	2	0.66	PELT	0.10849	0.0497467	0.096086	0.0272383	0.033813	0.00294052	0.0166667	0.0166667	0.90812	0.986575
201–500	Jump	2	0.66	PR	0.677918	0.583401	0.0508659	0.0282738	0.0727106	0.00626448	0.5	0.7	0.763686	0.935005
201–500	Jump	2	1	ARIMA	1.48959	2.42394	0.190054	0.0498935	0.229272	0.0540356	0.0833333	0.416667	0.566642	0.866656
201–500	Jump	2	1	FLSA	-1.06644	1.66773	-0.487852	0.302513	-0.256418	0.0999722	0.6	1.5	0.428176	0.717972
201–500	Jump	2	1	GAM	0.631177	0.466458	-0.00751762	0.0126235	0.108293	0.013374	0.25	0.283333	0.802736	0.959167
201–500	Jump	2	1	LOWESS	0.566165	0.394895	-0.0432571	0.0137795	0.0931984	0.00979514	0.3	0.366667	0.796649	0.958751
201–500	Jump	2	1	MA	1.82693	3.47083	-0.0993536	0.0279263	0.0583106	0.00588003	0.0166667	0.0166667	0.675164	0.912723
201–500	Jump	2	1	PELT	0.120364	0.0430029	0.0916988	0.0205181	0.0300408	0.00223942	0.0166667	0.0166667	0.911438	0.989516
201–500	Jump	2	1	PR	0.624376	0.517823	0.0681583	0.0211646	0.0669618	0.00539117	0.783333	1.01667	0.724042	0.922014
201–500	Jump	2	2	ARIMA	1.32788	1.86221	0.166268	0.0358453	0.210435	0.0453717	0	0	0.615416	0.910773
201–500	Jump	2	2	FLSA	-1.00964	1.52157	-0.473849	0.293192	-0.243451	0.0914434	0.7	1.53333	0.432358	0.727589
201–500	Jump	2	2	GAM	0.612856	0.42127	-0.00131554	0.00850945	0.104915	0.012205	0.266667	0.3	0.807854	0.961506
201–500	Jump	2	2	LOWESS	0.504089	0.302342	-0.0423401	0.00964138	0.0875325	0.00843827	0.333333	0.4	0.803512	0.961305
201–500	Jump	2	2	MA	1.63752	2.77193	-0.111953	0.0292596	0.0515563	0.0048247	0.05	0.0833333	0.693902	0.924271
201–500	Jump	2	2	PELT	0.104371	0.0253481	0.084069	0.0147868	0.027359	0.0015605	0	0	0.921995	0.99327
201–500	Jump	2	2	PR	0.516956	0.335802	0.066485	0.015739	0.0632641	0.00466796	0.966667	1.43333	0.71175	0.905051
201–500	Linear	0.25	0.33	ARIMA	-0.164168	0.153466	-0.00796755	0.000442964	-0.0804215	0.00901783	-1.91667	3.75	0.62383	0.782792
201–500	Linear	0.25	0.33	FLSA	-0.0562095	0.0906985	-0.00471151	0.000218108	-0.0542396	0.00406163	-0.4	1.5	0.888911	0.911627
201–500	Linear	0.25	0.33	GAM	0.0161994	0.0220043	-0.00419221	8.20524e-05	-0.0264414	0.0019806	-0.966667	0.966667	0.819487	0.94421
201–500	Linear	0.25	0.33	LOWESS	0.0497171	0.0207343	-0.00314195	6.43411e-05	-0.0223437	0.00131859	-0.666667	0.833333	0.867593	0.952179
201–500	Linear	0.25	0.33	MA	3.3674	11.6597	0.0906795	0.00898075	0.0666017	0.00476108	-1	1	0.396275	0.707118
201–500	Linear	0.25	0.33	PELT	-0.211903	0.134815	-0.0111807	0.000165503	-0.091255	0.0084379	-1.96667	3.93333	0.605283	0.773507
201–500	Linear	0.25	0.33	PR	0.0986696	0.301377	0.00151189	0.00136925	-0.0247227	0.00246616	-1.96667	3.9	0.651114	0.776258
201–500	Linear	0.25	0.66	ARIMA	-0.14369	0.135715	-0.00780702	0.000262906	-0.0768392	0.00841151	-1.88333	3.65	0.63258	0.78906
201–500	Linear	0.25	0.66	FLSA	-0.0940678	0.0572985	-0.00733707	0.000112362	-0.0592836	0.00434674	-0.266667	1.33333	0.900637	0.921291
201–500	Linear	0.25	0.66	GAM	-0.0447139	0.0163717	-0.00725547	7.62094e-05	-0.0417015	0.0025887	-0.983333	0.983333	0.803176	0.942902
201–500	Linear	0.25	0.66	LOWESS	-0.0136682	0.0112335	-0.00646985	6.25505e-05	-0.0373827	0.0019413	-0.7	0.8	0.855435	0.953704
201–500	Linear	0.25	0.66	MA	2.58713	6.92891	0.0511917	0.0029215	0.0334328	0.00133111	-1	1	0.509344	0.805133
201–500	Linear	0.25	0.66	PELT	-0.250306	0.0626807	-0.0120088	0.000144211	-0.0926121	0.0085771	-1.98333	3.95	0.598334	0.773686
201–500	Linear	0.25	0.66	PR	-0.00953454	0.119304	-0.00525181	0.000362259	-0.0401069	0.00283907	-1.98333	3.95	0.647226	0.776563
201–500	Linear	0.25	1	ARIMA	-0.177226	0.0919577	-0.00985871	0.000151003	-0.0818238	0.00799558	-1.91667	3.75	0.621033	0.784609
201–500	Linear	0.25	1	FLSA	-0.116075	0.0348944	-0.00831539	9.0771e-05	-0.0583835	0.00417695	-0.116667	1.15	0.921535	0.932011
201–500	Linear	0.25	1	GAM	-0.0712693	0.0167375	-0.00834848	8.3539e-05	-0.0482918	0.00302027	-0.983333	0.983333	0.795871	0.942539
201–500	Linear	0.25	1	LOWESS	-0.0398998	0.0102361	-0.00762742	7.0863e-05	-0.0436713	0.00235306	-0.716667	0.816667	0.845247	0.952457
201–500	Linear	0.25	1	MA	2.23587	5.17495	0.0369232	0.00153227	0.0194399	0.000550504	-1	1	0.560189	0.840924
201–500	Linear	0.25	1	PELT	-0.222003	0.0987483	-0.0118061	0.000141808	-0.0925	0.00855705	-1.98333	3.95	0.600982	0.773109
201–500	Linear	0.25	1	PR	-0.0451208	0.0796969	-0.00694026	0.000221229	-0.0470718	0.00323235	-1.98333	3.95	0.639964	0.776993
201–500	Linear	0.25	2	ARIMA	-0.122173	0.118655	-0.00803313	0.000191718	-0.0736791	0.00768924	-1.85	3.55	0.641084	0.795372
201–500	Linear	0.25	2	FLSA	-0.147169	0.0350036	-0.00977357	0.000104129	-0.0659546	0.00485899	-0.0166667	1.08333	0.927223	0.935137
201–500	Linear	0.25	2	GAM	-0.103735	0.0193042	-0.00948412	9.6515e-05	-0.056149	0.00366556	-0.983333	0.983333	0.787173	0.941956
201–500	Linear	0.25	2	LOWESS	-0.0729841	0.0114808	-0.00883871	8.47221e-05	-0.0511669	0.00296641	-0.7	0.866667	0.838867	0.94915
201–500	Linear	0.25	2	MA	1.93923	3.93476	0.0241801	0.000658756	0.00362778	0.000154958	-1	1	0.606369	0.866091
201–500	Linear	0.25	2	PELT	-0.250958	0.0629808	-0.012009	0.000144216	-0.0926169	0.00857799	-2	4	0.595767	0.770927
201–500	Linear	0.25	2	PR	-0.111522	0.0208189	-0.00967437	9.98851e-05	-0.0576606	0.00384293	-2	4	0.625158	0.774818
201–500	Linear	0.5	0.33	ARIMA	0.125851	2.65094	0.0345074	0.136121	-0.105176	0.0546609	-1.71667	3.15	0.632632	0.699944
201–500	Linear	0.5	0.33	FLSA	-0.240124	0.082334	-0.0326389	0.0012211	-0.099055	0.0123559	0.0833333	0.95	0.870861	0.935057
201–500	Linear	0.5	0.33	GAM	0.100519	0.0348123	-0.0152755	0.000513738	-0.0352856	0.00267767	-0.966667	0.966667	0.799065	0.943243
201–500	Linear	0.5	0.33	LOWESS	0.108175	0.0337568	-0.0133944	0.000391756	-0.0334226	0.00220497	-0.733333	0.8	0.837727	0.952926
201–500	Linear	0.5	0.33	MA	3.21443	10.7291	0.0678864	0.00501184	0.00881047	0.000646016	-1	1	0.450613	0.729877
201–500	Linear	0.5	0.33	PELT	-0.501915	0.251923	-0.0480359	0.00230745	-0.185234	0.034312	-2	4	0.515405	0.74983
201–500	Linear	0.5	0.33	PR	0.141736	0.181233	-0.0121818	0.00141821	-0.0325524	0.0031873	-1.98333	3.95	0.635286	0.774969
201–500	Linear	0.5	0.66	ARIMA	1.20815	7.22882	0.181829	0.221112	0.0315272	0.0985307	-1.5	2.5	0.530462	0.601564
201–500	Linear	0.5	0.66	FLSA	-0.284881	0.100407	-0.0363605	0.00142495	-0.110172	0.0144133	0.15	1.25	0.845992	0.916522
201–500	Linear	0.5	0.66	GAM	0.0427796	0.0173959	-0.0216512	0.000609217	-0.049954	0.00340158	-0.95	0.95	0.796296	0.943888
201–500	Linear	0.5	0.66	LOWESS	0.0464867	0.0163292	-0.0201902	0.000515478	-0.0483439	0.00307602	-0.733333	0.766667	0.832272	0.954361
201–500	Linear	0.5	0.66	MA	2.51397	6.60903	0.0291446	0.0010068	-0.0213362	0.00100968	-1	1	0.53188	0.812273
201–500	Linear	0.5	0.66	PELT	-0.499919	0.250166	-0.0480341	0.00230728	-0.185219	0.0343065	-1.98333	3.95	0.51782	0.752543
201–500	Linear	0.5	0.66	PR	0.0735275	0.107021	-0.0201334	0.000882556	-0.048145	0.00357729	-1.98333	3.95	0.629932	0.776096
201–500	Linear	0.5	1	ARIMA	0.69518	3.53517	0.0744977	0.0876793	-0.0384118	0.0563865	-1.5	2.5	0.624256	0.72991
201–500	Linear	0.5	1	FLSA	-0.329866	0.124661	-0.0394006	0.00163479	-0.122123	0.0170582	-0.116667	1.08333	0.835773	0.922949
201–500	Linear	0.5	1	GAM	0.0162867	0.0128848	-0.0242705	0.000689882	-0.0565345	0.00392854	-0.966667	0.966667	0.79139	0.942596
201–500	Linear	0.5	1	LOWESS	0.0194133	0.0117382	-0.0229417	0.000604961	-0.0550318	0.00365495	-0.733333	0.766667	0.829924	0.953944
201–500	Linear	0.5	1	MA	2.30185	5.60322	0.0163652	0.000396388	-0.0332588	0.00172469	-1	1	0.552977	0.831804
201–500	Linear	0.5	1	PELT	-0.471404	0.277145	-0.0478107	0.00228883	-0.185111	0.034267	-1.98333	3.95	0.520406	0.752134
201–500	Linear	0.5	1	PR	0.0408372	0.0743101	-0.0233227	0.000825492	-0.0551217	0.00403281	-1.98333	3.95	0.627927	0.776343
201–500	Linear	0.5	2	ARIMA	0.49818	2.09768	0.025571	0.0372024	-0.0662873	0.0359719	-1.46667	2.4	0.658293	0.790208
201–500	Linear	0.5	2	FLSA	-0.326159	0.121604	-0.0397268	0.00163384	-0.122057	0.0166492	0	1.23333	0.853094	0.91515
201–500	Linear	0.5	2	GAM	-0.0169174	0.00993909	-0.0272766	0.000809128	-0.0648119	0.004769	-0.966667	0.966667	0.785011	0.941928
201–500	Linear	0.5	2	LOWESS	-0.0134568	0.00871629	-0.026129	0.000736486	-0.0634351	0.00455041	-0.733333	0.733333	0.823899	0.955064
201–500	Linear	0.5	2	MA	2.07853	4.54553	0.00448789	8.79917e-05	-0.0462695	0.00279298	-1	1	0.574626	0.851994
201–500	Linear	0.5	2	PELT	-0.501915	0.251923	-0.0480359	0.00230745	-0.185234	0.034312	-2	4	0.515405	0.74983
201–500	Linear	0.5	2	PR	-0.0255402	0.0102467	-0.0281597	0.000856188	-0.0657881	0.00491158	-2	4	0.619228	0.774024
201–500	Linear	1	0.33	ARIMA	2.24889	8.15016	0.155832	0.222711	0.0668633	0.0375991	-0.833333	1.23333	0.507049	0.68352
201–500	Linear	1	0.33	FLSA	-0.662529	0.500836	-0.154983	0.0256572	-0.237679	0.0654608	-0.233333	1.16667	0.654268	0.864497
201–500	Linear	1	0.33	GAM	0.266911	0.100694	-0.0478199	0.00345623	-0.0477722	0.00363106	-0.783333	0.85	0.785129	0.946639
201–500	Linear	1	0.33	LOWESS	0.271024	0.0982007	-0.0422314	0.00266565	-0.0434716	0.00299124	-0.766667	0.8	0.792667	0.95024
201–500	Linear	1	0.33	MA	2.40291	6.27158	0.0136831	0.000726865	-0.0323988	0.0022997	-1	1	0.54337	0.817988
201–500	Linear	1	0.33	PELT	-0.949868	1.07448	-0.190707	0.0364905	-0.368413	0.135974	-1.96667	3.93333	0.350645	0.661561
201–500	Linear	1	0.33	PR	0.362122	0.682214	-0.0465486	0.0068261	-0.0474286	0.00471006	-1.96667	3.93333	0.594038	0.7649
201–500	Linear	1	0.66	ARIMA	1.6787	4.74616	0.0910389	0.100778	0.0446499	0.0235269	-0.75	0.916667	0.614897	0.806042
201–500	Linear	1	0.66	FLSA	-0.721833	0.58205	-0.162856	0.0279256	-0.262361	0.0769159	-0.266667	1.3	0.625281	0.846216
201–500	Linear	1	0.66	GAM	0.199744	0.0607207	-0.0596782	0.00418694	-0.061367	0.00460266	-0.783333	0.816667	0.778606	0.948241
201–500	Linear	1	0.66	LOWESS	0.209131	0.0605361	-0.0563501	0.00368444	-0.0580251	0.0041087	-0.866667	0.866667	0.768271	0.946052
201–500	Linear	1	0.66	MA	1.63465	2.92586	-0.0231621	0.00084943	-0.0505456	0.00353359	-0.983333	0.983333	0.615531	0.884139
201–500	Linear	1	0.66	PELT	-0.835939	0.90992	-0.169921	0.0320878	-0.323337	0.11915	-1.8	3.5	0.403025	0.697827
201–500	Linear	1	0.66	PR	0.242744	0.118003	-0.0632464	0.005064	-0.0625397	0.00512175	-1.98333	3.95	0.586402	0.773509
201–500	Linear	1	1	ARIMA	1.43863	3.43903	0.0676209	0.0673674	0.0350522	0.0182661	-0.85	0.883333	0.643826	0.847048
201–500	Linear	1	1	FLSA	-0.718462	0.569363	-0.164028	0.027965	-0.258966	0.0746353	-0.2	1.3	0.635285	0.848262
201–500	Linear	1	1	GAM	0.16836	0.0457395	-0.0645588	0.00462081	-0.0673498	0.0052106	-0.75	0.783333	0.781288	0.949739
201–500	Linear	1	1	LOWESS	0.183431	0.0467931	-0.0622612	0.00427155	-0.0647101	0.00482156	-0.9	0.9	0.759051	0.943706
201–500	Linear	1	1	MA	1.40904	2.17907	-0.0366882	0.00159399	-0.0590374	0.00435458	-0.983333	0.983333	0.629599	0.898054
201–500	Linear	1	1	PELT	-0.683096	0.68505	-0.135766	0.0239687	-0.251764	0.0882283	-1.6	2.86667	0.48373	0.757278
201–500	Linear	1	1	PR	0.263619	0.290194	-0.0660914	0.00599752	-0.0672782	0.00595721	-1.95	3.88333	0.586215	0.773489
201–500	Linear	1	2	ARIMA	1.02302	1.70253	0.016001	0.0255223	0.0099354	0.00841243	-0.866667	0.9	0.725652	0.9011
201–500	Linear	1	2	FLSA	-0.784103	0.653551	-0.173201	0.0306174	-0.285316	0.0868975	-0.416667	1.41667	0.582921	0.830189
201–500	Linear	1	2	GAM	0.128359	0.0292167	-0.0704322	0.00525477	-0.0746728	0.00610848	-0.733333	0.766667	0.781054	0.950042
201–500	Linear	1	2	LOWESS	0.147533	0.0317866	-0.0694368	0.00510742	-0.0731089	0.00588564	-0.866667	0.866667	0.759671	0.944699
201–500	Linear	1	2	MA	1.17767	1.48438	-0.0510599	0.00279655	-0.0695177	0.00564298	-0.95	0.95	0.646858	0.912187
201–500	Linear	1	2	PELT	-0.48342	0.370051	-0.0984852	0.014147	-0.172957	0.0505695	-1.3	1.96667	0.594727	0.84042
201–500	Linear	1	2	PR	0.154507	0.0336848	-0.0785194	0.00652968	-0.0800144	0.006978	-2	4	0.575774	0.7704
201–500	Linear	2	0.33	ARIMA	2.15113	7.13223	0.153659	0.158292	0.0915675	0.0191091	-0.833333	0.933333	0.504699	0.747136
201–500	Linear	2	0.33	FLSA	-1.48793	2.4431	-0.661553	0.462292	-0.538541	0.323693	-0.4	1.3	0.243291	0.518727
201–500	Linear	2	0.33	GAM	0.414456	0.245374	-0.11655	0.0173548	-0.0481034	0.00355272	-0.316667	0.516667	0.804443	0.957653
201–500	Linear	2	0.33	LOWESS	0.491805	0.297874	-0.133509	0.0213302	-0.060057	0.00472645	-0.566667	0.766667	0.742445	0.94057
201–500	Linear	2	0.33	MA	1.79201	3.43041	-0.103563	0.0142974	-0.0607817	0.00554515	-0.8	0.8	0.582284	0.877807
201–500	Linear	2	0.33	PELT	-0.249718	0.0768959	-0.058697	0.00708999	-0.0963769	0.0127189	-0.983333	0.983333	0.723323	0.931136
201–500	Linear	2	0.33	PR	0.675165	0.511995	-0.162356	0.0354235	-0.0724363	0.00732039	-1.91667	3.75	0.507718	0.766705
201–500	Linear	2	0.66	ARIMA	1.41429	2.41202	0.0318135	0.0111893	0.057824	0.00490488	-0.8	0.933333	0.655395	0.89263
201–500	Linear	2	0.66	FLSA	-1.49758	2.40497	-0.676793	0.472236	-0.543388	0.318303	-0.166667	1.1	0.253621	0.528256
201–500	Linear	2	0.66	GAM	0.282824	0.135831	-0.131687	0.0194485	-0.0554009	0.00396669	-0.133333	0.566667	0.835902	0.956084
201–500	Linear	2	0.66	LOWESS	0.346282	0.171935	-0.159508	0.0274869	-0.072178	0.00600774	-0.433333	0.566667	0.758593	0.951038
201–500	Linear	2	0.66	MA	1.30626	1.83427	-0.149201	0.0255565	-0.0752222	0.00735405	-0.766667	0.8	0.611127	0.904654
201–500	Linear	2	0.66	PELT	-0.281429	0.119614	-0.101743	0.0124031	-0.117981	0.0164551	-0.933333	0.933333	0.694194	0.928256
201–500	Linear	2	0.66	PR	0.61283	0.456999	-0.149884	0.0283606	-0.0751472	0.00712403	-1.51667	2.58333	0.575295	0.833815
201–500	Linear	2	1	ARIMA	1.22246	1.7442	0.00687977	0.00697982	0.0481724	0.00349344	-0.833333	0.866667	0.689398	0.911912
201–500	Linear	2	1	FLSA	-1.54922	2.5296	-0.693	0.4893	-0.561844	0.334827	-0.283333	1.11667	0.230382	0.510703
201–500	Linear	2	1	GAM	0.223285	0.0962181	-0.138617	0.0207964	-0.0589474	0.00426827	-0.05	0.516667	0.850177	0.958955
201–500	Linear	2	1	LOWESS	0.278186	0.125037	-0.170239	0.0305466	-0.0774009	0.00669747	-0.316667	0.55	0.775423	0.951332
201–500	Linear	2	1	MA	1.12006	1.34928	-0.167382	0.0312234	-0.0816612	0.0082907	-0.85	0.883333	0.608088	0.907271
201–500	Linear	2	1	PELT	-0.314828	0.156449	-0.120209	0.016034	-0.117806	0.0155936	-0.95	0.95	0.679346	0.926147
201–500	Linear	2	1	PR	0.536652	0.309805	-0.143952	0.0233509	-0.0758553	0.00663759	-1.25	1.81667	0.623534	0.880485
201–500	Linear	2	2	ARIMA	0.997971	1.12377	-0.0286963	0.00417788	0.0324367	0.00177612	-0.783333	0.85	0.72109	0.927494
201–500	Linear	2	2	FLSA	-1.57089	2.5676	-0.702723	0.498812	-0.56924	0.339292	0.0166667	0.95	0.241395	0.511081
201–500	Linear	2	2	GAM	0.153436	0.0563179	-0.14797	0.0229892	-0.0639689	0.00478753	0.0833333	0.416667	0.845439	0.964139
201–500	Linear	2	2	LOWESS	0.18975	0.0690781	-0.18271	0.0344794	-0.0836699	0.00764098	-0.333333	0.433333	0.772851	0.956824
201–500	Linear	2	2	MA	0.937084	0.935549	-0.18814	0.0385342	-0.0900017	0.00963611	-0.916667	0.95	0.603877	0.908414
201–500	Linear	2	2	PELT	-0.374292	0.142456	-0.141863	0.0211636	-0.126216	0.0171106	-1	1	0.65113	0.920804
201–500	Linear	2	2	PR	0.409101	0.214497	-0.140444	0.0211783	-0.0761397	0.00668351	-0.883333	0.983333	0.691783	0.92876
201–500	Quadratic	0.25	0.33	ARIMA	0.0668639	0.40192	0.00836692	0.00137938	-0.019959	0.0081585	-2.76667	7.83333	0.522123	0.555613
201–500	Quadratic	0.25	0.33	FLSA	-0.0988009	0.0278433	-0.000975417	7.37063e-05	-0.0198557	0.00207683	-1.15	2.48333	0.786105	0.859959
201–500	Quadratic	0.25	0.33	GAM	-0.00564546	0.0307823	0.000412842	7.06805e-05	-0.0036576	0.00186007	-1.9	3.7	0.680866	0.792629
201–500	Quadratic	0.25	0.33	LOWESS	0.0441795	0.0232103	0.00158858	6.4703e-05	0.00410702	0.00122798	-1.75	3.41667	0.701287	0.808908
201–500	Quadratic	0.25	0.33	MA	3.65001	13.6866	0.106929	0.0127541	0.103903	0.0116533	-2	4	0.268882	0.543472
201–500	Quadratic	0.25	0.33	PELT	-0.250384	0.0626925	-0.00712254	5.07307e-05	-0.0644626	0.00415545	-3	9	0.457449	0.497527
201–500	Quadratic	0.25	0.33	PR	-0.0757321	0.0253628	-0.00290153	4.30117e-05	-0.02066	0.00166588	-3	9	0.486259	0.498999
201–500	Quadratic	0.25	0.66	ARIMA	0.120527	0.267669	0.004536	0.000347121	-0.0126993	0.00492455	-2.6	7	0.550155	0.604958
201–500	Quadratic	0.25	0.66	FLSA	-0.110238	0.0289828	-0.0022292	6.54064e-05	-0.025299	0.00187681	-1.08333	2.51667	0.791921	0.858243
201–500	Quadratic	0.25	0.66	GAM	-0.054387	0.0204874	-0.00241389	3.21563e-05	-0.0157006	0.00132402	-1.83333	3.5	0.680577	0.804275
201–500	Quadratic	0.25	0.66	LOWESS	-0.0159832	0.0130201	-0.0016157	2.55489e-05	-0.00957043	0.00082317	-1.75	3.41667	0.701257	0.809378
201–500	Quadratic	0.25	0.66	MA	2.94078	9.0694	0.0670855	0.00510429	0.0734511	0.00592895	-2	4	0.35129	0.624324
201–500	Quadratic	0.25	0.66	PELT	-0.234481	0.0698712	-0.00703963	4.99613e-05	-0.0643755	0.00414467	-2.98333	8.91667	0.461138	0.502062
201–500	Quadratic	0.25	0.66	PR	-0.115792	0.0239711	-0.00470813	3.33768e-05	-0.0307073	0.00161013	-3	9	0.479179	0.49904
201–500	Quadratic	0.25	1	ARIMA	0.222047	0.286536	0.00634784	0.000323687	0.000856089	0.00432226	-2.45	6.25	0.570419	0.646303
201–500	Quadratic	0.25	1	FLSA	-0.130828	0.0301555	-0.00292239	5.56251e-05	-0.0290826	0.00193266	-1	2.4	0.800541	0.86465
201–500	Quadratic	0.25	1	GAM	-0.0759343	0.0182701	-0.00348639	2.72231e-05	-0.0210402	0.00122525	-1.81667	3.45	0.678164	0.807157
201–500	Quadratic	0.25	1	LOWESS	-0.0362171	0.0116521	-0.00249712	2.45672e-05	-0.014519	0.000850231	-1.73333	3.33333	0.699191	0.814008
201–500	Quadratic	0.25	1	MA	2.74886	7.90619	0.0543804	0.00334282	0.060038	0.00399008	-2	4	0.377372	0.645063
201–500	Quadratic	0.25	1	PELT	-0.21045	0.138408	-0.00644253	6.8799e-05	-0.0641417	0.00412033	-2.96667	8.86667	0.465698	0.504101
201–500	Quadratic	0.25	1	PR	-0.133384	0.0252778	-0.00534011	3.44451e-05	-0.0351195	0.00170629	-3	9	0.476164	0.498985
201–500	Quadratic	0.25	2	ARIMA	0.236485	0.232464	0.00527605	0.000221275	0.00302476	0.00335098	-2.36667	5.83333	0.582408	0.670594
201–500	Quadratic	0.25	2	FLSA	-0.148564	0.0298092	-0.00412637	4.06684e-05	-0.0342999	0.0018857	-1.13333	2.5	0.773686	0.859153
201–500	Quadratic	0.25	2	GAM	-0.103941	0.0185158	-0.00464976	2.78658e-05	-0.0280315	0.00127356	-1.81667	3.45	0.671593	0.807119
201–500	Quadratic	0.25	2	LOWESS	-0.0612461	0.00923631	-0.00378812	2.03053e-05	-0.0213638	0.00079573	-1.75	3.31667	0.690059	0.815014
201–500	Quadratic	0.25	2	MA	2.61525	7.06073	0.0430106	0.00208182	0.0455533	0.00231201	-2	4	0.39897	0.660331
201–500	Quadratic	0.25	2	PELT	-0.250384	0.0626925	-0.00712254	5.07307e-05	-0.0644626	0.00415545	-3	9	0.457449	0.497527
201–500	Quadratic	0.25	2	PR	-0.154777	0.028455	-0.0059747	3.79174e-05	-0.0404847	0.00192344	-3	9	0.472573	0.498856
201–500	Quadratic	0.5	0.33	ARIMA	-0.110212	0.358454	-0.0126851	0.00110032	-0.0734655	0.0124307	-2.63333	7.16667	0.517838	0.590491
201–500	Quadratic	0.5	0.33	FLSA	-0.308667	0.120965	-0.0181804	0.000567774	-0.0668003	0.0072584	-1	2.23333	0.751467	0.868013
201–500	Quadratic	0.5	0.33	GAM	-0.142633	0.0916455	-0.0118614	0.000458277	-0.0412757	0.00606848	-1.71667	3.18333	0.673722	0.81709
201–500	Quadratic	0.5	0.33	LOWESS	-0.0937893	0.0502667	-0.0115095	0.000358143	-0.0335813	0.00380529	-1.8	3.53333	0.668868	0.800091
201–500	Quadratic	0.5	0.33	MA	3.28827	11.1957	0.0859601	0.00853464	0.0541679	0.00439915	-2	4	0.325065	0.589844
201–500	Quadratic	0.5	0.33	PELT	-0.500767	0.25077	-0.0284902	0.000811691	-0.128925	0.0166218	-3	9	0.408821	0.489911
201–500	Quadratic	0.5	0.33	PR	-0.300452	0.123697	-0.0222944	0.00059968	-0.0786744	0.00830917	-3	9	0.441634	0.49491
201–500	Quadratic	0.5	0.66	ARIMA	-0.139469	0.252594	-0.0176045	0.000598825	-0.0784775	0.010552	-2.58333	6.91667	0.518955	0.606657
201–500	Quadratic	0.5	0.66	FLSA	-0.315732	0.121271	-0.0189016	0.000542497	-0.0694992	0.00726167	-1.11667	2.21667	0.7311	0.86893
201–500	Quadratic	0.5	0.66	GAM	-0.158194	0.0731254	-0.0145731	0.000396648	-0.045807	0.00516268	-1.76667	3.33333	0.660723	0.809793
201–500	Quadratic	0.5	0.66	LOWESS	-0.125496	0.0387919	-0.0153604	0.000324646	-0.0423974	0.0031286	-1.83333	3.5	0.654379	0.802611
201–500	Quadratic	0.5	0.66	MA	2.59798	7.15992	0.0476842	0.00281504	0.024481	0.00160835	-2	4	0.408136	0.658981
201–500	Quadratic	0.5	0.66	PELT	-0.484771	0.250039	-0.0284063	0.00080733	-0.128838	0.0165997	-2.98333	8.91667	0.412272	0.494469
201–500	Quadratic	0.5	0.66	PR	-0.322997	0.126838	-0.0239325	0.000617887	-0.084331	0.00854147	-3	9	0.437449	0.49477
201–500	Quadratic	0.5	1	ARIMA	-0.106595	0.24607	-0.0172198	0.000575615	-0.074853	0.00983826	-2.53333	6.66667	0.530786	0.620828
201–500	Quadratic	0.5	1	FLSA	-0.333581	0.129685	-0.0205805	0.000539811	-0.074563	0.00750675	-1.23333	2.73333	0.707959	0.840151
201–500	Quadratic	0.5	1	GAM	-0.155719	0.0602693	-0.0154211	0.000374707	-0.0458721	0.00443162	-1.7	3.2	0.671003	0.817905
201–500	Quadratic	0.5	1	LOWESS	-0.131758	0.0352336	-0.0161961	0.000330339	-0.0441775	0.0029658	-1.88333	3.68333	0.644589	0.792632
201–500	Quadratic	0.5	1	MA	2.32581	5.79984	0.035115	0.00160997	0.0138568	0.0010252	-2	4	0.440766	0.681906
201–500	Quadratic	0.5	1	PELT	-0.458189	0.316965	-0.0276549	0.000806006	-0.127953	0.0164282	-2.96667	8.86667	0.41701	0.496555
201–500	Quadratic	0.5	1	PR	-0.329811	0.127071	-0.0244881	0.000628777	-0.0860416	0.00856614	-3	9	0.436157	0.494754
201–500	Quadratic	0.5	2	ARIMA	-0.0785333	0.202114	-0.0172755	0.000539328	-0.0703354	0.00869247	-2.45	6.25	0.547719	0.64492
201–500	Quadratic	0.5	2	FLSA	-0.319591	0.115611	-0.0206727	0.000500909	-0.0707754	0.00643024	-0.916667	1.71667	0.759373	0.897235
201–500	Quadratic	0.5	2	GAM	-0.142681	0.0411144	-0.0160166	0.000339657	-0.0437997	0.00326474	-1.7	3.1	0.672929	0.824613
201–500	Quadratic	0.5	2	LOWESS	-0.134946	0.0308544	-0.0170169	0.000340697	-0.0461606	0.00281644	-1.9	3.7	0.640302	0.791881
201–500	Quadratic	0.5	2	MA	1.89485	4.02045	0.0214013	0.000729589	0.00422748	0.000561459	-1.98333	3.95	0.489912	0.714064
201–500	Quadratic	0.5	2	PELT	-0.500767	0.25077	-0.0284902	0.000811691	-0.128925	0.0166218	-3	9	0.408821	0.489911
201–500	Quadratic	0.5	2	PR	-0.3321	0.122983	-0.0250259	0.00064176	-0.0866184	0.00831106	-3	9	0.435547	0.494903
201–500	Quadratic	1	0.33	ARIMA	-0.0445816	1.84068	-0.0456874	0.0137467	-0.131777	0.0440841	-2.51667	6.61667	0.501352	0.579664
201–500	Quadratic	1	0.33	FLSA	-0.679748	0.507996	-0.0874022	0.00855226	-0.153256	0.0287881	-1.01667	2.08333	0.628525	0.850082
201–500	Quadratic	1	0.33	GAM	-0.119696	0.112805	-0.0366876	0.00361809	-0.039449	0.00780052	-1.43333	3.13333	0.70874	0.817215
201–500	Quadratic	1	0.33	LOWESS	-0.135474	0.103047	-0.0463984	0.00383618	-0.0583242	0.008435	-1.8	3.4	0.634898	0.802186
201–500	Quadratic	1	0.33	MA	2.31366	5.78903	0.0308995	0.00280799	-0.00495957	0.00459045	-2	4	0.447401	0.679339
201–500	Quadratic	1	0.33	PELT	-1.00153	1.00308	-0.113961	0.0129871	-0.257851	0.0664873	-3	9	0.300738	0.456762
201–500	Quadratic	1	0.33	PR	-0.345057	0.359514	-0.0651233	0.00845689	-0.101933	0.0214154	-2.85	8.25	0.43195	0.524831
201–500	Quadratic	1	0.66	ARIMA	0.621786	2.14917	-0.00086177	0.00962099	-0.0403961	0.0269424	-2.28333	5.41667	0.550521	0.64828
201–500	Quadratic	1	0.66	FLSA	-0.676767	0.502659	-0.0876194	0.00837351	-0.154989	0.0287082	-1.16667	2.66667	0.607728	0.819039
201–500	Quadratic	1	0.66	GAM	-0.0863788	0.0623441	-0.0333924	0.0027002	-0.0324829	0.00512889	-1.7	3.26667	0.674417	0.812931
201–500	Quadratic	1	0.66	LOWESS	-0.107713	0.0717196	-0.0448989	0.00328134	-0.0542318	0.00648654	-1.88333	3.65	0.626913	0.790475
201–500	Quadratic	1	0.66	MA	1.48846	2.55529	-0.00137886	0.00104674	-0.0187604	0.00322373	-1.98333	3.95	0.527646	0.736173
201–500	Quadratic	1	0.66	PELT	-0.985351	0.98625	-0.113875	0.0129679	-0.257762	0.066442	-2.98333	8.91667	0.303657	0.461229
201–500	Quadratic	1	0.66	PR	-0.198391	0.286443	-0.0510501	0.00637563	-0.0738883	0.0159762	-2.65	7.25	0.488922	0.583318
201–500	Quadratic	1	1	ARIMA	0.873946	2.10705	0.0125224	0.00731919	-0.00789272	0.0194771	-2.15	4.85	0.557469	0.68366
201–500	Quadratic	1	1	FLSA	-0.674036	0.495201	-0.0871876	0.00814064	-0.155544	0.028455	-1	2.26667	0.630211	0.840875
201–500	Quadratic	1	1	GAM	-0.0702239	0.0417722	-0.03141	0.00223083	-0.0278369	0.00371338	-1.76667	3.73333	0.668433	0.78862
201–500	Quadratic	1	1	LOWESS	-0.0956814	0.0564102	-0.0447282	0.00300567	-0.0525479	0.00553414	-1.91667	3.75	0.623546	0.785955
201–500	Quadratic	1	1	MA	1.21497	1.76497	-0.0106177	0.000775346	-0.0216043	0.00238072	-1.98333	3.95	0.546423	0.749775
201–500	Quadratic	1	1	PELT	-0.894424	1.03977	-0.10787	0.0124059	-0.248549	0.0636085	-2.9	8.6	0.32399	0.478305
201–500	Quadratic	1	1	PR	-0.112101	0.218952	-0.0448721	0.00489502	-0.0590969	0.0118058	-2.5	6.5	0.527268	0.627839
201–500	Quadratic	1	2	ARIMA	1.28203	2.12892	0.0305199	0.00347811	0.0408829	0.00648069	-2.01667	4.11667	0.518352	0.731407
201–500	Quadratic	1	2	FLSA	-0.710305	0.542243	-0.0912753	0.00873278	-0.166868	0.031748	-1.23333	2.53333	0.587758	0.823105
201–500	Quadratic	1	2	GAM	-0.0579035	0.0232393	-0.0287778	0.00162449	-0.0214758	0.00208178	-1.85	3.78333	0.660437	0.787474
201–500	Quadratic	1	2	LOWESS	-0.0698406	0.0325543	-0.0421829	0.00241015	-0.0466093	0.0037512	-1.98333	3.95	0.619194	0.776699
201–500	Quadratic	1	2	MA	0.865967	0.931516	-0.0191172	0.000697253	-0.0245126	0.00179555	-2	4	0.569375	0.761132
201–500	Quadratic	1	2	PELT	-0.980905	0.987357	-0.111638	0.0127818	-0.253629	0.0653816	-2.96667	8.86667	0.307964	0.464296
201–500	Quadratic	1	2	PR	0.0685942	0.0841498	-0.03105	0.00224396	-0.027295	0.00372788	-2.18333	4.91667	0.601532	0.722489
201–500	Quadratic	2	0.33	ARIMA	1.90489	4.89537	0.0998722	0.0354034	0.0902972	0.0149827	-1.86667	3.66667	0.433402	0.693838
201–500	Quadratic	2	0.33	FLSA	-1.44633	2.23123	-0.37004	0.143119	-0.343175	0.131686	-1.11667	2.35	0.347039	0.690159
201–500	Quadratic	2	0.33	GAM	-0.016965	0.106477	-0.0738102	0.0211017	-0.0230891	0.008414	-1.35	3.68333	0.720583	0.780935
201–500	Quadratic	2	0.33	LOWESS	-0.082552	0.109501	-0.138138	0.0294215	-0.0752971	0.0121731	-1.9	3.8	0.568301	0.769224
201–500	Quadratic	2	0.33	MA	1.42024	2.35355	-0.0917283	0.0180639	-0.0608015	0.0107268	-2	4	0.473511	0.726536
201–500	Quadratic	2	0.33	PELT	-1.02992	1.68804	-0.187188	0.0789539	-0.231404	0.0978332	-2.25	5.45	0.36632	0.590649
201–500	Quadratic	2	0.33	PR	0.346967	0.31788	-0.0709298	0.0212495	-0.0201304	0.00825531	-1.98333	4.08333	0.592158	0.755581
201–500	Quadratic	2	0.66	ARIMA	1.64214	3.41227	0.082745	0.0208424	0.085274	0.0112438	-1.95	3.85	0.454578	0.715849
201–500	Quadratic	2	0.66	FLSA	-1.50226	2.39911	-0.378688	0.148458	-0.360146	0.143891	-1.28333	3.11667	0.317417	0.641982
201–500	Quadratic	2	0.66	GAM	-0.00630013	0.0653517	-0.0577831	0.0121926	-0.00946349	0.00378666	-1.73333	3.86667	0.673959	0.777549
201–500	Quadratic	2	0.66	LOWESS	-0.0820323	0.0591705	-0.125243	0.0209242	-0.0615066	0.00670607	-1.71667	3.75	0.609832	0.779265
201–500	Quadratic	2	0.66	MA	0.916357	1.03256	-0.123069	0.0224555	-0.075562	0.0119666	-2	4	0.494093	0.74572
201–500	Quadratic	2	0.66	PELT	-0.652712	0.690926	-0.103496	0.0283167	-0.131855	0.0318901	-1.9	3.83333	0.514482	0.744985
201–500	Quadratic	2	0.66	PR	0.398343	0.240226	-0.0529131	0.0106982	-0.00668103	0.00408479	-1.73333	3.26667	0.642415	0.808013
201–500	Quadratic	2	1	ARIMA	1.55583	2.93576	0.0787267	0.0167391	0.0835987	0.0100671	-2	4	0.458041	0.717945
201–500	Quadratic	2	1	FLSA	-1.42606	2.15471	-0.36794	0.140585	-0.33705	0.125398	-0.95	1.81667	0.36797	0.721734
201–500	Quadratic	2	1	GAM	-0.00287024	0.0488789	-0.0509861	0.00886021	-0.00470962	0.00237979	-1.86667	3.73333	0.658123	0.787246
201–500	Quadratic	2	1	LOWESS	-0.0876694	0.0447494	-0.118867	0.0177359	-0.0554228	0.00486981	-1.9	3.8	0.586394	0.779028
201–500	Quadratic	2	1	MA	0.724314	0.663998	-0.13362	0.0245398	-0.0803028	0.0124194	-1.98333	3.95	0.504791	0.753422
201–500	Quadratic	2	1	PELT	-0.405647	0.689232	-0.0589379	0.0205497	-0.0882573	0.0209058	-1.63333	2.96667	0.615156	0.801455
201–500	Quadratic	2	1	PR	0.397739	0.252718	-0.0392251	0.00875148	0.00186193	0.0030582	-1.48333	2.65	0.691349	0.843144
201–500	Quadratic	2	2	ARIMA	1.44819	2.40099	0.0717792	0.0115857	0.0798956	0.00832793	-2	4	0.471458	0.729374
201–500	Quadratic	2	2	FLSA	-1.49529	2.36864	-0.379516	0.148822	-0.36036	0.141937	-1.18333	2.45	0.326817	0.674341
201–500	Quadratic	2	2	GAM	0.00592759	0.0303535	-0.0438486	0.0055553	-0.000785565	0.00118557	-1.93333	3.86667	0.652513	0.782058
201–500	Quadratic	2	2	LOWESS	-0.10817	0.0348649	-0.113436	0.0149567	-0.0499851	0.00333759	-1.96667	3.93333	0.579333	0.773758
201–500	Quadratic	2	2	MA	0.511757	0.347153	-0.143824	0.0268501	-0.0848897	0.012869	-1.98333	3.95	0.514773	0.757516
201–500	Quadratic	2	2	PELT	-0.471607	0.327936	-0.0451386	0.015258	-0.0611795	0.0157703	-1.46667	2.46667	0.653782	0.840332
201–500	Quadratic	2	2	PR	0.305437	0.160662	-0.0239574	0.00441627	0.0228735	0.00295985	-1.11667	1.71667	0.7554	0.897818
201–500	Recurrent	0.25	0.33	ARIMA	0.585118	0.980904	0.0271638	0.00305098	0.0146176	0.0131752	-2.41667	6.08333	0.530937	0.639881
201–500	Recurrent	0.25	0.33	FLSA	0.00668418	0.0420737	-0.00425195	0.000159714	-0.0542471	0.00447807	-1.13333	2.73333	0.777745	0.844059
201–500	Recurrent	0.25	0.33	GAM	0.112272	0.0492047	-0.0023121	0.000145748	-0.0234109	0.00244943	-1.83333	3.5	0.671607	0.802967
201–500	Recurrent	0.25	0.33	LOWESS	0.162916	0.0718918	-0.00021304	0.000217763	-0.0183692	0.00207295	-1.73333	3.86667	0.686573	0.78252
201–500	Recurrent	0.25	0.33	MA	3.30743	11.1366	0.0891577	0.00927281	0.0567169	0.00387558	-2	4	0.321472	0.590973
201–500	Recurrent	0.25	0.33	PELT	-0.25	0.0625	-0.0153038	0.000234208	-0.105835	0.0112013	-3	9	0.439241	0.494419
201–500	Recurrent	0.25	0.33	PR	0.0273685	0.0363145	-0.0058437	0.000165955	-0.0362826	0.00355196	-3	9	0.482501	0.498027
201–500	Recurrent	0.25	0.66	ARIMA	0.415808	0.590861	0.0117055	0.00118994	-0.0108784	0.00832341	-2.4	6	0.556211	0.653209
201–500	Recurrent	0.25	0.66	FLSA	-0.0585166	0.0322885	-0.00803584	0.000144546	-0.0694398	0.00576526	-1.33333	3.26667	0.730225	0.813831
201–500	Recurrent	0.25	0.66	GAM	0.149861	0.0665079	-0.0023996	0.000113035	-0.026774	0.00176395	-1.88333	3.65	0.658473	0.794855
201–500	Recurrent	0.25	0.66	LOWESS	0.144301	0.0554482	-0.00278085	0.000136923	-0.0257896	0.00178109	-1.85	3.65	0.66459	0.79502
201–500	Recurrent	0.25	0.66	MA	2.50736	6.43276	0.0494408	0.00287564	0.0256183	0.000978371	-2	4	0.414715	0.671249
201–500	Recurrent	0.25	0.66	PELT	-0.25	0.0625	-0.0153038	0.000234208	-0.105835	0.0112013	-3	9	0.439241	0.494419
201–500	Recurrent	0.25	0.66	PR	-0.00302577	0.0272506	-0.00788155	0.000135208	-0.0438998	0.0036432	-3	9	0.480398	0.498093
201–500	Recurrent	0.25	1	ARIMA	0.279792	0.356051	0.00231821	0.000506581	-0.0304547	0.00645814	-2.4	6	0.563846	0.657791
201–500	Recurrent	0.25	1	FLSA	-0.0825027	0.0372513	-0.00915543	0.000151342	-0.0756996	0.00666663	-1.51667	3.81667	0.695209	0.78275
201–500	Recurrent	0.25	1	GAM	0.17608	0.0691414	-0.00174416	9.1278e-05	-0.0240014	0.00128783	-1.81667	3.45	0.668413	0.806229
201–500	Recurrent	0.25	1	LOWESS	0.151432	0.0531656	-0.0029446	0.0001092	-0.0263316	0.00151476	-1.83333	3.6	0.666261	0.798022
201–500	Recurrent	0.25	1	MA	2.15231	4.76044	0.0356209	0.00151128	0.0128933	0.000399005	-2	4	0.45593	0.699319
201–500	Recurrent	0.25	1	PELT	-0.199444	0.190576	-0.0146238	0.000241116	-0.10561	0.0111564	-2.98333	8.91667	0.445464	0.497659
201–500	Recurrent	0.25	1	PR	-0.0119729	0.0255378	-0.00839992	0.000126288	-0.0461402	0.003731	-3	9	0.478763	0.498076
201–500	Recurrent	0.25	2	ARIMA	0.224694	0.206572	-0.00290492	0.000204929	-0.0369217	0.0045837	-2.3	5.5	0.580996	0.68861
201–500	Recurrent	0.25	2	FLSA	-0.075163	0.0258906	-0.00958579	0.000156689	-0.0738142	0.00610509	-1.1	2.36667	0.761887	0.863405
201–500	Recurrent	0.25	2	GAM	0.217046	0.0723498	-0.000510864	6.19549e-05	-0.0207641	0.000810691	-1.78333	3.35	0.672147	0.812061
201–500	Recurrent	0.25	2	LOWESS	0.17257	0.053918	-0.00257812	8.00519e-05	-0.0260833	0.0012073	-1.83333	3.53333	0.664628	0.801928
201–500	Recurrent	0.25	2	MA	1.74251	3.12275	0.0216928	0.000578175	-0.00117995	0.000177606	-2	4	0.502361	0.726483
201–500	Recurrent	0.25	2	PELT	-0.25	0.0625	-0.0153038	0.000234208	-0.105835	0.0112013	-3	9	0.439241	0.494419
201–500	Recurrent	0.25	2	PR	-0.00991714	0.0209697	-0.00869456	0.000117509	-0.0456178	0.00340277	-3	9	0.478919	0.498269
201–500	Recurrent	0.5	0.33	ARIMA	0.496269	1.32708	-0.0105583	0.00336181	-0.0791949	0.0205107	-2.4	6	0.522436	0.635199
201–500	Recurrent	0.5	0.33	FLSA	-0.20734	0.0976061	-0.0451142	0.00239749	-0.150775	0.0247024	-0.983333	1.78333	0.704247	0.879045
201–500	Recurrent	0.5	0.33	GAM	0.125288	0.137034	-0.0291271	0.00148591	-0.0888885	0.0109091	-1.85	3.61667	0.622765	0.788747
201–500	Recurrent	0.5	0.33	LOWESS	0.214457	0.177942	-0.0203561	0.00164784	-0.0691546	0.00952278	-1.73333	3.53333	0.646424	0.793541
201–500	Recurrent	0.5	0.33	MA	3.08007	9.70814	0.0510647	0.00376884	-0.0355827	0.00197224	-2	4	0.361124	0.616922
201–500	Recurrent	0.5	0.33	PELT	-0.5	0.25	-0.0612154	0.00374733	-0.21167	0.044805	-3	9	0.366884	0.476806
201–500	Recurrent	0.5	0.33	PR	-0.0447384	0.0625335	-0.0386998	0.00191461	-0.0975169	0.0133075	-3	9	0.443417	0.492963
201–500	Recurrent	0.5	0.66	ARIMA	0.730591	2.06309	-0.0042278	0.00458314	-0.068593	0.0180559	-2.28333	5.41667	0.527915	0.656448
201–500	Recurrent	0.5	0.66	FLSA	-0.247976	0.0994152	-0.0488196	0.00256815	-0.159512	0.0268292	-1.2	2.73333	0.662262	0.825857
201–500	Recurrent	0.5	0.66	GAM	0.264314	0.170223	-0.0198734	0.00116078	-0.0730375	0.00830085	-1.76667	4.1	0.635074	0.763536
201–500	Recurrent	0.5	0.66	LOWESS	0.293697	0.181088	-0.0175169	0.00105209	-0.0646032	0.00702716	-1.76667	3.46667	0.637604	0.799084
201–500	Recurrent	0.5	0.66	MA	2.18891	4.94174	0.0109026	0.000483792	-0.0623712	0.00446094	-2	4	0.439848	0.693928
201–500	Recurrent	0.5	0.66	PELT	-0.5	0.25	-0.0612154	0.00374733	-0.21167	0.044805	-3	9	0.366884	0.476806
201–500	Recurrent	0.5	0.66	PR	-0.0406302	0.0387473	-0.0403467	0.00187461	-0.0964762	0.011645	-3	9	0.443172	0.493944
201–500	Recurrent	0.5	1	ARIMA	0.68538	1.78671	-0.00913933	0.0034	-0.0726817	0.0167916	-2.26667	5.33333	0.529923	0.666016
201–500	Recurrent	0.5	1	FLSA	-0.280667	0.1106	-0.0509912	0.00272895	-0.16724	0.02913	-1.36667	3	0.630221	0.809512
201–500	Recurrent	0.5	1	GAM	0.344052	0.196092	-0.0150762	0.000851919	-0.0647494	0.00676645	-1.73333	3.83333	0.639162	0.778909
201–500	Recurrent	0.5	1	LOWESS	0.342	0.183882	-0.0152932	0.000776116	-0.0626492	0.00607696	-1.85	3.61667	0.622543	0.791533
201–500	Recurrent	0.5	1	MA	1.86771	3.62284	-0.00265495	0.000226425	-0.0734921	0.00599818	-2	4	0.466213	0.714506
201–500	Recurrent	0.5	1	PELT	-0.447658	0.362037	-0.0604864	0.00368985	-0.211437	0.044709	-2.98333	8.91667	0.372731	0.480107
201–500	Recurrent	0.5	1	PR	-0.0361473	0.0301537	-0.0406881	0.00184822	-0.0953467	0.0109162	-3	9	0.443652	0.494358
201–500	Recurrent	0.5	2	ARIMA	0.930628	1.97853	0.00483637	0.00402952	-0.039657	0.0120656	-2.1	4.5	0.549473	0.709754
201–500	Recurrent	0.5	2	FLSA	-0.268103	0.102114	-0.0501366	0.00264512	-0.164495	0.028211	-1.28333	2.85	0.645094	0.818462
201–500	Recurrent	0.5	2	GAM	0.413043	0.217627	-0.0103877	0.000567546	-0.0555489	0.00508469	-1.95	3.85	0.606799	0.778874
201–500	Recurrent	0.5	2	LOWESS	0.386181	0.194469	-0.0129557	0.00055617	-0.058909	0.00489147	-1.83333	3.7	0.623996	0.787655
201–500	Recurrent	0.5	2	MA	1.51079	2.3721	-0.0178181	0.000428173	-0.087979	0.00844624	-2	4	0.484909	0.733219
201–500	Recurrent	0.5	2	PELT	-0.5	0.25	-0.0612154	0.00374733	-0.21167	0.044805	-3	9	0.366884	0.476806
201–500	Recurrent	0.5	2	PR	-0.0170042	0.031575	-0.0400172	0.00177207	-0.0939908	0.0102806	-2.98333	8.91667	0.448254	0.499228
201–500	Recurrent	1	0.33	ARIMA	1.80372	4.95742	0.036546	0.0305942	-0.024239	0.025814	-1.9	4.03333	0.492861	0.669043
201–500	Recurrent	1	0.33	FLSA	-0.588867	0.458407	-0.209138	0.0450873	-0.332669	0.115835	-1.08333	2.55	0.486584	0.750823
201–500	Recurrent	1	0.33	GAM	0.582665	0.62137	-0.0660209	0.0141336	-0.109975	0.0262421	-1.53333	3.93333	0.59915	0.749057
201–500	Recurrent	1	0.33	LOWESS	0.567058	0.49228	-0.0815002	0.0116304	-0.122695	0.0229864	-1.71667	3.91667	0.561508	0.755047
201–500	Recurrent	1	0.33	MA	2.45446	6.24347	-0.098807	0.0115501	-0.18772	0.0387997	-2	4	0.332758	0.646523
201–500	Recurrent	1	0.33	PELT	-0.941019	1.09076	-0.240552	0.0589587	-0.418168	0.176429	-2.96667	8.86667	0.21791	0.402329
201–500	Recurrent	1	0.33	PR	0.0808809	0.43801	-0.13356	0.0366396	-0.170856	0.0433515	-2.78333	8.31667	0.402376	0.501357
201–500	Recurrent	1	0.66	ARIMA	1.84647	4.33059	0.0616389	0.0225152	0.0141858	0.0171652	-1.86667	3.83333	0.487433	0.697165
201–500	Recurrent	1	0.66	FLSA	-0.650461	0.495651	-0.215851	0.0474393	-0.339231	0.119334	-1.26667	2.93333	0.454345	0.72805
201–500	Recurrent	1	0.66	GAM	0.660165	0.559274	-0.0459425	0.00804327	-0.0739971	0.0144191	-1.38333	3.55	0.640577	0.780753
201–500	Recurrent	1	0.66	LOWESS	0.625751	0.466741	-0.0720809	0.00820909	-0.105967	0.0162228	-1.73333	3.86667	0.566087	0.763832
201–500	Recurrent	1	0.66	MA	1.71478	3.04954	-0.142265	0.0221762	-0.214391	0.0506538	-2	4	0.366587	0.687373
201–500	Recurrent	1	0.66	PELT	-0.880247	0.948538	-0.233065	0.0560842	-0.411699	0.171398	-2.9	8.53333	0.231721	0.422099
201–500	Recurrent	1	0.66	PR	0.571755	0.838765	-0.0617891	0.0214404	-0.0943394	0.0242847	-1.95	5.15	0.550194	0.67954
201–500	Recurrent	1	1	ARIMA	1.95924	4.25221	0.0742436	0.013478	0.0394911	0.00685855	-1.73333	3.56667	0.477013	0.721494
201–500	Recurrent	1	1	FLSA	-0.627236	0.46666	-0.213797	0.0465079	-0.332335	0.114887	-1.08333	2.48333	0.481377	0.754253
201–500	Recurrent	1	1	GAM	0.662623	0.507506	-0.0387186	0.00572361	-0.059365	0.00980673	-1.21667	3.61667	0.675539	0.781932
201–500	Recurrent	1	1	LOWESS	0.638155	0.456289	-0.0686217	0.00710297	-0.0993305	0.013828	-1.7	3.53333	0.574386	0.784101
201–500	Recurrent	1	1	MA	1.4336	2.16171	-0.157754	0.0268328	-0.226519	0.0562713	-2	4	0.378013	0.696605
201–500	Recurrent	1	1	PELT	-0.522644	0.812819	-0.18212	0.0392999	-0.343764	0.12835	-2.56667	6.9	0.326434	0.526373
201–500	Recurrent	1	1	PR	0.74251	0.948348	-0.0379966	0.0151557	-0.0689303	0.0172507	-1.55	3.65	0.615093	0.764639
201–500	Recurrent	1	2	ARIMA	1.87133	3.7109	0.0667791	0.00926906	0.0409999	0.00490875	-1.33333	3.46667	0.535337	0.738271
201–500	Recurrent	1	2	FLSA	-0.654752	0.488782	-0.216587	0.0476467	-0.338276	0.118325	-1.23333	2.63333	0.4579	0.743613
201–500	Recurrent	1	2	GAM	0.625826	0.430095	-0.0306639	0.00358754	-0.0419754	0.00514537	-1.03333	2.8	0.71975	0.831895
201–500	Recurrent	1	2	LOWESS	0.631012	0.427828	-0.0653989	0.0058141	-0.0901552	0.0106298	-1.61667	3.41667	0.592717	0.793577
201–500	Recurrent	1	2	MA	1.08241	1.26472	-0.174438	0.0322342	-0.242492	0.0636719	-2	4	0.392277	0.704533
201–500	Recurrent	1	2	PELT	-0.0350894	0.219049	-0.0973711	0.0151885	-0.232918	0.063982	-1.91667	4.05	0.522758	0.723822
201–500	Recurrent	1	2	PR	0.851735	0.949716	-0.0214438	0.00890376	-0.0517017	0.0118768	-1.2	2.36667	0.670675	0.839434
201–500	Recurrent	2	0.33	ARIMA	2.53481	6.78227	0.119809	0.0672296	0.0512989	0.0142066	-0.133333	2.9	0.5717	0.690446
201–500	Recurrent	2	0.33	FLSA	-1.2992	1.94757	-0.868413	0.766994	-0.657672	0.454462	-0.95	2.21667	0.133823	0.353548
201–500	Recurrent	2	0.33	GAM	0.98097	1.10891	-0.151173	0.0602099	-0.0616068	0.0152092	-0.133333	1.4	0.739076	0.869556
201–500	Recurrent	2	0.33	LOWESS	0.879552	0.941372	-0.290026	0.106452	-0.147494	0.0312847	-0.65	2.38333	0.57053	0.793628
201–500	Recurrent	2	0.33	MA	1.72594	3.23829	-0.708986	0.538497	-0.480753	0.254681	-2	4	0.119401	0.427593
201–500	Recurrent	2	0.33	PELT	-0.232346	0.740293	-0.329123	0.294488	-0.356312	0.231989	-1.56667	3.7	0.401919	0.546769
201–500	Recurrent	2	0.33	PR	1.64294	3.14779	-0.0584305	0.0795992	-0.055465	0.022514	-0.633333	1.03333	0.640599	0.83802
201–500	Recurrent	2	0.66	ARIMA	2.21024	5.10449	0.0956977	0.0391896	0.0555154	0.00929445	0.566667	2.36667	0.569111	0.757057
201–500	Recurrent	2	0.66	FLSA	-1.33781	1.98628	-0.88185	0.786998	-0.671372	0.466472	-0.966667	1.86667	0.124914	0.353681
201–500	Recurrent	2	0.66	GAM	0.88881	0.868134	-0.116758	0.0334706	-0.0316244	0.00656644	0.1	0.733333	0.789767	0.925592
201–500	Recurrent	2	0.66	LOWESS	0.767264	0.683038	-0.250884	0.0780706	-0.108653	0.017659	0.05	1.95	0.701233	0.84037
201–500	Recurrent	2	0.66	MA	0.976317	1.24031	-0.76551	0.619276	-0.513914	0.287585	-1.83333	3.66667	0.138419	0.42988
201–500	Recurrent	2	0.66	PELT	0.158441	0.179708	-0.0501325	0.0934602	-0.0881148	0.0677697	-0.533333	1.16667	0.810892	0.848018
201–500	Recurrent	2	0.66	PR	1.58056	2.58822	-0.0673442	0.0347566	-0.0462851	0.00901176	-0.316667	0.316667	0.68945	0.91065
201–500	Recurrent	2	1	ARIMA	2.10597	4.59757	0.0870235	0.0309179	0.0568822	0.0079916	0.533333	1.7	0.587193	0.80277
201–500	Recurrent	2	1	FLSA	-1.43413	2.26954	-0.898701	0.815159	-0.697186	0.502095	-1.3	2.93333	0.0929476	0.294751
201–500	Recurrent	2	1	GAM	0.848372	0.777638	-0.103967	0.025739	-0.0217233	0.00454218	0.0166667	0.15	0.819303	0.963294
201–500	Recurrent	2	1	LOWESS	0.707735	0.569582	-0.230491	0.0662101	-0.0912912	0.0130845	0.1	1.2	0.720729	0.890363
201–500	Recurrent	2	1	MA	0.68833	0.81012	-0.773811	0.633166	-0.51634	0.291886	-1.76667	3.53333	0.151839	0.435107
201–500	Recurrent	2	1	PELT	0.242017	0.247618	0.025349	0.0491298	-0.0139003	0.0299267	-0.2	0.5	0.912764	0.926349
201–500	Recurrent	2	1	PR	1.52233	2.39013	-0.0692437	0.0237203	-0.0407797	0.00578883	-0.166667	0.166667	0.718374	0.928695
201–500	Recurrent	2	2	ARIMA	2.036	4.24791	0.0815366	0.0228218	0.0590999	0.00677088	0.516667	1.08333	0.597914	0.843699
201–500	Recurrent	2	2	FLSA	-1.34837	2.07622	-0.873691	0.777427	-0.66848	0.469766	-1.26667	2.86667	0.108788	0.321845
201–500	Recurrent	2	2	GAM	0.809615	0.695716	-0.0887263	0.0183573	-0.0109899	0.00282118	0.05	0.15	0.833691	0.968833
201–500	Recurrent	2	2	LOWESS	0.669032	0.490696	-0.199629	0.0499692	-0.0690198	0.00832757	0.233333	0.933333	0.733914	0.915422
201–500	Recurrent	2	2	MA	0.351127	0.486055	-0.78867	0.655436	-0.525848	0.302302	-1.5	3.5	0.183726	0.429813
201–500	Recurrent	2	2	PELT	0.289467	0.176158	0.0683692	0.0166725	0.031267	0.00386741	0.1	0.1	0.888502	0.982
201–500	Recurrent	2	2	PR	1.4787	2.23228	-0.0836019	0.0191649	-0.0441674	0.00474386	-0.15	0.15	0.717582	0.935141
501–1000	No change	0	0.33	ARIMA	0.388269	0.557333	0.0139296	0.000890037	0.0490096	0.00879116	0.3	0.3	0.861719	0.964056
501–1000	No change	0	0.33	FLSA	0.0880151	0.0206235	0.00317976	6.90479e-05	0.0210946	0.00130253	1.06	2.14	0.799985	0.879713
501–1000	No change	0	0.33	GAM	0.346115	0.157549	0.0116612	0.00023898	0.0802822	0.00812596	1.58	3.82	0.656106	0.779553
501–1000	No change	0	0.33	LOWESS	0.373164	0.170273	0.0132362	0.000292481	0.0846477	0.0086022	1.72	5.08	0.629685	0.709771
501–1000	No change	0	0.33	MA	3.43861	12.2049	0.0721623	0.00541112	0.177661	0.032225	1	1	0.333175	0.674796
501–1000	No change	0	0.33	PELT	0	0	0	0	0	0	0	0	1	1
501–1000	No change	0	0.33	PR	0.244045	0.092455	0.00774223	0.000141422	0.0611052	0.00579726	0	0	0.92138	0.992994
501–1000	No change	0	0.66	ARIMA	0.41828	1.2705	0.0330815	0.0340635	0.0523453	0.0209765	0.3	0.3	0.846111	0.928561
501–1000	No change	0	0.66	FLSA	0.0876424	0.0187556	0.00299717	4.52079e-05	0.0218421	0.00138498	1.26	2.9	0.767259	0.837538
501–1000	No change	0	0.66	GAM	0.273982	0.10173	0.00728122	9.32046e-05	0.0618437	0.00494386	1.44	3	0.696135	0.827956
501–1000	No change	0	0.66	LOWESS	0.294827	0.101203	0.00805309	0.000101719	0.0673927	0.00532562	1.48	3.24	0.684656	0.814444
501–1000	No change	0	0.66	MA	2.68961	7.54461	0.0459601	0.00218159	0.143919	0.0211437	1	1	0.438577	0.776954
501–1000	No change	0	0.66	PELT	0.0260626	0.0339629	0.000117735	6.93078e-07	0.000440018	9.68078e-06	0.04	0.08	0.989523	0.994837
501–1000	No change	0	0.66	PR	0.184531	0.0545813	0.00457079	5.10372e-05	0.0462041	0.00342251	0	0	0.941167	0.995874
501–1000	No change	0	1	ARIMA	0.266833	0.318058	0.00736853	0.000322504	0.0324486	0.00458009	0.26	0.26	0.897428	0.974961
501–1000	No change	0	1	FLSA	0.0800907	0.0159512	0.00236459	2.61802e-05	0.0202616	0.00115935	1.36	3.36	0.752998	0.812236
501–1000	No change	0	1	GAM	0.242059	0.080476	0.00570849	5.71198e-05	0.0541693	0.00383707	1.36	2.44	0.716568	0.860094
501–1000	No change	0	1	LOWESS	0.26386	0.0809368	0.00636451	6.21299e-05	0.0598907	0.00420934	1.56	3.84	0.680171	0.782443
501–1000	No change	0	1	MA	2.42686	6.18045	0.036858	0.00139537	0.129106	0.0170051	1	1	0.47804	0.807587
501–1000	No change	0	1	PELT	0	0	0	0	0	0	0	0	1	1
501–1000	No change	0	1	PR	0.158375	0.0408862	0.00342397	2.92894e-05	0.0396553	0.00256378	0	0	0.949753	0.996913
501–1000	No change	0	2	ARIMA	0.230801	0.217886	0.00452481	9.65531e-05	0.0270054	0.00277057	0.28	0.28	0.903907	0.977548
501–1000	No change	0	2	FLSA	0.0804145	0.0133174	0.00163621	8.54088e-06	0.0197059	0.000748013	1.6	3.92	0.714628	0.781494
501–1000	No change	0	2	GAM	0.201741	0.0569663	0.00403473	2.86879e-05	0.044847	0.0026669	1.34	2.58	0.729672	0.853655
501–1000	No change	0	2	LOWESS	0.221004	0.0569325	0.00443858	2.95537e-05	0.0499002	0.00291162	1.52	3.48	0.696691	0.803659
501–1000	No change	0	2	MA	2.09876	4.67363	0.0276216	0.000782504	0.112644	0.0129273	1.04	1.16	0.521763	0.833048
501–1000	No change	0	2	PELT	0	0	0	0	0	0	0	0	1	1
501–1000	No change	0	2	PR	0.126438	0.0266164	0.00222901	1.28847e-05	0.0316589	0.00166901	0	0	0.96014	0.997992
501–1000	Jump	0.25	0.33	ARIMA	1.84435	12.4462	0.288376	0.456519	0.186707	0.160648	-0.4	0.4	0.483704	0.496385
501–1000	Jump	0.25	0.33	FLSA	-0.107451	0.0288144	-0.00671693	9.22994e-05	-0.022698	0.00161244	0.72	1.88	0.850012	0.893733
501–1000	Jump	0.25	0.33	GAM	0.158485	0.0852551	0.00665003	0.000362841	0.0380941	0.00493615	0.14	0.22	0.926876	0.98167
501–1000	Jump	0.25	0.33	LOWESS	0.164401	0.0747738	0.00597001	0.000300072	0.0359859	0.00413918	0.18	0.26	0.921532	0.980379
501–1000	Jump	0.25	0.33	MA	3.17578	10.4009	0.0566463	0.00359174	0.0997337	0.0109598	0	0	0.492755	0.771214
501–1000	Jump	0.25	0.33	PELT	-0.25	0.0625	-0.0117026	0.000136951	-0.0622426	0.00387415	-1	1	0.76381	0.939993
501–1000	Jump	0.25	0.33	PR	0.127486	0.0760084	0.00521159	0.00035208	0.0322462	0.00477797	-1	1	0.797871	0.938916
501–1000	Jump	0.25	0.66	ARIMA	1.56591	8.45429	0.205127	0.207449	0.159059	0.112396	-0.42	0.42	0.556388	0.658863
501–1000	Jump	0.25	0.66	FLSA	-0.125212	0.0311581	-0.00755673	9.10417e-05	-0.0307327	0.00177884	0.64	1.76	0.855462	0.900213
501–1000	Jump	0.25	0.66	GAM	0.153404	0.0562713	0.00429875	0.000178958	0.0361638	0.00323962	0.18	0.26	0.923714	0.981569
501–1000	Jump	0.25	0.66	LOWESS	0.150539	0.050757	0.00370483	0.000150467	0.0329965	0.00275777	0.3	0.46	0.90737	0.97103
501–1000	Jump	0.25	0.66	MA	2.54116	6.64224	0.036591	0.0015446	0.0759938	0.0065582	0	0	0.597169	0.854421
501–1000	Jump	0.25	0.66	PELT	-0.25	0.0625	-0.0117026	0.000136951	-0.0622426	0.00387415	-1	1	0.76381	0.939993
501–1000	Jump	0.25	0.66	PR	0.12687	0.0501208	0.0030223	0.000176178	0.0320953	0.00315756	-1	1	0.799196	0.940811
501–1000	Jump	0.25	1	ARIMA	1.8195	9.88241	0.248609	0.221215	0.191752	0.136504	-0.46	0.46	0.491153	0.608111
501–1000	Jump	0.25	1	FLSA	-0.138989	0.0306241	-0.00814206	8.7726e-05	-0.0325541	0.0018088	0.8	2.12	0.826828	0.880245
501–1000	Jump	0.25	1	GAM	0.153178	0.0461649	0.00354417	0.000122727	0.0353717	0.00261805	0.2	0.32	0.921489	0.979004
501–1000	Jump	0.25	1	LOWESS	0.149618	0.0421152	0.00303221	0.000101904	0.0320401	0.002236	0.36	0.52	0.898891	0.968339
501–1000	Jump	0.25	1	MA	2.31201	5.49761	0.0297576	0.00102042	0.0658343	0.00491141	0	0	0.636355	0.880019
501–1000	Jump	0.25	1	PELT	-0.25	0.0625	-0.0117026	0.000136951	-0.0622426	0.00387415	-1	1	0.76381	0.939993
501–1000	Jump	0.25	1	PR	0.12776	0.040607	0.00226465	0.000120863	0.0323197	0.00256242	-1	1	0.799373	0.941505
501–1000	Jump	0.25	2	ARIMA	1.91129	8.48179	0.217559	0.137351	0.205251	0.11568	-0.32	0.32	0.498788	0.67638
501–1000	Jump	0.25	2	FLSA	-0.106032	0.0235739	-0.00642528	7.05549e-05	-0.0249895	0.00142859	0.74	1.86	0.84572	0.895091
501–1000	Jump	0.25	2	GAM	0.153391	0.0362245	0.00288539	6.96467e-05	0.0340901	0.00198517	0.26	0.34	0.913105	0.978656
501–1000	Jump	0.25	2	LOWESS	0.139802	0.031426	0.00215611	5.72935e-05	0.0308361	0.00169981	0.48	0.76	0.882161	0.955718
501–1000	Jump	0.25	2	MA	1.98635	4.0642	0.0221673	0.000562444	0.0537198	0.00323781	0	0	0.690124	0.911692
501–1000	Jump	0.25	2	PELT	-0.25	0.0625	-0.0117026	0.000136951	-0.0622426	0.00387415	-1	1	0.76381	0.939993
501–1000	Jump	0.25	2	PR	0.128888	0.0310464	0.00151341	6.86886e-05	0.0326043	0.00196464	-1	1	0.799486	0.9422
501–1000	Jump	0.5	0.33	ARIMA	2.1938	11.7049	0.296668	0.42278	0.20406	0.149883	-0.22	0.22	0.45293	0.53015
501–1000	Jump	0.5	0.33	FLSA	-0.261574	0.0988366	-0.033546	0.00135699	-0.0617876	0.00564519	1.02	2.14	0.74851	0.874534
501–1000	Jump	0.5	0.33	GAM	0.233543	0.125782	0.000697066	0.00086293	0.0438136	0.00518627	0.24	0.36	0.900786	0.972731
501–1000	Jump	0.5	0.33	LOWESS	0.212758	0.0937147	-0.00129584	0.000692429	0.0408525	0.00464998	0.4	0.6	0.879926	0.960647
501–1000	Jump	0.5	0.33	MA	2.98559	9.2951	0.056952	0.00414516	0.0903213	0.00975922	0	0	0.523453	0.795297
501–1000	Jump	0.5	0.33	PELT	-0.5	0.25	-0.0468104	0.00219122	-0.124485	0.0154966	-1	1	0.684242	0.926111
501–1000	Jump	0.5	0.33	PR	0.154995	0.0858034	-0.00575838	0.000894235	0.0394764	0.00541715	-1	1	0.790398	0.938022
501–1000	Jump	0.5	0.66	ARIMA	2.0356	7.48506	0.187457	0.15193	0.193364	0.0819983	-0.04	0.04	0.529695	0.731628
501–1000	Jump	0.5	0.66	FLSA	-0.281847	0.106138	-0.0336891	0.00133105	-0.0663168	0.00625584	0.8	1.96	0.777327	0.883866
501–1000	Jump	0.5	0.66	GAM	0.253562	0.108434	0.000401348	0.000460179	0.0404904	0.00330733	0.38	0.54	0.878692	0.964864
501–1000	Jump	0.5	0.66	LOWESS	0.212476	0.0740346	-0.00238465	0.000378789	0.0391675	0.0032124	0.44	0.52	0.874175	0.966777
501–1000	Jump	0.5	0.66	MA	2.34732	5.75349	0.036754	0.00182042	0.0689608	0.00572866	0	0	0.627122	0.873711
501–1000	Jump	0.5	0.66	PELT	-0.362651	0.290959	-0.0332978	0.00225693	-0.100248	0.0136704	-0.84	0.88	0.742664	0.933317
501–1000	Jump	0.5	0.66	PR	0.15696	0.0587211	-0.00785546	0.000520425	0.0399718	0.00372441	-1	1	0.788787	0.940065
501–1000	Jump	0.5	1	ARIMA	1.42107	2.81128	0.0659533	0.0238185	0.121061	0.0228736	0.22	0.86	0.674076	0.869953
501–1000	Jump	0.5	1	FLSA	-0.276802	0.111529	-0.0324878	0.00136311	-0.0671104	0.00665168	0.64	1.64	0.802494	0.901083
501–1000	Jump	0.5	1	GAM	0.262097	0.101784	0.000597788	0.000319162	0.03885	0.00265269	0.46	0.7	0.866076	0.956746
501–1000	Jump	0.5	1	LOWESS	0.208009	0.0648903	-0.00304583	0.000272202	0.038384	0.00268483	0.46	0.58	0.871724	0.964121
501–1000	Jump	0.5	1	MA	2.05208	4.40886	0.0305057	0.00125118	0.0623161	0.00449551	0	0	0.672456	0.903164
501–1000	Jump	0.5	1	PELT	-0.261979	0.182683	-0.0189188	0.00193285	-0.0702745	0.0107469	-0.64	0.68	0.809228	0.948953
501–1000	Jump	0.5	1	PR	0.15785	0.0492505	-0.00857135	0.000396119	0.0401962	0.00313294	-1	1	0.788182	0.940777
501–1000	Jump	0.5	2	ARIMA	1.19197	1.99475	0.0537516	0.0135467	0.110191	0.0174871	0.36	0.84	0.6966	0.894777
501–1000	Jump	0.5	2	FLSA	-0.300621	0.121005	-0.0345371	0.00140293	-0.0733552	0.00724821	0.4	1.36	0.831287	0.915839
501–1000	Jump	0.5	2	GAM	0.26715	0.0917152	0.000982346	0.000175605	0.0369061	0.0020195	0.44	0.64	0.869623	0.960844
501–1000	Jump	0.5	2	LOWESS	0.208182	0.0577319	-0.00296282	0.000169003	0.0375326	0.00214175	0.66	0.86	0.840742	0.949247
501–1000	Jump	0.5	2	MA	1.72773	3.10147	0.0245255	0.000785558	0.0541345	0.00328032	0	0	0.722851	0.931798
501–1000	Jump	0.5	2	PELT	-0.158573	0.125608	-0.00679082	0.00146288	-0.0411143	0.00765315	-0.46	0.46	0.874067	0.964943
501–1000	Jump	0.5	2	PR	0.180449	0.0485281	-0.00734879	0.000245783	0.0435892	0.00273579	-0.94	0.94	0.793854	0.944487
501–1000	Jump	1	0.33	ARIMA	1.88115	4.00136	0.109536	0.018213	0.172354	0.0328171	0.4	1.16	0.550347	0.825066
501–1000	Jump	1	0.33	FLSA	-0.561527	0.419071	-0.134629	0.0209101	-0.134789	0.0250776	0.74	1.82	0.667296	0.864808
501–1000	Jump	1	0.33	GAM	0.462577	0.307362	-0.0101803	0.00280164	0.0575116	0.00527181	0.44	1	0.827781	0.933129
501–1000	Jump	1	0.33	LOWESS	0.409546	0.262104	-0.0171269	0.00321695	0.0556181	0.00552725	0.5	1.06	0.822903	0.930383
501–1000	Jump	1	0.33	MA	2.57514	6.97348	0.0572085	0.00650078	0.0998481	0.0119128	0	0	0.569861	0.841464
501–1000	Jump	1	0.33	PELT	-0.207519	0.415288	-0.0225673	0.0154949	-0.0607462	0.0221772	-0.32	0.36	0.869164	0.947694
501–1000	Jump	1	0.33	PR	0.330803	0.205456	-0.0343202	0.00552659	0.0572089	0.00652787	-0.7	0.78	0.79209	0.945337
501–1000	Jump	1	0.66	ARIMA	1.47521	2.39073	0.0856304	0.0101111	0.151425	0.0243893	0.48	1.64	0.610026	0.840991
501–1000	Jump	1	0.66	FLSA	-0.503639	0.350415	-0.125005	0.0187001	-0.12228	0.0211759	0.86	1.78	0.667963	0.871979
501–1000	Jump	1	0.66	GAM	0.44944	0.260051	-0.00632587	0.00143875	0.0521226	0.00364319	0.28	0.36	0.858868	0.97109
501–1000	Jump	1	0.66	LOWESS	0.425315	0.249148	-0.0100357	0.00219419	0.0544756	0.00454377	0.64	1.12	0.804154	0.928469
[truncated: 381 more rows]

## Sheet: Log-normal Distribution
Sample_size	Change_pattern	Magnitude_change	SNR	Method	Bias_range	MSE_range	Bias_variance	MSE_variance	Bias_MADM	MSE_MADM	Bias_NCP	MSE_NCP	Bias_area	MSE_area
30–50	No change	0	0.33	ARIMA	0.859555	4.31136	0.229884	0.43246	0.149244	0.135624	0.195238	0.204762	0.828394	0.859098
30–50	No change	0	0.33	FLSA	0.923097	1.71951	0.195244	0.113822	0.238416	0.10073	1.85714	4.65714	0.685116	0.873562
30–50	No change	0	0.33	GAM	1.50142	3.30557	0.291269	0.205112	0.36824	0.196914	1.01429	1.04286	0.633681	0.823516
30–50	No change	0	0.33	LOWESS	1.6146	3.26483	0.303397	0.185123	0.396051	0.200286	1.07143	1.22381	0.61146	0.820979
30–50	No change	0	0.33	MA	2.97853	10.4914	0.3224	0.163501	0.32829	0.124449	0.985714	1.01429	0.619097	0.873002
30–50	No change	0	0.33	PELT	0.706349	5.05933	0.304159	1.45181	0.0749401	0.0515019	0.319048	0.661905	0.852019	0.840006
30–50	No change	0	0.33	PR	1.881	9.11577	0.478794	1.31113	0.392502	0.257636	0.190476	0.4	0.623804	0.707464
30–50	No change	0	0.66	ARIMA	0.830949	3.96343	0.2095	0.381372	0.139096	0.117224	0.214286	0.271429	0.837797	0.876181
30–50	No change	0	0.66	FLSA	0.80796	1.39442	0.155606	0.0710182	0.211764	0.0804155	1.82381	4.55714	0.710627	0.892705
30–50	No change	0	0.66	GAM	1.3165	2.56289	0.226662	0.126883	0.323716	0.153661	1.00952	1.02857	0.672853	0.862199
30–50	No change	0	0.66	LOWESS	1.39224	2.50407	0.235968	0.121005	0.344941	0.156652	1.06667	1.20952	0.655003	0.858976
30–50	No change	0	0.66	MA	2.68967	9.29496	0.265942	0.134038	0.276036	0.091862	1.01429	1.20476	0.661333	0.899314
30–50	No change	0	0.66	PELT	1.27206	8.656	0.589219	2.32216	0.147539	0.108174	0.485714	1.12381	0.732698	0.732263
30–50	No change	0	0.66	PR	1.66426	7.14743	0.406896	0.969913	0.33711	0.193838	0.266667	0.666667	0.66691	0.773765
30–50	No change	0	1	ARIMA	0.842953	3.68735	0.179379	0.237397	0.130526	0.0915467	0.27619	0.533333	0.844574	0.903829
30–50	No change	0	1	FLSA	0.682636	1.03202	0.119569	0.0494752	0.182814	0.0621797	1.68095	4.10952	0.743963	0.91191
30–50	No change	0	1	GAM	1.25215	2.33345	0.206923	0.107278	0.308839	0.141263	1.00476	1.01429	0.686067	0.87327
30–50	No change	0	1	LOWESS	1.31293	2.26827	0.215944	0.10422	0.327886	0.143754	1.0619	1.18571	0.669655	0.870295
30–50	No change	0	1	MA	2.59202	8.90367	0.251596	0.127991	0.260183	0.0838809	0.985714	1.10952	0.67607	0.906978
30–50	No change	0	1	PELT	1.51925	9.51943	0.648039	2.2165	0.185768	0.128145	0.657143	1.4381	0.68646	0.723972
30–50	No change	0	1	PR	1.76771	8.55091	0.456385	1.23619	0.333079	0.200345	0.333333	0.847619	0.655194	0.748835
30–50	No change	0	2	ARIMA	0.76544	3.165	0.139741	0.135326	0.10733	0.0596818	0.233333	0.290476	0.870717	0.938013
30–50	No change	0	2	FLSA	0.892562	1.70011	0.150504	0.0644654	0.208288	0.0691967	1.93333	4.86667	0.705098	0.898413
30–50	No change	0	2	GAM	1.19249	2.07478	0.1843	0.0859128	0.294545	0.126617	1	1	0.699451	0.886227
30–50	No change	0	2	LOWESS	1.23275	2.02339	0.193367	0.0879536	0.310267	0.129051	1.08571	1.27619	0.683643	0.882047
30–50	No change	0	2	MA	2.48332	8.58969	0.232941	0.121477	0.232487	0.069853	0.961905	1.12381	0.698165	0.918231
30–50	No change	0	2	PELT	1.86596	11.4957	0.781842	2.58985	0.230689	0.155738	0.8	1.81905	0.624746	0.676478
30–50	No change	0	2	PR	1.91286	10.294	0.530091	1.64017	0.332055	0.202481	0.395238	0.947619	0.637242	0.718386
30–50	Jump	0.25	0.33	ARIMA	0.310012	1.93174	0.107881	0.119841	0.0464153	0.0664437	-0.842857	0.842857	0.883683	0.930661
30–50	Jump	0.25	0.33	FLSA	0.586817	0.977494	0.145488	0.0683957	0.161793	0.0648739	0.847619	1.98095	0.803694	0.926926
30–50	Jump	0.25	0.33	GAM	1.08719	2.07138	0.224105	0.126165	0.272183	0.125004	0.00952381	0.00952381	0.762742	0.892707
30–50	Jump	0.25	0.33	LOWESS	1.21339	2.0051	0.234571	0.104391	0.299739	0.124128	0.0428571	0.052381	0.73976	0.894641
30–50	Jump	0.25	0.33	MA	2.58496	7.68682	0.256336	0.0931929	0.243511	0.0713336	0.00952381	0.0380952	0.737841	0.929433
30–50	Jump	0.25	0.33	PELT	0.171757	1.86188	0.111307	0.31408	-0.00704181	0.0265905	-0.752381	1	0.914931	0.94447
30–50	Jump	0.25	0.33	PR	1.34249	5.12496	0.305667	0.395342	0.282733	0.152989	-0.861905	0.938095	0.689165	0.842088
30–50	Jump	0.25	0.66	ARIMA	0.303316	1.85346	0.107462	0.152348	0.04385	0.0651203	-0.833333	0.833333	0.886036	0.929403
30–50	Jump	0.25	0.66	FLSA	0.54903	0.796252	0.126471	0.0497994	0.148823	0.053307	0.947619	2.01429	0.809403	0.936906
30–50	Jump	0.25	0.66	GAM	0.879806	1.39755	0.157041	0.061834	0.222039	0.0851073	0.0047619	0.0047619	0.810073	0.928533
30–50	Jump	0.25	0.66	LOWESS	0.986828	1.36307	0.165856	0.0522917	0.243984	0.0843425	0.0190476	0.0190476	0.791834	0.929735
30–50	Jump	0.25	0.66	MA	2.26061	6.4258	0.192899	0.0632283	0.18837	0.0428777	0	0.0857143	0.790066	0.954357
30–50	Jump	0.25	0.66	PELT	0.655615	4.67008	0.325855	0.876583	0.060737	0.0727176	-0.585714	1.0619	0.839146	0.865142
30–50	Jump	0.25	0.66	PR	1.01437	2.94327	0.203212	0.182579	0.224345	0.103631	-0.842857	1.02381	0.74808	0.895457
30–50	Jump	0.25	1	ARIMA	0.177745	1.2265	0.064767	0.0793467	0.0179332	0.0404724	-0.8	1.05714	0.915313	0.95223
30–50	Jump	0.25	1	FLSA	0.468812	0.985486	0.102374	0.0459972	0.119231	0.0415031	0.771429	1.84762	0.84403	0.94731
30–50	Jump	0.25	1	GAM	0.804902	1.19978	0.135569	0.0462227	0.203284	0.072929	0.0047619	0.0047619	0.82721	0.939212
30–50	Jump	0.25	1	LOWESS	0.907522	1.18745	0.14525	0.0412716	0.223113	0.0725671	0.047619	0.0666667	0.808406	0.93934
30–50	Jump	0.25	1	MA	2.14831	6.01813	0.174902	0.0574618	0.168895	0.0355315	-0.0238095	0.0619048	0.806347	0.961065
30–50	Jump	0.25	1	PELT	0.77816	5.06512	0.355575	0.909539	0.074261	0.0741171	-0.5	1.0619	0.828393	0.861313
30–50	Jump	0.25	1	PR	1.02585	3.48831	0.202457	0.223139	0.210041	0.0940816	-0.804762	1.05238	0.758184	0.898828
30–50	Jump	0.25	2	ARIMA	-0.00722982	0.509761	0.0183937	0.00959283	-0.0153816	0.0156626	-0.890476	0.890476	0.924663	0.978674
30–50	Jump	0.25	2	FLSA	0.470462	1.01932	0.104276	0.0431709	0.118022	0.0417236	0.742857	1.89524	0.846129	0.946904
30–50	Jump	0.25	2	GAM	0.720732	0.994638	0.112969	0.0307031	0.181744	0.0603696	0	0	0.8469	0.95025
30–50	Jump	0.25	2	LOWESS	0.813901	0.984471	0.122083	0.0299921	0.200283	0.0597266	0.0333333	0.0619048	0.829625	0.950271
30–50	Jump	0.25	2	MA	1.99614	5.60398	0.157911	0.0558985	0.148158	0.0288507	-0.0428571	0.052381	0.824526	0.966832
30–50	Jump	0.25	2	PELT	1.03712	6.01662	0.432567	0.973196	0.12084	0.0981495	-0.352381	1.07619	0.79088	0.838669
30–50	Jump	0.25	2	PR	1.012	3.71389	0.187494	0.199224	0.189185	0.0769622	-0.77619	1.07143	0.774703	0.912964
30–50	Jump	0.5	0.33	ARIMA	0.169861	2.24617	0.106295	0.153862	0.0119024	0.0805112	-0.814286	0.82381	0.908998	0.917359
30–50	Jump	0.5	0.33	FLSA	0.377456	0.866968	0.131348	0.0731476	0.109131	0.0553849	0.857143	2.07619	0.840605	0.932975
30–50	Jump	0.5	0.33	GAM	0.921403	1.74721	0.208804	0.12601	0.234055	0.105844	0.00952381	0.00952381	0.792111	0.907637
30–50	Jump	0.5	0.33	LOWESS	1.01521	1.59935	0.214019	0.100921	0.251902	0.099354	0.047619	0.0571429	0.776122	0.914153
30–50	Jump	0.5	0.33	MA	2.3094	6.25613	0.224876	0.0807513	0.190256	0.0504345	0.0142857	0.0428571	0.781155	0.947836
30–50	Jump	0.5	0.33	PELT	0.0362153	2.51354	0.14007	0.489903	-0.0421656	0.0493825	-0.72381	1.01905	0.893737	0.913428
30–50	Jump	0.5	0.33	PR	1.05048	3.49372	0.251382	0.261755	0.234165	0.122275	-0.885714	0.92381	0.730546	0.876083
30–50	Jump	0.5	0.66	ARIMA	0.0214442	1.43605	0.0544556	0.0712843	-0.0160249	0.0534698	-0.828571	0.828571	0.920394	0.944776
30–50	Jump	0.5	0.66	FLSA	0.287285	0.618632	0.0899354	0.0405371	0.0876728	0.0414063	0.885714	1.97143	0.861534	0.947114
30–50	Jump	0.5	0.66	GAM	0.680639	1.12567	0.135624	0.0599419	0.176141	0.0693478	0	0	0.846959	0.941054
30–50	Jump	0.5	0.66	LOWESS	0.778512	1.03553	0.142884	0.0504971	0.193478	0.0648693	0.0380952	0.0380952	0.830405	0.944952
30–50	Jump	0.5	0.66	MA	1.95781	4.82829	0.158056	0.0474011	0.139016	0.0301477	0.0047619	0.0619048	0.833216	0.967273
30–50	Jump	0.5	0.66	PELT	0.456953	4.60424	0.319276	0.929939	0.0167842	0.0813416	-0.57619	1.04286	0.870001	0.855359
30–50	Jump	0.5	0.66	PR	0.859244	2.97944	0.204251	0.277782	0.186704	0.0947936	-0.828571	0.990476	0.773306	0.8954
30–50	Jump	0.5	1	ARIMA	-0.0780329	1.05228	0.0243777	0.0387573	-0.0377034	0.0375082	-0.804762	1.00476	0.914549	0.95822
30–50	Jump	0.5	1	FLSA	0.295444	0.935391	0.0961691	0.0782908	0.074764	0.0380128	0.838095	1.9619	0.870576	0.946519
30–50	Jump	0.5	1	GAM	0.59983	0.981271	0.113949	0.0460278	0.15538	0.0590679	0	0	0.865728	0.950112
30–50	Jump	0.5	1	LOWESS	0.687162	0.865363	0.119046	0.0388158	0.170335	0.0542367	0.0238095	0.0238095	0.852037	0.954272
30–50	Jump	0.5	1	MA	1.87659	4.8109	0.141548	0.0452755	0.116592	0.0227601	-0.0047619	0.147619	0.851877	0.972341
30–50	Jump	0.5	1	PELT	0.61455	5.1315	0.359816	0.976581	0.0358971	0.0845737	-0.485714	1.01905	0.853351	0.849332
30–50	Jump	0.5	1	PR	0.798624	2.95294	0.168202	0.170277	0.160209	0.0754805	-0.819048	0.990476	0.797046	0.917733
30–50	Jump	0.5	2	ARIMA	-0.239143	0.623548	-0.0128969	0.0103785	-0.070027	0.0212079	-0.885714	0.885714	0.888825	0.974311
30–50	Jump	0.5	2	FLSA	0.290014	1.34479	0.0854978	0.0833459	0.0565708	0.0340993	0.833333	2.05238	0.883691	0.947816
30–50	Jump	0.5	2	GAM	0.512364	0.806556	0.0900014	0.0314802	0.132848	0.0479756	0.00952381	0.0190476	0.885736	0.959724
30–50	Jump	0.5	2	LOWESS	0.591896	0.706403	0.096348	0.0297604	0.147734	0.0447745	0.052381	0.0714286	0.870751	0.961958
30–50	Jump	0.5	2	MA	1.75187	4.54316	0.126261	0.0442172	0.0971292	0.0184031	-0.0285714	0.0666667	0.868214	0.976771
30–50	Jump	0.5	2	PELT	0.816225	5.80624	0.418643	1.02008	0.0726101	0.0995195	-0.333333	1.15238	0.826383	0.833907
30–50	Jump	0.5	2	PR	0.761096	3.21573	0.163274	0.23073	0.137237	0.0642121	-0.790476	1.00952	0.813625	0.921232
30–50	Jump	1	0.33	ARIMA	-0.0679707	3.4499	0.0722002	0.33323	-0.0500257	0.134157	-0.785714	0.785714	0.898724	0.863375
30–50	Jump	1	0.33	FLSA	-0.0332083	0.629259	0.0291581	0.0735665	0.0283814	0.0509744	0.9	1.91905	0.913513	0.937876
30–50	Jump	1	0.33	GAM	0.664333	1.55673	0.156006	0.154984	0.177526	0.0934496	0	0	0.842623	0.915235
30–50	Jump	1	0.33	LOWESS	0.721556	1.26736	0.150058	0.116797	0.182793	0.0785121	0.0238095	0.0333333	0.837734	0.929415
30–50	Jump	1	0.33	MA	1.81671	4.19	0.106028	0.0496865	0.0948638	0.0286733	0.0142857	0.0428571	0.872842	0.969107
30–50	Jump	1	0.33	PELT	-0.353722	3.00118	0.0675771	0.601823	-0.129272	0.0859886	-0.67619	0.980952	0.853978	0.878283
30–50	Jump	1	0.33	PR	0.868891	3.51465	0.217052	0.312397	0.185923	0.113251	-0.838095	0.914286	0.770526	0.879243
30–50	Jump	1	0.66	ARIMA	-0.158704	2.80743	0.0331098	0.254731	-0.0631884	0.117964	-0.780952	0.780952	0.897482	0.881721
30–50	Jump	1	0.66	FLSA	-0.168155	0.840925	-0.0109896	0.0777472	-0.0169255	0.0429564	0.814286	1.98571	0.926772	0.942752
30–50	Jump	1	0.66	GAM	0.425624	1.08582	0.0761087	0.0845707	0.118212	0.0652413	0	0	0.900233	0.942397
30–50	Jump	1	0.66	LOWESS	0.502376	0.858357	0.0743029	0.0676728	0.125494	0.0538547	0.0190476	0.0190476	0.892999	0.952439
30–50	Jump	1	0.66	MA	1.4296	2.92053	0.0368496	0.0288481	0.0465241	0.0190205	0.00952381	0.047619	0.926356	0.97947
30–50	Jump	1	0.66	PELT	0.129667	4.97177	0.26804	1.05826	-0.0584773	0.112686	-0.519048	1.01429	0.86897	0.823983
30–50	Jump	1	0.66	PR	0.581141	2.48253	0.118969	0.183067	0.123679	0.0810958	-0.814286	0.938095	0.832797	0.91354
30–50	Jump	1	1	ARIMA	-0.296731	2.11265	-0.0194117	0.141353	-0.0876523	0.0949722	-0.771429	0.866667	0.883328	0.907175
30–50	Jump	1	1	FLSA	-0.278375	0.555356	-0.0569839	0.0428034	-0.0466583	0.0354959	0.880952	1.92857	0.89249	0.951829
30–50	Jump	1	1	GAM	0.349216	0.997982	0.0513883	0.0687144	0.0963558	0.0573968	0	0	0.920585	0.949667
30–50	Jump	1	1	LOWESS	0.408601	0.741816	0.048278	0.0564609	0.102276	0.0467872	0.0333333	0.0428571	0.913919	0.958605
30–50	Jump	1	1	MA	1.29588	2.55476	0.0129924	0.0245361	0.0270616	0.0165613	0.0190476	0.133333	0.946096	0.981329
30–50	Jump	1	1	PELT	0.280238	5.12847	0.30245	1.06324	-0.0387768	0.11032	-0.409524	1	0.876683	0.825232
30–50	Jump	1	1	PR	0.47991	2.39703	0.0996683	0.211645	0.101558	0.0751	-0.790476	0.961905	0.853252	0.915815
30–50	Jump	1	2	ARIMA	-0.43317	1.65318	-0.0650538	0.0822588	-0.115394	0.0759812	-0.8	0.819048	0.85276	0.926755
30–50	Jump	1	2	FLSA	-0.224695	0.67855	-0.0413038	0.0484873	-0.0405862	0.0396836	0.890476	2.02381	0.899951	0.947275
30–50	Jump	1	2	GAM	0.270084	0.893497	0.0257065	0.0545751	0.0716643	0.0497312	0.0047619	0.0047619	0.942815	0.956662
30–50	Jump	1	2	LOWESS	0.318073	0.645829	0.0222355	0.0474791	0.0766333	0.0407352	0.047619	0.0857143	0.936415	0.963642
30–50	Jump	1	2	MA	1.1825	2.53513	-0.00330647	0.0266975	0.00668766	0.0154739	-0.0142857	0.119048	0.963985	0.982143
30–50	Jump	1	2	PELT	0.445334	5.63899	0.34258	1.08923	-0.0177845	0.11676	-0.314286	1.06667	0.882589	0.817832
30–50	Jump	1	2	PR	0.458058	2.73699	0.0885297	0.203236	0.0813485	0.0681549	-0.752381	0.92381	0.870167	0.92159
30–50	Jump	2	0.33	ARIMA	-0.0399966	6.8687	0.00172842	1.33116	-0.0487539	0.310787	-0.571429	0.647619	0.929602	0.670397
30–50	Jump	2	0.33	FLSA	-0.769706	1.63204	-0.366092	0.31862	-0.132682	0.0886812	0.909524	2.01429	0.768571	0.889774
30–50	Jump	2	0.33	GAM	0.493306	2.12407	-0.0236274	0.379631	0.134391	0.115897	0	0	0.899039	0.881529
30–50	Jump	2	0.33	LOWESS	0.496068	1.59619	-0.0566781	0.299484	0.123111	0.0908931	0.0047619	0.0047619	0.899046	0.906535
30–50	Jump	2	0.33	MA	0.95428	1.76366	-0.336025	0.215941	-0.0486669	0.0430523	0.0428571	0.128571	0.872776	0.947459
30–50	Jump	2	0.33	PELT	-0.855737	5.05217	-0.178241	1.18721	-0.254673	0.210218	-0.542857	0.942857	0.756442	0.748057
30–50	Jump	2	0.33	PR	0.740377	4.599	0.0987883	0.766855	0.151364	0.15218	-0.719048	0.880952	0.823088	0.818045
30–50	Jump	2	0.66	ARIMA	-0.22609	5.27415	-0.106539	0.866645	-0.072426	0.262949	-0.561905	0.647619	0.889691	0.733594
30–50	Jump	2	0.66	FLSA	-0.883037	1.58427	-0.427216	0.299809	-0.173055	0.0870912	0.914286	2.09524	0.732614	0.891686
30–50	Jump	2	0.66	GAM	0.36688	1.67868	-0.109449	0.280921	0.0885198	0.0879997	0	0	0.91304	0.910012
30–50	Jump	2	0.66	LOWESS	0.342279	1.22765	-0.13881	0.239836	0.0814897	0.0707582	0.0047619	0.0047619	0.91155	0.926458
30–50	Jump	2	0.66	MA	0.593854	1.13379	-0.409998	0.250781	-0.0882914	0.0445192	0.0428571	0.0714286	0.843392	0.944904
30–50	Jump	2	0.66	PELT	-0.441135	5.58902	-0.0133215	1.34298	-0.182929	0.201876	-0.380952	0.971429	0.849004	0.74277
30–50	Jump	2	0.66	PR	0.529973	3.7677	-0.0276161	0.54249	0.107917	0.117912	-0.690476	0.852381	0.869377	0.859631
30–50	Jump	2	1	ARIMA	-0.0960034	5.22339	-0.082681	0.814198	-0.0471054	0.252124	-0.52381	0.6	0.915229	0.744989
30–50	Jump	2	1	FLSA	-1.02447	1.8299	-0.470762	0.333645	-0.20952	0.0928899	0.704762	1.78095	0.714724	0.88734
30–50	Jump	2	1	GAM	0.330484	1.54312	-0.138783	0.256174	0.0708583	0.0787087	0	0	0.918579	0.918959
30–50	Jump	2	1	LOWESS	0.28451	1.11657	-0.169794	0.2261	0.0637916	0.0637215	0.0047619	0.0047619	0.917178	0.932905
30–50	Jump	2	1	MA	0.414261	0.890308	-0.43865	0.264311	-0.103241	0.0459408	0.0666667	0.0857143	0.831751	0.942952
30–50	Jump	2	1	PELT	-0.212197	5.57643	0.0414014	1.31213	-0.160105	0.185706	-0.261905	0.928571	0.870392	0.756169
30–50	Jump	2	1	PR	0.498813	2.93638	-0.0570777	0.41813	0.0960016	0.106361	-0.638095	0.780952	0.87454	0.878481
30–50	Jump	2	2	ARIMA	-0.0119418	4.76924	-0.0704991	0.710759	-0.02546	0.239632	-0.480952	0.547619	0.935573	0.761368
30–50	Jump	2	2	FLSA	-0.896592	1.58021	-0.452617	0.303441	-0.185732	0.0854256	0.980952	2.17143	0.716859	0.892002
30–50	Jump	2	2	GAM	0.294377	1.45926	-0.167197	0.237997	0.0506947	0.0707372	0	0	0.925651	0.926396
30–50	Jump	2	2	LOWESS	0.243729	1.03882	-0.195899	0.214223	0.0441977	0.0575426	0	0	0.924706	0.938582
30–50	Jump	2	2	MA	0.264118	0.844986	-0.452366	0.28206	-0.113818	0.0511346	0.0761905	0.12381	0.825885	0.93743
30–50	Jump	2	2	PELT	0.138796	6.45597	0.127536	1.38799	-0.117123	0.176104	-0.0047619	1.21429	0.897366	0.754496
30–50	Jump	2	2	PR	0.665115	4.02957	-0.0253477	0.510616	0.0885616	0.100249	-0.519048	0.804762	0.889082	0.874925
30–50	Linear	0.25	0.33	ARIMA	0.402265	2.42753	0.119657	0.127372	0.0267838	0.0661137	-1.82857	3.48571	0.823242	0.907077
30–50	Linear	0.25	0.33	FLSA	0.618146	0.938534	0.151845	0.0649965	0.135833	0.0524072	-0.0809524	1.27143	0.864569	0.942749
30–50	Linear	0.25	0.33	GAM	1.0478	1.97046	0.208443	0.113386	0.232264	0.0997774	-0.990476	0.990476	0.7334	0.904704
30–50	Linear	0.25	0.33	LOWESS	1.14109	1.77273	0.208662	0.0813102	0.252665	0.0919591	-0.952381	0.990476	0.722174	0.913155
30–50	Linear	0.25	0.33	MA	2.44821	6.66509	0.219906	0.0618756	0.199972	0.0475076	-0.995238	1.02381	0.71724	0.942511
30–50	Linear	0.25	0.33	PELT	-0.0332622	0.666469	0.0328557	0.042954	-0.0613932	0.0123706	-1.84286	3.62381	0.830331	0.95383
30–50	Linear	0.25	0.33	PR	1.20344	4.2302	0.265254	0.317252	0.236588	0.122644	-1.87143	3.69048	0.666684	0.848423
30–50	Linear	0.25	0.66	ARIMA	0.258696	1.70299	0.0919965	0.126038	0.00647696	0.0554481	-1.83333	3.55714	0.842719	0.915181
30–50	Linear	0.25	0.66	FLSA	0.458003	0.726224	0.103671	0.0364647	0.0920168	0.0332844	-0.0857143	1.37143	0.904253	0.958716
30–50	Linear	0.25	0.66	GAM	0.83609	1.30688	0.145782	0.0558957	0.183742	0.0670213	-0.990476	0.990476	0.776812	0.934409
30–50	Linear	0.25	0.66	LOWESS	0.928479	1.22789	0.147514	0.042711	0.199308	0.0612652	-0.966667	0.97619	0.767073	0.939965
30–50	Linear	0.25	0.66	MA	2.07592	4.95721	0.158475	0.0344929	0.153501	0.0292306	-1	1.01905	0.762351	0.960366
30–50	Linear	0.25	0.66	PELT	0.105287	1.28875	0.074632	0.113646	-0.0387292	0.0227616	-1.75238	3.53333	0.83816	0.940822
30–50	Linear	0.25	0.66	PR	0.917102	2.45446	0.174607	0.14129	0.183239	0.0818261	-1.85714	3.74286	0.717578	0.892286
30–50	Linear	0.25	1	ARIMA	0.245585	1.50838	0.0713251	0.0840454	-0.00228785	0.0419503	-1.79524	3.58571	0.852368	0.928253
30–50	Linear	0.25	1	FLSA	0.454271	0.654026	0.101675	0.0353278	0.0942095	0.033857	-0.0857143	1.24762	0.903426	0.959545
30–50	Linear	0.25	1	GAM	0.767142	1.1321	0.127077	0.0430829	0.166505	0.0577674	-0.990476	0.990476	0.791641	0.942571
30–50	Linear	0.25	1	LOWESS	0.850549	1.06682	0.128782	0.0339282	0.179702	0.0525127	-0.980952	0.980952	0.782551	0.9474
30–50	Linear	0.25	1	MA	1.92825	4.367	0.139335	0.0286766	0.135313	0.0241431	-0.995238	1.04286	0.779795	0.965114
30–50	Linear	0.25	1	PELT	0.364392	2.55442	0.148354	0.221391	0.000322515	0.0418937	-1.6381	3.38095	0.844935	0.918535
30–50	Linear	0.25	1	PR	1.01033	3.53838	0.18633	0.159124	0.173662	0.0743734	-1.79524	3.64286	0.722075	0.896121
30–50	Linear	0.25	2	ARIMA	0.0819241	0.838147	0.0358153	0.0400695	-0.028961	0.0250787	-1.84762	3.6	0.845745	0.94468
30–50	Linear	0.25	2	FLSA	0.454656	0.621403	0.0916149	0.0252337	0.0868013	0.0279556	-0.0285714	1.18095	0.913691	0.965415
30–50	Linear	0.25	2	GAM	0.674098	0.927464	0.106154	0.0296023	0.14451	0.0481226	-1	1	0.809659	0.951046
30–50	Linear	0.25	2	LOWESS	0.77112	0.926966	0.110559	0.025913	0.160225	0.0442224	-0.966667	0.966667	0.799737	0.954578
30–50	Linear	0.25	2	MA	1.73741	3.64446	0.120315	0.0236458	0.119034	0.0208422	-1.00476	1.05238	0.796395	0.968722
30–50	Linear	0.25	2	PELT	0.498322	2.60937	0.186503	0.225164	0.0422177	0.0587377	-1.49524	3.04762	0.821305	0.908771
30–50	Linear	0.25	2	PR	0.98885	3.6819	0.182968	0.172843	0.158134	0.0662044	-1.77619	3.59524	0.732405	0.90134
30–50	Linear	0.5	0.33	ARIMA	0.327247	2.95072	0.138103	0.215506	-0.0222026	0.0913934	-1.78571	3.35714	0.826243	0.882579
30–50	Linear	0.5	0.33	FLSA	0.338554	0.692873	0.123091	0.0615314	0.055925	0.0400434	-0.142857	1.21905	0.921147	0.953076
30–50	Linear	0.5	0.33	GAM	0.873988	1.62419	0.191361	0.108583	0.16864	0.0737805	-0.985714	0.985714	0.775953	0.925077
30–50	Linear	0.5	0.33	LOWESS	0.94833	1.37084	0.18826	0.0740561	0.182234	0.061552	-0.957143	0.966667	0.769047	0.937326
30–50	Linear	0.5	0.33	MA	2.17724	5.38096	0.18996	0.0516819	0.120642	0.0237714	-1	1.01905	0.772347	0.962716
30–50	Linear	0.5	0.33	PELT	-0.274563	0.770559	0.012354	0.0610879	-0.137018	0.0346703	-1.8381	3.61905	0.788705	0.935879
30–50	Linear	0.5	0.33	PR	0.983051	3.26661	0.230257	0.253162	0.166741	0.0901844	-1.87619	3.71429	0.712924	0.877371
30–50	Linear	0.5	0.66	ARIMA	0.0947989	1.70094	0.0592146	0.0652064	-0.0619022	0.0559148	-1.80476	3.41429	0.825702	0.920651
30–50	Linear	0.5	0.66	FLSA	0.180545	0.572804	0.0712642	0.033613	0.00834616	0.0290679	-0.242857	1.38571	0.957911	0.962165
30–50	Linear	0.5	0.66	GAM	0.649043	1.09794	0.128019	0.0581622	0.115582	0.0503911	-0.995238	0.995238	0.822502	0.94702
30–50	Linear	0.5	0.66	LOWESS	0.723222	0.922413	0.125872	0.0404414	0.126425	0.0399851	-0.980952	0.980952	0.816027	0.956567
30–50	Linear	0.5	0.66	MA	1.81045	3.90698	0.130233	0.0277369	0.0768443	0.0139402	-0.995238	1.03333	0.817074	0.973521
30–50	Linear	0.5	0.66	PELT	-0.0441563	1.99499	0.0815794	0.199866	-0.105413	0.0485025	-1.71905	3.5	0.804493	0.914893
30–50	Linear	0.5	0.66	PR	0.71434	2.199	0.150025	0.133256	0.109387	0.0587439	-1.86667	3.74286	0.764466	0.910078
30–50	Linear	0.5	1	ARIMA	0.0947062	1.54463	0.0471921	0.0449009	-0.0643783	0.0482269	-1.73333	3.4381	0.831679	0.927835
30–50	Linear	0.5	1	FLSA	0.181248	0.520925	0.0591455	0.024408	0.00146703	0.0255252	-0.128571	1.29048	0.972619	0.966457
30–50	Linear	0.5	1	GAM	0.565938	0.925125	0.106219	0.0435702	0.0951557	0.0426248	-0.995238	0.995238	0.840326	0.9542
30–50	Linear	0.5	1	LOWESS	0.635439	0.788542	0.105279	0.0332098	0.104427	0.0343348	-0.971429	0.980952	0.835197	0.961553
30–50	Linear	0.5	1	MA	1.66866	3.40772	0.110285	0.0219429	0.0596146	0.0118375	-0.995238	1.0619	0.834044	0.975864
30–50	Linear	0.5	1	PELT	0.146593	2.56199	0.132343	0.251145	-0.0755728	0.0585721	-1.62381	3.35714	0.813991	0.90432
30–50	Linear	0.5	1	PR	0.769928	2.9378	0.153982	0.143805	0.0989736	0.0541718	-1.82857	3.66667	0.77035	0.912507
30–50	Linear	0.5	2	ARIMA	-0.117406	0.872215	0.00547796	0.0172985	-0.0995517	0.0358392	-1.80952	3.49524	0.81574	0.939345
30–50	Linear	0.5	2	FLSA	0.0924985	0.367491	0.0381477	0.0177866	-0.017134	0.0243525	-0.190476	1.30476	0.965577	0.967898
30–50	Linear	0.5	2	GAM	0.465996	0.768539	0.0846406	0.0322788	0.0712693	0.0363912	-1	1	0.86029	0.959918
30–50	Linear	0.5	2	LOWESS	0.554592	0.690649	0.0867579	0.0275473	0.0831469	0.0297617	-0.966667	0.97619	0.853227	0.965608
30–50	Linear	0.5	2	MA	1.47355	2.8139	0.0900664	0.0178335	0.0412677	0.0108521	-0.990476	1.07619	0.85338	0.977462
30–50	Linear	0.5	2	PELT	0.272919	2.49463	0.171077	0.244884	-0.0302051	0.0710802	-1.49048	3.05238	0.836238	0.898349
30–50	Linear	0.5	2	PR	0.818049	3.58033	0.164296	0.163158	0.0854328	0.0520444	-1.75238	3.55238	0.77922	0.912914
30–50	Linear	1	0.33	ARIMA	-0.000900991	3.67062	0.0802858	0.351407	-0.146231	0.154949	-1.75238	3.26667	0.781678	0.826691
30–50	Linear	1	0.33	FLSA	-0.147916	0.554106	0.00530321	0.0639647	-0.0916372	0.0543592	-0.142857	1.19048	0.928702	0.942482
30–50	Linear	1	0.33	GAM	0.657877	1.48815	0.154024	0.145245	0.0759571	0.0654755	-0.980952	0.990476	0.840154	0.928714
30–50	Linear	1	0.33	LOWESS	0.664924	1.09004	0.137474	0.0957446	0.0772928	0.0471549	-0.947619	0.995238	0.844819	0.946633
30–50	Linear	1	0.33	MA	1.73023	3.60274	0.0876419	0.0341093	-0.00737629	0.0183665	-0.985714	1.00476	0.86746	0.970263
30–50	Linear	1	0.33	PELT	-0.635632	1.45144	-0.053295	0.168999	-0.262279	0.118049	-1.7381	3.42381	0.71128	0.867466
30–50	Linear	1	0.33	PR	0.730085	2.94262	0.167638	0.246701	0.0640278	0.0727526	-1.88571	3.72381	0.782869	0.890773
30–50	Linear	1	0.66	ARIMA	-0.0236339	3.35871	0.0551481	0.286093	-0.150649	0.139446	-1.71905	3.18571	0.785918	0.84346
30–50	Linear	1	0.66	FLSA	-0.263874	0.598051	-0.0331651	0.0552613	-0.11989	0.0575331	-0.109524	1.20476	0.904899	0.940566
30–50	Linear	1	0.66	GAM	0.433931	1.09086	0.0804173	0.0865887	0.0237995	0.0527779	-0.985714	0.995238	0.889856	0.943078
30–50	Linear	1	0.66	LOWESS	0.463812	0.780304	0.0689144	0.0608166	0.0243784	0.0369945	-0.971429	0.971429	0.892257	0.95752
30–50	Linear	1	0.66	MA	1.35163	2.40034	0.0264251	0.0194323	-0.0470328	0.0193634	-1	1.02857	0.865402	0.971763
30–50	Linear	1	0.66	PELT	-0.370451	2.34029	0.036396	0.292312	-0.212041	0.126034	-1.6381	3.24762	0.753447	0.853361
30–50	Linear	1	0.66	PR	0.630863	3.171	0.139486	0.253059	0.0270308	0.0708864	-1.79524	3.61429	0.816217	0.892352
30–50	Linear	1	1	ARIMA	-0.0633862	3.49694	0.0630607	0.368817	-0.151051	0.145594	-1.71429	3.21905	0.78355	0.832814
30–50	Linear	1	1	FLSA	-0.248784	0.616738	-0.0413926	0.0468191	-0.13316	0.0571718	-0.0571429	1.26667	0.898826	0.940916
30–50	Linear	1	1	GAM	0.351608	0.977259	0.0552642	0.0720207	0.00265564	0.0494369	-1	1	0.908278	0.946787
30–50	Linear	1	1	LOWESS	0.39483	0.735555	0.0500727	0.0569757	0.00619796	0.037091	-0.985714	0.985714	0.907348	0.957664
30–50	Linear	1	1	MA	1.21963	2.06127	0.00638989	0.0179309	-0.0628292	0.021281	-0.985714	1.03333	0.864442	0.970757
30–50	Linear	1	1	PELT	-0.22119	2.82774	0.0772053	0.34897	-0.189008	0.128223	-1.5381	3.18571	0.767646	0.847752
30–50	Linear	1	1	PR	0.589273	2.84317	0.135239	0.249702	0.019534	0.0737572	-1.74762	3.52857	0.825194	0.891594
30–50	Linear	1	2	ARIMA	-0.153479	3.09797	0.0289971	0.289131	-0.167492	0.130983	-1.73333	3.22857	0.77817	0.849336
30–50	Linear	1	2	FLSA	-0.339204	0.567808	-0.0729371	0.0384701	-0.161917	0.0577863	-0.133333	1.22857	0.867972	0.941463
30–50	Linear	1	2	GAM	0.267658	0.909433	0.0329869	0.0630077	-0.0199989	0.0483955	-0.995238	0.995238	0.905454	0.948373
30–50	Linear	1	2	LOWESS	0.320593	0.704538	0.0312137	0.0546331	-0.0143009	0.0381059	-0.990476	0.990476	0.908191	0.957067
30–50	Linear	1	2	MA	1.05136	1.67105	-0.0158678	0.0173785	-0.0830279	0.0246954	-0.980952	1.05714	0.855131	0.968429
30–50	Linear	1	2	PELT	-0.108563	2.75558	0.104686	0.331091	-0.162917	0.12713	-1.46667	2.97143	0.783454	0.851635
30–50	Linear	1	2	PR	0.639392	3.42366	0.141771	0.249398	0.0109338	0.0773556	-1.66667	3.4	0.832773	0.889474
30–50	Linear	2	0.33	ARIMA	0.628276	9.9671	0.26426	2.17248	-0.138987	0.373371	-1.44762	2.4381	0.75464	0.566683
30–50	Linear	2	0.33	FLSA	-1.01596	1.84167	-0.405802	0.39787	-0.332596	0.205345	-0.138095	1.25238	0.691251	0.80447
30–50	Linear	2	0.33	GAM	0.586299	2.03893	0.0434545	0.3896	-0.0164773	0.101493	-0.971429	0.990476	0.899349	0.883349
30–50	Linear	2	0.33	LOWESS	0.510274	1.50873	0.0069398	0.300461	-0.0238618	0.081904	-0.971429	0.990476	0.90469	0.904918
30–50	Linear	2	0.33	MA	0.953294	1.73666	-0.270343	0.212891	-0.191782	0.0927623	-0.957143	0.985714	0.748204	0.903034
30–50	Linear	2	0.33	PELT	-1.10599	3.99532	-0.267341	0.904014	-0.465974	0.38194	-1.58571	3.04286	0.566142	0.633014
30–50	Linear	2	0.33	PR	0.912724	4.26736	0.164441	0.717721	0.0111249	0.130884	-1.69048	3.34762	0.820285	0.817029
30–50	Linear	2	0.66	ARIMA	0.786617	8.95716	0.305361	1.73242	-0.0817944	0.329842	-1.3381	2.3381	0.77991	0.620732
30–50	Linear	2	0.66	FLSA	-1.04614	1.78095	-0.457599	0.363991	-0.350167	0.19084	-0.138095	1.14762	0.672109	0.818272
30–50	Linear	2	0.66	GAM	0.455399	1.56015	-0.0433121	0.291322	-0.0460837	0.0841261	-0.985714	0.995238	0.884496	0.903844
30–50	Linear	2	0.66	LOWESS	0.400113	1.17118	-0.0671493	0.235713	-0.0508131	0.0681175	-0.97619	0.985714	0.878707	0.920382
30–50	Linear	2	0.66	MA	0.707801	1.34793	-0.306859	0.218938	-0.204734	0.0963703	-0.971429	0.980952	0.738931	0.900362
30–50	Linear	2	0.66	PELT	-0.950834	3.76518	-0.222145	0.811736	-0.41562	0.360637	-1.48571	2.87619	0.607592	0.65429
30–50	Linear	2	0.66	PR	0.704644	3.30075	0.0474442	0.539097	-0.0216718	0.108405	-1.69524	3.37143	0.843775	0.846406
30–50	Linear	2	1	ARIMA	0.838794	8.45964	0.306197	1.54024	-0.0560467	0.301068	-1.3381	2.11905	0.792078	0.6528
30–50	Linear	2	1	FLSA	-1.152	1.91827	-0.493498	0.3512	-0.371755	0.205368	-0.152381	1.28571	0.65118	0.807201
30–50	Linear	2	1	GAM	0.414943	1.39664	-0.0731491	0.26399	-0.0566824	0.0771292	-0.97619	0.995238	0.873751	0.911239
30–50	Linear	2	1	LOWESS	0.360745	1.08163	-0.0935177	0.223372	-0.0619525	0.0638485	-0.97619	0.985714	0.867755	0.924588
30–50	Linear	2	1	MA	0.629518	1.2707	-0.312161	0.237434	-0.206728	0.0994754	-0.933333	0.942857	0.740865	0.897103
30–50	Linear	2	1	PELT	-0.666363	3.91709	-0.12875	0.845237	-0.358105	0.32682	-1.29524	2.61905	0.669788	0.67753
30–50	Linear	2	1	PR	0.697365	3.07374	0.0477167	0.570059	-0.0198598	0.106642	-1.64762	3.31429	0.848087	0.846144
30–50	Linear	2	2	ARIMA	0.774527	7.51803	0.269719	1.3315	-0.0570489	0.28074	-1.29048	2.10952	0.803638	0.67993
30–50	Linear	2	2	FLSA	-1.10486	1.81342	-0.477153	0.349796	-0.359261	0.196678	-0.133333	1.29524	0.662774	0.813742
30–50	Linear	2	2	GAM	0.379903	1.26372	-0.0995529	0.24649	-0.0679882	0.0712804	-0.995238	0.995238	0.861368	0.917039
30–50	Linear	2	2	LOWESS	0.331058	1.02335	-0.115182	0.214197	-0.0722524	0.0600344	-0.97619	0.985714	0.8581	0.928189
30–50	Linear	2	2	MA	0.472662	1.05604	-0.331673	0.241127	-0.21354	0.101105	-0.895238	0.914286	0.739272	0.896092
30–50	Linear	2	2	PELT	-0.530274	3.98332	-0.0920025	0.797238	-0.311254	0.299478	-1.16667	2.45238	0.71207	0.700604
30–50	Linear	2	2	PR	0.702469	2.93901	0.021445	0.504109	-0.0294182	0.0934802	-1.61905	3.24762	0.85025	0.860987
30–50	Quadratic	0.25	0.33	ARIMA	0.591047	3.35276	0.17815	0.253649	0.0823701	0.0972021	-2.79048	7.95238	0.715181	0.836664
30–50	Quadratic	0.25	0.33	FLSA	0.577917	0.946883	0.14229	0.0648714	0.145561	0.0520735	-0.995238	2.18571	0.804493	0.935036
30–50	Quadratic	0.25	0.33	GAM	1.01976	1.93622	0.208424	0.120706	0.248121	0.109064	-1.99524	3.98571	0.6678	0.872343
30–50	Quadratic	0.25	0.33	LOWESS	1.10879	1.74147	0.20547	0.0849452	0.264687	0.100373	-1.9619	3.89524	0.659944	0.882265
30–50	Quadratic	0.25	0.33	MA	2.44066	6.625	0.219774	0.060428	0.218112	0.0537792	-1.99524	4.01429	0.651471	0.912076
30–50	Quadratic	0.25	0.33	PELT	-0.0207961	0.659967	0.0323915	0.0343952	-0.0393557	0.00712239	-2.82381	8.23333	0.775775	0.916774
30–50	Quadratic	0.25	0.33	PR	1.14826	4.05561	0.253626	0.280085	0.245399	0.127897	-2.87143	8.44286	0.608349	0.808698
30–50	Quadratic	0.25	0.66	ARIMA	0.407843	2.23524	0.125945	0.16837	0.0533749	0.0696006	-2.79048	8.00952	0.743553	0.862877
30–50	Quadratic	0.25	0.66	FLSA	0.404719	0.546216	0.100086	0.0339845	0.114029	0.0385446	-1.11905	2.47143	0.826693	0.945438
30–50	Quadratic	0.25	0.66	GAM	0.836393	1.31936	0.151532	0.0606523	0.20766	0.0773563	-1.99524	3.98571	0.702753	0.900664
30–50	Quadratic	0.25	0.66	LOWESS	0.9415	1.27078	0.153805	0.0469232	0.223049	0.0720933	-1.96667	3.9	0.693857	0.906343
30–50	Quadratic	0.25	0.66	MA	2.04997	4.87173	0.16159	0.036573	0.174345	0.0358831	-2.00476	4.0619	0.691873	0.928528
30–50	Quadratic	0.25	0.66	PELT	0.0966567	1.26434	0.0787703	0.114221	-0.01648	0.0209415	-2.74762	8.04286	0.780769	0.901894
30–50	Quadratic	0.25	0.66	PR	0.944646	2.74037	0.183062	0.158043	0.200383	0.0864316	-2.87143	8.47143	0.646248	0.847403
30–50	Quadratic	0.25	1	ARIMA	0.423623	2.35152	0.131291	0.204388	0.0525942	0.072271	-2.78571	7.98571	0.742814	0.858419
30–50	Quadratic	0.25	1	FLSA	0.407127	0.539705	0.0924865	0.0262465	0.107446	0.0325217	-1.12381	2.46667	0.831559	0.950587
30–50	Quadratic	0.25	1	GAM	0.77454	1.1359	0.133999	0.0465477	0.193565	0.0682797	-1.99048	3.97143	0.714915	0.908715
30–50	Quadratic	0.25	1	LOWESS	0.873956	1.10885	0.136502	0.0371557	0.207175	0.0631701	-1.95714	3.87143	0.707267	0.914075
30–50	Quadratic	0.25	1	MA	1.89735	4.27332	0.142416	0.0306405	0.156721	0.0300523	-2	4.04762	0.708012	0.93405
30–50	Quadratic	0.25	1	PELT	0.280216	2.08028	0.132059	0.185605	0.019504	0.0398796	-2.6619	7.76667	0.769973	0.884707
30–50	Quadratic	0.25	1	PR	0.960821	2.89694	0.18352	0.152638	0.193652	0.0813759	-2.83333	8.32857	0.651305	0.852386
30–50	Quadratic	0.25	2	ARIMA	0.0879622	0.981627	0.0449481	0.0393317	-0.00569957	0.0257233	-2.8619	8.36667	0.7857	0.901705
30–50	Quadratic	0.25	2	FLSA	0.397027	0.533357	0.0850871	0.0211823	0.103446	0.0286771	-1.14762	2.51905	0.834	0.953397
30–50	Quadratic	0.25	2	GAM	0.737405	0.983396	0.118468	0.0326331	0.184366	0.0597824	-1.99524	3.98571	0.723133	0.916061
30–50	Quadratic	0.25	2	LOWESS	0.829856	0.996602	0.121634	0.0282222	0.195715	0.0546917	-1.95714	3.88095	0.716949	0.921045
30–50	Quadratic	0.25	2	MA	1.66502	3.40343	0.119087	0.0234355	0.138696	0.025046	-2.00952	4.07619	0.726116	0.93898
30–50	Quadratic	0.25	2	PELT	0.495637	2.69448	0.191844	0.234141	0.0626953	0.0587805	-2.50952	7.17619	0.742186	0.872277
30–50	Quadratic	0.25	2	PR	1.00618	3.32514	0.175101	0.134081	0.185367	0.0672835	-2.80952	8.22857	0.657369	0.864053
30–50	Quadratic	0.5	0.33	ARIMA	0.283516	2.82986	0.141383	0.197151	0.0133616	0.0830174	-2.8	8	0.761401	0.850823
30–50	Quadratic	0.5	0.33	FLSA	0.308773	0.676006	0.116939	0.0507839	0.082837	0.037447	-1.07143	2.40476	0.846023	0.945423
30–50	Quadratic	0.5	0.33	GAM	0.823845	1.59391	0.201111	0.120279	0.200246	0.0884856	-1.99048	3.97143	0.697824	0.887934
30–50	Quadratic	0.5	0.33	LOWESS	0.903349	1.318	0.192056	0.0775664	0.211606	0.0739597	-1.96667	3.9	0.693473	0.902645
30–50	Quadratic	0.5	0.33	MA	2.22495	5.6287	0.201786	0.0532715	0.15782	0.0307922	-2	4.0381	0.689499	0.930399
30–50	Quadratic	0.5	0.33	PELT	-0.249313	0.789029	0.0384475	0.0771172	-0.0815931	0.0298194	-2.8	8.19048	0.750521	0.89767
30–50	Quadratic	0.5	0.33	PR	0.936349	3.83353	0.246306	0.30632	0.194909	0.107973	-2.86667	8.42857	0.637414	0.820939
30–50	Quadratic	0.5	0.66	ARIMA	0.182243	2.34484	0.128406	0.277091	-0.00113222	0.0809458	-2.79048	8.00952	0.772785	0.846807
30–50	Quadratic	0.5	0.66	FLSA	0.140292	0.394603	0.0684843	0.022027	0.0415934	0.0238177	-1.12381	2.58095	0.879765	0.95657
30–50	Quadratic	0.5	0.66	GAM	0.611975	0.997258	0.138408	0.0607938	0.155454	0.0600117	-2	4	0.736651	0.913642
30–50	Quadratic	0.5	0.66	LOWESS	0.715603	0.874417	0.137053	0.0402255	0.167718	0.0496887	-1.97143	3.92381	0.730129	0.923591
30–50	Quadratic	0.5	0.66	MA	1.82839	4.00426	0.142927	0.030824	0.11346	0.0183031	-1.98095	3.99048	0.732879	0.943499
30–50	Quadratic	0.5	0.66	PELT	-0.075842	1.60151	0.083214	0.153611	-0.062495	0.0334654	-2.69524	7.81905	0.761103	0.891687
30–50	Quadratic	0.5	0.66	PR	0.736988	2.46949	0.171438	0.138682	0.149858	0.071019	-2.85238	8.38571	0.677607	0.860622
30–50	Quadratic	0.5	1	ARIMA	0.0952689	1.84942	0.0811607	0.123139	-0.024512	0.0533614	-2.77619	8.08095	0.774367	0.877449
30–50	Quadratic	0.5	1	FLSA	0.153424	0.454551	0.0700125	0.0227829	0.0425064	0.0226779	-1.14762	2.6619	0.877008	0.956576
30–50	Quadratic	0.5	1	GAM	0.562098	0.885512	0.122413	0.046066	0.14264	0.0527179	-2	4	0.747479	0.920241
30–50	Quadratic	0.5	1	LOWESS	0.666038	0.778448	0.122473	0.0331964	0.154697	0.043776	-1.95238	3.90476	0.741947	0.928758
30–50	Quadratic	0.5	1	MA	1.6608	3.40617	0.123178	0.0250436	0.0980812	0.0152651	-2	4.05714	0.747076	0.946238
30–50	Quadratic	0.5	1	PELT	0.0884162	2.28792	0.133675	0.22178	-0.0326672	0.0479613	-2.64286	7.68095	0.768335	0.876834
30–50	Quadratic	0.5	1	PR	0.677129	2.17918	0.156958	0.134395	0.136453	0.0614735	-2.84762	8.3619	0.688295	0.868133
30–50	Quadratic	0.5	2	ARIMA	-0.198738	0.866892	0.0217891	0.0461177	-0.0691589	0.031424	-2.88571	8.42857	0.755495	0.896726
30–50	Quadratic	0.5	2	FLSA	0.0699631	0.308147	0.0527749	0.0144098	0.0302117	0.0202443	-1.19524	2.69048	0.886309	0.958948
30–50	Quadratic	0.5	2	GAM	0.517299	0.753853	0.106666	0.0324741	0.13175	0.0454971	-2	4	0.757211	0.926734
30–50	Quadratic	0.5	2	LOWESS	0.630857	0.707446	0.11017	0.0269591	0.145922	0.038372	-1.97619	3.9381	0.748198	0.933006
30–50	Quadratic	0.5	2	MA	1.44522	2.71944	0.100105	0.0189943	0.0783316	0.0119063	-2.00952	4.07619	0.765932	0.949756
30–50	Quadratic	0.5	2	PELT	0.263558	2.64064	0.179101	0.246228	0.00686951	0.0605407	-2.51429	7.10476	0.776465	0.870807
30–50	Quadratic	0.5	2	PR	0.937246	3.88725	0.217353	0.221585	0.152616	0.0724367	-2.69524	7.80952	0.673183	0.856965
30–50	Quadratic	1	0.33	ARIMA	-0.139918	3.21057	0.110119	0.356068	-0.0858635	0.119884	-2.77619	7.91905	0.737359	0.813993
30–50	Quadratic	1	0.33	FLSA	-0.193906	0.541097	0.0465659	0.0465527	-0.0221929	0.0361187	-1.10476	2.39048	0.895501	0.947013
30–50	Quadratic	1	0.33	GAM	0.482909	1.2855	0.170311	0.135417	0.117883	0.0688644	-1.99524	3.98571	0.752703	0.901388
30–50	Quadratic	1	0.33	LOWESS	0.556406	0.858432	0.151106	0.0713115	0.122237	0.0459664	-1.98571	3.95714	0.753366	0.923706
30–50	Quadratic	1	0.33	MA	1.69838	3.56097	0.11899	0.0273317	0.0380354	0.00765689	-2.01429	4.09048	0.777359	0.951205
30–50	Quadratic	1	0.33	PELT	-0.706507	1.37054	-0.0255009	0.101805	-0.193274	0.0664567	-2.77619	8.09048	0.689756	0.870234
30–50	Quadratic	1	0.33	PR	0.541403	2.63657	0.21556	0.341213	0.111834	0.0976228	-2.81429	8.22381	0.693048	0.828475
30–50	Quadratic	1	0.66	ARIMA	-0.409351	2.07846	0.00733711	0.0978189	-0.139446	0.077824	-2.82857	8.14286	0.722958	0.861339
30–50	Quadratic	1	0.66	FLSA	-0.326381	0.540081	-0.0023437	0.0180454	-0.0620754	0.0282416	-1.19048	2.8	0.873298	0.951461
30–50	Quadratic	1	0.66	GAM	0.277533	0.83769	0.101734	0.0717308	0.0712503	0.0479962	-2	4	0.794888	0.921829
30–50	Quadratic	1	0.66	LOWESS	0.376901	0.559408	0.0920454	0.0378358	0.0772576	0.029574	-1.99524	3.98571	0.791945	0.938404
30–50	Quadratic	1	0.66	MA	1.33553	2.41598	0.0657899	0.0148284	-0.00162017	0.00615433	-1.98571	4.04286	0.817164	0.954953
30–50	Quadratic	1	0.66	PELT	-0.487518	2.37796	0.0475912	0.236008	-0.160459	0.0735934	-2.66667	7.8381	0.713073	0.856389
30–50	Quadratic	1	0.66	PR	0.35804	2.3162	0.137198	0.20015	0.0624867	0.0663943	-2.81429	8.22381	0.736196	0.860835
30–50	Quadratic	1	1	ARIMA	-0.530786	1.71984	-0.0262179	0.0574314	-0.162523	0.0674578	-2.85238	8.2619	0.703826	0.870998
30–50	Quadratic	1	1	FLSA	-0.380246	0.59773	-0.0139079	0.0199031	-0.0826927	0.0300896	-1.25714	2.95238	0.85352	0.948524
30–50	Quadratic	1	1	GAM	0.230837	0.744054	0.0841652	0.0560012	0.0598609	0.0426486	-2	4	0.80552	0.927057
30–50	Quadratic	1	1	LOWESS	0.345669	0.513165	0.0801459	0.0329983	0.0686886	0.0266099	-1.99524	3.98571	0.799577	0.941013
30–50	Quadratic	1	1	MA	1.17902	2.06163	0.0455157	0.0119573	-0.0193882	0.00637277	-1.99524	4.04286	0.814803	0.955399
30–50	Quadratic	1	1	PELT	-0.327075	2.57432	0.0905399	0.273317	-0.133101	0.0791194	-2.57143	7.38095	0.727524	0.853468
30–50	Quadratic	1	1	PR	0.408562	2.3262	0.15784	0.220158	0.0679137	0.0721379	-2.72381	7.89524	0.734278	0.858144
30–50	Quadratic	1	2	ARIMA	-0.669981	1.41083	-0.0567126	0.0336315	-0.185688	0.0600089	-2.85714	8.37143	0.683439	0.877415
30–50	Quadratic	1	2	FLSA	-0.355289	0.574754	-0.0193039	0.0156103	-0.079079	0.0254266	-1.02857	2.25714	0.870061	0.958546
30–50	Quadratic	1	2	GAM	0.215026	0.640128	0.0700567	0.0418999	0.0532982	0.0362878	-2	4	0.812277	0.93293
30–50	Quadratic	1	2	LOWESS	0.300757	0.457835	0.0660904	0.0278915	0.0584751	0.0236021	-1.99048	3.97143	0.809172	0.943813
30–50	Quadratic	1	2	MA	1.00861	1.70038	0.0318023	0.0159514	-0.0319659	0.00941693	-1.97143	4.05714	0.816301	0.953101
30–50	Quadratic	1	2	PELT	-0.232375	2.38825	0.115615	0.247694	-0.0971086	0.0830784	-2.4619	6.91905	0.749402	0.856688
30–50	Quadratic	1	2	PR	0.405613	2.6689	0.152562	0.194717	0.0572382	0.0699603	-2.71429	7.78095	0.741229	0.862183
30–50	Quadratic	2	0.33	ARIMA	-0.794995	5.24158	-0.0952682	0.51569	-0.264016	0.22947	-2.73333	7.67619	0.642639	0.727774
30–50	Quadratic	2	0.33	FLSA	-1.03574	1.63934	-0.213556	0.11647	-0.215933	0.0902094	-1.00476	2.17619	0.740894	0.90205
30–50	Quadratic	2	0.33	GAM	0.0576501	1.53422	0.0580563	0.265499	0.000974136	0.0777651	-2	4	0.845829	0.884884
30–50	Quadratic	2	0.33	LOWESS	0.0797456	0.835867	0.00406243	0.12683	-0.00935267	0.0431719	-1.99048	3.97143	0.853349	0.921442
30–50	Quadratic	2	0.33	MA	0.730996	1.21662	-0.191057	0.0521035	-0.183394	0.0412047	-2	4.06667	0.709668	0.927322
30–50	Quadratic	2	0.33	PELT	-1.48461	3.74761	-0.225051	0.376175	-0.380321	0.21812	-2.67619	7.69524	0.553913	0.745965
30–50	Quadratic	2	0.33	PR	0.13585	3.80169	0.141245	0.660145	-0.00369791	0.13621	-2.68095	7.61429	0.777266	0.783267
30–50	Quadratic	2	0.66	ARIMA	-0.885676	4.50514	-0.155462	0.330702	-0.280214	0.205481	-2.70952	7.60476	0.62359	0.757618
30–50	Quadratic	2	0.66	FLSA	-1.20578	1.85763	-0.274403	0.10936	-0.260215	0.099154	-1.12857	2.48095	0.694955	0.893109
30–50	Quadratic	2	0.66	GAM	-0.031602	1.21079	-0.00194035	0.17577	-0.0287882	0.0633641	-1.98571	3.96667	0.84478	0.90264
30–50	Quadratic	2	0.66	LOWESS	-0.0305317	0.723793	-0.0447434	0.0974579	-0.0383935	0.0392915	-1.98095	3.94286	0.830815	0.926893
30–50	Quadratic	2	0.66	MA	0.407215	0.914351	-0.22639	0.0945885	-0.212672	0.059962	-2.00952	4.08571	0.694295	0.910493
30–50	Quadratic	2	0.66	PELT	-1.15755	4.36229	-0.129122	0.482042	-0.334031	0.207042	-2.53333	7.21905	0.605964	0.749653
30–50	Quadratic	2	0.66	PR	0.00264788	3.09712	0.0754317	0.472138	-0.0275705	0.121361	-2.62381	7.35714	0.786423	0.80945
30–50	Quadratic	2	1	ARIMA	-0.970252	4.23274	-0.191575	0.275926	-0.296597	0.197456	-2.70476	7.59048	0.607986	0.767213
30–50	Quadratic	2	1	FLSA	-1.30608	2.04296	-0.305572	0.117752	-0.286272	0.108728	-1.19524	2.65238	0.669717	0.883761
30–50	Quadratic	2	1	GAM	-0.0591225	1.14145	-0.0203514	0.150998	-0.036973	0.0597138	-1.97619	3.9381	0.836494	0.907481
30–50	Quadratic	2	1	LOWESS	-0.0920679	0.727358	-0.0650275	0.0945338	-0.0518994	0.0399485	-1.98095	3.95238	0.818015	0.926546
30–50	Quadratic	2	1	MA	0.259302	0.822341	-0.246469	0.102758	-0.227961	0.0665466	-1.97619	4.07143	0.687871	0.905277
30–50	Quadratic	2	1	PELT	-1.10281	4.24729	-0.107556	0.47206	-0.313761	0.20233	-2.50476	7.0381	0.62233	0.755051
30–50	Quadratic	2	1	PR	0.133846	3.18903	0.110568	0.473059	-0.00739967	0.120885	-2.48571	6.87619	0.795708	0.813568
30–50	Quadratic	2	2	ARIMA	-1.07956	3.86591	-0.226289	0.226649	-0.310828	0.192404	-2.69524	7.57143	0.593608	0.774547
30–50	Quadratic	2	2	FLSA	-1.34082	2.13366	-0.317585	0.123575	-0.30248	0.115939	-1.15238	2.52381	0.660668	0.878958
30–50	Quadratic	2	2	GAM	-0.0683674	1.14344	-0.0321854	0.131108	-0.0433265	0.0583045	-1.97619	3.9381	0.830376	0.910001
30–50	Quadratic	2	2	LOWESS	-0.121729	0.745687	-0.0784922	0.0902608	-0.0612963	0.0403672	-1.98095	3.94286	0.809581	0.926628
30–50	Quadratic	2	2	MA	0.0819736	0.788841	-0.257164	0.114331	-0.237185	0.0737506	-1.9	3.96667	0.689415	0.900072
30–50	Quadratic	2	2	PELT	-0.976467	3.97815	-0.0877755	0.438333	-0.295801	0.18914	-2.35714	6.52857	0.645465	0.770615
30–50	Quadratic	2	2	PR	0.276758	3.20916	0.12107	0.400711	0.00848255	0.111033	-2.35714	6.28095	0.798832	0.830468
30–50	Recurrent	0.25	0.33	ARIMA	0.5783	3.64301	0.172938	0.284896	0.0378198	0.0943245	-2.80952	8.04762	0.736501	0.835304
30–50	Recurrent	0.25	0.33	FLSA	0.478834	0.709413	0.102824	0.0429061	0.0779915	0.0302558	-1.1	2.50952	0.845868	0.950439
30–50	Recurrent	0.25	0.33	GAM	0.90808	1.66392	0.172482	0.0998245	0.183967	0.079238	-1.99048	3.97143	0.709766	0.896141
30–50	Recurrent	0.25	0.33	LOWESS	1.04102	1.597	0.176383	0.0711611	0.205174	0.0709322	-1.91429	3.79048	0.699879	0.905987
30–50	Recurrent	0.25	0.33	MA	2.50929	6.97889	0.213767	0.0575083	0.176689	0.0361904	-2	4.02857	0.671817	0.924734
30–50	Recurrent	0.25	0.33	PELT	-0.108169	0.348203	0.00745419	0.0167924	-0.0859801	0.0114586	-2.86667	8.46667	0.753242	0.913299
30–50	Recurrent	0.25	0.33	PR	0.964284	2.73549	0.195119	0.189749	0.180311	0.0932515	-2.90476	8.57143	0.651063	0.839493
30–50	Recurrent	0.25	0.66	ARIMA	0.392233	2.34018	0.100511	0.105047	0.00191698	0.0545883	-2.82381	8.11905	0.771993	0.877109
30–50	Recurrent	0.25	0.66	FLSA	0.40417	0.556372	0.0898071	0.0314758	0.0648631	0.0298321	-1.21905	2.81905	0.849768	0.949055
30–50	Recurrent	0.25	0.66	GAM	0.762891	1.15205	0.123555	0.0482291	0.15047	0.0537911	-1.99048	3.98095	0.73951	0.919166
30–50	Recurrent	0.25	0.66	LOWESS	0.874207	1.13706	0.127784	0.0372786	0.165459	0.0484158	-1.94286	3.8381	0.731455	0.925219
30–50	Recurrent	0.25	0.66	MA	2.07983	4.96212	0.150554	0.0308103	0.134509	0.0224635	-2	4.0381	0.714075	0.938974
30–50	Recurrent	0.25	0.66	PELT	0.0211555	1.00988	0.0537869	0.0960561	-0.0604842	0.0227533	-2.79524	8.22381	0.762701	0.900669
30–50	Recurrent	0.25	0.66	PR	0.866928	2.28408	0.155353	0.116159	0.148512	0.0644719	-2.88095	8.48095	0.677074	0.866258
30–50	Recurrent	0.25	1	ARIMA	0.246489	1.60947	0.0601576	0.0479436	-0.024743	0.035059	-2.80952	8.24762	0.773444	0.89485
30–50	Recurrent	0.25	1	FLSA	0.411359	0.537904	0.0836145	0.0248327	0.0624608	0.0247883	-1.10476	2.52381	0.859821	0.955979
30–50	Recurrent	0.25	1	GAM	0.716395	1.01387	0.109875	0.0358075	0.139135	0.0469351	-1.99524	3.98571	0.748776	0.925266
30–50	Recurrent	0.25	1	LOWESS	0.821098	1.00647	0.113132	0.0287528	0.152569	0.0418438	-1.96667	3.9	0.740674	0.930318
30–50	Recurrent	0.25	1	MA	1.89987	4.24366	0.131408	0.0261219	0.120034	0.0194736	-1.99524	4.02381	0.729308	0.942443
30–50	Recurrent	0.25	1	PELT	0.19558	1.58997	0.0909149	0.12965	-0.0369766	0.0276229	-2.67143	7.72857	0.771259	0.898455
30–50	Recurrent	0.25	1	PR	0.876352	2.61907	0.150983	0.124351	0.139915	0.0586058	-2.85238	8.42381	0.683615	0.86991
30–50	Recurrent	0.25	2	ARIMA	-0.00140141	0.675884	0.0154843	0.0129828	-0.0618685	0.0183201	-2.90476	8.52381	0.763148	0.907889
30–50	Recurrent	0.25	2	FLSA	0.431492	0.661843	0.0798581	0.0223516	0.0565793	0.0230244	-1.23333	2.7381	0.854892	0.955444
30–50	Recurrent	0.25	2	GAM	0.668851	0.853241	0.0951809	0.02447	0.12806	0.0400507	-1.99524	3.98571	0.758474	0.93138
30–50	Recurrent	0.25	2	LOWESS	0.773726	0.889674	0.100161	0.0222008	0.140986	0.0355854	-1.9619	3.88571	0.750568	0.935693
30–50	Recurrent	0.25	2	MA	1.69496	3.49117	0.112061	0.0216618	0.104807	0.0169321	-1.99524	4.03333	0.745332	0.94539
30–50	Recurrent	0.25	2	PELT	0.498728	2.72858	0.179253	0.228304	0.0236024	0.0527868	-2.51905	7.07143	0.763216	0.877807
30–50	Recurrent	0.25	2	PR	1.02634	3.82961	0.175249	0.157612	0.139691	0.0548561	-2.76667	8.12857	0.681367	0.87136
30–50	Recurrent	0.5	0.33	ARIMA	0.382629	3.40291	0.139633	0.248175	-0.047386	0.100404	-2.78571	7.9381	0.744386	0.834897
30–50	Recurrent	0.5	0.33	FLSA	0.207518	0.45581	0.0592159	0.0306916	-0.0207199	0.0287731	-1.2381	2.79048	0.884153	0.950269
30–50	Recurrent	0.5	0.33	GAM	0.70848	1.34368	0.135486	0.0865453	0.0957268	0.0545357	-1.99048	3.97143	0.766677	0.91561
30–50	Recurrent	0.5	0.33	LOWESS	0.858627	1.26142	0.142653	0.0585092	0.117162	0.0422354	-1.91905	3.80476	0.755487	0.928327
30–50	Recurrent	0.5	0.33	MA	2.25915	5.76926	0.1737	0.0427612	0.0862967	0.0139275	-2.00476	4.03333	0.730312	0.943517
30–50	Recurrent	0.5	0.33	PELT	-0.334862	0.523445	-0.0270321	0.0296844	-0.179638	0.0401942	-2.86667	8.45714	0.698295	0.89189
30–50	Recurrent	0.5	0.33	PR	0.828106	2.98211	0.168561	0.217519	0.088585	0.0637207	-2.90476	8.55238	0.702153	0.857897
30–50	Recurrent	0.5	0.66	ARIMA	0.200823	2.32184	0.0617939	0.101035	-0.0885393	0.0647589	-2.80476	8.02381	0.742935	0.871082
30–50	Recurrent	0.5	0.66	FLSA	0.226282	0.542627	0.0478824	0.0245166	-0.0269362	0.0241928	-1.1381	2.62381	0.889494	0.955553
30–50	Recurrent	0.5	0.66	GAM	0.548194	0.894949	0.0844208	0.0398028	0.0580596	0.0358655	-1.99524	3.98571	0.799906	0.933253
30–50	Recurrent	0.5	0.66	LOWESS	0.672624	0.82884	0.0888242	0.0285161	0.0730574	0.0265325	-1.98095	3.94286	0.789396	0.941455
30–50	Recurrent	0.5	0.66	MA	1.82492	3.93556	0.11051	0.0206451	0.0451217	0.00780836	-1.99524	4.01429	0.773945	0.951895
30–50	Recurrent	0.5	0.66	PELT	-0.124274	1.59808	0.0395834	0.157949	-0.150404	0.0479953	-2.77619	8.1381	0.720232	0.878352
30–50	Recurrent	0.5	0.66	PR	0.715582	2.79686	0.138265	0.198186	0.0592075	0.0515816	-2.85714	8.42857	0.727668	0.869051
30–50	Recurrent	0.5	1	ARIMA	0.0170291	1.71732	0.0224304	0.0718422	-0.120423	0.0530119	-2.81905	8.2381	0.738016	0.880327
30–50	Recurrent	0.5	1	FLSA	0.13428	0.439223	0.029922	0.0189204	-0.0473843	0.0230171	-1.20952	2.74286	0.879033	0.955916
30–50	Recurrent	0.5	1	GAM	0.49352	0.755198	0.0681153	0.0281971	0.0445315	0.0302624	-1.99048	3.97143	0.81193	0.938552
30–50	Recurrent	0.5	1	LOWESS	0.608006	0.714062	0.0721496	0.0217756	0.0576736	0.0226484	-1.97143	3.92381	0.802955	0.945137
30–50	Recurrent	0.5	1	MA	1.66379	3.38055	0.0886172	0.01547	0.0272557	0.00632407	-1.98571	3.99524	0.791835	0.954165
30–50	Recurrent	0.5	1	PELT	-0.0289158	1.71934	0.0544653	0.146911	-0.133512	0.0460915	-2.6619	7.68095	0.734879	0.884396
30–50	Recurrent	0.5	1	PR	0.73432	3.21565	0.118279	0.129072	0.0427508	0.0364997	-2.85714	8.4	0.739379	0.88465
30–50	Recurrent	0.5	2	ARIMA	-0.258365	0.787702	-0.029896	0.0205138	-0.163298	0.0410604	-2.9	8.52857	0.705286	0.891075
30–50	Recurrent	0.5	2	FLSA	0.169429	0.399432	0.0339309	0.0157106	-0.0329255	0.0226858	-1.16667	2.54762	0.888461	0.958197
30–50	Recurrent	0.5	2	GAM	0.423548	0.623112	0.0518901	0.0191689	0.0281202	0.0261841	-1.99524	3.98571	0.825224	0.942273
30–50	Recurrent	0.5	2	LOWESS	0.541424	0.619216	0.0577475	0.0170881	0.0414822	0.019733	-1.9619	3.89524	0.816603	0.948012
30–50	Recurrent	0.5	2	MA	1.45742	2.78862	0.067292	0.0124831	0.00976766	0.00633039	-1.98095	4.01905	0.810235	0.954819
30–50	Recurrent	0.5	2	PELT	0.218664	2.65415	0.131527	0.236047	-0.0843028	0.0614309	-2.54762	7.23333	0.747156	0.869819
30–50	Recurrent	0.5	2	PR	0.834023	3.90424	0.145911	0.182931	0.0416266	0.0402989	-2.77143	8.12381	0.737874	0.879613
30–50	Recurrent	1	0.33	ARIMA	-0.17844	3.15383	-0.0563994	0.200747	-0.257129	0.157059	-2.80952	8.04762	0.661108	0.79805
30–50	Recurrent	1	0.33	FLSA	-0.170305	0.57641	-0.0926947	0.0504372	-0.196592	0.0719008	-1.11429	2.47619	0.787523	0.919185
30–50	Recurrent	1	0.33	GAM	0.484068	1.25077	0.0224833	0.0979439	-0.0424865	0.0542692	-1.99048	3.97143	0.822839	0.915047
30–50	Recurrent	1	0.33	LOWESS	0.586637	0.994082	0.0121129	0.052681	-0.0413736	0.0345509	-1.97619	3.9381	0.824332	0.933551
30–50	Recurrent	1	0.33	MA	1.76768	3.77576	0.00638641	0.0133934	-0.0912313	0.0167789	-1.99048	3.98095	0.771979	0.946303
30–50	Recurrent	1	0.33	PELT	-0.728647	1.20399	-0.174144	0.094878	-0.357157	0.146808	-2.78571	8.15714	0.582343	0.81371
30–50	Recurrent	1	0.33	PR	0.639319	3.23253	0.0753703	0.301077	-0.0469217	0.0677536	-2.85238	8.35714	0.748553	0.850309
30–50	Recurrent	1	0.66	ARIMA	-0.333226	2.24763	-0.125649	0.0935971	-0.289728	0.138371	-2.81429	8.07143	0.629317	0.819365
30–50	Recurrent	1	0.66	FLSA	-0.314062	0.488605	-0.137832	0.0387848	-0.229908	0.0774289	-1.28095	2.88095	0.747216	0.912556
30–50	Recurrent	1	0.66	GAM	0.273147	0.797713	-0.0466565	0.0507413	-0.0898232	0.0472255	-2	4	0.79662	0.924028
30–50	Recurrent	1	0.66	LOWESS	0.413164	0.704136	-0.0435148	0.0348302	-0.0856494	0.0346193	-1.98571	3.95714	0.797371	0.93501
30–50	Recurrent	1	0.66	MA	1.37023	2.49597	-0.0559382	0.0128485	-0.132537	0.0252182	-1.98571	4.01429	0.749286	0.941196
30–50	Recurrent	1	0.66	PELT	-0.51943	2.13903	-0.104777	0.220572	-0.328832	0.146397	-2.72381	7.93333	0.61526	0.806082
30–50	Recurrent	1	0.66	PR	0.520784	3.04104	0.027256	0.222948	-0.0782421	0.0618464	-2.8	8.2	0.74897	0.861772
30–50	Recurrent	1	1	ARIMA	-0.394428	2.19201	-0.136808	0.113101	-0.300499	0.1397	-2.82381	8.11905	0.6204	0.816733
30–50	Recurrent	1	1	FLSA	-0.320159	0.507219	-0.142213	0.0390072	-0.234139	0.0789783	-1.22857	2.80952	0.747041	0.911974
30–50	Recurrent	1	1	GAM	0.194246	0.689403	-0.0690839	0.0427466	-0.109826	0.0473412	-1.99524	3.98571	0.783491	0.92479
30–50	Recurrent	1	1	LOWESS	0.346075	0.632079	-0.061342	0.0328544	-0.102575	0.0370272	-1.99048	3.97143	0.785916	0.933336
30–50	Recurrent	1	1	MA	1.2027	2.06803	-0.0778752	0.0149047	-0.147896	0.0297711	-1.97619	4.00476	0.741156	0.938222
30–50	Recurrent	1	1	PELT	-0.422635	2.16303	-0.0899902	0.203525	-0.311718	0.136794	-2.60952	7.4381	0.634515	0.817981
30–50	Recurrent	1	1	PR	0.500509	3.11992	0.0137506	0.200058	-0.0945158	0.0591251	-2.76667	8.1	0.746205	0.866165
30–50	Recurrent	1	2	ARIMA	-0.52814	1.51921	-0.174298	0.0639575	-0.321598	0.13622	-2.8381	8.19048	0.600355	0.822751
30–50	Recurrent	1	2	FLSA	-0.3525	0.572374	-0.156664	0.0409697	-0.255645	0.0864458	-1.30952	3.07143	0.727146	0.903971
30–50	Recurrent	1	2	GAM	0.110895	0.602831	-0.0913856	0.03785	-0.132079	0.0496958	-1.99524	3.98571	0.769095	0.923518
30–50	Recurrent	1	2	LOWESS	0.251627	0.544984	-0.0833958	0.0332771	-0.124694	0.0409048	-2	4	0.771243	0.930286
30–50	Recurrent	1	2	MA	1.05368	1.74388	-0.0970862	0.017507	-0.162817	0.034918	-1.95238	3.93333	0.734293	0.935202
30–50	Recurrent	1	2	PELT	-0.170397	3.0329	-0.0207835	0.275317	-0.277295	0.134533	-2.5	6.99524	0.675556	0.817226
30–50	Recurrent	1	2	PR	0.403102	2.98019	-0.00387644	0.19818	-0.119164	0.06105	-2.75714	8.0619	0.738461	0.865432
30–50	Recurrent	2	0.33	ARIMA	-0.469091	6.46304	-0.527427	1.16225	-0.523707	0.474494	-2.68571	7.4381	0.461149	0.528632
30–50	Recurrent	2	0.33	FLSA	-0.923216	1.69763	-0.717365	0.626777	-0.52063	0.322137	-1.07143	2.40476	0.50074	0.697432
30–50	Recurrent	2	0.33	GAM	0.333192	1.94322	-0.399008	0.47732	-0.250843	0.148406	-1.99048	3.98095	0.646033	0.818762
30–50	Recurrent	2	0.33	LOWESS	0.387166	1.4245	-0.452716	0.374909	-0.28215	0.134788	-1.97143	3.93333	0.621372	0.83658
30–50	Recurrent	2	0.33	MA	0.987159	1.85504	-0.637498	0.522013	-0.413876	0.195001	-1.99524	4.00476	0.516829	0.782563
30–50	Recurrent	2	0.33	PELT	-1.45878	3.61115	-0.768688	0.890867	-0.701685	0.545284	-2.69524	7.70476	0.338143	0.496561
30–50	Recurrent	2	0.33	PR	0.524029	3.90091	-0.293312	0.807737	-0.232344	0.16791	-2.69524	7.80952	0.629272	0.750185
30–50	Recurrent	2	0.66	ARIMA	-0.389518	5.57964	-0.566854	0.947269	-0.512924	0.42828	-2.61429	7.08095	0.464782	0.572699
30–50	Recurrent	2	0.66	FLSA	-1.0779	1.69643	-0.787671	0.668172	-0.553924	0.342766	-1.05714	2.27619	0.472734	0.681192
30–50	Recurrent	2	0.66	GAM	0.197412	1.645	-0.474555	0.45117	-0.289987	0.160531	-1.9619	3.92381	0.617982	0.812706
30–50	Recurrent	2	0.66	LOWESS	0.255467	1.23871	-0.519034	0.398013	-0.318172	0.150983	-1.94286	3.88571	0.596833	0.823933
30–50	Recurrent	2	0.66	MA	0.629851	1.34267	-0.700597	0.612001	-0.449992	0.224237	-1.99048	3.98095	0.497682	0.756721
30–50	Recurrent	2	0.66	PELT	-1.26728	3.67187	-0.719284	0.848947	-0.674107	0.515272	-2.61429	7.42381	0.361369	0.519822
30–50	Recurrent	2	0.66	PR	0.358277	3.50881	-0.368855	0.746629	-0.268385	0.177422	-2.63333	7.63333	0.605563	0.749758
30–50	Recurrent	2	1	ARIMA	-0.31856	5.25112	-0.552861	0.841669	-0.492866	0.405872	-2.58571	6.9381	0.478164	0.594383
30–50	Recurrent	2	1	FLSA	-1.11843	1.86612	-0.79505	0.691666	-0.569082	0.360058	-1.17619	2.58571	0.458715	0.665354
30–50	Recurrent	2	1	GAM	0.132338	1.53984	-0.507868	0.452094	-0.309009	0.167573	-1.98095	3.9619	0.603304	0.807431
30–50	Recurrent	2	1	LOWESS	0.236703	1.26504	-0.533158	0.408427	-0.329758	0.158331	-1.9619	3.91429	0.588284	0.817695
30–50	Recurrent	2	1	MA	0.530376	1.38823	-0.706401	0.665238	-0.458247	0.236168	-1.96667	3.94762	0.496115	0.745115
30–50	Recurrent	2	1	PELT	-1.11615	3.36164	-0.681971	0.77409	-0.643549	0.478553	-2.48571	6.90476	0.386263	0.551192
30–50	Recurrent	2	1	PR	0.423346	3.8152	-0.377697	0.658196	-0.271541	0.176029	-2.55714	7.36667	0.605669	0.758462
30–50	Recurrent	2	2	ARIMA	-0.198741	4.8381	-0.544482	0.809359	-0.470825	0.373209	-2.5	6.56667	0.49537	0.620806
30–50	Recurrent	2	2	FLSA	-1.16919	1.9012	-0.820192	0.718825	-0.585012	0.37541	-1.05238	2.27143	0.452273	0.654963
30–50	Recurrent	2	2	GAM	0.101161	1.49509	-0.524151	0.446857	-0.321314	0.173996	-1.98095	3.9619	0.595304	0.803258
30–50	Recurrent	2	2	LOWESS	0.191471	1.21664	-0.557855	0.425998	-0.345864	0.16744	-1.97143	3.95238	0.576919	0.809724
30–50	Recurrent	2	2	MA	0.351735	1.02815	-0.746778	0.634651	-0.477853	0.247952	-1.93333	3.9619	0.486171	0.739077
30–50	Recurrent	2	2	PELT	-0.902295	3.95603	-0.634831	0.800903	-0.626432	0.462888	-2.35714	6.38571	0.408512	0.562812
30–50	Recurrent	2	2	PR	0.437978	3.75482	-0.376968	0.621153	-0.272365	0.184493	-2.45714	7.00952	0.610866	0.758057
51–100	No change	0	0.33	ARIMA	1.79798	9.32859	0.299608	0.342575	0.222264	0.145108	0.38	0.38	0.740413	0.851462
51–100	No change	0	0.33	FLSA	0.777242	1.31098	0.119078	0.0355256	0.199401	0.0663552	1.77	4.43	0.727819	0.906818
51–100	No change	0	0.33	GAM	1.72058	4.18131	0.34485	0.276719	0.42162	0.237232	1.16	1.5	0.584867	0.784449
51–100	No change	0	0.33	LOWESS	1.57328	3.27728	0.292724	0.168347	0.41219	0.206353	1.27	1.83	0.595634	0.81292
51–100	No change	0	0.33	MA	3.0904	10.4959	0.205335	0.0556014	0.275618	0.0801203	1	1	0.663371	0.914254
51–100	No change	0	0.33	PELT	3.661	31.2152	1.30967	4.43169	0.256614	0.148534	0.98	2.06	0.480964	0.538369
51–100	No change	0	0.33	PR	2.9709	21.2924	0.845615	2.49154	0.435679	0.305382	0.66	1.68	0.501596	0.585022
51–100	No change	0	0.66	ARIMA	2.26316	11.0799	0.325349	0.294787	0.25038	0.138298	0.5	0.5	0.70271	0.856977
51–100	No change	0	0.66	FLSA	0.718939	0.90259	0.101517	0.0203152	0.191682	0.0570622	1.86	4.7	0.731076	0.912883
51–100	No change	0	0.66	GAM	1.51657	3.18209	0.26651	0.169599	0.372902	0.184366	1.25	1.79	0.622796	0.829621
51–100	No change	0	0.66	LOWESS	1.38168	2.51073	0.227715	0.104884	0.367668	0.163229	1.33	2.09	0.630676	0.848157
51–100	No change	0	0.66	MA	2.58521	7.31778	0.134246	0.0240851	0.221287	0.051294	1	1	0.717153	0.941961
51–100	No change	0	0.66	PELT	6.84892	54.8402	2.18892	6.34443	0.419515	0.214464	1.98	4.5	0.214991	0.355986
51–100	No change	0	0.66	PR	2.92954	20.1009	0.788503	2.09307	0.42277	0.28458	0.72	1.76	0.514108	0.621911
51–100	No change	0	1	ARIMA	2.27397	10.8825	0.304509	0.248769	0.232873	0.115865	0.51	0.51	0.715295	0.877104
51–100	No change	0	1	FLSA	0.655206	0.74067	0.0855062	0.0152349	0.177566	0.049157	1.85	4.63	0.743584	0.91985
51–100	No change	0	1	GAM	1.43285	2.78931	0.238361	0.132403	0.355961	0.167062	1.31	2.07	0.635108	0.843268
51–100	No change	0	1	LOWESS	1.30748	2.20727	0.203154	0.0827429	0.349209	0.146867	1.23	1.75	0.651423	0.864978
51–100	No change	0	1	MA	2.41844	6.42268	0.113767	0.0186599	0.20137	0.0429215	1	1	0.735811	0.94972
51–100	No change	0	1	PELT	7.29817	56.6923	2.27773	6.35592	0.427214	0.205336	2.1	4.64	0.193526	0.356558
51–100	No change	0	1	PR	3.40099	25.293	0.90655	2.32608	0.403459	0.259356	0.94	2.48	0.486777	0.613784
51–100	No change	0	2	ARIMA	2.35467	11.1525	0.312355	0.237953	0.226432	0.104804	0.52	0.52	0.715112	0.885782
51–100	No change	0	2	FLSA	0.673873	0.950648	0.0829068	0.0158539	0.168807	0.0463863	1.82	4.68	0.750165	0.921175
51–100	No change	0	2	GAM	1.34834	2.3693	0.210237	0.0957618	0.339619	0.149835	1.37	2.35	0.647163	0.85686
51–100	No change	0	2	LOWESS	1.21181	1.83672	0.175261	0.0608996	0.327006	0.128702	1.27	1.87	0.668116	0.879579
51–100	No change	0	2	MA	2.15616	5.0254	0.0835287	0.00782951	0.17215	0.0301262	0.99	0.99	0.764488	0.961904
51–100	No change	0	2	PELT	7.15153	54.6402	2.18455	5.70891	0.442496	0.222182	2.24	5.32	0.197272	0.386046
51–100	No change	0	2	PR	3.97105	27.063	1.06704	2.41508	0.464737	0.310356	1.35	3.47	0.40911	0.569409
51–100	Jump	0.25	0.33	ARIMA	0.380452	2.52179	0.0802828	0.0808317	0.022616	0.0422422	-0.84	0.84	0.901738	0.951252
51–100	Jump	0.25	0.33	FLSA	0.471302	0.803188	0.0922686	0.0285091	0.109503	0.0384881	0.92	2.14	0.842063	0.948536
51–100	Jump	0.25	0.33	GAM	0.800596	1.34514	0.157786	0.073349	0.209891	0.0930506	0.13	0.15	0.811763	0.920462
51–100	Jump	0.25	0.33	LOWESS	0.837726	1.24699	0.146238	0.0556477	0.209401	0.0801634	0.17	0.33	0.810929	0.930164
51–100	Jump	0.25	0.33	MA	3.11958	10.588	0.198588	0.0454676	0.198944	0.0420492	0	0	0.761768	0.952424
51–100	Jump	0.25	0.33	PELT	1.02303	8.38512	0.389205	0.968322	0.0543854	0.0605324	-0.57	1.05	0.822291	0.863205
51–100	Jump	0.25	0.33	PR	1.01581	4.41049	0.239233	0.393684	0.195117	0.101559	-0.83	1.01	0.758387	0.880286
51–100	Jump	0.25	0.66	ARIMA	0.180456	1.64301	0.0402807	0.031068	-0.00726782	0.0228176	-0.88	0.88	0.921215	0.970407
51–100	Jump	0.25	0.66	FLSA	0.318552	0.497767	0.0527817	0.0139233	0.0673439	0.0214828	1.09	2.27	0.866623	0.961607
51–100	Jump	0.25	0.66	GAM	0.597901	0.866729	0.0994518	0.0318025	0.152559	0.0559162	0.11	0.13	0.863485	0.952591
51–100	Jump	0.25	0.66	LOWESS	0.643925	0.818001	0.0937654	0.0242901	0.155287	0.0485134	0.12	0.3	0.861184	0.957389
51–100	Jump	0.25	0.66	MA	2.70283	7.96796	0.135147	0.0210623	0.148043	0.0233404	-0.01	0.01	0.813351	0.971442
51–100	Jump	0.25	0.66	PELT	2.78525	19.05	0.789376	1.54228	0.149202	0.0888172	0.04	1.32	0.688799	0.789071
51–100	Jump	0.25	0.66	PR	0.786285	3.69157	0.160809	0.243099	0.139719	0.0656431	-0.84	1.02	0.809031	0.918634
51–100	Jump	0.25	1	ARIMA	0.145531	1.62861	0.0294581	0.0207854	-0.0171062	0.0167344	-0.89	0.89	0.918002	0.975751
51–100	Jump	0.25	1	FLSA	0.218587	0.31477	0.0367508	0.00827272	0.053948	0.0174121	1.03	2.13	0.883967	0.966557
51–100	Jump	0.25	1	GAM	0.516685	0.696765	0.0777641	0.0202479	0.129541	0.0427898	0.07	0.07	0.886252	0.964223
51–100	Jump	0.25	1	LOWESS	0.565171	0.675685	0.0761203	0.0166799	0.134182	0.0384773	0.1	0.12	0.880651	0.967381
51–100	Jump	0.25	1	MA	2.55165	7.10187	0.114275	0.0152268	0.127439	0.0172884	-0.01	0.01	0.833453	0.977498
51–100	Jump	0.25	1	PELT	2.96018	19.3661	0.812554	1.49086	0.150154	0.0809252	0.12	1.38	0.675761	0.797219
51–100	Jump	0.25	1	PR	1.09066	6.38278	0.235706	0.39139	0.142431	0.0680194	-0.67	1.21	0.796424	0.90133
51–100	Jump	0.25	2	ARIMA	-0.0276286	0.852685	0.0109614	0.0098184	-0.033719	0.0113209	-0.93	0.93	0.91241	0.981222
51–100	Jump	0.25	2	FLSA	0.193431	0.346193	0.0284626	0.00662722	0.0375556	0.0112046	0.88	1.88	0.905895	0.97357
51–100	Jump	0.25	2	GAM	0.42181	0.519708	0.0546103	0.0105176	0.103125	0.0293021	0.02	0.02	0.912639	0.975942
51–100	Jump	0.25	2	LOWESS	0.468243	0.489132	0.0545286	0.00887735	0.108253	0.0268634	0.16	0.26	0.899335	0.975838
51–100	Jump	0.25	2	MA	2.35022	6.03767	0.0931056	0.0102372	0.104272	0.0115327	-0.03	0.03	0.85536	0.98331
51–100	Jump	0.25	2	PELT	3.08288	19.5388	0.8227	1.41531	0.159484	0.0782406	0.23	1.47	0.660344	0.803549
51–100	Jump	0.25	2	PR	0.904778	5.37654	0.17317	0.264582	0.098268	0.0391267	-0.7	1.24	0.836143	0.933014
51–100	Jump	0.5	0.33	ARIMA	0.252128	2.92028	0.081662	0.121294	-0.0116578	0.0632273	-0.81	0.83	0.912835	0.931999
51–100	Jump	0.5	0.33	FLSA	0.154185	0.537532	0.0425362	0.0195654	0.032417	0.0225243	0.9	2.12	0.905434	0.961684
51–100	Jump	0.5	0.33	GAM	0.685306	1.32693	0.15724	0.0932963	0.179547	0.088994	0.11	0.11	0.833966	0.922452
51–100	Jump	0.5	0.33	LOWESS	0.711957	1.17306	0.138459	0.0657008	0.175838	0.070121	0.12	0.12	0.838514	0.938952
51–100	Jump	0.5	0.33	MA	2.80133	8.68418	0.160462	0.0306616	0.145493	0.0240434	0	0	0.808382	0.969455
51–100	Jump	0.5	0.33	PELT	0.949583	9.00904	0.425617	1.11883	0.0246219	0.0819064	-0.52	1.04	0.835819	0.836675
51–100	Jump	0.5	0.33	PR	1.08063	5.8938	0.284741	0.522908	0.183072	0.113472	-0.76	1.06	0.759207	0.860287
51–100	Jump	0.5	0.66	ARIMA	0.142249	2.19469	0.0338216	0.0414528	-0.0366655	0.0353289	-0.82	0.82	0.910563	0.960029
51–100	Jump	0.5	0.66	FLSA	0.143115	0.599244	0.0235534	0.0109047	0.0087256	0.0145898	1.16	2.5	0.905521	0.964841
51–100	Jump	0.5	0.66	GAM	0.486607	0.897909	0.0940875	0.0428897	0.123203	0.0547437	0.07	0.07	0.887599	0.953139
51–100	Jump	0.5	0.66	LOWESS	0.518127	0.798019	0.0826449	0.0302576	0.120829	0.0427187	0.15	0.17	0.885453	0.962526
51–100	Jump	0.5	0.66	MA	2.46923	6.75055	0.102893	0.013295	0.095632	0.010926	-0.01	0.01	0.856989	0.982918
51–100	Jump	0.5	0.66	PELT	2.6223	18.7188	0.791407	1.61422	0.10339	0.0875146	0.04	1.32	0.715342	0.785099
51–100	Jump	0.5	0.66	PR	0.69714	2.96182	0.172361	0.229542	0.127351	0.076433	-0.8	0.98	0.818303	0.912725
51–100	Jump	0.5	1	ARIMA	0.0662842	2.06177	0.0150323	0.0263248	-0.0533374	0.0273933	-0.84	0.84	0.9053	0.967186
51–100	Jump	0.5	1	FLSA	-0.0379613	0.263029	0.00188185	0.00723298	-0.0149419	0.0145588	0.9	1.86	0.927115	0.971266
51–100	Jump	0.5	1	GAM	0.406229	0.745603	0.0701152	0.0284001	0.0991476	0.0423671	0.03	0.03	0.911669	0.964224
51–100	Jump	0.5	1	LOWESS	0.445962	0.65697	0.0619712	0.0203555	0.0988121	0.0334909	0.09	0.15	0.90865	0.970673
51–100	Jump	0.5	1	MA	2.3058	5.90575	0.0818659	0.00885392	0.0757212	0.00718679	-0.01	0.01	0.8773	0.987077
51–100	Jump	0.5	1	PELT	2.84387	19.1611	0.821465	1.5647	0.116543	0.0834208	0.14	1.38	0.69233	0.790441
51–100	Jump	0.5	1	PR	0.769446	5.19333	0.204403	0.443577	0.101002	0.0679665	-0.75	1.11	0.82825	0.899637
51–100	Jump	0.5	2	ARIMA	-0.246953	0.999238	-0.0200585	0.011182	-0.0900229	0.0191621	-0.92	0.92	0.873274	0.975081
51–100	Jump	0.5	2	FLSA	-0.0677076	0.351012	-0.00313039	0.00863573	-0.0261066	0.0139816	0.9	2.06	0.919622	0.969698
51–100	Jump	0.5	2	GAM	0.309306	0.590774	0.0437484	0.0157872	0.0705683	0.0298515	0.02	0.02	0.937734	0.975036
51–100	Jump	0.5	2	LOWESS	0.36758	0.501446	0.0394904	0.0117637	0.0750846	0.0239179	0.04	0.04	0.933045	0.979816
51–100	Jump	0.5	2	MA	2.09462	4.90733	0.06008	0.0051949	0.0520506	0.00369271	-0.02	0.02	0.900787	0.991072
51–100	Jump	0.5	2	PELT	2.92666	19.1569	0.823889	1.48039	0.128296	0.0811969	0.23	1.47	0.678928	0.797248
51–100	Jump	0.5	2	PR	0.900311	5.97891	0.212722	0.369733	0.0814581	0.0541264	-0.61	1.27	0.843584	0.913085
51–100	Jump	1	0.33	ARIMA	0.0986508	4.05721	0.0394288	0.247154	-0.0671541	0.113025	-0.74	0.76	0.898011	0.884759
51–100	Jump	1	0.33	FLSA	-0.286777	0.599319	-0.0699603	0.0349188	-0.064565	0.0329958	0.88	1.98	0.879317	0.953808
51–100	Jump	1	0.33	GAM	0.63726	1.53671	0.13723	0.146754	0.162993	0.0929296	0.01	0.01	0.85505	0.916167
51–100	Jump	1	0.33	LOWESS	0.625298	1.27868	0.100831	0.0946402	0.140687	0.0664085	0.08	0.08	0.871587	0.939853
51–100	Jump	1	0.33	MA	2.31655	6.11171	0.0469481	0.0148028	0.0613253	0.0124671	0	0	0.893376	0.982426
51–100	Jump	1	0.33	PELT	0.686674	9.92189	0.369171	1.25425	-0.0623584	0.110664	-0.45	1.07	0.837517	0.805954
51–100	Jump	1	0.33	PR	0.83096	3.9306	0.222395	0.380101	0.16055	0.125819	-0.79	0.91	0.787433	0.864709
51–100	Jump	1	0.66	ARIMA	0.0544394	3.19108	-0.0151357	0.115723	-0.08329	0.0836287	-0.72	0.72	0.896001	0.91765
51–100	Jump	1	0.66	FLSA	-0.341369	0.678804	-0.090858	0.0261013	-0.0815846	0.0292495	0.83	1.95	0.867217	0.95748
51–100	Jump	1	0.66	GAM	0.488138	1.0841	0.0642441	0.0760674	0.118289	0.0587745	0	0	0.900997	0.947967
51–100	Jump	1	0.66	LOWESS	0.497496	0.918961	0.0386332	0.0498394	0.0960747	0.0408432	0.02	0.02	0.918317	0.963652
51–100	Jump	1	0.66	MA	1.90425	4.23859	-0.0282498	0.00372171	0.00488923	0.00321728	0	0	0.942464	0.992482
51–100	Jump	1	0.66	PELT	2.43826	18.7517	0.772987	1.74606	0.0510161	0.10843	0.11	1.35	0.7453	0.761712
51–100	Jump	1	0.66	PR	0.781106	3.86454	0.183443	0.331169	0.126237	0.0945689	-0.71	1.01	0.820462	0.890564
51–100	Jump	1	1	ARIMA	0.0174023	3.19663	-0.0451106	0.0770693	-0.103582	0.069482	-0.73	0.73	0.878132	0.931113
51–100	Jump	1	1	FLSA	-0.281993	0.477429	-0.0800117	0.0223457	-0.0623943	0.0260128	1.01	2.29	0.869913	0.957401
51–100	Jump	1	1	GAM	0.442862	0.959663	0.036335	0.0552159	0.0971843	0.0451531	0	0	0.920778	0.96008
51–100	Jump	1	1	LOWESS	0.435473	0.763378	0.013327	0.0363729	0.0779008	0.0314294	0	0	0.937626	0.972231
51–100	Jump	1	1	MA	1.76924	3.6215	-0.0496259	0.0045986	-0.0156071	0.00291866	0	0	0.934822	0.993335
51–100	Jump	1	1	PELT	2.58054	18.6694	0.782322	1.66704	0.0593939	0.102697	0.19	1.43	0.73117	0.770474
51–100	Jump	1	1	PR	0.938152	5.62821	0.214198	0.469775	0.120407	0.0880532	-0.62	1.1	0.819697	0.882623
51–100	Jump	1	2	ARIMA	-0.328409	2.08952	-0.107162	0.0422066	-0.155335	0.0549186	-0.8	0.8	0.82385	0.945388
51–100	Jump	1	2	FLSA	-0.396334	0.358131	-0.0985436	0.0210746	-0.0748979	0.0236767	1.02	2.2	0.855656	0.960185
51–100	Jump	1	2	GAM	0.375172	0.753901	0.00391674	0.0357037	0.074606	0.0320363	0	0	0.943157	0.971829
51–100	Jump	1	2	LOWESS	0.369139	0.582918	-0.0146948	0.0235669	0.057037	0.0217548	0.02	0.02	0.950647	0.980649
51–100	Jump	1	2	MA	1.58601	2.97834	-0.0715786	0.00660626	-0.0385567	0.00347134	-0.01	0.01	0.920153	0.993386
51–100	Jump	1	2	PELT	2.65115	18.6951	0.790038	1.58805	0.0733197	0.102017	0.28	1.68	0.71556	0.774447
51–100	Jump	1	2	PR	1.0046	6.04345	0.202792	0.407798	0.103438	0.0686907	-0.54	1.2	0.835127	0.900073
51–100	Jump	2	0.33	ARIMA	1.33415	8.56737	0.199577	1.13771	0.117122	0.260719	-0.23	0.41	0.839549	0.71661
51–100	Jump	2	0.33	FLSA	-0.98559	1.68939	-0.490029	0.313208	-0.21769	0.0890474	0.82	1.86	0.70095	0.891142
51–100	Jump	2	0.33	GAM	0.877445	2.10037	0.0299877	0.3348	0.185752	0.0994148	0	0	0.856266	0.897076
51–100	Jump	2	0.33	LOWESS	0.728057	1.57273	-0.057356	0.221477	0.135496	0.0673539	0.07	0.07	0.881367	0.929448
51–100	Jump	2	0.33	MA	1.16451	2.08848	-0.424748	0.216509	-0.0798684	0.0253264	0.09	0.13	0.828925	0.960402
51–100	Jump	2	0.33	PELT	0.556693	12.3673	0.227339	1.7092	-0.130519	0.211594	-0.23	0.99	0.844852	0.705557
51–100	Jump	2	0.33	PR	1.32816	6.9908	0.224319	0.951145	0.21645	0.149342	-0.6	0.98	0.755552	0.804061
51–100	Jump	2	0.66	ARIMA	1.47737	7.24236	0.147779	0.705942	0.13677	0.198423	-0.17	0.29	0.838258	0.790745
51–100	Jump	2	0.66	FLSA	-0.93145	1.56381	-0.470764	0.29663	-0.204355	0.0823673	0.89	2.01	0.70848	0.896137
51–100	Jump	2	0.66	GAM	0.816361	1.69294	-0.052891	0.213516	0.137682	0.0613014	0	0	0.883058	0.935077
51–100	Jump	2	0.66	LOWESS	0.632533	1.21131	-0.129164	0.156846	0.097327	0.0416129	0.06	0.06	0.893205	0.954248
51–100	Jump	2	0.66	MA	0.766115	1.01991	-0.499906	0.270486	-0.124858	0.0294199	0.08	0.1	0.798595	0.954615
51–100	Jump	2	0.66	PELT	1.93084	18.2759	0.555165	2.03117	-0.0352165	0.187879	0.23	1.49	0.800676	0.690516
51–100	Jump	2	0.66	PR	1.42108	6.72956	0.185045	0.691225	0.207724	0.112594	-0.46	1.02	0.773685	0.848369
51–100	Jump	2	1	ARIMA	1.56619	6.49526	0.100349	0.536908	0.13837	0.162219	-0.15	0.19	0.845458	0.830038
51–100	Jump	2	1	FLSA	-0.979668	1.75759	-0.479487	0.309809	-0.220216	0.0911112	0.8	1.94	0.702872	0.889124
51–100	Jump	2	1	GAM	0.791405	1.50896	-0.0835453	0.172924	0.11736	0.0478086	0	0	0.890092	0.948532
51–100	Jump	2	1	LOWESS	0.582762	1.04462	-0.161123	0.135968	0.0809998	0.0320424	0.07	0.07	0.89706	0.963195
51–100	Jump	2	1	MA	0.608749	0.735994	-0.527117	0.293533	-0.143934	0.0324666	0.11	0.13	0.784421	0.950609
51–100	Jump	2	1	PELT	1.88132	17.7539	0.525932	1.9301	-0.0423404	0.179795	0.25	1.55	0.802588	0.702365
51–100	Jump	2	1	PR	1.42388	6.85038	0.167217	0.687636	0.198099	0.103192	-0.4	1.08	0.785986	0.854759
51–100	Jump	2	2	ARIMA	1.83279	5.32736	0.0760121	0.361112	0.161643	0.111159	-0.03	0.05	0.836553	0.88248
51–100	Jump	2	2	FLSA	-1.08263	1.69396	-0.504535	0.313786	-0.236349	0.092051	0.77	1.83	0.689431	0.889138
51–100	Jump	2	2	GAM	0.770027	1.30076	-0.116002	0.13183	0.0928416	0.0340415	0	0	0.899042	0.962329
51–100	Jump	2	2	LOWESS	0.556033	0.890549	-0.189517	0.115195	0.0622413	0.0225225	0.07	0.07	0.903022	0.972194
51–100	Jump	2	2	MA	0.439791	0.488186	-0.559338	0.321412	-0.167077	0.0360044	0.12	0.14	0.768694	0.946011
51–100	Jump	2	2	PELT	2.18288	19.0073	0.585924	1.95768	-0.0191679	0.165684	0.56	2.14	0.775963	0.703814
51–100	Jump	2	2	PR	1.70441	8.15713	0.215076	0.651827	0.205268	0.0929264	-0.17	1.21	0.779716	0.862265
51–100	Linear	0.25	0.33	ARIMA	0.162516	1.68117	0.0530634	0.0726584	-0.0314468	0.0342196	-1.89	3.67	0.836047	0.933894
51–100	Linear	0.25	0.33	FLSA	0.234298	0.252535	0.0453516	0.00821508	0.0387975	0.0170284	-0.14	1.46	0.950724	0.972924
51–100	Linear	0.25	0.33	GAM	0.503298	0.693271	0.0741505	0.0239885	0.0991362	0.0359489	-0.98	0.98	0.847028	0.961148
51–100	Linear	0.25	0.33	LOWESS	0.61163	0.709832	0.0818303	0.0239373	0.117735	0.0357252	-0.91	0.97	0.836815	0.961391
51–100	Linear	0.25	0.33	MA	3.59337	13.9997	0.237717	0.0644009	0.181042	0.0392117	-0.99	0.99	0.699029	0.940775
51–100	Linear	0.25	0.33	PELT	-0.207788	0.0923635	-0.00671827	0.000957388	-0.0812361	0.00839208	-1.94	3.84	0.814817	0.958725
51–100	Linear	0.25	0.33	PR	0.503684	1.22719	0.0776852	0.0439455	0.0824204	0.0332583	-1.97	3.91	0.791122	0.935169
51–100	Linear	0.25	0.66	ARIMA	0.142567	1.66309	0.0499297	0.0600483	-0.0333465	0.0324137	-1.89	3.67	0.836142	0.936211
51–100	Linear	0.25	0.66	FLSA	0.1506	0.135212	0.0247395	0.00313234	0.0178036	0.00935089	0.02	1.12	0.978344	0.982327
51–100	Linear	0.25	0.66	GAM	0.326773	0.369739	0.0388339	0.0082202	0.0545887	0.0185607	-1	1	0.882628	0.975752
51–100	Linear	0.25	0.66	LOWESS	0.41933	0.379401	0.04433	0.00825909	0.0695257	0.0180725	-0.91	0.97	0.876682	0.976377
51–100	Linear	0.25	0.66	MA	3.21483	11.2665	0.172923	0.0348437	0.12644	0.0197021	-1.02	1.06	0.747572	0.960205
51–100	Linear	0.25	0.66	PELT	-0.138948	0.327418	0.00510038	0.00813769	-0.0720622	0.0103375	-1.88	3.8	0.825589	0.95683
51–100	Linear	0.25	0.66	PR	0.323493	0.747202	0.0405571	0.0182778	0.0420662	0.0165843	-1.98	3.94	0.823448	0.949708
51–100	Linear	0.25	1	ARIMA	0.109212	1.5196	0.041941	0.0459496	-0.0391133	0.0284802	-1.9	3.7	0.83482	0.940087
51–100	Linear	0.25	1	FLSA	0.0854829	0.0944553	0.0146748	0.00158157	-0.00206056	0.00680921	0.03	1.29	0.991237	0.982888
51–100	Linear	0.25	1	GAM	0.2568	0.257039	0.0263315	0.00450291	0.0371805	0.0127578	-1	1	0.896927	0.980577
51–100	Linear	0.25	1	LOWESS	0.336142	0.261444	0.0305748	0.00445316	0.0493082	0.0121775	-0.88	0.92	0.89523	0.981736
51–100	Linear	0.25	1	MA	3.11767	10.7061	0.156484	0.0291697	0.106621	0.0143119	-1.04	1.12	0.762664	0.964816
51–100	Linear	0.25	1	PELT	-0.0470795	0.689145	0.0139	0.0136534	-0.0664742	0.0107633	-1.85	3.65	0.830798	0.957043
51–100	Linear	0.25	1	PR	0.263715	0.613944	0.0299741	0.0129357	0.0282647	0.0121766	-1.98	3.94	0.834345	0.953525
51–100	Linear	0.25	2	ARIMA	-0.0229023	0.606992	0.0110207	0.0085915	-0.0577025	0.0146793	-1.91	3.73	0.832646	0.953905
51–100	Linear	0.25	2	FLSA	0.0790464	0.0841638	0.00856055	0.000646055	-0.00819421	0.00438063	0.05	1.15	0.987547	0.986082
51–100	Linear	0.25	2	GAM	0.17535	0.145186	0.0134759	0.00180003	0.0172554	0.00719894	-1	1	0.913097	0.985138
51–100	Linear	0.25	2	LOWESS	0.245047	0.157941	0.0175231	0.00186769	0.0270546	0.00711747	-0.97	0.97	0.906968	0.985452
51–100	Linear	0.25	2	MA	2.90366	9.43843	0.133884	0.0221284	0.0814282	0.00852381	-1.1	1.32	0.782226	0.969367
51–100	Linear	0.25	2	PELT	0.510798	2.72398	0.0776668	0.0449192	-0.0344818	0.0127937	-1.45	3.19	0.851267	0.955029
51–100	Linear	0.25	2	PR	0.176717	0.443317	0.0164096	0.00765865	0.00869218	0.00679342	-1.99	3.97	0.848923	0.957831
51–100	Linear	0.5	0.33	ARIMA	-0.00586395	1.86516	0.0309778	0.0830008	-0.105653	0.0510425	-1.86	3.58	0.806388	0.921292
51–100	Linear	0.5	0.33	FLSA	-0.0642662	0.165868	0.0038897	0.0044456	-0.0462174	0.0158947	-0.19	1.41	0.955889	0.974619
51–100	Linear	0.5	0.33	GAM	0.368889	0.672842	0.0662836	0.0336114	0.0425733	0.0361577	-0.96	0.96	0.885416	0.960453
51–100	Linear	0.5	0.33	LOWESS	0.496184	0.644938	0.0754937	0.0327093	0.0684108	0.031342	-0.9	0.94	0.869704	0.964384
51–100	Linear	0.5	0.33	MA	3.31941	12.1888	0.213121	0.0549884	0.10965	0.0221211	-0.99	0.99	0.748808	0.956429
51–100	Linear	0.5	0.33	PELT	-0.463404	0.260417	-0.0387953	0.00551655	-0.166627	0.0322871	-1.95	3.85	0.756452	0.940407
51–100	Linear	0.5	0.33	PR	0.34584	1.18389	0.0654465	0.0534681	0.0184873	0.0352799	-1.97	3.91	0.830814	0.932997
51–100	Linear	0.5	0.66	ARIMA	-0.0250296	1.99416	0.0283589	0.0712472	-0.109773	0.0499251	-1.87	3.61	0.803636	0.922603
51–100	Linear	0.5	0.66	FLSA	-0.133554	0.151134	-0.0111384	0.0031832	-0.0731541	0.0152637	-0.17	1.49	0.937425	0.974493
51–100	Linear	0.5	0.66	GAM	0.200625	0.373805	0.0253974	0.0126517	0.000639833	0.0214408	-0.96	0.96	0.922267	0.973573
51–100	Linear	0.5	0.66	LOWESS	0.28449	0.3393	0.0309928	0.0123067	0.0177291	0.0182005	-0.91	0.99	0.912635	0.975832
51–100	Linear	0.5	0.66	MA	2.98082	9.98002	0.149673	0.028284	0.0562184	0.00995987	-1.01	1.05	0.797001	0.969611
51–100	Linear	0.5	0.66	PELT	-0.350746	0.680994	-0.0239646	0.0140417	-0.159279	0.0314178	-1.86	3.84	0.771334	0.94003
51–100	Linear	0.5	0.66	PR	0.190488	0.808146	0.0284851	0.0253542	-0.0178887	0.0234234	-1.97	3.91	0.842477	0.94431
51–100	Linear	0.5	1	ARIMA	-0.0402853	1.74326	0.0178561	0.0513591	-0.113255	0.0448156	-1.86	3.58	0.804217	0.928415
51–100	Linear	0.5	1	FLSA	-0.152728	0.128013	-0.0156619	0.00236527	-0.0756798	0.0144226	-0.08	1.26	0.940414	0.977285
51–100	Linear	0.5	1	GAM	0.125887	0.27266	0.0101587	0.00755038	-0.0178125	0.0169749	-0.95	0.95	0.918105	0.977565
51–100	Linear	0.5	1	LOWESS	0.202548	0.239055	0.0147194	0.00709549	-0.00276477	0.0139703	-0.92	0.94	0.926096	0.980012
51–100	Linear	0.5	1	MA	2.84556	9.09053	0.12772	0.0210802	0.0339553	0.00671505	-1.03	1.11	0.815628	0.973081
51–100	Linear	0.5	1	PELT	-0.301242	0.785487	-0.0212059	0.0138981	-0.155678	0.0303579	-1.85	3.65	0.775534	0.942396
51–100	Linear	0.5	1	PR	0.0954211	0.620728	0.0101583	0.0159627	-0.0386825	0.0187631	-1.98	3.94	0.836706	0.948414
51–100	Linear	0.5	2	ARIMA	-0.164933	1.20407	-0.00332979	0.0291692	-0.130594	0.0389726	-1.89	3.67	0.79311	0.934217
51–100	Linear	0.5	2	FLSA	-0.229465	0.128272	-0.0269453	0.00168159	-0.100315	0.0159889	-0.07	1.35	0.921614	0.975342
51–100	Linear	0.5	2	GAM	0.0310564	0.177388	-0.00625205	0.00375433	-0.0410184	0.0133299	-0.97	0.97	0.906377	0.980558
51–100	Linear	0.5	2	LOWESS	0.11217	0.150063	-0.00156473	0.00350784	-0.0254077	0.0104714	-0.98	0.98	0.913822	0.982692
51–100	Linear	0.5	2	MA	2.70273	8.27886	0.107059	0.015526	0.0100743	0.00414145	-1.09	1.27	0.832612	0.974929
51–100	Linear	0.5	2	PELT	0.277461	2.62894	0.0424097	0.0413517	-0.131516	0.025766	-1.46	3.14	0.809662	0.946218
51–100	Linear	0.5	2	PR	0.0172933	0.502284	-0.00346988	0.0101519	-0.0572632	0.0162204	-1.98	3.94	0.829892	0.950873
51–100	Linear	1	0.33	ARIMA	0.0229681	3.90062	0.0126655	0.223324	-0.192576	0.134693	-1.75	3.25	0.769577	0.850228
51–100	Linear	1	0.33	FLSA	-0.331798	0.374995	-0.0795386	0.0231896	-0.131885	0.0385232	0.2	0.96	0.88083	0.959784
51–100	Linear	1	0.33	GAM	0.395969	0.748473	0.0416305	0.0651573	0.00399836	0.0406218	-0.97	0.97	0.911495	0.954492
51–100	Linear	1	0.33	LOWESS	0.459232	0.697074	0.0520761	0.0619313	0.0184756	0.0344145	-0.9	1	0.904217	0.959228
51–100	Linear	1	0.33	MA	2.71932	8.51567	0.113186	0.0311683	-0.0098988	0.0188488	-0.99	0.99	0.837542	0.964804
51–100	Linear	1	0.33	PELT	-0.932549	1.02793	-0.16644	0.0446713	-0.333058	0.124061	-1.93	3.81	0.637104	0.86918
51–100	Linear	1	0.33	PR	0.344013	1.35898	0.0350624	0.100726	-0.028532	0.0518574	-1.96	3.88	0.832722	0.917288
51–100	Linear	1	0.66	ARIMA	-0.125357	3.194	-0.0312797	0.143247	-0.215699	0.122453	-1.76	3.28	0.750565	0.865374
51–100	Linear	1	0.66	FLSA	-0.455841	0.360195	-0.11406	0.0189849	-0.165056	0.0418481	0.03	0.93	0.86156	0.957859
51–100	Linear	1	0.66	GAM	0.270064	0.430998	-0.0109803	0.0303436	-0.0293339	0.0256208	-0.99	0.99	0.905096	0.968701
51–100	Linear	1	0.66	LOWESS	0.309437	0.38944	-0.00261715	0.0284738	-0.017906	0.0217118	-0.93	1.05	0.916681	0.971322
51–100	Linear	1	0.66	MA	2.25156	6.06924	0.0410203	0.0114924	-0.0524929	0.0170517	-1.01	1.03	0.837473	0.970043
51–100	Linear	1	0.66	PELT	-0.832965	1.13849	-0.162898	0.0403671	-0.333019	0.118048	-1.83	3.69	0.645217	0.874796
51–100	Linear	1	0.66	PR	0.220239	0.85143	-0.019778	0.0446012	-0.0566886	0.0333302	-1.97	3.91	0.822975	0.935471
51–100	Linear	1	1	ARIMA	-0.0633421	3.24704	-0.0315582	0.121549	-0.210407	0.116539	-1.74	3.22	0.755969	0.871712
51–100	Linear	1	1	FLSA	-0.474475	0.354252	-0.121083	0.0189274	-0.172234	0.0418884	0.08	1.04	0.852317	0.956873
51–100	Linear	1	1	GAM	0.212295	0.321529	-0.0317224	0.0215791	-0.0445663	0.0211126	-1	1	0.892582	0.972832
51–100	Linear	1	1	LOWESS	0.249354	0.285212	-0.0234062	0.0197954	-0.0333202	0.0175617	-0.88	1.12	0.908102	0.974632
51–100	Linear	1	1	MA	2.09643	5.35372	0.0150675	0.00730958	-0.0717288	0.0174443	-1.02	1.06	0.834602	0.970596
51–100	Linear	1	1	PELT	-0.744602	1.51775	-0.14887	0.0434434	-0.323762	0.115993	-1.82	3.58	0.654869	0.876594
51–100	Linear	1	1	PR	0.173556	0.691375	-0.0378944	0.0332914	-0.0673359	0.0282286	-1.97	3.91	0.814517	0.940276
51–100	Linear	1	2	ARIMA	-0.23292	2.51635	-0.0713932	0.0837683	-0.237196	0.111489	-1.76	3.28	0.729075	0.878439
51–100	Linear	1	2	FLSA	-0.567614	0.452394	-0.138783	0.0222736	-0.209238	0.0551771	-0.09	1.29	0.823796	0.944251
51–100	Linear	1	2	GAM	0.138764	0.213387	-0.0552231	0.0150534	-0.0641724	0.0175383	-0.99	0.99	0.878778	0.976262
51–100	Linear	1	2	LOWESS	0.175007	0.184857	-0.0469448	0.0134173	-0.0549262	0.0148386	-0.96	1.02	0.886978	0.978202
51–100	Linear	1	2	MA	1.98167	4.92544	-0.00642836	0.00479501	-0.0914291	0.0182435	-1.03	1.11	0.82703	0.970213
51–100	Linear	1	2	PELT	-0.21144	2.72908	-0.0946846	0.0535235	-0.3043	0.102175	-1.48	3.12	0.70518	0.888617
51–100	Linear	1	2	PR	0.114482	0.523349	-0.0582517	0.0237486	-0.0808375	0.0235718	-1.97	3.91	0.804393	0.944632
51–100	Linear	2	0.33	ARIMA	1.96159	8.25927	0.304925	0.711317	0.0452303	0.145107	-1.01	1.31	0.79505	0.81969
51–100	Linear	2	0.33	FLSA	-1.20147	1.90035	-0.537378	0.348344	-0.405187	0.222345	-0.37	1.33	0.613924	0.794556
51–100	Linear	2	0.33	GAM	0.715061	1.03153	-0.0174641	0.176298	-0.00530955	0.0379102	-0.87	1.07	0.915245	0.946871
51–100	Linear	2	0.33	LOWESS	0.639335	0.946281	-0.0338019	0.176085	-0.0183185	0.0385516	-0.98	1	0.89852	0.947117
51–100	Linear	2	0.33	MA	1.57646	3.15692	-0.200121	0.113055	-0.142408	0.0598947	-0.87	0.89	0.779896	0.93435
51–100	Linear	2	0.33	PELT	-1.69029	3.90896	-0.600787	0.579582	-0.626397	0.447817	-1.85	3.57	0.418836	0.601051
51–100	Linear	2	0.33	PR	0.800416	1.84015	-0.0181018	0.260991	-0.0140843	0.0531661	-1.86	3.58	0.840845	0.906351
51–100	Linear	2	0.66	ARIMA	2.12941	6.77685	0.30461	0.661619	0.106454	0.0680517	-0.85	0.97	0.76836	0.882946
51–100	Linear	2	0.66	FLSA	-1.16583	1.77256	-0.53206	0.329806	-0.389488	0.205176	-0.11	1.09	0.637135	0.810409
51–100	Linear	2	0.66	GAM	0.574721	0.652461	-0.101783	0.105281	-0.040244	0.0254686	-0.9	1.08	0.878463	0.961994
51–100	Linear	2	0.66	LOWESS	0.518686	0.60026	-0.108231	0.105231	-0.0491557	0.0268583	-0.99	0.99	0.867332	0.961809
51–100	Linear	2	0.66	MA	0.978753	1.35941	-0.278488	0.119177	-0.159984	0.051911	-0.88	0.88	0.768088	0.941982
51–100	Linear	2	0.66	PELT	-1.15439	3.48333	-0.456189	0.448085	-0.505735	0.357023	-1.45	2.93	0.523586	0.677405
51–100	Linear	2	0.66	PR	0.67038	1.27508	-0.103703	0.156849	-0.0449545	0.0358176	-1.86	3.58	0.809128	0.927516
51–100	Linear	2	1	ARIMA	1.99634	5.82208	0.23797	0.483726	0.0932056	0.0489681	-0.83	0.95	0.792815	0.911258
51–100	Linear	2	1	FLSA	-1.23492	1.8719	-0.561584	0.352757	-0.410353	0.21336	-0.12	1	0.619097	0.803422
51–100	Linear	2	1	GAM	0.510666	0.513472	-0.135854	0.0869862	-0.0556502	0.0216733	-0.97	1.03	0.859405	0.966869
51–100	Linear	2	1	LOWESS	0.467131	0.471483	-0.138159	0.0864713	-0.0621453	0.0231628	-1	1	0.854289	0.966098
51–100	Linear	2	1	MA	0.78062	0.914096	-0.305961	0.124919	-0.168459	0.0502884	-0.86	0.86	0.763839	0.943437
51–100	Linear	2	1	PELT	-0.610965	4.22403	-0.351993	0.382965	-0.423035	0.297748	-1.24	2.42	0.602852	0.726784
51–100	Linear	2	1	PR	0.616267	1.00905	-0.141985	0.114221	-0.0586153	0.0272722	-1.86	3.58	0.795126	0.937345
51–100	Linear	2	2	ARIMA	1.91457	5.68398	0.200225	0.412682	0.0865371	0.0375482	-0.73	1.07	0.812067	0.924102
51–100	Linear	2	2	FLSA	-1.28997	2.021	-0.58298	0.378348	-0.435909	0.233361	-0.22	1.08	0.595934	0.786232
51–100	Linear	2	2	GAM	0.437116	0.37042	-0.177673	0.0746661	-0.076141	0.0188217	-1	1	0.838971	0.970403
51–100	Linear	2	2	LOWESS	0.403047	0.335897	-0.174164	0.0725637	-0.0791214	0.0200647	-1	1	0.838816	0.969664
51–100	Linear	2	2	MA	0.56826	0.530126	-0.329618	0.128276	-0.173711	0.0459602	-0.86	0.86	0.761161	0.946869
51–100	Linear	2	2	PELT	0.0324589	5.27173	-0.305218	0.328564	-0.394247	0.258924	-0.82	2	0.660033	0.760353
51–100	Linear	2	2	PR	0.550414	0.783567	-0.180604	0.0934587	-0.0747751	0.0222119	-1.86	3.58	0.780131	0.942914
51–100	Quadratic	0.25	0.33	ARIMA	0.121543	1.35152	0.044452	0.0523951	-0.0119351	0.0263104	-2.89	8.45	0.780121	0.899162
51–100	Quadratic	0.25	0.33	FLSA	0.220438	0.245903	0.0491651	0.00898897	0.0573755	0.0177521	-1.18	2.66	0.869306	0.961574
51–100	Quadratic	0.25	0.33	GAM	0.664123	0.798662	0.0944777	0.0238004	0.164429	0.0474912	-1.99	3.97	0.740015	0.926134
51–100	Quadratic	0.25	0.33	LOWESS	0.739185	0.806284	0.0986049	0.0216109	0.169978	0.044245	-1.87	3.69	0.742044	0.931144
51–100	Quadratic	0.25	0.33	MA	3.17986	11.3786	0.2061	0.0513705	0.191943	0.0414767	-2	4	0.651512	0.916817
51–100	Quadratic	0.25	0.33	PELT	-0.136729	0.240869	0.00436146	0.00352155	-0.0534719	0.00429689	-2.89	8.51	0.767901	0.919124
51–100	Quadratic	0.25	0.33	PR	0.600544	0.781143	0.0836777	0.0266015	0.147489	0.0418042	-2.98	8.9	0.690634	0.88683
51–100	Quadratic	0.25	0.66	ARIMA	0.0414703	1.24512	0.039225	0.0453677	-0.0207605	0.0249228	-2.92	8.6	0.776466	0.899457
51–100	Quadratic	0.25	0.66	FLSA	0.194511	0.283073	0.0393165	0.0059933	0.035438	0.010546	-1.14	2.58	0.887114	0.96788
51–100	Quadratic	0.25	0.66	GAM	0.499165	0.48839	0.0606023	0.00930418	0.121718	0.0281518	-2	4	0.772043	0.941598
51–100	Quadratic	0.25	0.66	LOWESS	0.556014	0.4958	0.0659311	0.00938356	0.127005	0.026831	-1.9	3.7	0.773296	0.945227
51–100	Quadratic	0.25	0.66	MA	2.62236	8.35478	0.141817	0.0272151	0.140144	0.022535	-2.01	4.05	0.700746	0.935432
51–100	Quadratic	0.25	0.66	PELT	-0.0535786	0.343917	0.018192	0.00626229	-0.0332113	0.0081793	-2.78	8.08	0.784193	0.919935
51–100	Quadratic	0.25	0.66	PR	0.517133	1.16284	0.0593996	0.0166437	0.111079	0.0250656	-2.97	8.87	0.715349	0.899252
51–100	Quadratic	0.25	1	ARIMA	0.0184983	0.787391	0.0211969	0.0138675	-0.0261194	0.014589	-2.9	8.5	0.779564	0.910558
51–100	Quadratic	0.25	1	FLSA	0.164382	0.219585	0.0296022	0.00346069	0.0286293	0.00747112	-1.05	2.35	0.899913	0.972528
51–100	Quadratic	0.25	1	GAM	0.435774	0.39727	0.0497396	0.00611466	0.103314	0.0217881	-2	4	0.785325	0.946646
51–100	Quadratic	0.25	1	LOWESS	0.487782	0.396123	0.0550555	0.00641263	0.111419	0.0212392	-1.83	3.51	0.789739	0.951407
51–100	Quadratic	0.25	1	MA	2.42749	7.45939	0.122741	0.0215742	0.121366	0.0172235	-2	4.02	0.718769	0.941017
51–100	Quadratic	0.25	1	PELT	0.00892954	0.706312	0.0327975	0.0185107	-0.0305996	0.00869819	-2.81	8.11	0.781213	0.917963
51–100	Quadratic	0.25	1	PR	0.485862	1.15964	0.0530232	0.0138241	0.0953101	0.0203135	-2.96	8.82	0.725574	0.903269
51–100	Quadratic	0.25	2	ARIMA	0.116304	0.744056	0.0206172	0.00516383	-0.0152691	0.0120706	-2.83	8.15	0.787894	0.916209
51–100	Quadratic	0.25	2	FLSA	0.211894	0.185556	0.033275	0.00352096	0.0421279	0.00792973	-0.79	1.51	0.907864	0.9798
51–100	Quadratic	0.25	2	GAM	0.35857	0.301436	0.0394105	0.00404149	0.0822227	0.0157319	-2	4	0.800284	0.951387
51–100	Quadratic	0.25	2	LOWESS	0.414126	0.301398	0.0442467	0.0043345	0.0938814	0.0159463	-1.77	3.39	0.806858	0.956678
51–100	Quadratic	0.25	2	MA	2.12412	6.28554	0.102007	0.0166935	0.0968412	0.0112954	-2.06	4.34	0.738269	0.944177
51–100	Quadratic	0.25	2	PELT	0.753032	3.08431	0.126154	0.0578636	0.0337158	0.01734	-2.33	6.33	0.777038	0.922215
51–100	Quadratic	0.25	2	PR	0.427159	1.10883	0.0437944	0.0108323	0.0742384	0.0145408	-2.95	8.81	0.739569	0.907714
51–100	Quadratic	0.5	0.33	ARIMA	-0.137961	1.31601	0.021076	0.0514408	-0.0762407	0.0308095	-2.89	8.45	0.753091	0.896098
51–100	Quadratic	0.5	0.33	FLSA	-0.0511302	0.163193	0.020458	0.00490105	-0.0121452	0.0112949	-1.16	2.56	0.906394	0.967716
51–100	Quadratic	0.5	0.33	GAM	0.472716	0.660791	0.0917066	0.0281287	0.11931	0.0404332	-1.98	3.94	0.768922	0.931429
51–100	Quadratic	0.5	0.33	LOWESS	0.551409	0.616914	0.0906621	0.0227646	0.123089	0.033012	-1.88	3.72	0.77181	0.939313
51–100	Quadratic	0.5	0.33	MA	2.91771	9.78159	0.18776	0.044273	0.134371	0.0232281	-1.99	3.97	0.690163	0.932785
51–100	Quadratic	0.5	0.33	PELT	-0.398719	0.370319	-0.0168982	0.0037847	-0.116831	0.0150425	-2.91	8.59	0.727312	0.910644
51–100	Quadratic	0.5	0.33	PR	0.48072	1.50493	0.0845399	0.041198	0.0975471	0.0337505	-2.96	8.82	0.718174	0.891343
51–100	Quadratic	0.5	0.66	ARIMA	-0.142987	1.48334	0.0247363	0.0479031	-0.0772799	0.0319244	-2.9	8.5	0.751052	0.894967
51–100	Quadratic	0.5	0.66	FLSA	-0.0992866	0.184768	0.00827588	0.00262481	-0.0367944	0.00842492	-1.14	2.54	0.895201	0.970201
51–100	Quadratic	0.5	0.66	GAM	0.30752	0.395785	0.0537602	0.0108929	0.0769346	0.0238284	-1.99	3.97	0.801884	0.945038
51–100	Quadratic	0.5	0.66	LOWESS	0.376052	0.37473	0.0562279	0.00965552	0.0817453	0.0198721	-1.93	3.79	0.801282	0.94969
51–100	Quadratic	0.5	0.66	MA	2.4185	7.44939	0.127873	0.0239649	0.086119	0.0110098	-2.02	4.1	0.735018	0.944715
51–100	Quadratic	0.5	0.66	PELT	-0.313321	0.424079	-0.0030799	0.00584928	-0.0979884	0.0163926	-2.82	8.2	0.747021	0.91297
51–100	Quadratic	0.5	0.66	PR	0.233671	0.395822	0.0431852	0.0124677	0.0575524	0.0211039	-2.98	8.9	0.749714	0.902889
51–100	Quadratic	0.5	1	ARIMA	-0.0728807	1.46876	0.0265651	0.0379791	-0.0670734	0.0302223	-2.86	8.3	0.75979	0.898716
51–100	Quadratic	0.5	1	FLSA	-0.143051	0.165645	0.00420139	0.00263949	-0.0442398	0.00920762	-1.26	2.96	0.882664	0.965847
51–100	Quadratic	0.5	1	GAM	0.236981	0.311041	0.0402106	0.00688727	0.0586469	0.0185185	-2	4	0.815262	0.949096
51–100	Quadratic	0.5	1	LOWESS	0.300936	0.291272	0.0435004	0.00635176	0.0641514	0.0154921	-1.89	3.71	0.817582	0.953998
51–100	Quadratic	0.5	1	MA	2.183	6.51044	0.106342	0.0185076	0.0647941	0.0072247	-2.02	4.12	0.755318	0.948764
51–100	Quadratic	0.5	1	PELT	-0.220628	0.925686	0.014762	0.0205902	-0.0894123	0.0177671	-2.77	8.05	0.754075	0.911673
51–100	Quadratic	0.5	1	PR	0.204798	0.461459	0.0358251	0.00976308	0.0417132	0.0172761	-2.97	8.85	0.760249	0.906177
51–100	Quadratic	0.5	2	ARIMA	-0.0700818	0.833669	0.00394298	0.00525717	-0.0711879	0.0176103	-2.8	8	0.766545	0.913517
51–100	Quadratic	0.5	2	FLSA	-0.11675	0.15753	0.00575296	0.0024961	-0.0402397	0.00769292	-1.1	2.32	0.896074	0.972776
51–100	Quadratic	0.5	2	GAM	0.153222	0.236573	0.0265687	0.00410871	0.036596	0.0136453	-2	4	0.831689	0.952995
51–100	Quadratic	0.5	2	LOWESS	0.223739	0.21234	0.0314838	0.0041048	0.0457848	0.0116909	-1.89	3.75	0.831638	0.956717
51–100	Quadratic	0.5	2	MA	1.86343	5.30351	0.0855198	0.0137705	0.0437912	0.00496726	-2.01	4.25	0.777937	0.95093
51–100	Quadratic	0.5	2	PELT	0.512633	2.84658	0.107201	0.0546617	-0.0301072	0.0167437	-2.33	6.33	0.787854	0.923142
51–100	Quadratic	0.5	2	PR	0.261306	1.14511	0.0358003	0.0124296	0.0215682	0.0130082	-2.92	8.66	0.772387	0.909981
51–100	Quadratic	1	0.33	ARIMA	-0.534675	1.7953	-0.0466487	0.0643519	-0.182356	0.0657452	-2.85	8.25	0.690159	0.871716
51–100	Quadratic	1	0.33	FLSA	-0.522895	0.455887	-0.0574132	0.00895182	-0.11885	0.0263082	-1	2.14	0.837413	0.959569
51–100	Quadratic	1	0.33	GAM	0.175317	0.633732	0.0641751	0.0385464	0.0472773	0.0406604	-1.94	3.82	0.821596	0.931552
51–100	Quadratic	1	0.33	LOWESS	0.245844	0.450195	0.0509312	0.0248873	0.0426079	0.0253291	-1.9	3.7	0.828052	0.945195
51–100	Quadratic	1	0.33	MA	2.3874	7.18983	0.111388	0.0228879	0.021556	0.00628762	-1.99	3.97	0.774368	0.949727
51–100	Quadratic	1	0.33	PELT	-0.855654	1.03028	-0.0911817	0.0159909	-0.231271	0.0595996	-2.87	8.43	0.650277	0.878913
51–100	Quadratic	1	0.33	PR	0.095806	1.48012	0.0395579	0.0559457	0.00279894	0.039219	-2.95	8.77	0.782022	0.886838
51–100	Quadratic	1	0.66	ARIMA	-0.394116	2.09732	-0.0277143	0.0628007	-0.163347	0.0659272	-2.81	8.05	0.708529	0.873112
51–100	Quadratic	1	0.66	FLSA	-0.511089	0.465971	-0.0553308	0.0090435	-0.120921	0.0286106	-1.06	2.5	0.833104	0.954623
51–100	Quadratic	1	0.66	GAM	0.0226231	0.414717	0.0182116	0.0161622	0.00914912	0.0268948	-1.95	3.85	0.854434	0.943412
51–100	Quadratic	1	0.66	LOWESS	0.0942219	0.273008	0.0107109	0.0100815	0.00835158	0.0163752	-1.91	3.77	0.857696	0.952536
51–100	Quadratic	1	0.66	MA	1.86645	5.14046	0.0500522	0.010362	-0.023827	0.00493418	-2.03	4.15	0.794315	0.952296
51–100	Quadratic	1	0.66	PELT	-0.811807	1.02142	-0.0862243	0.0134833	-0.220767	0.0559769	-2.79	8.13	0.661867	0.88428
51–100	Quadratic	1	0.66	PR	-0.154805	0.505175	-0.0129561	0.017834	-0.0380609	0.0283513	-2.98	8.9	0.767237	0.897257
51–100	Quadratic	1	1	ARIMA	-0.324214	2.10181	-0.0248299	0.0507706	-0.15405	0.0618271	-2.78	7.9	0.717014	0.878203
51–100	Quadratic	1	1	FLSA	-0.596117	0.513261	-0.0720898	0.0085087	-0.145628	0.0299884	-1.01	2.21	0.816894	0.956152
51–100	Quadratic	1	1	GAM	-0.0260194	0.346383	0.00254063	0.0108823	-0.00503317	0.0222707	-1.9	3.74	0.863469	0.948296
51–100	Quadratic	1	1	LOWESS	0.0381464	0.207303	-0.00364193	0.00702787	-0.00314575	0.0130784	-1.91	3.81	0.863282	0.954927
51–100	Quadratic	1	1	MA	1.63676	4.44671	0.0297757	0.00799914	-0.0426711	0.00603746	-2.01	4.09	0.794789	0.952954
51–100	Quadratic	1	1	PELT	-0.703776	1.4443	-0.069673	0.0247357	-0.219638	0.0554165	-2.79	8.05	0.667659	0.884087
51–100	Quadratic	1	1	PR	-0.135569	1.0224	-0.0174022	0.0186547	-0.0518391	0.0266792	-2.96	8.82	0.761261	0.89855
51–100	Quadratic	1	2	ARIMA	-0.437423	1.40814	-0.0543111	0.0246797	-0.168532	0.0530133	-2.76	7.8	0.702997	0.88801
51–100	Quadratic	1	2	FLSA	-0.608384	0.466508	-0.0752526	0.00820307	-0.14564	0.0298742	-0.76	1.38	0.831585	0.963676
51–100	Quadratic	1	2	GAM	-0.0884297	0.270909	-0.0149664	0.0072128	-0.0201077	0.0176211	-1.86	3.64	0.854017	0.953003
51–100	Quadratic	1	2	LOWESS	-0.0323889	0.156764	-0.0185125	0.00519755	-0.0168008	0.0105055	-1.91	3.97	0.85282	0.955588
51–100	Quadratic	1	2	MA	1.43606	4.06914	0.0134323	0.00700001	-0.0635781	0.00844812	-2.07	4.43	0.787498	0.948605
51–100	Quadratic	1	2	PELT	0.0315664	2.58856	0.0256731	0.045592	-0.156413	0.0396301	-2.33	6.21	0.749987	0.908678
51–100	Quadratic	1	2	PR	-0.251537	0.578572	-0.0347474	0.0119487	-0.0708802	0.026229	-2.97	8.85	0.745285	0.899574
51–100	Quadratic	2	0.33	ARIMA	-0.184447	5.10969	-0.0621136	0.349347	-0.194904	0.178058	-2.53	6.69	0.707613	0.781917
51–100	Quadratic	2	0.33	FLSA	-1.32812	2.0696	-0.317617	0.125321	-0.297561	0.115431	-1.06	2.36	0.668578	0.880632
51–100	Quadratic	2	0.33	GAM	0.0161372	0.634073	-0.0360442	0.0866518	-0.0132878	0.0408692	-1.82	3.54	0.85748	0.930197
51–100	Quadratic	2	0.33	LOWESS	-0.104199	0.432466	-0.0975839	0.0587587	-0.0574273	0.029737	-1.96	3.88	0.809371	0.937752
51–100	Quadratic	2	0.33	MA	1.35775	3.26737	-0.196708	0.0506216	-0.189843	0.0436141	-1.97	3.91	0.694012	0.924824
51–100	Quadratic	2	0.33	PELT	-1.80463	3.74207	-0.38526	0.206258	-0.463487	0.238147	-2.85	8.35	0.476651	0.738161
51–100	Quadratic	2	0.33	PR	-0.241778	1.4074	-0.0797578	0.161268	-0.0653918	0.0803981	-2.84	8.2	0.747399	0.855055
51–100	Quadratic	2	0.66	ARIMA	-0.136746	4.0634	-0.0870673	0.239016	-0.176694	0.14775	-2.44	6.26	0.718495	0.815297
51–100	Quadratic	2	0.66	FLSA	-1.36345	2.15346	-0.329506	0.130285	-0.306834	0.119642	-1	2.18	0.664085	0.878538
51–100	Quadratic	2	0.66	GAM	-0.0677485	0.369126	-0.0918288	0.0511533	-0.0382464	0.0273591	-1.83	3.67	0.830284	0.942024
51–100	Quadratic	2	0.66	LOWESS	-0.22751	0.295388	-0.152797	0.0472608	-0.0843923	0.0232424	-1.99	3.97	0.779203	0.94277
51–100	Quadratic	2	0.66	MA	0.85085	2.25704	-0.257671	0.0742944	-0.230668	0.0592765	-2.01	4.09	0.670287	0.911038
51–100	Quadratic	2	0.66	PELT	-1.68918	3.57025	-0.370926	0.187858	-0.437726	0.225167	-2.72	7.94	0.49862	0.751638
51–100	Quadratic	2	0.66	PR	-0.218764	1.55162	-0.119294	0.108789	-0.081444	0.0611082	-2.76	7.88	0.737104	0.875114
51–100	Quadratic	2	1	ARIMA	-0.198159	3.53512	-0.110921	0.190033	-0.179599	0.137794	-2.43	6.21	0.711751	0.826744
51–100	Quadratic	2	1	FLSA	-1.4053	2.20465	-0.349282	0.135154	-0.322556	0.122127	-1.07	2.31	0.647726	0.875219
51–100	Quadratic	2	1	GAM	-0.0877377	0.24904	-0.110206	0.040891	-0.0443204	0.0210763	-1.85	3.63	0.821358	0.947947
51–100	Quadratic	2	1	LOWESS	-0.261348	0.255183	-0.169242	0.0457402	-0.0926449	0.0214451	-1.97	3.91	0.772165	0.944792
51–100	Quadratic	2	1	MA	0.730215	2.25208	-0.273286	0.0821305	-0.245862	0.0664136	-2.03	4.15	0.661166	0.904702
51–100	Quadratic	2	1	PELT	-1.59846	3.58545	-0.358452	0.176877	-0.43131	0.217104	-2.65	7.65	0.508485	0.760174
51–100	Quadratic	2	1	PR	-0.232579	1.26905	-0.137208	0.0880536	-0.0808826	0.0489206	-2.72	7.7	0.736026	0.887149
51–100	Quadratic	2	2	ARIMA	-0.391243	3.01541	-0.159894	0.151998	-0.202168	0.132412	-2.44	6.26	0.68656	0.833393
51–100	Quadratic	2	2	FLSA	-1.4631	2.50057	-0.359518	0.146889	-0.349874	0.141831	-1.23	2.83	0.622044	0.855236
51–100	Quadratic	2	2	GAM	-0.114772	0.145449	-0.129912	0.033265	-0.0516081	0.0154469	-1.89	3.75	0.810062	0.951739
51–100	Quadratic	2	2	LOWESS	-0.281689	0.200158	-0.184802	0.0445142	-0.0995755	0.018807	-1.98	3.94	0.764346	0.946623
51–100	Quadratic	2	2	MA	0.553689	2.26844	-0.291245	0.0920298	-0.264537	0.0763444	-2.03	4.33	0.652244	0.895133
51–100	Quadratic	2	2	PELT	-0.844597	4.08895	-0.256177	0.148548	-0.374119	0.179063	-2.23	6.15	0.587474	0.800021
51–100	Quadratic	2	2	PR	-0.201079	0.713152	-0.143488	0.0661881	-0.0708486	0.0357598	-2.63	7.25	0.746191	0.902694
51–100	Recurrent	0.25	0.33	ARIMA	0.0492145	0.770065	0.0184376	0.0119925	-0.0567883	0.0214308	-2.89	8.45	0.765059	0.906327
51–100	Recurrent	0.25	0.33	FLSA	0.232807	0.204866	0.0326559	0.00551387	0.0110679	0.00743384	-1.1	2.4	0.904259	0.971961
51–100	Recurrent	0.25	0.33	GAM	0.688523	0.753087	0.079243	0.0149652	0.124964	0.0291852	-2	4	0.762535	0.940113
51–100	Recurrent	0.25	0.33	LOWESS	0.747622	0.753126	0.0822696	0.0135227	0.116156	0.0228586	-1.96	3.88	0.76782	0.945968
51–100	Recurrent	0.25	0.33	MA	2.84442	8.77622	0.179622	0.0385104	0.142328	0.0214242	-2.01	4.05	0.687962	0.934932
51–100	Recurrent	0.25	0.33	PELT	-0.0856399	0.362859	0.00637071	0.00987688	-0.09031	0.0107637	-2.89	8.51	0.750239	0.913924
51–100	Recurrent	0.25	0.33	PR	0.604545	0.569126	0.0656606	0.0101522	0.113598	0.0259294	-3	9	0.709217	0.898599
51–100	Recurrent	0.25	0.66	ARIMA	0.262094	2.03654	0.0488558	0.0452494	-0.0353059	0.0283136	-2.84	8.2	0.768271	0.899807
51–100	Recurrent	0.25	0.66	FLSA	0.295846	0.316674	0.0459109	0.00863954	0.0171237	0.00929627	-1.12	2.26	0.895103	0.971458
51–100	Recurrent	0.25	0.66	GAM	0.64651	0.667972	0.0707935	0.0109985	0.108446	0.0234037	-2	4	0.773807	0.944782
51–100	Recurrent	0.25	0.66	LOWESS	0.703097	0.659751	0.0743714	0.0103332	0.105787	0.0192993	-1.92	3.76	0.778384	0.950021
51–100	Recurrent	0.25	0.66	MA	2.14333	5.12593	0.110382	0.0152668	0.0997669	0.0113331	-2.01	4.05	0.737801	0.948105
51–100	Recurrent	0.25	0.66	PELT	0.00343345	0.440549	0.0170943	0.00995865	-0.076681	0.0114723	-2.79	8.07	0.76308	0.917296
51–100	Recurrent	0.25	0.66	PR	0.563187	0.504534	0.0582395	0.00767628	0.103097	0.0226002	-3	9	0.716612	0.901201
51–100	Recurrent	0.25	1	ARIMA	0.25538	1.91767	0.0431327	0.0365618	-0.0404633	0.0245188	-2.84	8.2	0.767083	0.903284
51–100	Recurrent	0.25	1	FLSA	0.270992	0.286543	0.040172	0.00663334	0.0115771	0.00799435	-1.15	2.47	0.898007	0.970731
51–100	Recurrent	0.25	1	GAM	0.648823	0.657874	0.0708535	0.0103542	0.104018	0.0218673	-2	4	0.776075	0.945978
51–100	Recurrent	0.25	1	LOWESS	0.68319	0.620383	0.0720494	0.00950395	0.1025	0.0184014	-1.91	3.73	0.781665	0.951062
51–100	Recurrent	0.25	1	MA	1.86	3.92032	0.0867827	0.00967901	0.0839771	0.00871109	-2.01	4.05	0.756721	0.951777
51–100	Recurrent	0.25	1	PELT	0.0135201	0.316359	0.0276598	0.012158	-0.0632441	0.0133507	-2.78	7.94	0.768022	0.917087
51–100	Recurrent	0.25	1	PR	0.673399	1.33677	0.0690615	0.0159191	0.103349	0.0223539	-2.96	8.86	0.714685	0.901129
51–100	Recurrent	0.25	2	ARIMA	0.363978	2.36542	0.054296	0.0393448	-0.0347884	0.0246292	-2.82	8.1	0.766665	0.903417
51–100	Recurrent	0.25	2	FLSA	0.181712	0.212694	0.0296423	0.00489353	-0.0070178	0.00788749	-1.31	3.03	0.893887	0.965973
51–100	Recurrent	0.25	2	GAM	0.659378	0.660977	0.0733846	0.0102307	0.10306	0.0216112	-2	4	0.77584	0.946173
51–100	Recurrent	0.25	2	LOWESS	0.677331	0.604736	0.0724335	0.00920786	0.102991	0.0182509	-1.88	3.64	0.783379	0.952019
51–100	Recurrent	0.25	2	MA	1.51768	2.65893	0.0640393	0.00535946	0.067444	0.00655117	-2.01	4.05	0.777309	0.955073
51–100	Recurrent	0.25	2	PELT	0.276921	0.74451	0.0777825	0.0267073	-0.0274177	0.0134527	-2.63	7.19	0.779971	0.922175
51–100	Recurrent	0.25	2	PR	0.759362	1.77695	0.0770257	0.0185288	0.103038	0.0223919	-2.93	8.73	0.713446	0.901605
51–100	Recurrent	0.5	0.33	ARIMA	-0.161019	0.91474	-0.0221757	0.014839	-0.154052	0.0447032	-2.88	8.4	0.714587	0.889926
51–100	Recurrent	0.5	0.33	FLSA	0.0713085	0.206403	-0.000283518	0.00548289	-0.0752078	0.0138214	-1.01	2.19	0.884192	0.969055
51–100	Recurrent	0.5	0.33	GAM	0.462075	0.491154	0.0368416	0.00945226	0.0299072	0.0145626	-2	4	0.826324	0.951626
51–100	Recurrent	0.5	0.33	LOWESS	0.537164	0.560889	0.0433662	0.00966476	0.0201954	0.0101261	-1.92	3.76	0.83389	0.956975
51–100	Recurrent	0.5	0.33	MA	2.58439	7.36361	0.130243	0.021972	0.0414567	0.00272366	-2	4	0.755401	0.951972
51–100	Recurrent	0.5	0.33	PELT	-0.384848	0.395555	-0.0481737	0.00709647	-0.197534	0.040537	-2.92	8.64	0.681181	0.891892
51–100	Recurrent	0.5	0.33	PR	0.375187	0.358168	0.0239132	0.00639994	0.0159214	0.0141136	-3	9	0.769948	0.907428
51–100	Recurrent	0.5	0.66	ARIMA	-0.0211367	1.05595	-0.0109477	0.0141898	-0.135077	0.0411783	-2.81	8.05	0.733534	0.8954
51–100	Recurrent	0.5	0.66	FLSA	-0.0275405	0.180558	-0.0134653	0.00404952	-0.0982499	0.0179351	-1.39	3.29	0.844287	0.956248
51–100	Recurrent	0.5	0.66	GAM	0.42157	0.435921	0.0255392	0.00675844	0.0090512	0.0107953	-2	4	0.840714	0.95468
51–100	Recurrent	0.5	0.66	LOWESS	0.486286	0.445439	0.0324619	0.00696462	0.00646449	0.00807209	-1.9	3.7	0.846052	0.959374
51–100	Recurrent	0.5	0.66	MA	1.89416	4.16457	0.0646848	0.00704782	0.000205352	0.00130294	-2.01	4.05	0.80445	0.957191
51–100	Recurrent	0.5	0.66	PELT	-0.246039	0.505649	-0.0275139	0.0112547	-0.179017	0.0380882	-2.79	8.07	0.705032	0.898215
51–100	Recurrent	0.5	0.66	PR	0.322197	0.280294	0.0124971	0.00452434	0.00246634	0.0112032	-3	9	0.78007	0.909704
51–100	Recurrent	0.5	1	ARIMA	0.00596096	1.08809	-0.010457	0.0129874	-0.13431	0.0396988	-2.8	8	0.734966	0.896949
51–100	Recurrent	0.5	1	FLSA	0.0406901	0.243304	-0.00903079	0.00500345	-0.0901922	0.0154983	-1.12	2.5	0.867194	0.965009
51–100	Recurrent	0.5	1	GAM	0.405261	0.409867	0.023392	0.00638673	0.00244522	0.00993499	-1.99	3.97	0.845741	0.955643
51–100	Recurrent	0.5	1	LOWESS	0.447545	0.390209	0.0280743	0.00639578	-0.00122533	0.00789137	-1.9	3.7	0.85066	0.959612
51–100	Recurrent	0.5	1	MA	1.59798	3.06126	0.0409195	0.00358889	-0.0157092	0.00191962	-2.01	4.05	0.807633	0.958199
51–100	Recurrent	0.5	1	PELT	-0.201141	0.42531	-0.00690596	0.0166047	-0.161521	0.0366973	-2.77	7.91	0.719948	0.90029
51–100	Recurrent	0.5	1	PR	0.416268	1.06674	0.0214418	0.0123195	-0.00172881	0.0109824	-2.97	8.87	0.77867	0.909612
51–100	Recurrent	0.5	2	ARIMA	0.0677195	1.12364	-0.00622331	0.0123567	-0.125953	0.0375585	-2.76	7.8	0.7413	0.900244
51–100	Recurrent	0.5	2	FLSA	-0.0225106	0.149454	-0.0143984	0.00357392	-0.0957631	0.0160065	-1.14	2.44	0.86201	0.96538
51–100	Recurrent	0.5	2	GAM	0.404049	0.387439	0.0238034	0.00645076	-0.00221843	0.00920697	-2	4	0.845109	0.955931
51–100	Recurrent	0.5	2	LOWESS	0.412142	0.324683	0.0238974	0.0052698	-0.00628579	0.0079304	-1.89	3.67	0.850317	0.960013
51–100	Recurrent	0.5	2	MA	1.2771	2.05962	0.0196054	0.00162406	-0.0316633	0.0034041	-2	4.02	0.811247	0.958609
51–100	Recurrent	0.5	2	PELT	0.013727	0.814414	0.0371284	0.0297418	-0.13445	0.0326252	-2.69	7.47	0.73641	0.905669
51–100	Recurrent	0.5	2	PR	0.360164	0.564131	0.0143995	0.00696335	-0.00635249	0.0105053	-2.98	8.9	0.778367	0.910614
51–100	Recurrent	1	0.33	ARIMA	-0.0643039	2.56958	-0.109193	0.0931077	-0.269707	0.131261	-2.72	7.6	0.652783	0.827922
51–100	Recurrent	1	0.33	FLSA	-0.442196	0.429417	-0.184727	0.040087	-0.277429	0.0870312	-1.08	2.32	0.721339	0.910123
51–100	Recurrent	1	0.33	GAM	0.10591	0.637886	-0.106349	0.0320097	-0.148885	0.0490685	-2	4	0.757133	0.92426
51–100	Recurrent	1	0.33	LOWESS	0.270588	0.636377	-0.0899406	0.0276718	-0.141389	0.0381476	-1.94	3.82	0.764574	0.934235
51–100	Recurrent	1	0.33	MA	2.02036	4.7464	-0.0455974	0.00631603	-0.14133	0.0216488	-2	4	0.731641	0.942031
51–100	Recurrent	1	0.33	PELT	-0.882778	1.02737	-0.228758	0.060009	-0.400793	0.163843	-2.91	8.61	0.543434	0.800687
51–100	Recurrent	1	0.33	PR	0.0937845	1.29464	-0.104115	0.0492516	-0.157171	0.0562102	-2.96	8.84	0.693197	0.87498
51–100	Recurrent	1	0.66	ARIMA	-0.086592	2.14516	-0.121479	0.065274	-0.271914	0.124146	-2.7	7.5	0.650178	0.836201
51–100	Recurrent	1	0.66	FLSA	-0.471201	0.393909	-0.187683	0.0411323	-0.282355	0.0877009	-1.07	2.21	0.718013	0.910516
51–100	Recurrent	1	0.66	GAM	0.0388669	0.633785	-0.124094	0.0340923	-0.178	0.0546294	-2	4	0.739933	0.920006
51–100	Recurrent	1	0.66	LOWESS	0.189153	0.533995	-0.107654	0.0288777	-0.166695	0.0447842	-1.92	3.78	0.750797	0.929699
51–100	Recurrent	1	0.66	MA	1.37482	2.50429	-0.110522	0.0143379	-0.182033	0.0356038	-2	4	0.711966	0.933527
51–100	Recurrent	1	0.66	PELT	-0.712513	1.05759	-0.194773	0.0601128	-0.370315	0.149698	-2.75	7.91	0.574845	0.816225
51–100	Recurrent	1	0.66	PR	-0.0200632	1.08699	-0.12813	0.0428338	-0.183577	0.0616662	-2.96	8.84	0.677314	0.871839
51–100	Recurrent	1	1	ARIMA	-0.0997809	1.96949	-0.129394	0.0576581	-0.275195	0.121956	-2.69	7.45	0.647452	0.838894
51–100	Recurrent	1	1	FLSA	-0.424627	0.344718	-0.181978	0.0396196	-0.274307	0.0835362	-0.89	1.71	0.734806	0.918052
51–100	Recurrent	1	1	GAM	0.0190295	0.628274	-0.129002	0.0353176	-0.189201	0.0573194	-1.99	3.97	0.73421	0.918196
51–100	Recurrent	1	1	LOWESS	0.180897	0.498754	-0.112408	0.0296034	-0.172273	0.0459428	-1.95	3.85	0.745262	0.928212
51–100	Recurrent	1	1	MA	1.08975	1.72419	-0.133596	0.0194452	-0.198827	0.0426657	-1.98	3.94	0.706195	0.929292
51–100	Recurrent	1	1	PELT	-0.588883	1.02518	-0.154382	0.0617166	-0.347629	0.138564	-2.73	7.73	0.595956	0.825496
51–100	Recurrent	1	1	PR	-0.103308	0.595954	-0.141706	0.0380394	-0.194039	0.0639551	-2.97	8.87	0.667479	0.870834
51–100	Recurrent	1	2	ARIMA	-0.131747	1.74587	-0.136636	0.0536715	-0.278462	0.119565	-2.68	7.4	0.644484	0.841525
51–100	Recurrent	1	2	FLSA	-0.552082	0.469683	-0.199619	0.0448325	-0.304918	0.100284	-1.2	2.52	0.694455	0.898134
51–100	Recurrent	1	2	GAM	0.0161294	0.607611	-0.131565	0.0363152	-0.197571	0.0588708	-2	4	0.728827	0.916739
51–100	Recurrent	1	2	LOWESS	0.178025	0.445147	-0.115996	0.0306906	-0.175897	0.04599	-1.96	3.88	0.742114	0.92789
51–100	Recurrent	1	2	MA	0.852996	1.17248	-0.151933	0.0246032	-0.214915	0.0503245	-1.98	3.94	0.699488	0.923839
51–100	Recurrent	1	2	PELT	-0.437365	1.1712	-0.120491	0.0620412	-0.329119	0.128742	-2.68	7.44	0.616462	0.834665
51–100	Recurrent	1	2	PR	-0.0874124	0.883133	-0.143506	0.040695	-0.203502	0.0659492	-2.95	8.79	0.664173	0.869627
51–100	Recurrent	2	0.33	ARIMA	0.503178	5.75954	-0.433556	0.598971	-0.395686	0.323704	-2.42	6.1	0.545087	0.668698
51–100	Recurrent	2	0.33	FLSA	-1.29553	2.03154	-0.866992	0.77137	-0.634091	0.423782	-0.98	2.2	0.424068	0.618225
51–100	Recurrent	2	0.33	GAM	0.00498339	2.02648	-0.584954	0.503714	-0.387888	0.216633	-2	4	0.555057	0.768301
51–100	Recurrent	2	0.33	LOWESS	0.369387	1.74565	-0.526982	0.405364	-0.344697	0.161407	-1.84	3.76	0.586476	0.816427
51–100	Recurrent	2	0.33	MA	1.13574	2.18178	-0.722636	0.527086	-0.480941	0.235489	-2	4	0.471224	0.753266
51–100	Recurrent	2	0.33	PELT	-1.79587	3.77163	-0.93497	0.913209	-0.803002	0.651474	-2.89	8.51	0.269288	0.421824
51–100	Recurrent	2	0.33	PR	-0.214537	1.55209	-0.610007	0.568354	-0.383169	0.224235	-2.89	8.59	0.502152	0.724753
51–100	Recurrent	2	0.66	ARIMA	0.710036	4.79431	-0.410665	0.485444	-0.339698	0.261532	-2.31	5.55	0.576643	0.723551
51–100	Recurrent	2	0.66	FLSA	-1.47585	2.4528	-0.903238	0.829769	-0.676812	0.477285	-1.22	2.78	0.38757	0.573817
51–100	Recurrent	2	0.66	GAM	-0.00988202	2.0047	-0.588755	0.50816	-0.398663	0.230763	-2	4	0.549427	0.758016
51–100	Recurrent	2	0.66	LOWESS	0.385148	1.49924	-0.534352	0.397352	-0.338543	0.149857	-1.77	3.67	0.591618	0.826244
51–100	Recurrent	2	0.66	MA	0.579042	1.10799	-0.772449	0.628884	-0.512344	0.274938	-1.98	3.98	0.461122	0.720291
51–100	Recurrent	2	0.66	PELT	-1.50829	3.494	-0.855996	0.825349	-0.746717	0.590849	-2.69	7.67	0.309965	0.46957
51–100	Recurrent	2	0.66	PR	0.0408146	2.67701	-0.543835	0.548753	-0.363332	0.222911	-2.62	7.6	0.539098	0.733238
51–100	Recurrent	2	1	ARIMA	0.716823	4.32533	-0.407721	0.450424	-0.323144	0.242103	-2.25	5.37	0.588003	0.741174
51–100	Recurrent	2	1	FLSA	-1.38691	2.1329	-0.890287	0.803486	-0.645877	0.433411	-0.89	1.89	0.417558	0.611519
51–100	Recurrent	2	1	GAM	0.122138	1.8956	-0.559383	0.468642	-0.377087	0.212992	-1.97	3.97	0.563665	0.773549
51–100	Recurrent	2	1	LOWESS	0.418371	1.36669	-0.534148	0.387409	-0.337638	0.147207	-1.82	3.7	0.588716	0.828736
51–100	Recurrent	2	1	MA	0.34582	0.80651	-0.79734	0.660394	-0.528144	0.291101	-1.99	4.01	0.454351	0.707124
51–100	Recurrent	2	1	PELT	-1.43615	3.07574	-0.786835	0.756208	-0.696987	0.543414	-2.61	7.29	0.341438	0.506634
51–100	Recurrent	2	1	PR	0.116953	2.56993	-0.522663	0.503276	-0.345754	0.211145	-2.48	7.04	0.556653	0.748597
51–100	Recurrent	2	2	ARIMA	0.710089	3.52234	-0.414754	0.408356	-0.305065	0.21337	-2.18	5.08	0.599262	0.767142
51–100	Recurrent	2	2	FLSA	-1.45919	2.28754	-0.906492	0.828538	-0.662937	0.453925	-0.99	2.15	0.402505	0.594068
51–100	Recurrent	2	2	GAM	0.343624	1.72331	-0.490352	0.375233	-0.317013	0.166029	-1.88	3.88	0.604168	0.814252
51–100	Recurrent	2	2	LOWESS	0.393116	1.2712	-0.536277	0.38257	-0.335896	0.14661	-1.82	3.68	0.589658	0.829764
51–100	Recurrent	2	2	MA	0.0489948	0.495143	-0.834707	0.700624	-0.552338	0.311974	-1.99	4.01	0.443844	0.690433
51–100	Recurrent	2	2	PELT	-1.27231	2.94013	-0.732509	0.699852	-0.66177	0.509276	-2.51	6.97	0.368783	0.534121
51–100	Recurrent	2	2	PR	0.189407	2.34151	-0.468683	0.455616	-0.316493	0.206679	-2.19	5.91	0.59393	0.763655
101–200	No change	0	0.33	ARIMA	1.65245	6.22684	0.165771	0.0840834	0.193102	0.087348	0.48	0.48	0.779025	0.915809
101–200	No change	0	0.33	FLSA	0.492395	0.463098	0.0746101	0.0198838	0.128657	0.0324199	1.73	4.39	0.782847	0.934207
101–200	No change	0	0.33	GAM	1.00887	1.56221	0.13572	0.0496595	0.239763	0.0876176	1.22	1.7	0.730094	0.912986
101–200	No change	0	0.33	LOWESS	1.00768	1.39822	0.12434	0.0347979	0.236279	0.0808574	1.35	2.25	0.726598	0.914671
101–200	No change	0	0.33	MA	3.91625	16.0615	0.214638	0.0481867	0.266145	0.0734865	1	1	0.648432	0.913654
101–200	No change	0	0.33	PELT	1.70196	14.548	0.426558	0.903511	0.123807	0.0544815	0.51	0.97	0.765791	0.866613
101–200	No change	0	0.33	PR	1.65929	7.81417	0.287443	0.332085	0.26686	0.132908	0.4	0.92	0.719429	0.858561
101–200	No change	0	0.66	ARIMA	2.13184	8.12232	0.19213	0.077516	0.227053	0.0924857	0.6	0.6	0.736589	0.909277
101–200	No change	0	0.66	FLSA	0.503115	0.509603	0.0680005	0.0155749	0.1248	0.0262593	1.82	4.54	0.780286	0.937686
101–200	No change	0	0.66	GAM	0.93462	1.33546	0.110459	0.0335455	0.216955	0.0702479	1.24	1.76	0.74783	0.926991
101–200	No change	0	0.66	LOWESS	0.952946	1.25131	0.105679	0.0256965	0.215723	0.066996	1.12	1.36	0.756029	0.93356
101–200	No change	0	0.66	MA	3.43009	12.3464	0.154653	0.0248888	0.224006	0.0520313	1	1	0.692739	0.935759
101–200	No change	0	0.66	PELT	4.7238	41.1571	0.958675	1.76706	0.220359	0.0823846	1.36	3.1	0.515521	0.741694
101–200	No change	0	0.66	PR	2.60404	15.1814	0.47223	0.560266	0.307127	0.16381	0.87	2.01	0.620244	0.803801
101–200	No change	0	1	ARIMA	2.58824	9.67106	0.221515	0.0820025	0.26354	0.0998989	0.74	0.74	0.692616	0.900452
101–200	No change	0	1	FLSA	0.42596	0.346116	0.0489676	0.00779711	0.106398	0.019954	1.66	4.06	0.805974	0.94739
101–200	No change	0	1	GAM	0.89754	1.23565	0.100168	0.0276678	0.206898	0.063486	1.26	1.82	0.75497	0.932116
101–200	No change	0	1	LOWESS	0.925134	1.18061	0.0972004	0.0216499	0.208248	0.0622394	1.07	1.21	0.765382	0.938835
101–200	No change	0	1	MA	3.16868	10.583	0.130039	0.017632	0.205036	0.0434106	1	1	0.713582	0.944805
101–200	No change	0	1	PELT	6.66084	56.969	1.26524	2.16267	0.284294	0.102449	2.08	5.24	0.376754	0.670734
101–200	No change	0	1	PR	3.12398	18.2723	0.526015	0.575783	0.347969	0.183838	1.12	2.54	0.567314	0.781075
101–200	No change	0	2	ARIMA	2.88832	10.9132	0.245266	0.0893007	0.279987	0.103146	0.8	0.8	0.669439	0.8956
101–200	No change	0	2	FLSA	0.515138	0.426599	0.0576431	0.00798856	0.126856	0.0238958	1.97	5.03	0.771479	0.935731
101–200	No change	0	2	GAM	0.823166	1.02527	0.0829315	0.0188246	0.191314	0.0531963	1.31	2.03	0.765548	0.938936
101–200	No change	0	2	LOWESS	0.894746	1.09675	0.0879476	0.0175681	0.200062	0.0563313	1.12	1.4	0.769445	0.942062
101–200	No change	0	2	MA	2.90062	8.85183	0.109849	0.012541	0.185253	0.0352722	1	1	0.734451	0.953294
101–200	No change	0	2	PELT	7.43581	62.1533	1.40768	2.32665	0.344353	0.131134	2.73	8.15	0.29809	0.616328
101–200	No change	0	2	PR	3.13994	17.5182	0.511956	0.553091	0.344478	0.175355	1.17	2.61	0.568452	0.788901
101–200	Jump	0.25	0.33	ARIMA	0.729313	3.03001	0.0960999	0.05407	0.0662963	0.0501627	-0.7	0.7	0.874315	0.947932
101–200	Jump	0.25	0.33	FLSA	0.343031	0.417901	0.0536652	0.00871077	0.0709648	0.0163545	0.91	2.07	0.875716	0.967743
101–200	Jump	0.25	0.33	GAM	0.631727	0.845329	0.0848258	0.0247526	0.147084	0.046954	0.01	0.01	0.875052	0.961052
101–200	Jump	0.25	0.33	LOWESS	0.874403	1.06638	0.108366	0.0258582	0.191012	0.0542113	0.09	0.25	0.832917	0.953075
101–200	Jump	0.25	0.33	MA	3.41598	12.7808	0.205241	0.0486543	0.208688	0.0486219	0	0	0.747586	0.944707
101–200	Jump	0.25	0.33	PELT	1.31883	11.3321	0.242183	0.325309	0.018783	0.0251348	-0.54	1	0.867888	0.934424
101–200	Jump	0.25	0.33	PR	0.582595	1.59184	0.0846819	0.042428	0.129624	0.0449891	-0.97	1.03	0.82634	0.951451
101–200	Jump	0.25	0.66	ARIMA	0.512199	2.16593	0.0602336	0.0258188	0.0329344	0.0319506	-0.75	0.75	0.903024	0.964441
101–200	Jump	0.25	0.66	FLSA	0.222326	0.330163	0.0278005	0.0036496	0.030206	0.00631531	0.79	1.85	0.915746	0.977779
101–200	Jump	0.25	0.66	GAM	0.430178	0.479742	0.0473289	0.00951212	0.09963	0.0260248	0.02	0.02	0.916057	0.978577
101–200	Jump	0.25	0.66	LOWESS	0.641389	0.630777	0.0635994	0.0096786	0.133692	0.0292962	0.04	0.04	0.885297	0.975709
101–200	Jump	0.25	0.66	MA	2.901	9.26001	0.136225	0.0219685	0.153844	0.0264923	0	0	0.805327	0.967598
101–200	Jump	0.25	0.66	PELT	4.59266	30.5343	0.643057	0.625671	0.148637	0.0468129	0.53	1.27	0.649416	0.873305
101–200	Jump	0.25	0.66	PR	0.426722	0.967347	0.0488599	0.0154343	0.0925956	0.0248432	-0.97	1.03	0.858366	0.969489
101–200	Jump	0.25	1	ARIMA	0.255608	1.34611	0.0328109	0.0134599	0.00159094	0.0206919	-0.82	0.82	0.928504	0.974248
101–200	Jump	0.25	1	FLSA	0.261207	0.213367	0.0287298	0.00273084	0.039271	0.00601295	1.19	2.35	0.882255	0.973687
101–200	Jump	0.25	1	GAM	0.331048	0.330772	0.033202	0.00557411	0.0793345	0.0188601	0	0	0.935284	0.984722
101–200	Jump	0.25	1	LOWESS	0.555919	0.480713	0.0480059	0.00573482	0.11253	0.020947	0.07	0.11	0.901614	0.981957
101–200	Jump	0.25	1	MA	2.68033	7.95359	0.112129	0.015068	0.132712	0.0196453	0	0	0.828047	0.974838
101–200	Jump	0.25	1	PELT	5.90405	36.6188	0.759087	0.656099	0.192728	0.0478872	1.15	1.81	0.549191	0.859385
101–200	Jump	0.25	1	PR	0.476828	1.7786	0.0543345	0.0337871	0.0824954	0.0232011	-0.93	1.05	0.864474	0.968242
101–200	Jump	0.25	2	ARIMA	0.132028	0.982607	0.01671	0.00651397	-0.0167751	0.0138491	-0.86	0.86	0.923341	0.980041
101–200	Jump	0.25	2	FLSA	0.134576	0.153107	0.0133313	0.00108977	0.00889205	0.0028727	0.86	1.92	0.928611	0.980137
101–200	Jump	0.25	2	GAM	0.23767	0.201286	0.0203835	0.00254645	0.0597115	0.0124352	0	0	0.952472	0.990032
101–200	Jump	0.25	2	LOWESS	0.440731	0.344571	0.0320308	0.00311598	0.0839375	0.0130217	0.07	0.19	0.925322	0.987669
101–200	Jump	0.25	2	MA	2.38321	6.36056	0.0880324	0.00930609	0.110687	0.01339	0	0	0.853425	0.981864
101–200	Jump	0.25	2	PELT	6.07037	37.1618	0.774984	0.648297	0.204963	0.0498731	1.35	2.21	0.527734	0.854618
101–200	Jump	0.25	2	PR	0.421542	1.43641	0.0426312	0.0228937	0.0664502	0.0170694	-0.92	1.04	0.878096	0.974204
101–200	Jump	0.5	0.33	ARIMA	0.712272	3.32547	0.11584	0.0892814	0.0527842	0.0667971	-0.63	0.63	0.883072	0.932955
101–200	Jump	0.5	0.33	FLSA	0.109853	0.307686	0.0314562	0.00865123	0.0140056	0.0122098	0.93	2.07	0.917454	0.970988
101–200	Jump	0.5	0.33	GAM	0.588072	0.84234	0.0881765	0.0349634	0.133114	0.0468045	0.01	0.01	0.884012	0.960396
101–200	Jump	0.5	0.33	LOWESS	0.782656	0.94928	0.104954	0.0329146	0.161361	0.0456129	0.18	0.46	0.848227	0.957403
101–200	Jump	0.5	0.33	MA	3.17535	11.2967	0.183606	0.0416973	0.161659	0.0325987	0	0	0.785302	0.959144
101–200	Jump	0.5	0.33	PELT	1.07681	10.7711	0.218333	0.333141	-0.0334554	0.0312066	-0.54	1	0.870181	0.929939
101–200	Jump	0.5	0.33	PR	0.39139	0.673351	0.0660016	0.0322169	0.102637	0.0438754	-1	1	0.848011	0.954352
101–200	Jump	0.5	0.66	ARIMA	0.345676	2.18686	0.0507927	0.0403085	-0.00688425	0.0415579	-0.72	0.72	0.926265	0.956272
101–200	Jump	0.5	0.66	FLSA	0.091438	0.311152	0.0171261	0.0063951	-0.00376172	0.00726642	1.08	2.24	0.916515	0.973345
101–200	Jump	0.5	0.66	GAM	0.40378	0.503522	0.0459568	0.0142769	0.089426	0.0277745	0.07	0.07	0.920022	0.976398
101–200	Jump	0.5	0.66	LOWESS	0.575346	0.550087	0.0573371	0.0122704	0.112407	0.0251147	0.13	0.17	0.895491	0.977648
101–200	Jump	0.5	0.66	MA	2.73268	8.32444	0.111913	0.016293	0.111772	0.0164848	0	0	0.839502	0.97675
101–200	Jump	0.5	0.66	PELT	4.22381	27.7073	0.614616	0.615468	0.109433	0.0431654	0.49	1.27	0.684662	0.879666
101–200	Jump	0.5	0.66	PR	0.283902	0.408851	0.0341543	0.0134723	0.0755247	0.0267725	-1	1	0.872593	0.969062
101–200	Jump	0.5	1	ARIMA	0.173443	1.75395	0.0265208	0.0266394	-0.0322888	0.0332147	-0.77	0.77	0.917337	0.963698
101–200	Jump	0.5	1	FLSA	0.0313644	0.252968	0.00802462	0.00437138	-0.0195369	0.00664312	0.95	2.09	0.919815	0.975391
101–200	Jump	0.5	1	GAM	0.331866	0.380922	0.0309022	0.00876425	0.0738448	0.021352	0.04	0.04	0.936492	0.98215
101–200	Jump	0.5	1	LOWESS	0.495758	0.459937	0.0419042	0.00820065	0.0920937	0.0182468	0.16	0.26	0.911055	0.982516
101–200	Jump	0.5	1	MA	2.52888	7.08729	0.0839517	0.00965419	0.0897734	0.0108891	0	0	0.863336	0.98294
101–200	Jump	0.5	1	PELT	5.49367	32.8566	0.727363	0.631612	0.160449	0.0396113	1.12	1.8	0.5791	0.871121
101–200	Jump	0.5	1	PR	0.315606	0.74992	0.0297009	0.012281	0.0688165	0.0211133	-0.97	1.03	0.878617	0.972807
101–200	Jump	0.5	2	ARIMA	0.0885732	1.37996	0.00914333	0.0149209	-0.0448496	0.0262604	-0.77	0.79	0.915718	0.970127
101–200	Jump	0.5	2	FLSA	0.0318194	0.188763	0.00357383	0.00290553	-0.022118	0.00569203	0.91	1.95	0.922022	0.977559
101–200	Jump	0.5	2	GAM	0.257384	0.233932	0.015528	0.00426119	0.061585	0.0142612	0.03	0.03	0.949826	0.988191
101–200	Jump	0.5	2	LOWESS	0.376276	0.318612	0.0224186	0.00418009	0.0672958	0.0119429	0.09	0.21	0.937863	0.988261
101–200	Jump	0.5	2	MA	2.14922	5.16028	0.0505593	0.0040695	0.0657753	0.00601046	0	0	0.894145	0.989278
101–200	Jump	0.5	2	PELT	5.82123	34.2088	0.756403	0.625728	0.180053	0.0415968	1.37	2.29	0.545804	0.864573
101–200	Jump	0.5	2	PR	0.429512	2.09484	0.035902	0.0309016	0.0635458	0.0158786	-0.93	1.05	0.880323	0.973666
101–200	Jump	1	0.33	ARIMA	1.16519	4.78883	0.199446	0.223364	0.106571	0.111153	-0.25	0.75	0.848543	0.887142
101–200	Jump	1	0.33	FLSA	-0.224866	0.51359	-0.041916	0.0411599	-0.0636782	0.0290177	0.94	1.98	0.883163	0.956413
101–200	Jump	1	0.33	GAM	0.698362	1.02834	0.0852277	0.0614413	0.13959	0.0515417	0.04	0.06	0.876005	0.954128
101–200	Jump	1	0.33	LOWESS	0.695661	0.864808	0.0761511	0.0489921	0.136	0.0443488	0.38	1.36	0.858737	0.949351
101–200	Jump	1	0.33	MA	2.56943	7.50479	0.0629885	0.0139617	0.078538	0.015623	0	0	0.873262	0.978509
101–200	Jump	1	0.33	PELT	0.934194	10.732	0.228766	0.475213	-0.0821838	0.0640404	-0.4	0.94	0.852691	0.89569
101–200	Jump	1	0.33	PR	0.490732	2.43109	0.0507417	0.0970394	0.0947688	0.0563563	-0.94	1.06	0.857175	0.937549
101–200	Jump	1	0.66	ARIMA	1.0556	3.82783	0.136049	0.127149	0.0820023	0.0811913	-0.12	0.88	0.886732	0.916592
101–200	Jump	1	0.66	FLSA	-0.235036	0.455439	-0.0650548	0.0235019	-0.0793864	0.0208615	1.01	2.27	0.864459	0.961379
101–200	Jump	1	0.66	GAM	0.576623	0.649272	0.0344651	0.0267852	0.106368	0.0307877	0	0	0.912096	0.973586
101–200	Jump	1	0.66	LOWESS	0.581048	0.621394	0.029219	0.0218518	0.101234	0.0264595	0.2	0.28	0.903339	0.974822
101–200	Jump	1	0.66	MA	2.00056	4.64264	-0.0164414	0.0050205	0.0323568	0.00722868	0	0	0.925431	0.98885
101–200	Jump	1	0.66	PELT	3.90008	23.9184	0.574394	0.600176	0.057308	0.0414884	0.59	1.21	0.720092	0.88652
101–200	Jump	1	0.66	PR	0.293625	0.472599	-0.00989313	0.0277682	0.0818723	0.0316705	-1	1	0.873732	0.964174
101–200	Jump	1	1	ARIMA	1.10968	3.63292	0.122578	0.0970368	0.0867241	0.0697671	-0.07	0.79	0.888494	0.92842
101–200	Jump	1	1	FLSA	-0.210213	0.342366	-0.065679	0.0198935	-0.0743179	0.0172658	1.1	2.32	0.861837	0.964033
101–200	Jump	1	1	GAM	0.524306	0.508461	0.0156423	0.0170497	0.093757	0.0235326	0.03	0.03	0.923105	0.979784
101–200	Jump	1	1	LOWESS	0.519012	0.531393	0.0109519	0.0153103	0.0857924	0.020006	0.2	0.28	0.918052	0.980361
101–200	Jump	1	1	MA	1.76369	3.63581	-0.0443414	0.00506865	0.0138272	0.00503314	0.02	0.02	0.935834	0.99148
101–200	Jump	1	1	PELT	5.0315	27.8446	0.670166	0.579384	0.10155	0.0291267	1.11	1.77	0.626755	0.888038
101–200	Jump	1	1	PR	0.338976	0.844753	-0.0107391	0.0399778	0.0818453	0.0269469	-0.97	1.03	0.874469	0.966139
101–200	Jump	1	2	ARIMA	1.2653	3.63794	0.131618	0.0715832	0.111912	0.059941	0.12	1.18	0.864545	0.93438
101–200	Jump	1	2	FLSA	-0.277417	0.450987	-0.0719022	0.0216566	-0.09061	0.0232906	0.9	2.06	0.862859	0.961576
101–200	Jump	1	2	GAM	0.454536	0.349279	-0.0046448	0.00880469	0.081718	0.0162861	0.12	0.12	0.928702	0.985349
101–200	Jump	1	2	LOWESS	0.409371	0.37489	-0.0123473	0.00907413	0.0698997	0.0132635	0.34	0.42	0.921	0.984918
101–200	Jump	1	2	MA	1.5102	2.74336	-0.0691869	0.0064828	-0.00252757	0.00287961	0.05	0.05	0.941945	0.993751
101–200	Jump	1	2	PELT	5.32184	28.7391	0.695466	0.557396	0.128728	0.0294026	1.4	2.4	0.587656	0.883122
101–200	Jump	1	2	PR	0.336117	0.674218	-0.027273	0.0147853	0.0774152	0.0167344	-0.97	1.03	0.873678	0.976023
101–200	Jump	2	0.33	ARIMA	2.6822	7.99606	0.585893	0.601747	0.375858	0.166537	0.33	1.01	0.591716	0.814427
101–200	Jump	2	0.33	FLSA	-0.830162	1.55868	-0.416707	0.320996	-0.203888	0.0841814	1	2.02	0.714444	0.892933
101–200	Jump	2	0.33	GAM	1.17467	1.79117	0.0575425	0.135119	0.169979	0.055897	0	0	0.853258	0.944937
101–200	Jump	2	0.33	LOWESS	0.890863	1.25546	-0.0275285	0.121628	0.143615	0.051636	0.13	0.13	0.87441	0.948653
101–200	Jump	2	0.33	MA	1.33159	2.41031	-0.389691	0.185548	-0.0559783	0.0232387	0.24	0.28	0.835892	0.962671
101–200	Jump	2	0.33	PELT	0.545802	5.89126	0.185658	0.664089	-0.107122	0.0964784	-0.09	0.59	0.876119	0.866385
101–200	Jump	2	0.33	PR	1.20592	3.61589	0.0735284	0.293407	0.178676	0.0734086	-0.43	0.67	0.81835	0.912195
101–200	Jump	2	0.66	ARIMA	2.24754	5.46605	0.417422	0.31324	0.315539	0.112667	0.28	0.9	0.663191	0.877615
101–200	Jump	2	0.66	FLSA	-1.11919	1.90916	-0.526211	0.359898	-0.279766	0.110191	0.79	1.79	0.661159	0.872579
101–200	Jump	2	0.66	GAM	1.08243	1.44026	-0.011318	0.0674442	0.131267	0.0326042	0	0	0.88842	0.968196
101–200	Jump	2	0.66	LOWESS	0.821073	1.10889	-0.0734638	0.08139	0.113343	0.0310308	0.16	0.16	0.883665	0.96728
101–200	Jump	2	0.66	MA	0.787826	1.08359	-0.456024	0.225154	-0.0802127	0.0189737	0.32	0.34	0.81607	0.963749
101–200	Jump	2	0.66	PELT	2.78928	13.254	0.4414	0.523487	0.0144334	0.0305042	0.88	1.38	0.77416	0.91005
101–200	Jump	2	0.66	PR	1.28939	3.34903	0.056523	0.137851	0.150124	0.0427944	-0.23	0.49	0.848738	0.948661
101–200	Jump	2	1	ARIMA	2.03167	4.41754	0.347145	0.215847	0.287347	0.0910931	0.56	2.12	0.680518	0.891603
101–200	Jump	2	1	FLSA	-0.975161	1.64461	-0.486518	0.320805	-0.253658	0.0946832	1	2.08	0.672826	0.884642
101–200	Jump	2	1	GAM	1.04601	1.32101	-0.037746	0.0482298	0.114554	0.0238496	0	0	0.894495	0.976494
101–200	Jump	2	1	LOWESS	0.803601	1.04989	-0.08887	0.0656975	0.103338	0.0233422	0.21	0.21	0.883868	0.973966
101–200	Jump	2	1	MA	0.55424	0.670511	-0.476189	0.23794	-0.0860115	0.0163735	0.4	0.48	0.808799	0.96391
101–200	Jump	2	1	PELT	3.51824	15.6834	0.504144	0.469404	0.0386558	0.0236208	1.38	2.62	0.702659	0.905709
101–200	Jump	2	1	PR	1.19498	2.59823	0.0164482	0.0948121	0.127699	0.0313663	-0.23	0.47	0.872474	0.961599
101–200	Jump	2	2	ARIMA	1.83614	3.55198	0.27979	0.139193	0.2608	0.07364	0.57	1.31	0.710696	0.918027
101–200	Jump	2	2	FLSA	-0.946871	1.63938	-0.475574	0.316143	-0.252228	0.0952845	0.96	2	0.678408	0.885218
101–200	Jump	2	2	GAM	1.00296	1.19407	-0.066419	0.0317656	0.0953275	0.0147204	0	0	0.901698	0.984895
101–200	Jump	2	2	LOWESS	0.821191	1.02596	-0.0966379	0.0488991	0.0918361	0.0160792	0.24	0.24	0.886848	0.980562
101–200	Jump	2	2	MA	0.33433	0.374863	-0.484194	0.237854	-0.0829059	0.0105156	0.5	0.58	0.807132	0.967732
101–200	Jump	2	2	PELT	3.83051	16.5799	0.58209	0.471718	0.0919878	0.0241351	1.86	4.26	0.627226	0.889873
101–200	Jump	2	2	PR	1.06732	1.74261	-0.0216175	0.0739196	0.110222	0.0253366	-0.25	0.39	0.884048	0.969441
101–200	Linear	0.25	0.33	ARIMA	-0.0301932	0.462593	0.00648336	0.003247	-0.0584552	0.0131728	-1.9	3.7	0.833711	0.955863
101–200	Linear	0.25	0.33	FLSA	0.051268	0.0523377	0.00587918	0.000321747	-0.012031	0.00270585	0	1.2	0.989921	0.986961
101–200	Linear	0.25	0.33	GAM	0.100695	0.0424682	0.00140674	0.000139706	-0.00232845	0.00207871	-1	1	0.92612	0.989277
101–200	Linear	0.25	0.33	LOWESS	0.141361	0.0478904	0.00388331	0.000142419	0.00351068	0.00157544	-0.77	0.81	0.939899	0.991377
101–200	Linear	0.25	0.33	MA	4.11941	17.724	0.207962	0.0472307	0.139152	0.0198625	-1	1	0.714863	0.95251
101–200	Linear	0.25	0.33	PELT	-0.24864	0.0630496	-0.011787	0.000141954	-0.0899987	0.00823741	-1.98	3.96	0.805546	0.957852
101–200	Linear	0.25	0.33	PR	0.100695	0.0424673	0.00140673	0.000139706	-0.00232848	0.00207873	-2	4	0.856569	0.962068
101–200	Linear	0.25	0.66	ARIMA	-0.146939	0.198903	-0.00472236	0.000843894	-0.0752867	0.00964063	-1.94	3.82	0.819771	0.957874
101–200	Linear	0.25	0.66	FLSA	-0.0190391	0.0387741	0.000317858	0.000166942	-0.0257103	0.00327296	-0.17	1.43	0.971761	0.984474
101–200	Linear	0.25	0.66	GAM	0.0725976	0.0318057	-0.000711851	8.65758e-05	-0.00940597	0.00178893	-1	1	0.922841	0.989513
101–200	Linear	0.25	0.66	LOWESS	0.102495	0.031571	0.00148245	8.41258e-05	-0.00206962	0.00128684	-0.68	0.84	0.94847	0.991347
101–200	Linear	0.25	0.66	MA	3.66707	13.9919	0.160481	0.0283088	0.108541	0.0121293	-1	1	0.750679	0.963957
101–200	Linear	0.25	0.66	PELT	-0.248291	0.0631597	-0.0118603	0.000141688	-0.0902541	0.00823114	-1.98	3.96	0.805402	0.957857
101–200	Linear	0.25	0.66	PR	0.0725992	0.0318057	-0.000711852	8.65758e-05	-0.00940618	0.00178894	-2	4	0.853547	0.962298
101–200	Linear	0.25	1	ARIMA	-0.214433	0.0970863	-0.00916741	0.000431736	-0.0842448	0.00885487	-1.97	3.91	0.810574	0.957787
101–200	Linear	0.25	1	FLSA	5.50902e-05	0.0292804	0.000249241	0.000108941	-0.0193106	0.00231935	0.18	1.14	0.975502	0.987841
101–200	Linear	0.25	1	GAM	0.0643364	0.0271864	-0.00146213	7.19627e-05	-0.0114874	0.00160814	-1	1	0.921669	0.989657
101–200	Linear	0.25	1	LOWESS	0.0863457	0.0242295	0.000585833	6.91683e-05	-0.00423428	0.00116044	-0.7	0.78	0.946385	0.991997
101–200	Linear	0.25	1	MA	3.45463	12.4378	0.14551	0.0235183	0.0975724	0.00983873	-1	1	0.764441	0.967788
101–200	Linear	0.25	1	PELT	-0.245883	0.0643617	-0.0119148	0.000142179	-0.0910046	0.00828493	-1.98	3.96	0.805042	0.957816
101–200	Linear	0.25	1	PR	0.0643411	0.0271858	-0.00146213	7.19627e-05	-0.0114879	0.00160818	-2	4	0.85245	0.962438
101–200	Linear	0.25	2	ARIMA	-0.237025	0.0787567	-0.0107317	0.000264958	-0.0883217	0.00861085	-1.99	3.97	0.806259	0.957459
101–200	Linear	0.25	2	FLSA	-0.0579097	0.0266536	-0.00312272	7.68201e-05	-0.030299	0.00286446	-0.15	1.25	0.968722	0.986436
101–200	Linear	0.25	2	GAM	0.0579117	0.0214946	-0.00222612	5.86831e-05	-0.0131082	0.00133238	-1	1	0.920716	0.989874
101–200	Linear	0.25	2	LOWESS	0.0741872	0.019988	-3.27944e-05	5.89289e-05	-0.00562375	0.00103734	-0.69	0.73	0.946673	0.992551
101–200	Linear	0.25	2	MA	3.2139	10.8369	0.130164	0.0191988	0.0860228	0.00770846	-1	1	0.779333	0.971516
101–200	Linear	0.25	2	PELT	-0.230092	0.0700854	-0.0107763	0.000234808	-0.089445	0.00816643	-1.94	3.88	0.809078	0.958612
101–200	Linear	0.25	2	PR	0.057918	0.0214948	-0.00222613	5.86832e-05	-0.0131088	0.00133241	-2	4	0.851557	0.962649
101–200	Linear	0.5	0.33	ARIMA	-0.409748	0.394852	-0.0407562	0.00305603	-0.169944	0.0328337	-1.96	3.88	0.75486	0.93978
101–200	Linear	0.5	0.33	FLSA	-0.13024	0.096355	-0.0144989	0.0011088	-0.0604589	0.0108001	-0.13	1.25	0.947271	0.980256
101–200	Linear	0.5	0.33	GAM	0.110034	0.0822708	-0.00971953	0.000754457	-0.0276814	0.00524911	-1	1	0.909431	0.986773
101–200	Linear	0.5	0.33	LOWESS	0.136052	0.0735315	-0.00511868	0.000586882	-0.0156587	0.00357232	-0.8	0.86	0.930541	0.989339
101–200	Linear	0.5	0.33	MA	3.67374	14.4128	0.162902	0.03073	0.0600651	0.00405422	-1	1	0.777078	0.96943
101–200	Linear	0.5	0.33	PELT	-0.50004	0.251865	-0.0473904	0.00226646	-0.180428	0.0329223	-1.98	3.96	0.744818	0.939221
101–200	Linear	0.5	0.33	PR	0.109914	0.0823751	-0.00972509	0.000754972	-0.0277132	0.00525828	-2	4	0.840983	0.959625
101–200	Linear	0.5	0.66	ARIMA	-0.483608	0.276073	-0.0467867	0.00230033	-0.180045	0.0329494	-1.99	3.97	0.744883	0.939084
101–200	Linear	0.5	0.66	FLSA	-0.158299	0.0874636	-0.0196518	0.000985763	-0.0671823	0.0106352	-0.08	1.18	0.944681	0.981032
101–200	Linear	0.5	0.66	GAM	0.107415	0.0662162	-0.0113148	0.000590506	-0.0282734	0.00427293	-1	1	0.908808	0.987546
101–200	Linear	0.5	0.66	LOWESS	0.125122	0.0583104	-0.00704503	0.00044135	-0.0151149	0.00263895	-0.81	0.89	0.930016	0.989806
101–200	Linear	0.5	0.66	MA	3.20947	11.1028	0.114563	0.0162381	0.0328837	0.00151668	-1	1	0.81234	0.976153
101–200	Linear	0.5	0.66	PELT	-0.504338	0.254379	-0.0478464	0.00228928	-0.18235	0.0332525	-2	4	0.742399	0.938619
101–200	Linear	0.5	0.66	PR	0.107633	0.066122	-0.0113178	0.000590752	-0.0282929	0.00427719	-2	4	0.840381	0.960382
101–200	Linear	0.5	1	ARIMA	-0.504338	0.254379	-0.0478464	0.00228928	-0.18235	0.0332525	-2	4	0.742399	0.938619
101–200	Linear	0.5	1	FLSA	-0.210814	0.0950559	-0.0237282	0.0010802	-0.0770265	0.0120672	-0.25	1.41	0.925199	0.977859
101–200	Linear	0.5	1	GAM	0.108863	0.0588351	-0.0118289	0.0005263	-0.0279382	0.00376657	-1	1	0.908857	0.987944
101–200	Linear	0.5	1	LOWESS	0.119388	0.0533065	-0.00769086	0.000395196	-0.01496	0.00232253	-0.77	0.99	0.932864	0.98915
101–200	Linear	0.5	1	MA	2.95233	9.48023	0.0978974	0.012541	0.0237394	0.00104751	-1	1	0.826763	0.978599
101–200	Linear	0.5	1	PELT	-0.498052	0.251961	-0.0477832	0.00228363	-0.182134	0.0331783	-1.98	3.96	0.743882	0.93903
101–200	Linear	0.5	1	PR	0.109001	0.0587927	-0.0118299	0.000526377	-0.0279505	0.00376889	-2	4	0.840424	0.96077
101–200	Linear	0.5	2	ARIMA	-0.504338	0.254379	-0.0478464	0.00228928	-0.18235	0.0332525	-2	4	0.742399	0.938619
101–200	Linear	0.5	2	FLSA	-0.190268	0.0838159	-0.0227433	0.000958956	-0.0695008	0.0101715	-0.1	1.18	0.940468	0.98139
101–200	Linear	0.5	2	GAM	0.114078	0.0482953	-0.0122918	0.000453029	-0.0266652	0.00295516	-1	1	0.909369	0.988579
101–200	Linear	0.5	2	LOWESS	0.121757	0.0444179	-0.00797897	0.000324525	-0.0133544	0.00170785	-0.79	0.83	0.932308	0.991084
101–200	Linear	0.5	2	MA	2.7479	8.23716	0.0837662	0.00960971	0.015291	0.000817616	-1	1	0.83914	0.980383
101–200	Linear	0.5	2	PELT	-0.450935	0.263658	-0.0455041	0.00229602	-0.177519	0.0321392	-1.9	3.8	0.752696	0.941203
101–200	Linear	0.5	2	PR	0.114104	0.0482933	-0.0122918	0.000453029	-0.0266676	0.00295547	-2	4	0.840898	0.961389
101–200	Linear	1	0.33	ARIMA	0.479921	2.71587	-0.0199629	0.125811	-0.12644	0.073738	-1.36	2.24	0.818704	0.911916
101–200	Linear	1	0.33	FLSA	-0.423998	0.341345	-0.102429	0.0163432	-0.14955	0.0404533	-0.01	1.15	0.875284	0.957205
101–200	Linear	1	0.33	GAM	0.264845	0.155394	-0.0440572	0.00517712	-0.0417388	0.00689341	-0.97	1.03	0.892376	0.984824
101–200	Linear	1	0.33	LOWESS	0.271491	0.154629	-0.0319871	0.00389167	-0.0269103	0.00478759	-0.87	0.89	0.910143	0.987793
101–200	Linear	1	0.33	MA	2.80817	9.00292	0.0487534	0.00546314	-0.0277315	0.0035394	-1	1	0.837676	0.977786
101–200	Linear	1	0.33	PELT	-0.988427	0.998506	-0.187193	0.035988	-0.35734	0.13036	-1.96	3.92	0.618389	0.864277
101–200	Linear	1	0.33	PR	0.265934	0.158292	-0.0456558	0.0055295	-0.0438333	0.00752129	-2	4	0.821333	0.957496
101–200	Linear	1	0.66	ARIMA	0.592216	1.74369	-0.02082	0.0600477	-0.0753673	0.0424758	-1.08	1.68	0.862927	0.946148
101–200	Linear	1	0.66	FLSA	-0.443895	0.312785	-0.107577	0.0161919	-0.145943	0.0366854	0.07	0.99	0.872205	0.961519
101–200	Linear	1	0.66	GAM	0.268876	0.130671	-0.0442598	0.00411135	-0.0387636	0.00472746	-0.95	1.03	0.895301	0.986581
101–200	Linear	1	0.66	LOWESS	0.274007	0.130974	-0.0328651	0.00299526	-0.0239298	0.00316366	-0.82	0.98	0.91504	0.98831
101–200	Linear	1	0.66	MA	2.49231	7.06755	0.0240439	0.00211622	-0.0216902	0.00221532	-1	1	0.853554	0.981205
101–200	Linear	1	0.66	PELT	-1.00291	1.00931	-0.191199	0.0365605	-0.36422	0.132681	-1.98	3.96	0.612862	0.862186
101–200	Linear	1	0.66	PR	0.275097	0.133702	-0.0461967	0.00450184	-0.0415296	0.00543254	-2	4	0.822239	0.959148
101–200	Linear	1	1	ARIMA	0.512401	0.951362	-0.044644	0.00884558	-0.0702796	0.0270028	-0.98	1.54	0.86937	0.963842
101–200	Linear	1	1	FLSA	-0.508581	0.406787	-0.115396	0.0186322	-0.170094	0.0493297	-0.11	1.47	0.852018	0.947431
101–200	Linear	1	1	GAM	0.270058	0.122004	-0.0443663	0.00374373	-0.0378737	0.00406401	-0.96	1	0.895085	0.987396
101–200	Linear	1	1	LOWESS	0.277766	0.123733	-0.0330541	0.00267358	-0.022995	0.00265827	-0.9	0.92	0.909987	0.989272
101–200	Linear	1	1	MA	2.30417	5.9836	0.0143849	0.00125416	-0.0201222	0.0018242	-1	1	0.860869	0.982775
101–200	Linear	1	1	PELT	-0.99291	0.998757	-0.188992	0.0362227	-0.359752	0.131542	-1.97	3.93	0.61624	0.863306
101–200	Linear	1	1	PR	0.279247	0.125021	-0.0462325	0.00409036	-0.0404863	0.00464231	-2	4	0.822693	0.959774
101–200	Linear	1	2	ARIMA	0.551558	1.20087	-0.0159811	0.0555827	-0.0451349	0.0272061	-0.98	1.4	0.888907	0.961061
101–200	Linear	1	2	FLSA	-0.532656	0.41379	-0.119966	0.0193211	-0.173625	0.0483387	-0.2	1.14	0.842897	0.951006
101–200	Linear	1	2	GAM	0.271978	0.112875	-0.0445236	0.00336738	-0.0370315	0.00340681	-1	1	0.892781	0.987935
101–200	Linear	1	2	LOWESS	0.281992	0.115149	-0.0328456	0.00227072	-0.0214452	0.00203678	-0.93	0.93	0.908777	0.989695
101–200	Linear	1	2	MA	2.07825	4.85741	0.00373929	0.000733612	-0.0214878	0.00193759	-1	1	0.867608	0.983982
101–200	Linear	1	2	PELT	-0.936577	1.04811	-0.184931	0.0357058	-0.354169	0.128978	-1.92	3.84	0.623587	0.865917
101–200	Linear	1	2	PR	0.284511	0.116212	-0.0460902	0.00362126	-0.0391629	0.0037797	-2	4	0.82331	0.960458
101–200	Linear	2	0.33	ARIMA	1.44166	2.58304	0.0367018	0.0240971	0.058028	0.00849453	-0.65	1.07	0.877516	0.979075
101–200	Linear	2	0.33	FLSA	-1.16239	1.66549	-0.538764	0.335359	-0.382273	0.196568	-0.07	1.11	0.642112	0.816371
101–200	Linear	2	0.33	GAM	0.506343	0.380261	-0.139478	0.0306617	-0.0479155	0.00551857	-0.88	0.92	0.869106	0.984618
101–200	Linear	2	0.33	LOWESS	0.548924	0.413669	-0.121981	0.0281908	-0.0413529	0.00562611	-0.84	0.94	0.878199	0.984512
101–200	Linear	2	0.33	MA	1.74433	3.67671	-0.187654	0.042271	-0.0938458	0.0103782	-0.8	0.88	0.809971	0.976725
101–200	Linear	2	0.33	PELT	-0.882228	1.61863	-0.249658	0.23862	-0.254601	0.209607	-1.31	2.11	0.699148	0.805545
101–200	Linear	2	0.33	PR	0.606748	0.455494	-0.172185	0.0456127	-0.0688239	0.0103521	-2	4	0.774548	0.951956
101–200	Linear	2	0.66	ARIMA	1.18241	1.86751	0.0298697	0.0584243	0.0619541	0.0106493	-0.7	0.96	0.879612	0.97655
101–200	Linear	2	0.66	FLSA	-1.23466	1.85988	-0.558104	0.357278	-0.408983	0.220601	-0.12	1.2	0.620389	0.796281
101–200	Linear	2	0.66	GAM	0.462153	0.3165	-0.131065	0.0240567	-0.0394442	0.00338727	-0.84	0.88	0.87939	0.987188
101–200	Linear	2	0.66	LOWESS	0.535253	0.386405	-0.121873	0.0240104	-0.0382621	0.0039813	-0.92	0.92	0.874924	0.9863
101–200	Linear	2	0.66	MA	1.38624	2.3066	-0.210268	0.0488825	-0.0919719	0.00953524	-0.54	0.62	0.831249	0.980709
101–200	Linear	2	0.66	PELT	-0.690382	1.2295	-0.194236	0.177671	-0.193712	0.158642	-1.16	1.76	0.755207	0.850588
101–200	Linear	2	0.66	PR	0.615911	0.43735	-0.170623	0.0398936	-0.0665202	0.00814332	-2	4	0.775859	0.95405
101–200	Linear	2	1	ARIMA	1.06045	1.48353	0.0158651	0.0455788	0.0605721	0.00913981	-0.82	0.94	0.878403	0.9793
101–200	Linear	2	1	FLSA	-1.23059	1.81674	-0.562763	0.359425	-0.408069	0.213789	-0.12	1.1	0.620243	0.801969
101–200	Linear	2	1	GAM	0.436971	0.284901	-0.126934	0.0216183	-0.0355117	0.00269009	-0.77	0.81	0.887814	0.988578
101–200	Linear	2	1	LOWESS	0.505298	0.356946	-0.121315	0.0221887	-0.0361094	0.00326383	-0.93	0.97	0.876282	0.986568
101–200	Linear	2	1	MA	1.23955	1.82714	-0.21775	0.0512194	-0.0908927	0.00914546	-0.3	0.5	0.849079	0.982436
101–200	Linear	2	1	PELT	-0.587216	0.986926	-0.145147	0.140332	-0.145503	0.124964	-1.11	1.59	0.796583	0.879972
101–200	Linear	2	1	PR	0.620061	0.431589	-0.169706	0.0376166	-0.0654768	0.00729874	-2	4	0.776497	0.954857
101–200	Linear	2	2	ARIMA	0.899275	0.879388	-0.0133185	0.00579278	0.054762	0.00529267	-0.84	0.9	0.884876	0.986363
101–200	Linear	2	2	FLSA	-1.3254	1.98716	-0.603507	0.392562	-0.442255	0.234811	-0.21	1.01	0.589143	0.784806
101–200	Linear	2	2	GAM	0.398952	0.241223	-0.121705	0.0190397	-0.0307158	0.00204424	-0.77	0.77	0.892562	0.989683
101–200	Linear	2	2	LOWESS	0.469622	0.310951	-0.121115	0.0202389	-0.0341695	0.00263734	-0.87	0.87	0.8823	0.988154
101–200	Linear	2	2	MA	1.07218	1.3455	-0.224112	0.0531186	-0.0892337	0.00863435	-0.04	0.68	0.869389	0.981591
101–200	Linear	2	2	PELT	-0.456476	0.628493	-0.105148	0.0915612	-0.0928036	0.0777276	-0.85	1.21	0.853847	0.922543
101–200	Linear	2	2	PR	0.625325	0.426484	-0.168355	0.0350241	-0.0641534	0.00636716	-2	4	0.777344	0.955752
101–200	Quadratic	0.25	0.33	ARIMA	0.836317	3.41482	0.100253	0.0423158	0.0791414	0.0487829	-2.65	7.25	0.736934	0.892392
101–200	Quadratic	0.25	0.33	FLSA	0.163446	0.154319	0.038334	0.00407846	0.06207	0.0172185	-1.22	2.96	0.867577	0.959766
101–200	Quadratic	0.25	0.33	GAM	0.709232	0.899072	0.100792	0.0227129	0.168999	0.0500916	-1.74	3.26	0.750746	0.930383
101–200	Quadratic	0.25	0.33	LOWESS	0.841669	0.961342	0.105975	0.021471	0.187475	0.0481137	-1.86	3.66	0.729797	0.928384
101–200	Quadratic	0.25	0.33	MA	3.42649	13.0144	0.202298	0.048566	0.209593	0.0507342	-2	4	0.638075	0.908446
101–200	Quadratic	0.25	0.33	PELT	-0.224897	0.0731848	-0.00581806	0.000114808	-0.0600844	0.00434646	-2.95	8.79	0.758509	0.916995
101–200	Quadratic	0.25	0.33	PR	0.614208	1.14617	0.0848589	0.0261011	0.129775	0.0430993	-2.93	8.67	0.701817	0.887598
101–200	Quadratic	0.25	0.66	ARIMA	0.460443	1.8329	0.0517855	0.0160357	0.0286996	0.0268918	-2.73	7.65	0.77435	0.908153
101–200	Quadratic	0.25	0.66	FLSA	0.0778213	0.0932638	0.0203212	0.00189181	0.0394523	0.00997902	-1.13	2.49	0.89229	0.969645
101–200	Quadratic	0.25	0.66	GAM	0.493357	0.509503	0.0599092	0.0092389	0.118067	0.0279236	-1.76	3.34	0.78955	0.947612
101–200	Quadratic	0.25	0.66	LOWESS	0.633077	0.651297	0.0667529	0.00996514	0.130568	0.0278034	-1.92	3.78	0.768303	0.943583
101–200	Quadratic	0.25	0.66	MA	2.90107	9.80476	0.137786	0.0235115	0.158187	0.0294933	-2.01	4.05	0.686275	0.929017
101–200	Quadratic	0.25	0.66	PELT	-0.142285	0.277913	0.000738112	0.00178813	-0.0542027	0.00621542	-2.89	8.57	0.76819	0.917321
101–200	Quadratic	0.25	0.66	PR	0.411811	0.609759	0.0473016	0.00854438	0.0870085	0.0223804	-2.96	8.8	0.732266	0.902965
101–200	Quadratic	0.25	1	ARIMA	0.408246	1.61286	0.042748	0.0113812	0.0190435	0.0225869	-2.75	7.75	0.780785	0.910921
101–200	Quadratic	0.25	1	FLSA	0.0542161	0.0716701	0.0138868	0.001032	0.0287678	0.00645912	-0.95	1.95	0.912653	0.977256
101–200	Quadratic	0.25	1	GAM	0.400393	0.373477	0.0448325	0.005621	0.0953753	0.0200632	-1.74	3.3	0.808185	0.954243
101–200	Quadratic	0.25	1	LOWESS	0.527148	0.517834	0.0516289	0.00676805	0.103903	0.0204764	-1.92	3.76	0.787799	0.949579
101–200	Quadratic	0.25	1	MA	2.69596	8.69472	0.115189	0.016913	0.136439	0.0222213	-2.02	4.1	0.705456	0.935644
101–200	Quadratic	0.25	1	PELT	-0.222217	0.091004	-0.00164265	0.00150216	-0.0587107	0.00471446	-2.97	8.87	0.758781	0.915884
101–200	Quadratic	0.25	1	PR	0.365351	0.561646	0.0392718	0.00667063	0.0710652	0.0168219	-2.95	8.75	0.743296	0.90753
101–200	Quadratic	0.25	2	ARIMA	0.331955	1.62668	0.0425139	0.0327528	0.00716187	0.0226137	-2.78	7.9	0.786231	0.907902
101–200	Quadratic	0.25	2	FLSA	0.0686918	0.111232	0.0170198	0.00178624	0.0235296	0.00743704	-1.05	2.37	0.907799	0.972623
101–200	Quadratic	0.25	2	GAM	0.283548	0.233079	0.0284146	0.00266773	0.0671197	0.012073	-1.78	3.36	0.82683	0.960032
101–200	Quadratic	0.25	2	LOWESS	0.403778	0.390653	0.0358711	0.00416061	0.0721754	0.0131345	-1.93	3.81	0.809982	0.95491
101–200	Quadratic	0.25	2	MA	2.45107	7.32829	0.0940459	0.0114842	0.113575	0.0153875	-2.01	4.05	0.727164	0.943025
101–200	Quadratic	0.25	2	PELT	-0.149828	0.123573	0.00201122	0.00131504	-0.052272	0.00439932	-2.87	8.39	0.770073	0.920432
101–200	Quadratic	0.25	2	PR	0.278126	0.442513	0.0269781	0.00382348	0.0480795	0.010252	-2.96	8.8	0.758212	0.912064
101–200	Quadratic	0.5	0.33	ARIMA	0.658314	3.24071	0.0931972	0.045913	0.0331295	0.0496857	-2.63	7.15	0.76609	0.892528
101–200	Quadratic	0.5	0.33	FLSA	-0.0498152	0.13847	0.0204862	0.00471945	0.00597407	0.0135857	-1.03	2.13	0.918966	0.969906
101–200	Quadratic	0.5	0.33	GAM	0.512564	0.725526	0.101237	0.0275567	0.128208	0.0452828	-1.66	3.1	0.781776	0.935181
101–200	Quadratic	0.5	0.33	LOWESS	0.664247	0.768496	0.103721	0.0241636	0.140234	0.0387277	-1.81	3.55	0.762114	0.936309
101–200	Quadratic	0.5	0.33	MA	3.25462	12.1913	0.193098	0.0464248	0.159428	0.0334038	-2	4	0.668792	0.922261
101–200	Quadratic	0.5	0.33	PELT	-0.485662	0.248928	-0.0278694	0.000786062	-0.126355	0.0160703	-2.97	8.87	0.714852	0.907764
101–200	Quadratic	0.5	0.33	PR	0.418249	0.974125	0.0763789	0.0295665	0.0809868	0.0365185	-2.93	8.67	0.731047	0.892153
101–200	Quadratic	0.5	0.66	ARIMA	0.444368	2.10374	0.0534437	0.0195799	0.00304768	0.0335969	-2.64	7.2	0.793266	0.90679
101–200	Quadratic	0.5	0.66	FLSA	-0.150883	0.125063	0.00204275	0.00220584	-0.0237842	0.00993076	-0.95	2.11	0.915796	0.973047
101–200	Quadratic	0.5	0.66	GAM	0.297721	0.416297	0.056306	0.011286	0.0778153	0.0263405	-1.66	3.1	0.822856	0.950868
101–200	Quadratic	0.5	0.66	LOWESS	0.448072	0.498234	0.0611723	0.0108427	0.085086	0.0229543	-1.82	3.58	0.804111	0.949055
101–200	Quadratic	0.5	0.66	MA	2.75629	9.28752	0.12639	0.0215393	0.105815	0.0167142	-2.01	4.05	0.718548	0.939156
101–200	Quadratic	0.5	0.66	PELT	-0.407892	0.400877	-0.0209192	0.00215144	-0.118734	0.0175231	-2.91	8.65	0.725379	0.908447
101–200	Quadratic	0.5	0.66	PR	0.267302	0.637336	0.0453794	0.0136339	0.0469223	0.0232732	-2.93	8.67	0.757122	0.903072
101–200	Quadratic	0.5	1	ARIMA	0.350357	1.79628	0.0372903	0.0130056	-0.0144762	0.0280172	-2.67	7.35	0.790899	0.910282
101–200	Quadratic	0.5	1	FLSA	-0.23185	0.132442	-0.00589321	0.00147401	-0.0386829	0.00996968	-1.16	2.64	0.890165	0.968289
101–200	Quadratic	0.5	1	GAM	0.213239	0.314272	0.0398091	0.00689503	0.0570543	0.0198141	-1.72	3.22	0.835459	0.95511
101–200	Quadratic	0.5	1	LOWESS	0.349006	0.40081	0.0441742	0.00721387	0.0592449	0.0172507	-1.91	3.77	0.817677	0.951972
101–200	Quadratic	0.5	1	MA	2.56701	8.17425	0.104042	0.0152911	0.082241	0.0111188	-2.02	4.1	0.738495	0.944523
101–200	Quadratic	0.5	1	PELT	-0.473525	0.264953	-0.02309	0.00194077	-0.122573	0.0162298	-2.97	8.87	0.717904	0.907546
101–200	Quadratic	0.5	1	PR	0.164699	0.438958	0.0269489	0.00658051	0.0253945	0.0158203	-2.96	8.8	0.77162	0.907922
101–200	Quadratic	0.5	2	ARIMA	0.18398	1.71714	0.0294697	0.0337044	-0.0424648	0.0276361	-2.74	7.7	0.777212	0.905941
101–200	Quadratic	0.5	2	FLSA	-0.211444	0.131939	-0.00425892	0.00143115	-0.0353851	0.00991731	-1.11	2.31	0.896272	0.971307
101–200	Quadratic	0.5	2	GAM	0.131812	0.214272	0.022777	0.00328806	0.0343013	0.012882	-1.78	3.38	0.849172	0.959223
101–200	Quadratic	0.5	2	LOWESS	0.268816	0.341676	0.0305	0.00472377	0.0375281	0.0128762	-1.84	3.56	0.83867	0.957358
101–200	Quadratic	0.5	2	MA	2.41786	7.45714	0.0865715	0.0110984	0.0601366	0.00659299	-2.03	4.15	0.756012	0.948514
101–200	Quadratic	0.5	2	PELT	-0.357037	0.409008	-0.0164077	0.00235776	-0.112539	0.0154862	-2.83	8.31	0.735519	0.912914
101–200	Quadratic	0.5	2	PR	0.115377	0.384059	0.0171914	0.004364	0.00959666	0.0113694	-2.95	8.75	0.783171	0.911743
101–200	Quadratic	1	0.33	ARIMA	1.00404	5.37152	0.166528	0.164398	0.0540462	0.0905381	-2.31	5.93	0.754579	0.862725
101–200	Quadratic	1	0.33	FLSA	-0.508355	0.377259	-0.0545746	0.00774712	-0.102245	0.027005	-1.05	2.13	0.844593	0.959314
101–200	Quadratic	1	0.33	GAM	0.263578	0.710924	0.0982971	0.0448094	0.0752812	0.0530453	-1.58	3.04	0.821555	0.928642
101–200	Quadratic	1	0.33	LOWESS	0.356934	0.685494	0.0787656	0.0295223	0.0598766	0.0374473	-1.8	3.72	0.817251	0.93544
101–200	Quadratic	1	0.33	MA	2.84179	9.75631	0.126538	0.0286407	0.0485149	0.0125666	-2	4	0.747011	0.941608
101–200	Quadratic	1	0.33	PELT	-0.987331	0.987738	-0.112663	0.0127035	-0.253815	0.0645348	-2.97	8.87	0.627158	0.871915
101–200	Quadratic	1	0.33	PR	0.373134	1.38481	0.102871	0.0629983	0.0604663	0.0607219	-2.72	7.64	0.750324	0.881063
101–200	Quadratic	1	0.66	ARIMA	0.907413	4.51846	0.131815	0.136112	0.0374048	0.0742748	-2.27	5.75	0.774798	0.878888
101–200	Quadratic	1	0.66	FLSA	-0.669943	0.523071	-0.0775642	0.00825192	-0.138425	0.0321066	-1.24	2.64	0.80379	0.950761
101–200	Quadratic	1	0.66	GAM	0.0925714	0.46632	0.0450662	0.0206229	0.0350759	0.0356717	-1.6	3	0.857115	0.944029
101–200	Quadratic	1	0.66	LOWESS	0.202648	0.448542	0.0313413	0.013791	0.0204216	0.0233591	-1.76	3.6	0.854648	0.948403
101–200	Quadratic	1	0.66	MA	2.43821	7.77446	0.0618328	0.0118833	-0.00289906	0.00749564	-2	4	0.79253	0.948788
101–200	Quadratic	1	0.66	PELT	-0.901189	1.04409	-0.105125	0.0128742	-0.24339	0.063733	-2.89	8.57	0.639809	0.874998
101–200	Quadratic	1	0.66	PR	0.186313	0.861969	0.0423019	0.0263447	0.0191227	0.0377337	-2.75	7.77	0.785366	0.899589
101–200	Quadratic	1	1	ARIMA	0.761344	3.49337	0.0956648	0.0784758	0.0160097	0.0622224	-2.27	5.87	0.796355	0.8919
101–200	Quadratic	1	1	FLSA	-0.638923	0.495707	-0.0777441	0.0083207	-0.134032	0.0285766	-0.99	2.09	0.822633	0.958312
101–200	Quadratic	1	1	GAM	0.0335002	0.363046	0.0237764	0.0135702	0.0202532	0.0278217	-1.62	3.1	0.86978	0.949647
101–200	Quadratic	1	1	LOWESS	0.159323	0.345675	0.016787	0.00968041	0.0105951	0.0183098	-1.6	3.54	0.87515	0.953115
101–200	Quadratic	1	1	MA	2.28248	6.97307	0.0399999	0.00792156	-0.0220318	0.00655759	-2.02	4.1	0.78896	0.949758
101–200	Quadratic	1	1	PELT	-0.951785	0.985774	-0.106706	0.0129089	-0.247736	0.0630167	-2.93	8.71	0.63413	0.874354
101–200	Quadratic	1	1	PR	0.105775	0.6457	0.0203308	0.0176748	0.00433468	0.029502	-2.76	7.82	0.798465	0.905896
101–200	Quadratic	1	2	ARIMA	0.570506	2.87838	0.0598069	0.0549181	-0.0180617	0.0542651	-2.27	6.11	0.806972	0.897981
101–200	Quadratic	1	2	FLSA	-0.682784	0.520225	-0.0839153	0.00793029	-0.139412	0.0274149	-1.1	2.48	0.810454	0.955723
101–200	Quadratic	1	2	GAM	-0.0173614	0.252226	-0.00227011	0.00766546	0.00128217	0.017028	-1.61	3.01	0.88597	0.959074
101–200	Quadratic	1	2	LOWESS	0.127588	0.280972	0.00284583	0.00689638	0.00129573	0.0135003	-1.54	3.68	0.888209	0.955713
101–200	Quadratic	1	2	MA	2.20641	6.70144	0.0229738	0.0053287	-0.0432811	0.00627535	-2.04	4.2	0.781508	0.949564
101–200	Quadratic	1	2	PELT	-0.792355	1.24956	-0.0907089	0.0158238	-0.232721	0.0601774	-2.8	8.22	0.655	0.880107
101–200	Quadratic	1	2	PR	0.0174173	0.441254	-0.00750679	0.0093766	-0.0157085	0.0195898	-2.8	8	0.794612	0.912198
101–200	Quadratic	2	0.33	ARIMA	1.07657	6.18429	0.173592	0.298944	0.021182	0.143879	-2.12	5.1	0.780748	0.820983
101–200	Quadratic	2	0.33	FLSA	-1.4321	2.28206	-0.355134	0.140635	-0.327358	0.130266	-1.33	2.99	0.62984	0.863155
101–200	Quadratic	2	0.33	GAM	0.171915	0.89502	0.054491	0.116799	0.0300409	0.0646183	-1.76	3.36	0.845154	0.911699
101–200	Quadratic	2	0.33	LOWESS	0.12684	0.671266	-0.0179994	0.0685281	-0.0113715	0.0454642	-1.9	3.74	0.854459	0.92639
101–200	Quadratic	2	0.33	MA	1.89746	5.3084	-0.16768	0.0530584	-0.16361	0.0417847	-2	4	0.699741	0.923001
101–200	Quadratic	2	0.33	PELT	-1.64211	3.61042	-0.342153	0.188704	-0.417463	0.224591	-2.78	8.02	0.510172	0.751348
101–200	Quadratic	2	0.33	PR	0.367801	2.32925	0.0735789	0.199506	0.0110202	0.0845892	-2.45	6.63	0.799551	0.861668
101–200	Quadratic	2	0.66	ARIMA	1.04804	5.63192	0.14009	0.250791	0.0138191	0.119052	-2.16	5.02	0.789472	0.843357
101–200	Quadratic	2	0.66	FLSA	-1.41424	2.18532	-0.357176	0.136408	-0.32024	0.119272	-1	2.1	0.651168	0.879001
101–200	Quadratic	2	0.66	GAM	0.135571	0.500324	-0.000356267	0.0654711	0.0143277	0.0375395	-1.72	3.26	0.868916	0.936883
101–200	Quadratic	2	0.66	LOWESS	0.0379975	0.397325	-0.0639534	0.0464543	-0.0297761	0.0308199	-1.96	3.88	0.832523	0.937936
101–200	Quadratic	2	0.66	MA	1.44993	3.80767	-0.237024	0.0730399	-0.207353	0.0546607	-2	4	0.674026	0.913637
101–200	Quadratic	2	0.66	PELT	-1.29372	3.00035	-0.229703	0.166253	-0.324131	0.180737	-2.5	6.86	0.592987	0.793234
101–200	Quadratic	2	0.66	PR	0.319071	1.74651	0.02242	0.138389	-0.00459849	0.0588854	-2.33	6.29	0.823206	0.888026
101–200	Quadratic	2	1	ARIMA	1.18689	4.24749	0.135796	0.153457	0.0471859	0.0803591	-2.09	4.65	0.775051	0.882852
101–200	Quadratic	2	1	FLSA	-1.49925	2.39666	-0.375136	0.1474	-0.3456	0.13318	-1.24	2.6	0.620415	0.863575
101–200	Quadratic	2	1	GAM	0.135891	0.368846	-0.0147043	0.047763	0.0123868	0.0276751	-1.61	3.09	0.874453	0.947207
101–200	Quadratic	2	1	LOWESS	0.00399954	0.332373	-0.0789252	0.0416507	-0.036235	0.0263533	-1.85	3.73	0.834141	0.943005
101–200	Quadratic	2	1	MA	1.34976	3.51949	-0.259707	0.0810484	-0.226334	0.0612664	-2	4	0.662433	0.908492
101–200	Quadratic	2	1	PELT	-0.92561	3.03518	-0.164783	0.136746	-0.260009	0.149092	-2.26	5.92	0.656471	0.825234
101–200	Quadratic	2	1	PR	0.296476	1.43304	-0.00108063	0.108516	-0.0102793	0.0481082	-2.26	6.02	0.830181	0.900681
101–200	Quadratic	2	2	ARIMA	1.50565	3.4313	0.18098	0.107297	0.110914	0.0419057	-2	4.12	0.732394	0.91977
101–200	Quadratic	2	2	FLSA	-1.54467	2.5181	-0.384738	0.153428	-0.360504	0.14246	-1.34	3.1	0.605047	0.852118
101–200	Quadratic	2	2	GAM	0.0925291	0.24348	-0.0333572	0.0331129	0.00708527	0.0193943	-1.66	3.16	0.870817	0.954005
101–200	Quadratic	2	2	LOWESS	-0.0489489	0.233756	-0.0913854	0.0356234	-0.0382301	0.0214954	-1.63	3.73	0.844413	0.947168
101–200	Quadratic	2	2	MA	1.27627	3.22832	-0.280807	0.0889424	-0.244909	0.0677106	-2	4	0.650875	0.903484
101–200	Quadratic	2	2	PELT	-0.508805	3.25348	-0.111419	0.102728	-0.198917	0.11677	-1.94	4.78	0.725106	0.860028
101–200	Quadratic	2	2	PR	0.223862	0.862983	-0.0401701	0.0696623	-0.0177034	0.0306399	-2.19	5.59	0.824218	0.920632
101–200	Recurrent	0.25	0.33	ARIMA	0.624824	4.77313	0.0851624	0.165364	-0.0115107	0.0449311	-2.76	7.94	0.770338	0.878412
101–200	Recurrent	0.25	0.33	FLSA	0.417763	0.776606	0.0720728	0.0178059	0.0650749	0.0199626	-0.97	2.17	0.869534	0.963035
101–200	Recurrent	0.25	0.33	GAM	0.790576	0.810319	0.0937771	0.0131119	0.15777	0.0363537	-1.98	3.94	0.741538	0.935427
101–200	Recurrent	0.25	0.33	LOWESS	0.843487	0.837917	0.113138	0.0170727	0.182039	0.0418985	-1.82	3.46	0.73368	0.935213
101–200	Recurrent	0.25	0.33	MA	5.27333	34.2529	0.323328	0.122758	0.21307	0.0475889	-2	4	0.578374	0.882481
101–200	Recurrent	0.25	0.33	PELT	8.01994	89.1274	1.21983	2.11469	0.112949	0.0253999	-1.47	2.79	0.456403	0.711675
101–200	Recurrent	0.25	0.33	PR	1.0325	3.5333	0.125964	0.062917	0.156298	0.0359168	-2.95	8.81	0.671563	0.886166
101–200	Recurrent	0.25	0.66	ARIMA	1.00391	4.07847	0.0767858	0.0245872	0.0322186	0.0343646	-2.54	6.96	0.768955	0.905903
101–200	Recurrent	0.25	0.66	FLSA	0.230262	0.490232	0.0452232	0.0125341	0.0392465	0.0154717	-1.36	2.94	0.867965	0.960226
101–200	Recurrent	0.25	0.66	GAM	0.924208	1.01332	0.117948	0.0184708	0.192162	0.046477	-1.98	3.94	0.71611	0.927318
101–200	Recurrent	0.25	0.66	LOWESS	0.95146	1.02402	0.13706	0.0232847	0.214117	0.0533847	-1.79	3.49	0.711745	0.925755
101–200	Recurrent	0.25	0.66	MA	3.90202	21.5945	0.242278	0.0713944	0.214522	0.0494984	-1.88	3.66	0.625362	0.901324
101–200	Recurrent	0.25	0.66	PELT	8.8834	100.141	1.33582	2.32879	0.11747	0.0262978	-1.36	2.52	0.428306	0.688643
101–200	Recurrent	0.25	0.66	PR	1.39799	6.23361	0.180617	0.115697	0.191424	0.0466014	-2.88	8.58	0.641644	0.873914
101–200	Recurrent	0.25	1	ARIMA	1.21156	4.30813	0.0993192	0.0274587	0.07654	0.0408012	-2.4	6.3	0.746898	0.906605
101–200	Recurrent	0.25	1	FLSA	0.337	0.43759	0.0616161	0.0118428	0.0754381	0.0199409	-1.01	2.35	0.86504	0.962277
101–200	Recurrent	0.25	1	GAM	0.992478	1.12538	0.130691	0.0220227	0.208877	0.0519487	-1.99	3.97	0.703002	0.922624
101–200	Recurrent	0.25	1	LOWESS	1.0067	1.12909	0.150042	0.0272667	0.230583	0.0599551	-1.67	3.11	0.706485	0.923758
101–200	Recurrent	0.25	1	MA	3.1057	14.4644	0.211993	0.0529823	0.226613	0.0559018	-1.68	3.16	0.651872	0.909929
101–200	Recurrent	0.25	1	PELT	9.03362	102.648	1.37006	2.40289	0.127356	0.0306685	-1.3	2.48	0.419899	0.679037
101–200	Recurrent	0.25	1	PR	1.6201	7.87944	0.218334	0.163548	0.207602	0.0515498	-2.82	8.4	0.626299	0.866734
101–200	Recurrent	0.25	2	ARIMA	1.72096	4.75959	0.15899	0.0462143	0.187811	0.0577826	-1.94	4.42	0.696158	0.908697
101–200	Recurrent	0.25	2	FLSA	0.166088	0.128778	0.0365175	0.00413127	0.0483325	0.0148872	-1.24	2.8	0.874305	0.962967
101–200	Recurrent	0.25	2	GAM	1.07692	1.28541	0.149065	0.0278875	0.230852	0.0604889	-1.99	3.97	0.686476	0.915705
101–200	Recurrent	0.25	2	LOWESS	1.08416	1.28482	0.168109	0.0336132	0.250928	0.0692575	-1.67	3.01	0.690793	0.917053
101–200	Recurrent	0.25	2	MA	2.58589	10.664	0.199958	0.0459639	0.2372	0.061808	-1.37	2.41	0.676554	0.916599
101–200	Recurrent	0.25	2	PELT	9.31638	105.581	1.42581	2.48903	0.193521	0.0499756	-0.99	1.71	0.396477	0.664944
101–200	Recurrent	0.25	2	PR	1.78745	9.15598	0.246244	0.188808	0.229896	0.0602609	-2.82	8.34	0.607621	0.857979
101–200	Recurrent	0.5	0.33	ARIMA	0.739834	4.37813	0.0464411	0.0331034	-0.0712177	0.047458	-2.61	7.25	0.756481	0.893027
101–200	Recurrent	0.5	0.33	FLSA	0.191174	1.19988	0.031228	0.0190828	-0.0335849	0.0170576	-1.09	2.27	0.893375	0.963758
101–200	Recurrent	0.5	0.33	GAM	0.755473	0.789384	0.0925548	0.0154965	0.107135	0.0249248	-1.99	3.97	0.768419	0.943447
101–200	Recurrent	0.5	0.33	LOWESS	0.775072	0.780067	0.109768	0.0187745	0.124335	0.0266101	-1.76	3.32	0.770084	0.947738
101–200	Recurrent	0.5	0.33	MA	3.71728	18.3331	0.221199	0.0606358	0.136596	0.0220537	-1.99	3.97	0.666274	0.923192
101–200	Recurrent	0.5	0.33	PELT	7.61452	83.4301	1.17547	2.04627	0.0346081	0.0170294	-1.48	2.82	0.500718	0.726601
101–200	Recurrent	0.5	0.33	PR	1.27007	6.32917	0.166618	0.132386	0.107001	0.0250169	-2.88	8.56	0.686802	0.887839
101–200	Recurrent	0.5	0.66	ARIMA	1.56924	5.45624	0.127648	0.0425263	0.0666814	0.042314	-1.93	5.25	0.768904	0.912332
101–200	Recurrent	0.5	0.66	FLSA	0.0875074	0.370627	0.0199976	0.0118997	-0.0343415	0.0147359	-1.09	2.35	0.897777	0.966251
101–200	Recurrent	0.5	0.66	GAM	0.904793	0.978583	0.122297	0.0217948	0.144809	0.0305225	-1.97	3.91	0.740942	0.939155
101–200	Recurrent	0.5	0.66	LOWESS	0.905793	0.965225	0.139488	0.0260227	0.161025	0.0340527	-1.72	3.24	0.744479	0.942158
101–200	Recurrent	0.5	0.66	MA	2.11666	4.78464	0.152984	0.0247334	0.149878	0.0270466	-1.8	3.48	0.716834	0.941189
101–200	Recurrent	0.5	0.66	PELT	8.69474	96.7113	1.32558	2.32079	0.0424488	0.0176518	-1.32	2.42	0.46362	0.698317
101–200	Recurrent	0.5	0.66	PR	1.18725	3.89814	0.158894	0.0777075	0.142765	0.029904	-2.94	8.76	0.669242	0.889323
101–200	Recurrent	0.5	1	ARIMA	1.8611	5.69759	0.156553	0.044035	0.118067	0.0392333	-1.77	4.31	0.740123	0.922432
101–200	Recurrent	0.5	1	FLSA	0.224773	1.8793	0.0356162	0.0304883	-0.0265627	0.0140489	-0.97	2.03	0.90385	0.966537
101–200	Recurrent	0.5	1	GAM	0.972829	1.08771	0.137942	0.0261237	0.161986	0.0345259	-1.97	3.91	0.727551	0.935748
101–200	Recurrent	0.5	1	LOWESS	0.970573	1.07105	0.155276	0.0307293	0.178608	0.0388173	-1.78	3.34	0.727163	0.937262
101–200	Recurrent	0.5	1	MA	1.91111	3.90198	0.149478	0.023972	0.154058	0.0289217	-1.53	2.79	0.735841	0.946916
101–200	Recurrent	0.5	1	PELT	8.77047	97.6545	1.34688	2.36414	0.0513699	0.020289	-1.3	2.42	0.456561	0.692882
101–200	Recurrent	0.5	1	PR	1.51833	6.99829	0.216172	0.160262	0.161446	0.0345932	-2.85	8.49	0.648569	0.878949
101–200	Recurrent	0.5	2	ARIMA	1.73379	4.25854	0.161912	0.0380866	0.141541	0.0397622	-1.75	4.13	0.730743	0.925618
101–200	Recurrent	0.5	2	FLSA	0.016161	0.178657	0.00359616	0.00414671	-0.0372642	0.0123316	-1	2	0.90743	0.972019
101–200	Recurrent	0.5	2	GAM	1.05873	1.24684	0.159682	0.0332752	0.183792	0.040964	-1.98	3.94	0.709731	0.930012
101–200	Recurrent	0.5	2	LOWESS	1.05211	1.22489	0.176573	0.0383439	0.199559	0.0460928	-1.81	3.43	0.708684	0.93033
101–200	Recurrent	0.5	2	MA	1.63091	2.83333	0.148182	0.0244194	0.163715	0.0323257	-1.33	2.31	0.749027	0.949745
101–200	Recurrent	0.5	2	PELT	9.15272	102.363	1.42495	2.49427	0.132504	0.0320357	-0.88	1.62	0.427916	0.679
101–200	Recurrent	0.5	2	PR	1.52376	6.34597	0.224094	0.147965	0.182568	0.0405898	-2.88	8.58	0.635305	0.87557
101–200	Recurrent	1	0.33	ARIMA	1.70453	8.95634	0.0972806	0.309266	-0.0556861	0.0702747	-2.14	5.26	0.764372	0.868513
101–200	Recurrent	1	0.33	FLSA	-0.371995	0.481748	-0.142369	0.0332088	-0.242283	0.0794059	-1.19	2.63	0.743627	0.913641
101–200	Recurrent	1	0.33	GAM	0.719489	0.740006	0.0260029	0.0148731	0.0138414	0.0136476	-2	4	0.831565	0.951612
101–200	Recurrent	1	0.33	LOWESS	0.700113	0.708421	0.0359774	0.0142616	0.0206816	0.0118335	-1.85	3.55	0.836378	0.957081
101–200	Recurrent	1	0.33	MA	2.12768	4.876	0.0267448	0.00343601	-0.0184012	0.00530017	-1.98	3.94	0.799569	0.95474
101–200	Recurrent	1	0.33	PELT	6.92214	74.8756	1.03705	1.82548	-0.127307	0.0416868	-1.5	2.92	0.496712	0.733569
101–200	Recurrent	1	0.33	PR	1.13759	5.21779	0.0907721	0.123255	0.0130229	0.0136337	-2.91	8.65	0.748002	0.896845
101–200	Recurrent	1	0.66	ARIMA	2.05117	6.73514	0.111242	0.0436333	0.0172855	0.0302672	-1.85	4.21	0.792963	0.928816
101–200	Recurrent	1	0.66	FLSA	-0.353187	0.342629	-0.136904	0.0304228	-0.21761	0.0669678	-1	2.12	0.770036	0.927687
101–200	Recurrent	1	0.66	GAM	0.871583	0.921392	0.0676737	0.0173807	0.0514861	0.0120852	-2	4	0.799563	0.952375
101–200	Recurrent	1	0.66	LOWESS	0.850099	0.878284	0.0772114	0.0174497	0.0583429	0.0114344	-1.91	3.73	0.800365	0.955325
101–200	Recurrent	1	0.66	MA	1.5494	2.61549	0.0114709	0.00319195	-0.00851189	0.00501461	-1.66	3.12	0.84202	0.964815
101–200	Recurrent	1	0.66	PELT	8.1165	88.7224	1.21218	2.12864	-0.106856	0.0382755	-1.3	2.46	0.467082	0.70571
101–200	Recurrent	1	0.66	PR	1.44464	6.54473	0.159579	0.168758	0.0501833	0.0120318	-2.84	8.42	0.714418	0.895142
101–200	Recurrent	1	1	ARIMA	2.23849	8.43006	0.17521	0.176075	0.0578731	0.0310201	-1.83	3.77	0.756058	0.920231
101–200	Recurrent	1	1	FLSA	-0.447546	0.424439	-0.157406	0.0347338	-0.246391	0.0800829	-1.2	2.7	0.736314	0.912489
101–200	Recurrent	1	1	GAM	0.940753	1.02848	0.0887557	0.0205468	0.0685078	0.0128696	-2	4	0.78479	0.951433
101–200	Recurrent	1	1	LOWESS	0.916895	0.977637	0.0973541	0.0208739	0.0752956	0.0127094	-1.96	3.88	0.782591	0.952659
101–200	Recurrent	1	1	MA	1.30108	1.83158	0.00980715	0.00350002	0.0044501	0.00337926	-1.47	2.55	0.862981	0.972019
101–200	Recurrent	1	1	PELT	8.50385	91.7657	1.28472	2.19203	-0.0631465	0.0256982	-1.15	2.05	0.474173	0.709656
101–200	Recurrent	1	1	PR	1.46463	6.49236	0.168576	0.15604	0.0670792	0.0126189	-2.87	8.51	0.702213	0.894965
101–200	Recurrent	1	2	ARIMA	2.1662	5.84059	0.179709	0.0736059	0.0902878	0.0180943	-1.68	3.74	0.749198	0.940604
101–200	Recurrent	1	2	FLSA	-0.410335	0.380078	-0.143329	0.032234	-0.225504	0.0721177	-0.94	1.9	0.766659	0.925532
101–200	Recurrent	1	2	GAM	1.02827	1.18566	0.117433	0.0268807	0.0901169	0.015212	-2	4	0.765821	0.949042
101–200	Recurrent	1	2	LOWESS	1.00359	1.1269	0.126194	0.0272207	0.0968817	0.0155929	-1.97	3.91	0.762989	0.949605
101–200	Recurrent	1	2	MA	1.14245	1.40015	0.0173647	0.00351897	0.0169581	0.00342751	-1.25	2.07	0.872793	0.976797
101–200	Recurrent	1	2	PELT	8.83024	95.267	1.36789	2.30969	0.0138916	0.0145189	-0.75	1.39	0.495829	0.710542
101–200	Recurrent	1	2	PR	1.27988	3.51435	0.153596	0.0825393	0.0893397	0.0150757	-2.93	8.73	0.694418	0.900017
101–200	Recurrent	2	0.33	ARIMA	2.97053	13.4901	0.0334231	0.317172	-0.0633033	0.0527271	-1.87	3.91	0.762725	0.887282
101–200	Recurrent	2	0.33	FLSA	-1.06085	1.64617	-0.760096	0.62803	-0.560969	0.357242	-1.04	2.4	0.474279	0.67242
101–200	Recurrent	2	0.33	GAM	0.663361	0.681067	-0.362448	0.169025	-0.173834	0.0431019	-2	4	0.683039	0.918201
101–200	Recurrent	2	0.33	LOWESS	0.715458	0.743102	-0.334257	0.145416	-0.17357	0.0384284	-1.87	3.91	0.695467	0.924137
101–200	Recurrent	2	0.33	MA	1.05075	1.3331	-0.607547	0.376269	-0.334048	0.116047	-1.93	3.81	0.56	0.851042
101–200	Recurrent	2	0.33	PELT	5.28992	59.2136	0.518675	1.20142	-0.430284	0.235068	-1.6	3.22	0.462353	0.659911
101–200	Recurrent	2	0.33	PR	0.871804	2.7688	-0.324673	0.212181	-0.172502	0.0429364	-2.94	8.78	0.629618	0.870965
101–200	Recurrent	2	0.66	ARIMA	2.91609	10.155	0.109152	0.0574284	0.0122425	0.0118188	-1.68	3.4	0.788251	0.944851
101–200	Recurrent	2	0.66	FLSA	-1.0656	1.6779	-0.751531	0.624785	-0.557532	0.358219	-1.11	2.49	0.473932	0.671284
101–200	Recurrent	2	0.66	GAM	0.855684	0.897975	-0.282617	0.108743	-0.132694	0.0256999	-1.97	3.97	0.716776	0.935574
101–200	Recurrent	2	0.66	LOWESS	0.830154	0.830868	-0.23994	0.0816999	-0.124458	0.0207272	-1.28	3.52	0.773275	0.945402
101–200	Recurrent	2	0.66	MA	0.728561	0.65761	-0.604224	0.370672	-0.31963	0.105797	-1.63	2.99	0.589551	0.866357
101–200	Recurrent	2	0.66	PELT	7.11229	75.5484	0.840725	1.40958	-0.317743	0.151221	-1.03	2.05	0.461423	0.69564
101–200	Recurrent	2	0.66	PR	1.0084	2.82563	-0.270154	0.144587	-0.135233	0.0275232	-2.96	8.82	0.653293	0.88643
101–200	Recurrent	2	1	ARIMA	2.84486	9.57455	0.144033	0.0584938	0.0326384	0.0115093	-1.44	3.32	0.787164	0.946338
101–200	Recurrent	2	1	FLSA	-1.11855	1.6874	-0.781132	0.65441	-0.569216	0.363888	-1.07	2.37	0.465111	0.666344
101–200	Recurrent	2	1	GAM	0.940162	1.02383	-0.244624	0.0853503	-0.113877	0.0194816	-1.97	3.97	0.731977	0.941809
101–200	Recurrent	2	1	LOWESS	0.877197	0.884987	-0.188193	0.0549322	-0.0976946	0.0136598	-1.16	3.3	0.804639	0.954617
101–200	Recurrent	2	1	MA	0.603048	0.459182	-0.596637	0.361057	-0.310225	0.099594	-1.43	2.43	0.60875	0.876453
101–200	Recurrent	2	1	PELT	8.10207	83.851	1.02752	1.57403	-0.227443	0.105055	-0.67	1.57	0.474105	0.711293
101–200	Recurrent	2	1	PR	1.25493	4.10186	-0.199685	0.138308	-0.110698	0.0197814	-2.85	8.47	0.6807	0.894127
101–200	Recurrent	2	2	ARIMA	2.7814	8.99606	0.191817	0.0650055	0.056979	0.0112345	-1.15	3.49	0.78414	0.945151
101–200	Recurrent	2	2	FLSA	-1.09539	1.62468	-0.771404	0.643752	-0.560918	0.353372	-0.97	2.09	0.475131	0.676349
101–200	Recurrent	2	2	GAM	1.03579	1.19606	-0.195309	0.0621152	-0.0903357	0.0137223	-1.97	3.97	0.751787	0.947661
101–200	Recurrent	2	2	LOWESS	0.941803	0.987719	-0.135284	0.0341359	-0.0702496	0.00867516	-1.05	3.33	0.836178	0.959553
101–200	Recurrent	2	2	MA	0.462573	0.285212	-0.584929	0.347156	-0.296701	0.0911984	-1.34	2.24	0.6251	0.885378
101–200	Recurrent	2	2	PELT	8.59565	92.9547	1.18947	1.97445	-0.129268	0.05206	-0.21	1.37	0.507019	0.712142
101–200	Recurrent	2	2	PR	1.32818	3.80137	-0.154197	0.106562	-0.0867028	0.0138362	-2.82	8.34	0.701615	0.90222
201–500	No change	0	0.33	ARIMA	1.70858	4.67576	0.0942507	0.0175107	0.180768	0.0528849	0.683333	0.683333	0.786102	0.946925
201–500	No change	0	0.33	FLSA	0.313847	0.163576	0.0174324	0.000867363	0.0605129	0.00630687	1.95	5.11667	0.820706	0.94866
201–500	No change	0	0.33	GAM	0.415812	0.247423	0.0193183	0.000937874	0.0986909	0.0128821	1.06667	1.2	0.854879	0.978972
201–500	No change	0	0.33	LOWESS	0.444543	0.23806	0.0194154	0.000685503	0.0999737	0.0122053	1.26667	1.96667	0.840509	0.972618
201–500	No change	0	0.33	MA	4.63507	22.141	0.151202	0.024802	0.209115	0.0448235	1	1	0.674051	0.930363
201–500	No change	0	0.33	PELT	1.99818	17.3735	0.166029	0.140763	0.0306118	0.00389748	0.466667	0.866667	0.865733	0.958987
201–500	No change	0	0.33	PR	0.437868	0.537427	0.0212101	0.00283988	0.0924726	0.0114608	0.0166667	0.0166667	0.925823	0.990229
201–500	No change	0	0.66	ARIMA	1.82493	5.10942	0.0926316	0.0164276	0.176539	0.049052	0.716667	0.716667	0.784124	0.949153
201–500	No change	0	0.66	FLSA	0.306493	0.162506	0.0153343	0.000636964	0.0529112	0.00495004	1.85	4.65	0.832078	0.953895
201–500	No change	0	0.66	GAM	0.356832	0.189088	0.0149105	0.000571399	0.0846712	0.00999118	1.06667	1.2	0.865216	0.98126
201–500	No change	0	0.66	LOWESS	0.390679	0.186623	0.0150539	0.00041403	0.0872463	0.00947408	1.18333	1.61667	0.855288	0.97791
201–500	No change	0	0.66	MA	3.99544	16.3236	0.107708	0.0123412	0.174927	0.0314437	1	1	0.715325	0.947916
201–500	No change	0	0.66	PELT	4.95304	41.1892	0.429875	0.33979	0.0923129	0.012401	1.41667	3.08333	0.658338	0.892559
201–500	No change	0	0.66	PR	0.778023	3.0254	0.0445537	0.0139206	0.0905239	0.0121426	0.15	0.283333	0.905062	0.983662
201–500	No change	0	1	ARIMA	1.88625	5.30545	0.0892417	0.0146746	0.171576	0.0449917	0.733333	0.733333	0.785187	0.952014
201–500	No change	0	1	FLSA	0.268181	0.135335	0.0123924	0.000450963	0.0441873	0.00371592	1.68333	3.98333	0.849501	0.960884
201–500	No change	0	1	GAM	0.331515	0.167874	0.0132466	0.000457742	0.0783633	0.00883393	1.03333	1.1	0.871973	0.983073
201–500	No change	0	1	LOWESS	0.366855	0.166305	0.0133702	0.000323949	0.0819765	0.00843929	1.23333	1.9	0.85591	0.976166
201–500	No change	0	1	MA	3.75525	14.3947	0.0926123	0.00904296	0.161578	0.0268726	1	1	0.731081	0.953782
201–500	No change	0	1	PELT	5.58819	46.1111	0.502309	0.400532	0.112697	0.0157964	1.86667	4.8	0.597766	0.865802
201–500	No change	0	1	PR	1.40503	6.7558	0.0926745	0.0344677	0.103571	0.0173595	0.416667	0.816667	0.855165	0.969175
201–500	No change	0	2	ARIMA	1.9149	5.4011	0.0836634	0.0120324	0.160738	0.0381486	0.733333	0.733333	0.79182	0.957319
201–500	No change	0	2	FLSA	0.288538	0.133615	0.0116108	0.000294619	0.0447667	0.00328131	1.88333	4.85	0.835418	0.953367
201–500	No change	0	2	GAM	0.300108	0.144332	0.0113799	0.00034053	0.0705438	0.00753553	1.08333	1.25	0.874296	0.98274
201–500	No change	0	2	LOWESS	0.339366	0.144897	0.0115641	0.00023953	0.0759719	0.00730359	1.28333	2.35	0.857033	0.972988
201–500	No change	0	2	MA	3.41962	11.8451	0.0772702	0.00625684	0.146849	0.0221748	1	1	0.749986	0.960399
201–500	No change	0	2	PELT	7.13686	60.3808	0.677155	0.577364	0.146935	0.0265995	2.65	8.45	0.483946	0.800401
201–500	No change	0	2	PR	1.52639	7.05391	0.105919	0.0387953	0.10429	0.0188701	0.516667	1.01667	0.842931	0.965587
201–500	Jump	0.25	0.33	ARIMA	1.48131	4.59576	0.0927087	0.0318333	0.115459	0.0436646	-0.35	0.35	0.850415	0.955865
201–500	Jump	0.25	0.33	FLSA	0.0911667	0.0583939	0.0166725	0.00112734	0.0493857	0.00777509	1.15	2.15	0.885732	0.974466
201–500	Jump	0.25	0.33	GAM	0.605048	0.445188	0.0558535	0.00469484	0.146464	0.0250916	0.283333	0.316667	0.864728	0.977061
201–500	Jump	0.25	0.33	LOWESS	0.64786	0.493931	0.0592267	0.00502498	0.142728	0.0238292	0.35	0.483333	0.861094	0.976461
201–500	Jump	0.25	0.33	MA	3.59615	13.6073	0.157348	0.025767	0.206626	0.0440954	0	0	0.752615	0.948955
201–500	Jump	0.25	0.33	PELT	0.190973	2.21617	0.0149973	0.00846671	-0.049554	0.00347465	-0.8	0.866667	0.907225	0.98635
201–500	Jump	0.25	0.33	PR	0.463669	0.311029	0.0392647	0.00297651	0.11714	0.0197768	-1	1	0.843424	0.975299
201–500	Jump	0.25	0.66	ARIMA	1.143	2.92491	0.058627	0.0130809	0.0820729	0.0274247	-0.383333	0.383333	0.883262	0.971267
201–500	Jump	0.25	0.66	FLSA	0.0715991	0.0616489	0.0134689	0.000818146	0.0402142	0.00647847	1.06667	2.2	0.897769	0.97501
201–500	Jump	0.25	0.66	GAM	0.538677	0.347273	0.044637	0.00287815	0.132421	0.0200897	0.25	0.383333	0.879161	0.980541
201–500	Jump	0.25	0.66	LOWESS	0.577168	0.391059	0.0491775	0.00334528	0.129938	0.0195341	0.366667	0.5	0.871439	0.979838
201–500	Jump	0.25	0.66	MA	2.76835	8.1948	0.114214	0.0136891	0.184059	0.0351871	0	0	0.794297	0.962758
[truncated: 912 more rows]
